# Supplementary material for: FRET-FISH probes chromatin compaction at individual genomic loci in single cells
Source: Research Square preprint supplement (doi:10.21203/rs.3.rs-1130822/v1), 2021-12-08
Supplement: Supplementary file 1 [file 827fae547b96e84d4ccb27b8.xlsx]

## Sheet: Suppl Table 4
Supplementary Table 4. List of datasets generated in this study.
All the datasets are available at the following DOI: 10.17044/scilifelab.17080892
Filename	Cell type	Gene targeted	FRET donor	FRET acceptor	Probe design	Inter-oligo spacing	Experiment description	Replicate #	Related figure
iAM491	HAP1	MYC	Cy3	-	Design 1	5nt	Probe design optimization	Rep1	Suppl. Fig. 1b
iAM492	HAP1	MYC	-	Cy5	Design 1	5nt	Probe design optimization	Rep1	Suppl. Fig. 1b
iAM493	HAP1	MYC	Cy3	Cy5	Design 1	5nt	Probe design optimization	Rep1	Suppl. Fig. 1b
iAM494	HAP1	MYC	Cy3	-	Design 2	5nt	Probe design optimization	Rep1	Suppl. Fig. 1b
iAM495	HAP1	MYC	-	Cy5	Design 2	5nt	Probe design optimization	Rep1	Suppl. Fig. 1b
iAM496	HAP1	MYC	Cy3	Cy5	Design 2	5nt	Probe design optimization	Rep1	Suppl. Fig. 1b
iAM497	HAP1	MYC	Cy3	-	Design 3	5nt	Probe design optimization	Rep1	Suppl. Fig. 1b
iAM498	HAP1	MYC	-	Cy5	Design 3	5nt	Probe design optimization	Rep1	Suppl. Fig. 1b
iAM499	HAP1	MYC	Cy3	Cy5	Design 3	5nt	Probe design optimization	Rep1	Suppl. Fig. 1b
iAM502	HAP1	MYC	Cy3	-	Design 1	5nt	Probe design optimization	Rep2	Fig. 1c
iAM503	HAP1	MYC	-	Cy5	Design 1	5nt	Probe design optimization	Rep2	Fig. 1c
iAM504	HAP1	MYC	Cy3	Cy5	Design 1	5nt	Probe design optimization	Rep2	Fig. 1c
iAM505	HAP1	MYC	Cy3	-	Design 2	5nt	Probe design optimization	Rep2	Fig. 1c
iAM506	HAP1	MYC	-	Cy5	Design 2	5nt	Probe design optimization	Rep2	Fig. 1c
iAM507	HAP1	MYC	Cy3	Cy5	Design 2	5nt	Probe design optimization	Rep2	Fig. 1c
iAM508	HAP1	MYC	Cy3	-	Design 3	5nt	Probe design optimization	Rep2	Fig. 1c
iAM509	HAP1	MYC	-	Cy5	Design 3	5nt	Probe design optimization	Rep2	Fig. 1c
iAM510	HAP1	MYC	Cy3	Cy5	Design 3	5nt	Probe design optimization	Rep2	Fig. 1c
iAM423	HAP1	MYC	Cy3	-	Design 1	5nt	Probe design optimization	Rep3	Suppl. Fig. 1d-f
iAM424	HAP1	MYC	-	Cy5	Design 1	5nt	Probe design optimization	Rep3	Suppl. Fig. 1d-f
iAM425	HAP1	MYC	Cy3	Cy5	Design 1	5nt	Probe design optimization	Rep3	Suppl. Fig. 1d-f
iAM426	HAP1	MYC	Cy3	-	Design 2	5nt	Probe design optimization	Rep3	Suppl. Fig. 1d-f
iAM427	HAP1	MYC	-	Cy5	Design 2	5nt	Probe design optimization	Rep3	Suppl. Fig. 1d-f
iAM428	HAP1	MYC	Cy3	Cy5	Design 2	5nt	Probe design optimization	Rep3	Suppl. Fig. 1d-f
iAM416_001	HAP1	MYC	Cy3	-	Design 1	5nt	Probe design optimization	Rep3	Suppl. Fig. 1d-f
iAM416_002	HAP1	MYC	-	Cy5	Design 1	5nt	Probe design optimization	Rep3	Suppl. Fig. 1d-f
iAM416_003	HAP1	MYC	Cy3	Cy5	Design 1	5nt	Probe design optimization	Rep3	Suppl. Fig. 1d-f
iAM416_004	HAP1	MYC	Cy3	-	Design 3	5nt	Probe design optimization	Rep3	Suppl. Fig. 1d-f
iAM416_005	HAP1	MYC	-	Cy5	Design 3	5nt	Probe design optimization	Rep3	Suppl. Fig. 1d-f
iAM416_006	HAP1	MYC	Cy3	Cy5	Design 3	5nt	Probe design optimization	Rep3	Suppl. Fig. 1d-f
iAM417	HAP1	MYC	Cy3	-	Design 2	5nt	Probe design optimization	Rep3	Suppl. Fig. 1d-f
iAM418	HAP1	MYC	-	Cy5	Design 2	5nt	Probe design optimization	Rep3	Suppl. Fig. 1d-f
iAM419	HAP1	MYC	Cy3	Cy5	Design 2	5nt	Probe design optimization	Rep3	Suppl. Fig. 1d-f
iAM420	HAP1	MYC	Cy3	-	Design 3	5nt	Probe design optimization	Rep3	Suppl. Fig. 1d-f
iAM421	HAP1	MYC	-	Cy5	Design 3	5nt	Probe design optimization	Rep3	Suppl. Fig. 1d-f
iAM422	HAP1	MYC	Cy3	Cy5	Design 3	5nt	Probe design optimization	Rep3	Suppl. Fig. 1d-f
iAM295_001	MEF	Ogt	Cy3	Cy5	Design 3	G1-S50	Probe design optimization	Rep1	Fig. 1d-i
iAM295_002	MEF	Ogt	Cy3	Cy5	Design 3	G1-150	Probe design optimization	Rep1	Fig. 1d-i
iAM295_003	MEF	Ogt	Cy3	Cy5	Design 3	G2-S50	Probe design optimization	Rep1	Fig. 1d-i
iAM295_004	MEF	Ogt	Cy3	Cy5	Design 3	G2-S300	Probe design optimization	Rep1	Fig. 1d-i
iAM295_005	MEF	Ogt	Cy3	Cy5	Design 3	G4-S50	Probe design optimization	Rep1	Fig. 1d-i
iAM295_006	MEF	Ogt	Cy3	Cy5	Design 3	G4-S300	Probe design optimization	Rep1	Fig. 1d-i
iAM324_001	NIH3T3	Ogt	Cy3	Cy5	Design 3	G1-S50	Probe design optimization	Rep2	Suppl. Fig. 2a-f
iAM324_002	NIH3T3	Ogt	Cy3	Cy5	Design 3	G1-150	Probe design optimization	Rep2	Suppl. Fig. 2a-f
iAM324_003	NIH3T3	Ogt	Cy3	Cy5	Design 3	G2-S50	Probe design optimization	Rep2	Suppl. Fig. 2a-f
iAM324_004	NIH3T3	Ogt	Cy3	Cy5	Design 3	G2-S300	Probe design optimization	Rep2	Suppl. Fig. 2a-f
iAM324_005	NIH3T3	Ogt	Cy3	Cy5	Design 3	G4-S50	Probe design optimization	Rep2	Suppl. Fig. 2a-f
iAM324_006	NIH3T3	Ogt	Cy3	Cy5	Design 3	G4-S300	Probe design optimization	Rep2	Suppl. Fig. 2a-f
iAM394_001	MEF	Ogt	-	Cy5	Design 3	G1-S50	Probe design optimization		Suppl. Fig. 2g-l
iAM394_002	MEF	Ogt	-	Cy5	Design 3	G1-150	Probe design optimization		Suppl. Fig. 2g-l
iAM394_003	MEF	Ogt	-	Cy5	Design 3	G2-S50	Probe design optimization		Suppl. Fig. 2g-l
iAM394_004	MEF	Ogt	-	Cy5	Design 3	G2-S300	Probe design optimization		Suppl. Fig. 2g-l
iAM394_005	MEF	Ogt	-	Cy5	Design 3	G4-S50	Probe design optimization		Suppl. Fig. 2g-l
iAM394_006	MEF	Ogt	-	Cy5	Design 3	G4-S300	Probe design optimization		Suppl. Fig. 2g-l
iAM384_20200129_001	MEF	Ogt	-	Cy5	Design 3	G1-150	Probe design optimization		Suppl. Fig. 3
iAM383_20200129_001	MEF	Ogt	Cy3	-	Design 3	G1-150	Probe design optimization		Suppl. Fig. 3
iAM382_20200129_001	MEF	Ogt	Cy3	Cy5	Design 3	G1-150	Probe design optimization		Suppl. Fig. 3
iAM388_20200130_001	MEF	Ogt	AlexaFluor488	-	Design 3	G1-150	Probe design optimization		Fig. 1j
iAM387_20200129_001	MEF	Ogt	AlexaFluor488	AlexaFluor594	Design 3	G1-150	Probe design optimization		Fig. 1j
iAM386_20200129_001	MEF	Ogt	-	AlexaFluor594	Design 3	G1-150	Probe design optimization		Fig. 1j
iAM732_20210927_001	MEF	Atp2b3	AlexaFluor488	AlexaFluor594	Design 3	G1-150	Na-Azide/2-Deoxyglucose		Fig. 3a
iAM730_20210922_001	MEF	Magix	AlexaFluor488	AlexaFluor594	Design 3	G1-150	Na-Azide/2-Deoxyglucose		Fig. 3c
iAM729_20210922_001	MEF	Magix	AlexaFluor488	AlexaFluor594	Design 3	G1-150	Control		Fig. 3c
iAM727_20210922_001	MEF	Tent5d	AlexaFluor488	AlexaFluor594	Design 3	G1-150	Control		Fig. 2f & Suppl. Fig. 4a-r
iAM724_20210921_001	MEF	Pbdc1	AlexaFluor488	AlexaFluor594	Design 3	G1-150	Na-Azide/2-Deoxyglucose		Fig. 3d
iAM723_20210921_001	MEF	Pbdc1	AlexaFluor488	AlexaFluor594	Design 3	G1-150	Control		Fig. 3d
iAM721_20210920_001	MEF	Tent5d	AlexaFluor488	AlexaFluor594	Design 3	G1-150	Control		Fig. 2f & Suppl. Fig. 4a-r
iAM717_20210918_001	MEF	Atp2b3	AlexaFluor488	AlexaFluor594	Design 3	G1-150	Na-Azide/2-Deoxyglucose		Fig. 3a
iAM716_20210918_001	MEF	Atp2b3	AlexaFluor488	AlexaFluor594	Design 3	G1-150	Control		Fig. 3a
iAM715_20210917_001	MEF	Kdm5c	AlexaFluor488	AlexaFluor594	Design 3	G1-150	Na-Azide/2-Deoxyglucose		Fig. 3b
iAM714_20210917_001	MEF	Kdm5c	AlexaFluor488	AlexaFluor594	Design 3	G1-150	Control		Fig. 3b
iAM706_20210723_001	MEF	Kdm5c	AlexaFluor488	AlexaFluor594	Design 3	G1-150	Control		Fig. 3e-j & Suppl. Fig. 5g-m
iAM698_20210721_001	MEF	Magix	AlexaFluor488	AlexaFluor594	Design 3	G1-150	Control		Fig. 3k-s & Suppl. Fig. 6
iAM694_20210720_001	MEF	Kdm5c	AlexaFluor488	AlexaFluor594	Design 3	G1-150	Control		Fig. 3e-j & Suppl. Fig. 5g-m
iAM692_20210720_001	MEF	Magix	AlexaFluor488	AlexaFluor594	Design 3	G1-150	Control		Fig. 3e-j & Suppl. Fig. 5g-m
iAM690_20210719_001	MEF	Tent5d	AlexaFluor488	AlexaFluor594	Design 3	G1-150	Control		Fig. 2f & Suppl. Fig. 4a-r
iAM688_20210719_001	MEF	Pbdc1	AlexaFluor488	AlexaFluor594	Design 3	G1-150	Control		Fig. 2e & Suppl. Fig. 4a-r
iAM686_20210719_001	MEF	Ddx3x	AlexaFluor488	AlexaFluor594	Design 3	G1-150	Control		Fig. 2b & Suppl. Fig. 4a-r
iAM684_20210715_001	MEF	Atp2b3	AlexaFluor488	AlexaFluor594	Design 3	G1-150	Control		Fig. 2a & Suppl. Fig. 4a-r & Fig. 3e-j & Suppl. Fig. 5g-m
iAM682_20210714_001	MEF	Kdm5c	AlexaFluor488	AlexaFluor594	Design 3	G1-150	Control		Fig. 2c & Fig. 3e-j & Suppl. Fig. 5g-m & Suppl. Fig. 4a-r
iAM680_20210714_001	MEF	Magix	AlexaFluor488	AlexaFluor594	Design 3	G1-150	Control		Fig. 2d & Fig. 3e-j & Suppl. Fig. 5g-m & Suppl. Fig. 4a-r
iAM660_20210531_001	MEF	Kdm5c	AlexaFluor488	AlexaFluor594	Design 3	G1-150	Control		Fig. 3e-j & Suppl. Fig. 5g-m
iAM658_20210528_001	MEF	Magix	AlexaFluor488	AlexaFluor594	Design 3	G1-150	Control		Fig. 3e-j & Suppl. Fig. 5g-m
iAM634_20210506_001	MEF	Magix	AlexaFluor488	AlexaFluor594	Design 3	G1-150	Control		Fig. 3e-j & Suppl. Fig. 5g-m
iAM632_20210506_001	MEF	Kdm5c	AlexaFluor488	AlexaFluor594	Design 3	G1-150	Control		Fig. 3e-j & Suppl. Fig. 5g-m
iAM622_20210503_001	MEF	Pbdc1	AlexaFluor488	AlexaFluor594	Design 3	G1-150	Control		Fig. 2e & Suppl. Fig. 4a-r
iAM620_20210430_001	MEF	Ddx3x	AlexaFluor488	AlexaFluor594	Design 3	G1-150	Control		Fig. 2b & Suppl. Fig. 4a-r
iAM618_20210430_001	MEF	Atp2b3	AlexaFluor488	AlexaFluor594	Design 3	G1-150	Control		Fig. 2a & Suppl. Fig. 4a-r & Fig. 3e-j & Suppl. Fig. 5g-m
iAM614_20210426_001	MEF	Ddx3x	AlexaFluor488	AlexaFluor594	Design 3	G1-150	Control		Fig. 2b & Suppl. Fig. 4a-r
iAM613_20210423_001	MEF	Pbdc1	AlexaFluor488	AlexaFluor594	Design 3	G1-150	Na-Azide/2-Deoxyglucose		Suppl. Fig. 5c-f
iAM612_20210423_001	MEF	Pbdc1	AlexaFluor488	AlexaFluor594	Design 3	G1-150	Control		Suppl. Fig. 5c-f & Fig. 2e & Suppl. Fig. 4a-r
iAM611_20210423_001	MEF	Atp2b3	AlexaFluor488	AlexaFluor594	Design 3	G1-150	Na-Azide/2-Deoxyglucose		Suppl. Fig. 5c-f
iAM610_20210423_001	MEF	Atp2b3	AlexaFluor488	AlexaFluor594	Design 3	G1-150	Control		Suppl. Fig. 5c-f & Fig. 2a & Suppl. Fig. 4a-r
iAM609_20210421_001	MEF	Click-iT RNA Imaging Kit	-	-	-	-	Na-Azide/2-Deoxyglucose		Suppl. Fig. 5
iAM608_20210421_001	MEF	Click-iT RNA Imaging Kit	-	-	-	-	Control		Suppl. Fig. 5
iAM603_20210331_001	MEF	Kdm5c	AlexaFluor488	AlexaFluor594	Design 3	G1-150	Na-Azide/2-Deoxyglucose		Suppl. Fig. 5c-f
iAM602_20210331_001	MEF	Kdm5c	AlexaFluor488	AlexaFluor594	Design 3	G1-150	Control		Suppl. Fig. 5c-f & Fig. 2c & Suppl. Fig. 4a-r & Fig. 3e-j & Suppl. Fig. 5g-m
iAM601_20210331_001	MEF	Magix	AlexaFluor488	AlexaFluor594	Design 3	G1-150	Na-Azide/2-Deoxyglucose		Suppl. Fig. 5c-f
iAM600_20210331_001	MEF	Magix	AlexaFluor488	AlexaFluor594	Design 3	G1-150	Control		Suppl. Fig. 5c-f & Fig. 2d & Suppl. Fig. 4a-r & Fig. 3e-j & Suppl. Fig. 5g-m
iAM594_20210329_001	MEF	Magix	AlexaFluor488	AlexaFluor594	Design 3	G1-150	Control		Fig. 2d & Fig. 3e-j & Suppl. Fig. 5g-m & Suppl. Fig. 4a-r
iAM583_20210218_001	MEF	Magix	AlexaFluor488	AlexaFluor594	Design 3	G1-150	Control		Fig. 3e-j & Suppl. Fig. 5g-m
iAM574_20210217_001	MEF	Kdm5c	AlexaFluor488	AlexaFluor594	Design 3	G1-150	Control		Fig. 3e-j & Suppl. Fig. 5g-m
iAM569_20210215_001	MEF	Kdm5c	AlexaFluor488	AlexaFluor594	Design 3	G1-150	Control		Fig. 3e-j & Suppl. Fig. 5g-m
iAM568_20210215_001	MEF	Magix	AlexaFluor488	AlexaFluor594	Design 3	G1-150	Control		Fig. 3e-j & Suppl. Fig. 5g-m
