# Supplementary material for: FRET-FISH probes chromatin compaction at individual genomic loci in single cells
Source: Research Square preprint supplement (doi:10.21203/rs.3.rs-1130822/v1), 2021-12-08
Supplement: Supplementary file 2 [file 9ba44c0bb7bf93dce84710eb.xlsx]

## Sheet: Suppl Table 1
Supplementary Table 1. List of oligos composing the FRET-FISH probes used in this study.
Probe name	Chr	Probe start-end coordinates	Oligo #	Oligo sequence (5'->3')
MYC	8	[hg19]chr8:127730069-127730129	1	GTCACACTTAATAAGCAGCGTTCAACACCTTGTATTCATATAAATATTATTGTGAATGGTGGTTAAGTATCTTATTTAGGCCTTATTCTGTTTAACTGGTTCGC
MYC	8	[hg19]chr8:127730134-127730194	2	CGTAGTAAGATATGTAGTCCTTCCTGCCTAACATGATGTAAACAGAAATACTACAGCTACAAAGACAAATCAGCTCATTTAATTGTGAACTTACTATCATATCC
MYC	8	[hg19]chr8:127730199-127730259	3	GTCACACTTAATAAGCAGCGTTTAACTACTAAATAATACCAAAATATGTAAGTCTTGATGAAGAAGAATAATTTTATTTATTTTATTCTGTTTAACTGGTTCGC
MYC	8	[hg19]chr8:127730264-127730324	4	CGTAGTAAGATATGTAGTCCTTAATTGAATTCATTTATTTGAATATGAGCTTAAAAATATGGAGGATAGGATTTCTAAAAATTTGTGAACTTACTATCATATCC
MYC	8	[hg19]chr8:127730329-127730389	5	GTCACACTTAATAAGCAGCGTTGCAAATTTGTGAGTTTAAATGTTGAGGACACTTAAAATTTTCTTTATAGAAAGTTTGAGTTTATTCTGTTTAACTGGTTCGC
MYC	8	[hg19]chr8:127730394-127730454	6	CGTAGTAAGATATGTAGTCCTTTGCTTGGATGTTCAGAAAAGTAACAAACTAAGCAGGGAGATAGAAGTTCTTAAAATAATTTTGTGAACTTACTATCATATCC
MYC	8	[hg19]chr8:127730459-127730519	7	GTCACACTTAATAAGCAGCGTTAAACATGAAGAAGATGGGGAGGACTAAATTAGCTAAGGGGAATGCATATAATTATGGAAGTTATTCTGTTTAACTGGTTCGC
MYC	8	[hg19]chr8:127730524-127730584	8	CGTAGTAAGATATGTAGTCCTTATTTACCTGGGATGATATTAACTTAGCTATAACTAGAGGTAAAATGTTGAGAGAAAAAAATTGTGAACTTACTATCATATCC
MYC	8	[hg19]chr8:127730589-127730649	9	GTCACACTTAATAAGCAGCGTTATGAAATAGTATGGTTTGGGTGATTTATCCTGAAAGAGAGAGAAGGGAGGCGATTGTGATTTATTCTGTTTAACTGGTTCGC
MYC	8	[hg19]chr8:127730654-127730714	10	CGTAGTAAGATATGTAGTCCTTAAAACCTTCTAGGGAATAGATTTCTAACCTCATCACGAGGGCACGGTTCGCTGAAGACAATTGTGAACTTACTATCATATCC
MYC	8	[hg19]chr8:127730719-127730779	11	GTCACACTTAATAAGCAGCGTTTGGTCCTTAGCAGCTACACCTGAGATCCCTGAGCCATGGGGCAGCAACATGCAATGGTTCTTATTCTGTTTAACTGGTTCGC
MYC	8	[hg19]chr8:127730784-127730844	12	CGTAGTAAGATATGTAGTCCTTCTTTGAATCTTCATTTCTATTGCTTTATGTTTATAAGTCACAGATTTTCAATACATCTGTTTGTGAACTTACTATCATATCC
MYC	8	[hg19]chr8:127730849-127730909	13	GTCACACTTAATAAGCAGCGTTAACTTATTGTCTGCTCTCAAAACCTCAACTTTAAAATCTGGGGTCTTGTCCAGGCACAGTTTATTCTGTTTAACTGGTTCGC
MYC	8	[hg19]chr8:127731304-127731364	14	CGTAGTAAGATATGTAGTCCTTCAATCATGTTCCTGAGAGAGTAACTAAACAATGCAAAACAAAATGAAGTAATAAAACCCTTTGTGAACTTACTATCATATCC
MYC	8	[hg19]chr8:127731369-127731429	15	GTCACACTTAATAAGCAGCGTTTACACAACTAACGTATGAACTAGTGCTAGTCCTTGCTTTAAAACATAATATAACACGGAATTATTCTGTTTAACTGGTTCGC
MYC	8	[hg19]chr8:127731434-127731494	16	CGTAGTAAGATATGTAGTCCTTGAAGTAACTTCAGTAATTGAGTACCTACTACGTGCCAGACACTGTAATGAGGATGTTCTTTTGTGAACTTACTATCATATCC
MYC	8	[hg19]chr8:127731499-127731559	17	GTCACACTTAATAAGCAGCGTTTGTCTGTCTTATTTAAATTCTGTGAAGACGATATTATTTTTTCTCCATTTTACAAGCAATTTATTCTGTTTAACTGGTTCGC
MYC	8	[hg19]chr8:127731564-127731624	18	CGTAGTAAGATATGTAGTCCTTCAAAAGCCAGATACATAATATAAAGCATGGACAGTCATAGAGTGAGTAAATGGTGGTTCTTTGTGAACTTACTATCATATCC
MYC	8	[hg19]chr8:127731629-127731689	19	GTCACACTTAATAAGCAGCGTTTCAAAACTCAGACTCTGTGCCATTATGCCATACCACTTCTCAATCTACTAAGTTCTAACATTATTCTGTTTAACTGGTTCGC
MYC	8	[hg19]chr8:127731694-127731754	20	CGTAGTAAGATATGTAGTCCTTCATATCTAAAGGAGGAAAAGATGTGTCACACTTAACATCAGAAGACAGGAGAATCAGTCATTGTGAACTTACTATCATATCC
MYC	8	[hg19]chr8:127731759-127731819	21	GTCACACTTAATAAGCAGCGTTTAGATTTATCAAGTTGAATTGCAGGAGGATGGCAGTTGTTGAATGCTGTGTCTGTCATTGTTATTCTGTTTAACTGGTTCGC
MYC	8	[hg19]chr8:127731824-127731884	22	CGTAGTAAGATATGTAGTCCTTAAATACCATGGCCAGACAAAAGTTCCATTCTAAATGATCCAATCATCCAATAGAGATAGATTGTGAACTTACTATCATATCC
MYC	8	[hg19]chr8:127731889-127731949	23	GTCACACTTAATAAGCAGCGTTGTCCTGTCATAAACCAGGCTGGGAGCAGGCTCTACACCCGCTAACCAGCAGTGCCATTGTTTATTCTGTTTAACTGGTTCGC
MYC	8	[hg19]chr8:127731954-127732014	24	CGTAGTAAGATATGTAGTCCTTATATCAAAGTTTCTATAAAGCCCATAAAGATCATGCCAATCTGAGAAATCACATGCTAAATTGTGAACTTACTATCATATCC
MYC	8	[hg19]chr8:127732019-127732079	25	GTCACACTTAATAAGCAGCGTTTCATTAATGCACCAACAATTCTAGTATATTTTTTTTTCCAAGAGAAGGTGCTAACATCCATTATTCTGTTTAACTGGTTCGC
MYC	8	[hg19]chr8:127732084-127732144	26	CGTAGTAAGATATGTAGTCCTTTTGGCCAAATGCATTTCATATTTGTAACTGTCTTGTGTTTACTTGAGCACAAGTAAAATCTTGTGAACTTACTATCATATCC
MYC	8	[hg19]chr8:127732149-127732209	27	GTCACACTTAATAAGCAGCGTTATATGTACTGACGGGAGCCAGTTTTGATTTTCTGTTTATCTCTGAGTTTGCCTTCTGGGATTATTCTGTTTAACTGGTTCGC
MYC	8	[hg19]chr8:127732214-127732274	28	CGTAGTAAGATATGTAGTCCTTAAAAGACAGGTTTCTTTTCTATCATCAAAGGTAGTGATTATAGGAAATCAAATCCAAAAGTTGTGAACTTACTATCATATCC
MYC	8	[hg19]chr8:127732279-127732339	29	GTCACACTTAATAAGCAGCGTTAATAGGAATTCATTGCTACAAGTATGTATTGAATGATGCTCATTCTGTCAACAAAGGTGTTTATTCTGTTTAACTGGTTCGC
MYC	8	[hg19]chr8:127732344-127732404	30	CGTAGTAAGATATGTAGTCCTTGCACCTATTCTATACAAATCCCTCTGAGGATACAAAAAGAAAAAGATGGACTGTGCCTTATTGTGAACTTACTATCATATCC
MYC	8	[hg19]chr8:127732409-127732469	31	GTCACACTTAATAAGCAGCGTTTTCCAGACTGCAGAAAAAGAGATGAAGACATTCACACACAAATAACTCTAATAGTGGGAATTATTCTGTTTAACTGGTTCGC
MYC	8	[hg19]chr8:127732474-127732534	32	CGTAGTAAGATATGTAGTCCTTAAAATCAGCCTCATAAAAGAAGTACACATAAAATCTAGCCTATTTGGTGTACTTGGAGTTTTGTGAACTTACTATCATATCC
MYC	8	[hg19]chr8:127732539-127732599	33	GTCACACTTAATAAGCAGCGTTGGCAGTGCATGGGTTTTGGGGTCCAAAATATCTGAGTTAGAATCCTGGCTTGGACATTTATTATTCTGTTTAACTGGTTCGC
MYC	8	[hg19]chr8:127732604-127732664	34	CGTAGTAAGATATGTAGTCCTTACATTGGGTACACAATCATGCTGAATCTCAATTTCCTGTGTGTAAAATGGTTCCAGTGGCTTGTGAACTTACTATCATATCC
MYC	8	[hg19]chr8:127732669-127732729	35	GTCACACTTAATAAGCAGCGTTTTTCACAGTCTAAGGTTTAAAGGGCAAAATGTATGCAAATTGCTTAATGCAGAGCTAGGCTTATTCTGTTTAACTGGTTCGC
MYC	8	[hg19]chr8:127732734-127732794	36	CGTAGTAAGATATGTAGTCCTTTTGCTGTTATAAAGCATGAAAAGATTCTTTTATGGAAAAGTTTCATGAAAGAAGTGACACTTGTGAACTTACTATCATATCC
MYC	8	[hg19]chr8:127732799-127732859	37	GTCACACTTAATAAGCAGCGTTCTGGGTCTTGAAGCTGGATGGAAGAAATGACATTATCAAAAGAGCAGAGATAGGAGAGCATTATTCTGTTTAACTGGTTCGC
MYC	8	[hg19]chr8:127732864-127732924	38	CGTAGTAAGATATGTAGTCCTTTACATTAAGGGAACAAAGCGGCTTAATTTCTTAGGAGTGGCATAATGATGCAGTAGGAACTTGTGAACTTACTATCATATCC
MYC	8	[hg19]chr8:127732929-127732989	39	GTCACACTTAATAAGCAGCGTTGAACTAAAGCTAAAGAGATGGCTGGATTGTTAAGGTGTATTAATTTGAATGTTGGACTAATTATTCTGTTTAACTGGTTCGC
MYC	8	[hg19]chr8:127732994-127733054	40	CGTAGTAAGATATGTAGTCCTTTTTAGACCTGGAAGTTTCCAAATGATAGCCTATAGGTCAAACCCAACCTGCCACCTGTTTTTGTGAACTTACTATCATATCC
MYC	8	[hg19]chr8:127733059-127733119	41	GTCACACTTAATAAGCAGCGTTTGGCTCATGCATAAGACGGGTTGTTATATTTTTTAAAAGTTTGGAAAAAAATAAAAAGAATTATTCTGTTTAACTGGTTCGC
MYC	8	[hg19]chr8:127733124-127733184	42	CGTAGTAAGATATGTAGTCCTTACATTTCATGAAATTCAAATTTCAGTGTTCATAAATAATGTTTTGTTTGAATGTAGTCAATTGTGAACTTACTATCATATCC
MYC	8	[hg19]chr8:127733189-127733249	43	GTCACACTTAATAAGCAGCGTTTTTTTAATATATTGTCTCTGGCTGCTTCAGCACTACAATGGCAGAAGACAGAGTTGAGTATTATTCTGTTTAACTGGTTCGC
MYC	8	[hg19]chr8:127733254-127733314	44	CGTAGTAAGATATGTAGTCCTTAACAGGCATCATCCGGCCCCCAAAGCTAAGGATATTGGCTATCTGATCATTTATGGAGCATTGTGAACTTACTATCATATCC
MYC	8	[hg19]chr8:127733319-127733379	45	GTCACACTTAATAAGCAGCGTTGCCAATCCTTGATTGAGAAGGTCTCTTGTAGGCAATGGGTCTACACTACAATTAAGGTTTTTATTCTGTTTAACTGGTTCGC
MYC	8	[hg19]chr8:127733384-127733444	46	CGTAGTAAGATATGTAGTCCTTCAGGGAGGTAATGAGCAAGGAGATGTTTACCAAATTAAATTTGCAGTTGAATTTGAGAAGTTGTGAACTTACTATCATATCC
MYC	8	[hg19]chr8:127733449-127733509	47	GTCACACTTAATAAGCAGCGTTGTCAAGAGTCTGTGACACTTCAGATGCAGGTGATATAACTGGCCAAGAATGAGGGTAGGATTATTCTGTTTAACTGGTTCGC
MYC	8	[hg19]chr8:127733514-127733574	48	CGTAGTAAGATATGTAGTCCTTAAAAAAGAAGGGGACTGTTGTATTATAGAAACACTTAAGGCAGCCGCAAGCCTGGTCATTTTGTGAACTTACTATCATATCC
MYC	8	[hg19]chr8:127733579-127733639	49	GTCACACTTAATAAGCAGCGTTTTTCTGTGTGTCTCATGTCAGCATTTTCAATTCAATTTAAAAGCCTATATTATATATTAATTATTCTGTTTAACTGGTTCGC
MYC	8	[hg19]chr8:127733644-127733704	50	CGTAGTAAGATATGTAGTCCTTTTCATCCACAAAACACCTACTCAGAGAAAGAAAGTGGGAAAGAATTCTGTTTACCCAGGGTTGTGAACTTACTATCATATCC
MYC	8	[hg19]chr8:127733709-127733769	51	GTCACACTTAATAAGCAGCGTTAAGGACCCTAATGGGCTTAGTGGCCTAGCTGGGAGCAGCAGGTTTATGATAATGGCCCAATTATTCTGTTTAACTGGTTCGC
MYC	8	[hg19]chr8:127733774-127733834	52	CGTAGTAAGATATGTAGTCCTTAGGGAGGATTGGGAGATGCTCCAAGAGTTGAATTGTCTGGCATATTTCCTTCTGCATATATTGTGAACTTACTATCATATCC
MYC	8	[hg19]chr8:127733839-127733899	53	GTCACACTTAATAAGCAGCGTTGTACTAATCCTCTAGGCAGACGTGGTATCCTGGGCTGCCACCATCCATCTTTTTTCCCCATTATTCTGTTTAACTGGTTCGC
MYC	8	[hg19]chr8:127733904-127733964	54	CGTAGTAAGATATGTAGTCCTTCAAAAATGCTTTGTGAAAGGAGGATATTTATCTCTATGGAACTGGTATAACCCTAGATGATTGTGAACTTACTATCATATCC
MYC	8	[hg19]chr8:127733969-127734029	55	GTCACACTTAATAAGCAGCGTTGAGTATTTTGGGATCAGGCGCTCAACTAAAAAGAGCCCAGTAACTAGCCCAGCTCATCTTTTATTCTGTTTAACTGGTTCGC
MYC	8	[hg19]chr8:127734034-127734094	56	CGTAGTAAGATATGTAGTCCTTCAGTGTTAAATATTTTAGAGACACCAGACACAGGGGCAGCATTAAATACAGACCATTATCTTGTGAACTTACTATCATATCC
MYC	8	[hg19]chr8:127734099-127734159	57	GTCACACTTAATAAGCAGCGTTCAGACAGAAGAAATTAGAGAAAGCTTATCAGACCGAGGTGTTTTGTTTACCACTAGTCATTTATTCTGTTTAACTGGTTCGC
MYC	8	[hg19]chr8:127734164-127734224	58	CGTAGTAAGATATGTAGTCCTTAAATTATATTTGCATTCCATACCTTTTGGAATTTTTAAGTACAACAGAGTTGCTTTCCCATTGTGAACTTACTATCATATCC
MYC	8	[hg19]chr8:127734229-127734289	59	GTCACACTTAATAAGCAGCGTTAAATGATAATAATAAGATGAACTAAGTGTCACATCAATATTTATTATTGCACAGATATTTTTATTCTGTTTAACTGGTTCGC
MYC	8	[hg19]chr8:127734294-127734354	60	CGTAGTAAGATATGTAGTCCTTATATATTTATAACACGATTGACTTTCCTTCAAAGGTTTCTGTGGGCATAACATGCATGTGTTGTGAACTTACTATCATATCC
MYC	8	[hg19]chr8:127734359-127734419	61	GTCACACTTAATAAGCAGCGTTGATATCCTCTTACTTTCTGGACTTCAAATGCTGCATTTAGTTATTTTGATAAGTGCATTATTATTCTGTTTAACTGGTTCGC
MYC	8	[hg19]chr8:127734424-127734484	62	CGTAGTAAGATATGTAGTCCTTGAACAAGTAACTTAATTTTTTTGTTGGGTAAATGTGGTTATCATGCAGCTCTGGAGGTGTTTGTGAACTTACTATCATATCC
MYC	8	[hg19]chr8:127734489-127734549	63	GTCACACTTAATAAGCAGCGTTTACAAACTGATTGCTGGATTGTAAGGAAAAGAATTATCGACTGGGCATGGTGGCTCATGCTTATTCTGTTTAACTGGTTCGC
MYC	8	[hg19]chr8:127734554-127734614	64	CGTAGTAAGATATGTAGTCCTTATCCCAGCACTTTGGGAAAGAATTATTGGCTGGGCGTGGTGGCTTACGCCTGTACTCCCATTGTGAACTTACTATCATATCC
MYC	8	[hg19]chr8:127734619-127734679	65	GTCACACTTAATAAGCAGCGTTTTGGGAGGCCGAGGTGGTGGATCACCTGAGGTCAGGAGTTCAAGACCAGCCTGGCCAACATTATTCTGTTTAACTGGTTCGC
MYC	8	[hg19]chr8:127734684-127734744	66	CGTAGTAAGATATGTAGTCCTTAAACCCTGTCTCTACTAAAAATACAAAAAATTAGCCGTGTGTGGTGGCATGCACCTGTAGTTGTGAACTTACTATCATATCC
MYC	8	[hg19]chr8:127734749-127734809	67	GTCACACTTAATAAGCAGCGTTGCTACTTGGGAGGCTGACAGGAGAATTGCTTGAACCCCAGGGGGGCAGAGGTTGCAGTGATTATTCTGTTTAACTGGTTCGC
MYC	8	[hg19]chr8:127734814-127734874	68	CGTAGTAAGATATGTAGTCCTTCATCGCGCCACTGCAATCCAGCCTGGGCGACAGAGCAAAACTCTGTCTCAAAAAAAAAAATTGTGAACTTACTATCATATCC
MYC	8	[hg19]chr8:127734879-127734939	69	GTCACACTTAATAAGCAGCGTTATTATCTGGTGATATGGCAAGTGGTTTTCTAAGTTGCAGAAATTAGCCTGTGGTTTTATATTATTCTGTTTAACTGGTTCGC
MYC	8	[hg19]chr8:127734944-127735004	70	CGTAGTAAGATATGTAGTCCTTTTTGTTCAATGCTGACTCTGCCATTTGCCAACCATTTGACTTTGGGCAAATGTAGTGTACTTGTGAACTTACTATCATATCC
MYC	8	[hg19]chr8:127735009-127735069	71	GTCACACTTAATAAGCAGCGTTGATTGGCTATTTAGCCGCCATCCCCCTTCTTCCCTCCTACAAGCACCCAGTGTTTGTTCATTATTCTGTTTAACTGGTTCGC
MYC	8	[hg19]chr8:127735074-127735134	72	CGTAGTAAGATATGTAGTCCTTGCATCTGTCATGACTCAGAGGAAAGTGGTATCATTTCTAGCTCTGGGAATGGCCCTTATTTTGTGAACTTACTATCATATCC
MYC	8	[hg19]chr8:127735139-127735199	73	GTCACACTTAATAAGCAGCGTTCATTCTAGCACATATGTCCTTGAGCAGCAGTTATTGATTTAGGAGTCATCTTATAACCTGTTATTCTGTTTAACTGGTTCGC
MYC	8	[hg19]chr8:127735204-127735264	74	CGTAGTAAGATATGTAGTCCTTTCCTAGACATCTTGAAGAGAAGAACAGATAGTTCATACCCAGGAGGAAGGAGCATTCTTCTTGTGAACTTACTATCATATCC
MYC	8	[hg19]chr8:127735269-127735329	75	GTCACACTTAATAAGCAGCGTTGCTGGACAGGAGAAAGGAAAGATTTAGCTCAGATTGTCACCATGACCCATGTGTATGAACTTATTCTGTTTAACTGGTTCGC
MYC	8	[hg19]chr8:127735334-127735394	76	CGTAGTAAGATATGTAGTCCTTGGGATACAGGTATAAGATGAAGCTGGCACTTAGGTCCTTGTATGACACCTAGGGAGAGTTTTGTGAACTTACTATCATATCC
MYC	8	[hg19]chr8:127735399-127735459	77	GTCACACTTAATAAGCAGCGTTACTGTACTCTCAGTTGCAGGTGATAACGAATATTTCCTTATGGATGGAGTTTGAATAGGGTTATTCTGTTTAACTGGTTCGC
MYC	8	[hg19]chr8:127735464-127735524	78	CGTAGTAAGATATGTAGTCCTTAGTTACTTACAACCAAAGCATTCTAGTGGATGGTTAAAATGCCTTAAGACTAAGCTCACTTTGTGAACTTACTATCATATCC
MYC	8	[hg19]chr8:127735529-127735589	79	GTCACACTTAATAAGCAGCGTTTTAAGTATCTACTTCATAGGATTTTTTTGAGGATTGATGGAGAGTAAATAATTGATTTAGTTATTCTGTTTAACTGGTTCGC
MYC	8	[hg19]chr8:127735594-127735654	80	CGTAGTAAGATATGTAGTCCTTACTCTATTTTATATTCCCCTTAGTAGACAATATAGTTCTCAGACCGAATATTAGATACTTTTGTGAACTTACTATCATATCC
MYC	8	[hg19]chr8:127735659-127735719	81	GTCACACTTAATAAGCAGCGTTTATTTGTTGATTCACAGTTTATGTGAAATCTACTCTATTTGCCAACTCTTCACTGGCTTTTTATTCTGTTTAACTGGTTCGC
MYC	8	[hg19]chr8:127735724-127735784	82	CGTAGTAAGATATGTAGTCCTTGATTTTCTCTGTGTTTCTACATTTGCTTTAGTACGTTTACCAGATTAGAGAATCATGGTGTTGTGAACTTACTATCATATCC
MYC	8	[hg19]chr8:127735789-127735849	83	GTCACACTTAATAAGCAGCGTTATCCGCTTTGAGAAATGAACACTCCCCTTACTTCCCAAGCCTCTTTCTCTTTTACTGCTTTTATTCTGTTTAACTGGTTCGC
MYC	8	[hg19]chr8:127735854-127735914	84	CGTAGTAAGATATGTAGTCCTTATCTTTAAAATAAGATGGAAAACTAGGAAACAGAGGTTATATTATTTTTCTAGCTCTAGTTTGTGAACTTACTATCATATCC
MYC	8	[hg19]chr8:127735919-127735979	85	GTCACACTTAATAAGCAGCGTTGGCTAGTCATATGAGAAGATAATTTTCACATTTTTTTTTGTTTGTCAGTGAGAATATTTTTTATTCTGTTTAACTGGTTCGC
MYC	8	[hg19]chr8:127735984-127736044	86	CGTAGTAAGATATGTAGTCCTTAGCATTGCTAGTTAGCAGCAGAGTTAACCCTACCCCCTATTTTTGGTCTTTAGTTTTGTTTTGTGAACTTACTATCATATCC
MYC	8	[hg19]chr8:127736049-127736109	87	GTCACACTTAATAAGCAGCGTTGTTTTCCCACCTTATGGGGAAAATAAACCAATAAAACAATTCTGTGAGGATAGCTCTCACTTATTCTGTTTAACTGGTTCGC
MYC	8	[hg19]chr8:127736114-127736174	88	CGTAGTAAGATATGTAGTCCTTGTTATTGTTGGTTTTACTAATTTGCAGAATGTGGTTTGTTGAGAGGGATATGTTAGTCTATTGTGAACTTACTATCATATCC
MYC	8	[hg19]chr8:127736179-127736239	89	GTCACACTTAATAAGCAGCGTTTTTAGTCTCACCCTCTACATTTTTGAGCTGTTGTCTTTATTTTTTTTGCATTAGCATTTCTTATTCTGTTTAACTGGTTCGC
MYC	8	[hg19]chr8:127736244-127736304	90	CGTAGTAAGATATGTAGTCCTTTAACCCACATCTGGGGCCTGATGGCGGGTGTGTAATTGTAATAATGTTATTACGTTTACTTTGTGAACTTACTATCATATCC
MYC	8	[hg19]chr8:127736309-127736369	91	GTCACACTTAATAAGCAGCGTTAGGCCACAGGAGCCCAGGTGGCACAGTCTTGGATGATGTCTTTAATTGCTTTGTTAAATGTTATTCTGTTTAACTGGTTCGC
MYC	8	[hg19]chr8:127736374-127736434	92	CGTAGTAAGATATGTAGTCCTTTATTTTTTAGACCTTTCATTAAGTAAGTTCTCTTTGTGATGTGCTTGTAACAATTGCCCTTTGTGAACTTACTATCATATCC
MYC	8	[hg19]chr8:127736439-127736499	93	GTCACACTTAATAAGCAGCGTTAGTAGATTTCAAAGTGCTTTCACTCTAGGGATGTTTAGAGGTGCTCTAGGGAGTCATAGATTATTCTGTTTAACTGGTTCGC
MYC	8	[hg19]chr8:127736504-127736564	94	CGTAGTAAGATATGTAGTCCTTATAAGGTAGAAATCAAAGTCGTGAGGCACCGGCTGGTGAATGCCTCCTAAGAACATATTTTTGTGAACTTACTATCATATCC
MYC	8	[hg19]chr8:127736569-127736629	95	GTCACACTTAATAAGCAGCGTTGAGCCCTCTGATAGTCATCACCAGGGTATTGGAAGTAGATTGAAGATGAAGTATCTTTGCTTATTCTGTTTAACTGGTTCGC
MYC	8	[hg19]chr8:127736634-127736694	96	CGTAGTAAGATATGTAGTCCTTTGAGTGTAAAATCATTTTTAAAAGTGCTATGGTCTGAATGTTTGCATCCCCTCAAGATTTTTGTGAACTTACTATCATATCC
MYC	8	[hg19]chr8:127736699-127736759	97	GTCACACTTAATAAGCAGCGTTTTGGTATCATAGCCCCCAAGGTATTAGGGTATTAGGAGGTGGGGCCTTTGAGAAGTGAGCTTATTCTGTTTAACTGGTTCGC
MYC	8	[hg19]chr8:127736764-127736824	98	CGTAGTAAGATATGTAGTCCTTATGGGTGGAGTCATCATGAAAGGGATTAGTGCCTTTATAAAAGAGGCCCAAGAGAGCTGTTTGTGAACTTACTATCATATCC
MYC	8	[hg19]chr8:127736829-127736889	99	GTCACACTTAATAAGCAGCGTTCCCTTCAGCCATGTGAGCACACAATGAGAAGATGGCTTTTATGAATCAGAGAGGGGGCCCTTATTCTGTTTAACTGGTTCGC
MYC	8	[hg19]chr8:127736894-127736954	100	CGTAGTAAGATATGTAGTCCTTAGACACTGAATCTACCAGCACCTTGATCTTAAACTTCTCAGCTTCCAGAACTGTACTGTGTTGTGAACTTACTATCATATCC
MYC	8	[hg19]chr8:127736959-127737019	101	GTCACACTTAATAAGCAGCGTTTACATTTGTCTTGCTCTTAATCTACCCAGTTTATATTTTGTTATAGCAGCCTGAACAGACTTATTCTGTTTAACTGGTTCGC
MYC	8	[hg19]chr8:127737024-127737084	102	CGTAGTAAGATATGTAGTCCTTCAAAAAGGTATCTGGGTGTCTGATCAAAGTGAAAGCAAGAGTTCTAGATGGATAGCAAGATTGTGAACTTACTATCATATCC
MYC	8	[hg19]chr8:127737089-127737149	103	GTCACACTTAATAAGCAGCGTTAGAGGTCTGACTGTGGAGTTCTGACTGCAGGGGACAGCATCTAACCCTTTTTCAAAATCGTTATTCTGTTTAACTGGTTCGC
MYC	8	[hg19]chr8:127737154-127737214	104	CGTAGTAAGATATGTAGTCCTTGTGACAGGCCCTGCACTAAGCCTTTAAAAAACAGTATTTCATTCAGTCCTTATAACTACCTTGTGAACTTACTATCATATCC
MYC	8	[hg19]chr8:127737219-127737279	105	GTCACACTTAATAAGCAGCGTTGTGGGTATTATCATCTCTCTTTAAGTTTTGGAGACGTAAACCAATGGGTTCAAGGTGATTTTATTCTGTTTAACTGGTTCGC
MYC	8	[hg19]chr8:127737284-127737344	106	CGTAGTAAGATATGTAGTCCTTTGTAAATAAAGAGACAAAGGATAGGACTGCCAGGCTTCAAAGCTACAATATGAGTTTTACTTGTGAACTTACTATCATATCC
MYC	8	[hg19]chr8:127737349-127737409	107	GTCACACTTAATAAGCAGCGTTCTCAACATGTTCCAAATATGAGGACTGGAGTTTGCAGGCCTCTACTCTCTGGAGTGAGAATTATTCTGTTTAACTGGTTCGC
MYC	8	[hg19]chr8:127737414-127737474	108	CGTAGTAAGATATGTAGTCCTTCAGGAGCAGTGTAGGAAATTGTACAATGCAATGGAGATATAAGGCACTATAAGGAGTTCATTGTGAACTTACTATCATATCC
MYC	8	[hg19]chr8:127737479-127737539	109	GTCACACTTAATAAGCAGCGTTAACAGAGAAACAACTTGCTTATCTAGCAGGATTTAGAGGCTAAGAGTATTCTCAATTTCTTTATTCTGTTTAACTGGTTCGC
MYC	8	[hg19]chr8:127737544-127737604	110	CGTAGTAAGATATGTAGTCCTTTTTAATATCAGTGACAGAAGCATGCTGATGTCAACTGGCCAAGTCGTTTTTGTCTATTTGTTGTGAACTTACTATCATATCC
MYC	8	[hg19]chr8:127737609-127737669	111	GTCACACTTAATAAGCAGCGTTTAAATGCCACATCCATGGTGAATGCTGTCATAGGCAATAACCTGCAATTAAAAGATAATCTTATTCTGTTTAACTGGTTCGC
MYC	8	[hg19]chr8:127737674-127737734	112	CGTAGTAAGATATGTAGTCCTTTCCTGCCCCCCTGACATAGTCCCCATTCTCATGCCTCTTCTCCAGACAACTTAGGATCTATTGTGAACTTACTATCATATCC
MYC	8	[hg19]chr8:127737739-127737799	113	GTCACACTTAATAAGCAGCGTTCCAATCTTTCTCCTTCCAGACCCCCGGCACACCAGCTATTCCATTTGCTTTCCTACATGTTTATTCTGTTTAACTGGTTCGC
MYC	8	[hg19]chr8:127737804-127737864	114	CGTAGTAAGATATGTAGTCCTTTATTTCCTTACTTCAGGCCACTTCTCTTCTAATACAAAGTGGATGTCCAGGTTCATTGACTTGTGAACTTACTATCATATCC
MYC	8	[hg19]chr8:127737869-127737929	115	GTCACACTTAATAAGCAGCGTTCTCTGTTCATTGGGCTAATTAACCTCATTACTATTCTCAGTGGCACCCCTCAATGGGTTTTTATTCTGTTTAACTGGTTCGC
MYC	8	[hg19]chr8:127737934-127737994	116	CGTAGTAAGATATGTAGTCCTTTCAGCACCAATCCATTTTCATTATTCCACATACGAAGCCAACCCATCACTGAACCAAGCTTTGTGAACTTACTATCATATCC
MYC	8	[hg19]chr8:127737999-127738059	117	GTCACACTTAATAAGCAGCGTTCTTTTCCTCCTTTGTCAGCTGGTCATAAAGTTTGAACTGATGAAAAGGCACCAGTGTAACTTATTCTGTTTAACTGGTTCGC
MYC	8	[hg19]chr8:127738064-127738124	118	CGTAGTAAGATATGTAGTCCTTTGGGTAACATGGGAAAATGGGCCACATCCTCTTGGAGCTTACTTATACCTTATGAATATATTGTGAACTTACTATCATATCC
MYC	8	[hg19]chr8:127738129-127738189	119	GTCACACTTAATAAGCAGCGTTCCCGATCCTGGATATACCATCCCATCTTATGATGGATCACTGTTGGCCTTCATGCACTTATTATTCTGTTTAACTGGTTCGC
MYC	8	[hg19]chr8:127738194-127738254	120	CGTAGTAAGATATGTAGTCCTTTTGTGAATCAATCTGGTGGAACCCAGCTCATGATAGGCATCTCTAGCCATATGGTCAGTCTTGTGAACTTACTATCATATCC
MYC	8	[hg19]chr8:127738259-127738319	121	GTCACACTTAATAAGCAGCGTTCCCATGATTAGTTGCATGGTCTCTATTAGAGCCCATTAGCACACCAAGAGGTGCTCTTTGTTATTCTGTTTAACTGGTTCGC
MYC	8	[hg19]chr8:127738324-127738384	122	CGTAGTAAGATATGTAGTCCTTTATATATTTCTCTGCTGCAAGTAGTCCACACAAAGTGGTAGACTTGGAATAAGAGGTCAATTGTGAACTTACTATCATATCC
MYC	8	[hg19]chr8:127738389-127738449	123	GTCACACTTAATAAGCAGCGTTGTCAAATAAATGAGCATATGAGAATATATCTCCCTATACCAGCAAACCAACTAGTTTATTTTATTCTGTTTAACTGGTTCGC
MYC	8	[hg19]chr8:127738454-127738514	124	CGTAGTAAGATATGTAGTCCTTTTTCAGGAAGGCTTAGAGCTCATCCTACTTACCAAAGTAATAAGAAACATGCTAGTGATATTGTGAACTTACTATCATATCC
MYC	8	[hg19]chr8:127738519-127738579	125	GTCACACTTAATAAGCAGCGTTACCAGCATCACTTGACAAGCTCAAAGGTGTCTGTCTTCTAAAAGTTACAGTTCTCATTAATTATTCTGTTTAACTGGTTCGC
MYC	8	[hg19]chr8:127738584-127738644	126	CGTAGTAAGATATGTAGTCCTTGCTGTTACAGAACTGGAATCCTTAATATCAATAAATATTGAAGTATCCCCAAATAGTGGATTGTGAACTTACTATCATATCC
MYC	8	[hg19]chr8:127738649-127738709	127	GTCACACTTAATAAGCAGCGTTGTTAATAGCACTTAAGCATAAGAGGCAAGGTAAATGTAATTACTATTAGAGGTAGCCAAGTTATTCTGTTTAACTGGTTCGC
MYC	8	[hg19]chr8:127738714-127738774	128	CGTAGTAAGATATGTAGTCCTTCTGACCAATAGAGAGTTATGTGATGGTTAATAGAACACAGTGCTCCTAGTGGCAAGAGTGTTGTGAACTTACTATCATATCC
MYC	8	[hg19]chr8:127738779-127738839	129	GTCACACTTAATAAGCAGCGTTCAGACAAGTGAGTTTCTTAATTTATACCATTACAATAAATCATGAATTGATAATCAGAAGTTATTCTGTTTAACTGGTTCGC
MYC	8	[hg19]chr8:127738844-127738904	130	CGTAGTAAGATATGTAGTCCTTAGACAACTCCACCAATTAAAAGTAATGGTTCTTTACCCCATTTCTGGTCCTGAGCCAGTTTTGTGAACTTACTATCATATCC
MYC	8	[hg19]chr8:127738909-127738969	131	GTCACACTTAATAAGCAGCGTTTCTTAGACTACATTAACTGAAGGAGAGGCCAGGTCCTCCAAGGACAGACATTCCAACATCTTATTCTGTTTAACTGGTTCGC
MYC	8	[hg19]chr8:127738974-127739034	132	CGTAGTAAGATATGTAGTCCTTAAGTGTATACAGTAATGATTCCCTTAGTTCCACAGTATAGGGACCTATGGCCTTTACTTGTTGTGAACTTACTATCATATCC
MYC	8	[hg19]chr8:127739039-127739099	133	GTCACACTTAATAAGCAGCGTTCCATACATTGAAGAAATTGGAATATCCAGAACTTCTGAGGGCTATTAGACATATCGCAGCTTATTCTGTTTAACTGGTTCGC
MYC	8	[hg19]chr8:127739104-127739164	134	CGTAGTAAGATATGTAGTCCTTGTACGATCATGGTTTATTGTTACAGTGAAAACATATGAGGACGAGGCTCTATATGAAGTCTTGTGAACTTACTATCATATCC
MYC	8	[hg19]chr8:127739169-127739229	135	GTCACACTTAATAAGCAGCGTTCTGGGTTTATCTTCGTGGCCCCATCCATTTCAGAATGTATAATTGCAATGATCATACTTGTTATTCTGTTTAACTGGTTCGC
MYC	8	[hg19]chr8:127739949-127740009	136	CGTAGTAAGATATGTAGTCCTTATTTTTCATGGCTGTGTAGTATTCCAAAATGTCATACTTCTTTCTTGACCTGTGGTATAATTGTGAACTTACTATCATATCC
MYC	8	[hg19]chr8:127740014-127740074	137	GTCACACTTAATAAGCAGCGTTATCATGCTGGAAAAGGGTGAGTGGAAGCTTATGACCTCCCCTCTCCCTGGACAAATTAGTTTATTCTGTTTAACTGGTTCGC
MYC	8	[hg19]chr8:127740079-127740139	138	CGTAGTAAGATATGTAGTCCTTAAAACCAATATTGCATCTCAGGAAGAAAGATTAATTCCTCAGTGTTTGTAACTGAGAGCATTGTGAACTTACTATCATATCC
MYC	8	[hg19]chr8:127740144-127740204	139	GTCACACTTAATAAGCAGCGTTAAAATTCTCTAGGAAGCTCTGGAGCTTAGGCAGACCCTTCAGAGTTGACATAAATTGAGGTTATTCTGTTTAACTGGTTCGC
MYC	8	[hg19]chr8:127740209-127740269	140	CGTAGTAAGATATGTAGTCCTTCGGCCAGGTGTATGTATTTCCGTACCAGCCACTCATTGACTATAGACAGTTCCTTGGGAGTTGTGAACTTACTATCATATCC
MYC	8	[hg19]chr8:127740274-127740334	141	GTCACACTTAATAAGCAGCGTTGTAACCTTAAGTGAGACAGTTTCTTGTGGCCAACGTCAATTCCCAATGAAGAAGAGAGCTTTATTCTGTTTAACTGGTTCGC
MYC	8	[hg19]chr8:127740339-127740399	142	CGTAGTAAGATATGTAGTCCTTTTCTTCATGCTAATATTCCCAACAGCTAAAGGCTAGGTGAGTTGGCCCTGCTAAGGGAATTTGTGAACTTACTATCATATCC
MYC	8	[hg19]chr8:127740404-127740464	143	GTCACACTTAATAAGCAGCGTTTGCAGCAGCAAAATGTATTTTACATAATGTCCTTCAATATATGCTAATTGCATTCCACCATTATTCTGTTTAACTGGTTCGC
MYC	8	[hg19]chr8:127740469-127740529	144	CGTAGTAAGATATGTAGTCCTTAGTTCATGATATATGAGCCAGTGCTGGTAGACAGGAAGAAATGGGCTCAGAGTAACAATGTTGTGAACTTACTATCATATCC
MYC	8	[hg19]chr8:127740534-127740594	145	GTCACACTTAATAAGCAGCGTTATTTCCATAGCAATTTATTTAAGCAACAGTTGGTACTTGTATATGCCTATTAGATACCTCTTATTCTGTTTAACTGGTTCGC
MYC	8	[hg19]chr8:127740599-127740659	146	CGTAGTAAGATATGTAGTCCTTAGTAAGAAGGCTCAGACGCTGAGTTGGGATCTAGGGTAGAACAATAGTGGAGCAGGTAGCTTGTGAACTTACTATCATATCC
MYC	8	[hg19]chr8:127740664-127740724	147	GTCACACTTAATAAGCAGCGTTGCATACACACCTCTGGCATGCCATTTCCATCTGACCTCTTCCTGCTCTAAACTGGAAAAGTTATTCTGTTTAACTGGTTCGC
MYC	8	[hg19]chr8:127740729-127740789	148	CGTAGTAAGATATGTAGTCCTTTGGATCTTGTTTACATCTTTTGCCTTTATTCCTCATGTTCTTTATCCCAAAGCTATCCCTTTGTGAACTTACTATCATATCC
MYC	8	[hg19]chr8:127740794-127740854	149	GTCACACTTAATAAGCAGCGTTTGGAATGAAACTAACAACTTAAGGTAGTCAAGAATTACGCCTCTAGAGTCAGACAGAAACTTATTCTGTTTAACTGGTTCGC
MYC	8	[hg19]chr8:127740859-127740919	150	CGTAGTAAGATATGTAGTCCTTTTGGTGTTAACTCTGCCTTTTCCAGATGGGTGAACTTGGCCAAATTTACCAAAACCTGTATTGTGAACTTACTATCATATCC
MYC	8	[hg19]chr8:127740924-127740984	151	GTCACACTTAATAAGCAGCGTTCAGTCTTCCTATCTTAGCACTGCTGTGAGAATGATTTGAGTTATACTTATTATGGCATATTTATTCTGTTTAACTGGTTCGC
MYC	8	[hg19]chr8:127740989-127741049	152	CGTAGTAAGATATGTAGTCCTTATGATTAGATTTTATTAAACATTAGTTTTATTCTTTCTACTATTATTAACATAACTGGGCTTGTGAACTTACTATCATATCC
MYC	8	[hg19]chr8:127741054-127741114	153	GTCACACTTAATAAGCAGCGTTTTTTATAGCCTCTTCCTCTCATTATGTGACTCCAAATAAAATTGGGTTAAATAGAATTCCTTATTCTGTTTAACTGGTTCGC
MYC	8	[hg19]chr8:127741119-127741179	154	CGTAGTAAGATATGTAGTCCTTCAGATTTAAAGAGCAAAAGTAGTTCCCAGAGAGCAACATATGAATGAGGAAAGAGTAGTCTTGTGAACTTACTATCATATCC
MYC	8	[hg19]chr8:127741184-127741244	155	GTCACACTTAATAAGCAGCGTTTATTTGTATAGAATGTTATCATAATCCATCATCATCATTATCACACTTACATAGCCTTGTTTATTCTGTTTAACTGGTTCGC
MYC	8	[hg19]chr8:127741249-127741309	156	CGTAGTAAGATATGTAGTCCTTACCAGGCATGGTTCTAAATGATTTTAAAATGTTTTATTTTATAATCTTAATCACAAAATATTGTGAACTTACTATCATATCC
MYC	8	[hg19]chr8:127741314-127741374	157	GTCACACTTAATAAGCAGCGTTGTAGAAACTATAATTAAATTCCTTTTTAAAATTGAGATGTTGAAGCATCTAGAGATAAAGTTATTCTGTTTAACTGGTTCGC
MYC	8	[hg19]chr8:127741379-127741439	158	CGTAGTAAGATATGTAGTCCTTTGGCCAAGATCAGGTATTTATTAAGAGGCAGAGCTGGGATCCAACTAGGGCAGGCTGGCTTTGTGAACTTACTATCATATCC
MYC	8	[hg19]chr8:127741444-127741504	159	GTCACACTTAATAAGCAGCGTTGCCCATATAGTTTATGATGCTGGTGGAAGAGGTTAAGGGGTTCACTGTCAATGTCACTGTTTATTCTGTTTAACTGGTTCGC
MYC	8	[hg19]chr8:127741509-127741569	160	CGTAGTAAGATATGTAGTCCTTCTGCCAAGTGTCTACTCTTAGTGCAGGGATCTTCCACCATGTCTTGCAAAATAATTACCTTTGTGAACTTACTATCATATCC
MYC	8	[hg19]chr8:127741574-127741634	161	GTCACACTTAATAAGCAGCGTTATTCTTAGCAAAAGGGCTGTGGGACCAGAAAGACAATGAATGTGGTGGGTCAGGGACAGTTTATTCTGTTTAACTGGTTCGC
MYC	8	[hg19]chr8:127741639-127741699	162	CGTAGTAAGATATGTAGTCCTTGTGAGGCCTTGATGACAATCCTAACTGATCAAATAACCTCATATTTTTTTTAAAAAAGTTTTGTGAACTTACTATCATATCC
MYC	8	[hg19]chr8:127741704-127741764	163	GTCACACTTAATAAGCAGCGTTTGTCCTAAATAATAGCTCAAGTAAACCAACAGAAATGAGTCCAAATTTATCCTTTTTGAATTATTCTGTTTAACTGGTTCGC
MYC	8	[hg19]chr8:127741769-127741829	164	CGTAGTAAGATATGTAGTCCTTACTCCTTGGGACCCAGTGTCTGAAGTGACTTCAAGGCCAAAAAGCGTGCAAGCAGCTGTGTTGTGAACTTACTATCATATCC
MYC	8	[hg19]chr8:127741834-127741894	165	GTCACACTTAATAAGCAGCGTTCTCTCTATATAGGAACACTATTTTTAATTCCCCCCCCTTTTATTTCTTCCCTCATGAAATTTATTCTGTTTAACTGGTTCGC
MYC	8	[hg19]chr8:127741899-127741959	166	CGTAGTAAGATATGTAGTCCTTTGGTGTCTTGGTCCATTTTGTGCTGCCACAGCAAAATGCCCAAGACTGGGTAATTTACAATTGTGAACTTACTATCATATCC
MYC	8	[hg19]chr8:127741964-127742024	167	GTCACACTTAATAAGCAGCGTTAGAAATTTATTTAATAACAGTTTTGGAGGCTGGGAAGTCGAAGCCTCTGATGAGGATTTTTTATTCTGTTTAACTGGTTCGC
MYC	8	[hg19]chr8:127742029-127742089	168	CGTAGTAAGATATGTAGTCCTTTGCATTCTCATGTGGTGAAAGGCAGAAGGGCAAAAGAAAATCAACTTCCTGTGTAAAGCTTTGTGAACTTACTATCATATCC
MYC	8	[hg19]chr8:127742094-127742154	169	GTCACACTTAATAAGCAGCGTTTTAAGGGCCTATAATCTCATCTGAGGGAGAAGCACTTATGGTTTGATCTCCTCTTAAGAGTTATTCTGTTTAACTGGTTCGC
MYC	8	[hg19]chr8:127742159-127742219	170	CGTAGTAAGATATGTAGTCCTTCCTCTTAATACTATCGCATTGGCAACCCCTGAATCTTAGAGGGGACACATTCAAATCATTTTGTGAACTTACTATCATATCC
MYC	8	[hg19]chr8:127742224-127742284	171	GTCACACTTAATAAGCAGCGTTCTGGGAAGAAAGAGACTGAACAAATTGTTACATATTTGATGAATTAATAAACCACTATTGTTATTCTGTTTAACTGGTTCGC
MYC	8	[hg19]chr8:127742289-127742349	172	CGTAGTAAGATATGTAGTCCTTATTGATATAGTAGAAAAAATTTGTATGCTTGACAATGTACAACAAGGAGATGGTAGATCTTTGTGAACTTACTATCATATCC
MYC	8	[hg19]chr8:127742354-127742414	173	GTCACACTTAATAAGCAGCGTTAGTCTTCCTCAAGGAAGTAGCATTTAAGCTGAGATCTGAAGGTTGGTAAGACATTACTAGTTATTCTGTTTAACTGGTTCGC
MYC	8	[hg19]chr8:127742419-127742479	174	CGTAGTAAGATATGTAGTCCTTTTCACCCATATATTGGAGTGAGAAAGAGAGTGGTATTTTTGAGAAAGTGCCTAGAATAGCTTGTGAACTTACTATCATATCC
MYC	8	[hg19]chr8:127742809-127742869	175	GTCACACTTAATAAGCAGCGTTAAACAAAACACATCTATTTAGGATGGAAAGAGGAAAGAAATGAGCTTATATCATACCACATTATTCTGTTTAACTGGTTCGC
MYC	8	[hg19]chr8:127742874-127742934	176	CGTAGTAAGATATGTAGTCCTTCCTTTGGAAGTCATAAGAGTTTTTACCTTTATTGTAAGTGTTGGAAATCTATGAAGGTGTTTGTGAACTTACTATCATATCC
MYC	8	[hg19]chr8:127742939-127742999	177	GTCACACTTAATAAGCAGCGTTGTGAGGGGTTACTTTAAAAATATATCAGATTTAGATTTTTAGATTTTAACTATAGCTGCATTATTCTGTTTAACTGGTTCGC
MYC	8	[hg19]chr8:127743004-127743064	178	CGTAGTAAGATATGTAGTCCTTAAGAATAGCCTGGAAGGAAACTAGAGAGGCTATGGAAGCCAAGTGAGGAGGCGATTAGACTTGTGAACTTACTATCATATCC
MYC	8	[hg19]chr8:127743069-127743129	179	GTCACACTTAATAAGCAGCGTTCAAAATGACTTGGGTTACGTGGCATGGGCAAAAGTTGAGAGATTCAATAAACAGAGATTCTTATTCTGTTTAACTGGTTCGC
MYC	8	[hg19]chr8:127743134-127743194	180	CGTAGTAAGATATGTAGTCCTTGATGATTCATTAGAGATAAAGCACAGGGAGAAGGAGGTGCCAATTCCAGCTCCCAGTTTTTTGTGAACTTACTATCATATCC
MYC	8	[hg19]chr8:127743199-127743259	181	GTCACACTTAATAAGCAGCGTTCTGAGTAACTGGTTAAGAGATGGTGCTTGTTACTGAGATCAGTGGATAGGAGACAGAAGCTTATTCTGTTTAACTGGTTCGC
MYC	8	[hg19]chr8:127743264-127743324	182	CGTAGTAAGATATGTAGTCCTTGGAGGAGTAAATCATGACATTGTATGTCTTTCTCTATGAAAGAGATTGCTGTTAATGAGATTGTGAACTTACTATCATATCC
MYC	8	[hg19]chr8:127743329-127743389	183	GTCACACTTAATAAGCAGCGTTCATGTATTCAGTTCTACATTTTATTTGGATCTTCTTATAAAAAAGATATTCTGGAGCCTATTATTCTGTTTAACTGGTTCGC
MYC	8	[hg19]chr8:127743394-127743454	184	CGTAGTAAGATATGTAGTCCTTGGAAATATTTTAAATCTCACGCTTTACGGAAAATGGTAACATTTTGATGTAACAGGAGTATTGTGAACTTACTATCATATCC
MYC	8	[hg19]chr8:127743459-127743519	185	GTCACACTTAATAAGCAGCGTTCATAAGTCATAAAATCACAGATGTTTATGACAAAAATGTTTGTATTCCCAAAAATTCCATTTATTCTGTTTAACTGGTTCGC
MYC	8	[hg19]chr8:127743524-127743584	186	CGTAGTAAGATATGTAGTCCTTGCTTTCTGTTCTACATGTCTTCCTGGATAAGCATATCTCCTCCCATGTATTCATTATCACTTGTGAACTTACTATCATATCC
MYC	8	[hg19]chr8:127743589-127743649	187	GTCACACTTAATAAGCAGCGTTTTTCAGTGATTCCCAAAATGCTTATCTCTAACTTGAAAGTCTATTGTTAGATCCAGATTCTTATTCTGTTTAACTGGTTCGC
MYC	8	[hg19]chr8:127743654-127743714	188	CGTAGTAAGATATGTAGTCCTTTCAGCTGTCTACTTGGATGTTACTCAAAGTATCTTAACCTTAGCACGTCTACAAATGAACTTGTGAACTTACTATCATATCC
MYC	8	[hg19]chr8:127743719-127743779	189	GTCACACTTAATAAGCAGCGTTATCCTTCCCCATTTACTCTTCTGTGTTTTGTATGCAGGTGAAATGATTCGCCATCTACCTTTATTCTGTTTAACTGGTTCGC
MYC	8	[hg19]chr8:127743784-127743844	190	CGTAGTAAGATATGTAGTCCTTCCTACACCAGAATCCCAAAGAATTCAAGACTCACCTTCTCTATTTCACCAACTACATCTATTGTGAACTTACTATCATATCC
MYC	8	[hg19]chr8:127744304-127744364	191	GTCACACTTAATAAGCAGCGTTTGGTTCCTAGTCAACTTTCTTAAGTATGTTTTATCTTAGCTCCCTCCTTTCCATTCCTATTTATTCTGTTTAACTGGTTCGC
MYC	8	[hg19]chr8:127744369-127744429	192	CGTAGTAAGATATGTAGTCCTTTTATTATGTCCAAAGTCTTCACCATTTATCACCTTAATGACAATGAGATTTCCCACTGATTTGTGAACTTACTATCATATCC
MYC	8	[hg19]chr8:127744434-127744494	193	GTCACACTTAATAAGCAGCGTTTTCCATATGAATTTCAGTATTTTTTTTTCTATTTCTGTGGAAAGTTCTATGTGATATTGATTATTCTGTTTAACTGGTTCGC
MYC	8	[hg19]chr8:127744499-127744559	194	CGTAGTAAGATATGTAGTCCTTATTGCATTGAATCTGTAGATTAATTTGGGTAGGATGGAGTTATTGACAATATTAAGTCTTTTGTGAACTTACTATCATATCC
MYC	8	[hg19]chr8:127744564-127744624	195	GTCACACTTAATAAGCAGCGTTCCATGAACACTGAATGCCTTTTCATTTTATTGTGTCTTCTTTCATCAATGTTTTACAGTTTTATTCTGTTTAACTGGTTCGC
MYC	8	[hg19]chr8:127744629-127744689	196	CGTAGTAAGATATGTAGTCCTTTATGCAAATCTTTAACCTCCTTGGTCAAATTTATTCATAAGTGTTTTGTTATTCTTGGTGTTGTGAACTTACTATCATATCC
MYC	8	[hg19]chr8:127745084-127745144	197	GTCACACTTAATAAGCAGCGTTCTTTATTGTTTTGTATCCTGCACCTTCACTGAATTTGTTTACTAGTTTAAACAGTTTGTTTTATTCTGTTTAACTGGTTCGC
MYC	8	[hg19]chr8:127745149-127745209	198	CGTAGTAAGATATGTAGTCCTTTTTTTTCTGGAGTCTTTAGGGTTTTCTACATTTAAGATCATGTTGTTTCCAAACAGTGACTTGTGAACTTACTATCATATCC
MYC	8	[hg19]chr8:127745214-127745274	199	GTCACACTTAATAAGCAGCGTTGATTCTTCCTTTCTGAATTGGATGCCTTTTATTATTTTATTTTTGCCCAATTCCTCTGGCTTATTCTGTTTAACTGGTTCGC
MYC	8	[hg19]chr8:127745279-127745339	200	CGTAGTAAGATATGTAGTCCTTCTTCCAGTACTACTTTGAATAGAAGTGGTAAGAGAGTGGTCATCCTTGCCTTGTTCCTCATTGTGAACTTACTATCATATCC
MYC	8	[hg19]chr8:127745344-127745404	201	GTCACACTTAATAAGCAGCGTTGAGGAAAAGCTTCTAGTTACTTACCACTAAGTATGATGGTAGCTCCGGACTTTTCACATGTTATTCTGTTTAACTGGTTCGC
MYC	8	[hg19]chr8:127745409-127745469	202	CGTAGTAAGATATGTAGTCCTTTTTATTATGTTAAGTTACTTACTGTTTATAGTTTGTTGAGAAGTTCTATCATGAAAGGGTTTGTGAACTTACTATCATATCC
MYC	8	[hg19]chr8:127745474-127745534	203	GTCACACTTAATAAGCAGCGTTTTTTTGTCAGTGTTATTCTGCATTTACCAAAATGATCATATGATATTTTTCCCTTTATTCTTATTCTGTTTAACTGGTTCGC
MYC	8	[hg19]chr8:127745539-127745599	204	CGTAGTAAGATATGTAGTCCTTAATTGGTGTATCACATTAATTGATTTTCTTATGTTGAACCATCCTTGCTTTCCAGAGATATTGTGAACTTACTATCATATCC
MYC	8	[hg19]chr8:127745604-127745664	205	GTCACACTTAATAAGCAGCGTTCACTTGGTTGTGGTGCATGATCCTTTCAATTTGCTACTGGATTAGGTTTGCTAGAATTTTTTATTCTGTTTAACTGGTTCGC
MYC	8	[hg19]chr8:127745669-127745729	206	CGTAGTAAGATATGTAGTCCTTGAATTTTTGCATCAATATTCATCACGGATATTGACCTATAGTTTTCTTTTCTTGTGGTGTTTGTGAACTTACTATCATATCC
MYC	8	[hg19]chr8:127745734-127745794	207	GTCACACTTAATAAGCAGCGTTTCTGGCTTTGGTATCAGGGTAATGCCAGCCTCATTAAATGGGTTTGGAAGTGTTACCTCTTTATTCTGTTTAACTGGTTCGC
MYC	8	[hg19]chr8:127745799-127745859	208	CGTAGTAAGATATGTAGTCCTTAAATGTTTAAAGAGTTGAGAATGATTAGAATTAACTTTTCTTTAAATGTTTGGTGGAATTTTGTGAACTTACTATCATATCC
MYC	8	[hg19]chr8:127745864-127745924	209	GTCACACTTAATAAGCAGCGTTGGGAAGTCATCTGAGTCTTGGCTTTTTTTTTTTAAGGGAGGTGGGAGATTTTTTTATTACTTATTCTGTTTAACTGGTTCGC
MYC	8	[hg19]chr8:127745929-127745989	210	CGTAGTAAGATATGTAGTCCTTTAATCTCCCTGCTGGTTATAGGTCAATTCAGACTTTCTATTTCTTCATGATTTAGTCATATTGTGAACTTACTATCATATCC
MYC	8	[hg19]chr8:127745994-127746054	211	GTCACACTTAATAAGCAGCGTTTTGTATGTTTCTAGGAATTTATCCATTTCCCCCAGCCTATACAGTTTGTTGGAACATAATTTATTCTGTTTAACTGGTTCGC
MYC	8	[hg19]chr8:127746059-127746119	212	CGTAGTAAGATATGTAGTCCTTATAGTAGTCTCATAATCTTTTTATGTTTCTGTGGTATCAGTTGTAATGTCTCCTTTTTCATTGTGAACTTACTATCATATCC
MYC	8	[hg19]chr8:127746124-127746184	213	GTCACACTTAATAAGCAGCGTTCTGGTTTTATGTATTTTTATGTATTATTTTTCTTAAGTAGTTTCACCTAAGAGTTTGTCATTATTCTGTTTAACTGGTTCGC
MYC	8	[hg19]chr8:127746189-127746249	214	CGTAGTAAGATATGTAGTCCTTGTTTATGTTTTCAAAAGAAAAAACTCTTAGACTCATTTTTTCTATTTTTTTCCCTTTTTATTGTGAACTTACTATCATATCC
MYC	8	[hg19]chr8:127746254-127746314	215	GTCACACTTAATAAGCAGCGTTTATTTCTGCCTCAGTGTCCTTTTTAATAGTGTTTGCCTATGTATGATCGAGTAGTGTCTTTTATTCTGTTTAACTGGTTCGC
MYC	8	[hg19]chr8:127746319-127746379	216	CGTAGTAAGATATGTAGTCCTTACAACCATGAAGTGGCAAAACCAGACCTTGAACTCAGGTGTATCTAATTCCAACCACTAATTGTGAACTTACTATCATATCC
MYC	8	[hg19]chr8:127746384-127746444	217	GTCACACTTAATAAGCAGCGTTCTGGATTATTTTCACTCAGGGTGGAACAAGCTTGAAAACTAGGAGGTCCAGTCAACAAGTTTATTCTGTTTAACTGGTTCGC
MYC	8	[hg19]chr8:127746449-127746509	218	CGTAGTAAGATATGTAGTCCTTGCGATGCATTCAAGCAGAGTAAGTACAGAGAAGGCCATGAGCAGGGTCAAAGGTTTCTAATTGTGAACTTACTATCATATCC
MYC	8	[hg19]chr8:127746514-127746574	219	GTCACACTTAATAAGCAGCGTTCAGAGTGTGTGTAAGAAAGAGTCTGTGTATAGTAAAGAAAGAAAATCACTAGGCCATATTTTATTCTGTTTAACTGGTTCGC
MYC	8	[hg19]chr8:127746904-127746964	220	CGTAGTAAGATATGTAGTCCTTGTTTTTGAACTTGATATTTCAAACTTGTGTCTAATAGATTTGGCCAAGTTCTGTTTTAGGTTGTGAACTTACTATCATATCC
MYC	8	[hg19]chr8:127746969-127747029	221	GTCACACTTAATAAGCAGCGTTTGGAGAATGCTGGGATTCCTCACTTTGAAGAGCTTTACAGTCTGATGTATTTCTCAGCATTTATTCTGTTTAACTGGTTCGC
MYC	8	[hg19]chr8:127747034-127747094	222	CGTAGTAAGATATGTAGTCCTTTATGATCTCAACACGTATCTCTGGGGTGAGTCTATGGAATTATAATATTACCTCTGATTGTTGTGAACTTACTATCATATCC
MYC	8	[hg19]chr8:127747099-127747159	223	GTCACACTTAATAAGCAGCGTTGGAAGCTCCCAGCACAGTGCACGCTGTACAGCAAGCCCTCAATTTGTATTTGTTCAATGATTATTCTGTTTAACTGGTTCGC
MYC	8	[hg19]chr8:127747164-127747224	224	CGTAGTAAGATATGTAGTCCTTGTTTTTAATTTACACAGGCTTGCCTGAAAGGGTAGGTGATGGTAGGTAAGGCCTTTTTGGTTGTGAACTTACTATCATATCC
MYC	8	[hg19]chr8:127747229-127747289	225	GTCACACTTAATAAGCAGCGTTAGTGGGTACACATAGATATATAATTTGGTCTCAAATTTTCTTTGCTATTTCACTTTAGGTTTATTCTGTTTAACTGGTTCGC
MYC	8	[hg19]chr8:127747294-127747354	226	CGTAGTAAGATATGTAGTCCTTGTCAGTCTAGGTTCTGGAGTGTAATTGGCAGCACCATGGGTAAGAGAGGGATAATTTCTTTTGTGAACTTACTATCATATCC
MYC	8	[hg19]chr8:127747359-127747419	227	GTCACACTTAATAAGCAGCGTTGGCAGAAAGGCATTAACTAGCAAGTAAGAGAAAAATAAGAGGACGAAGGACATTGGGAGCTTATTCTGTTTAACTGGTTCGC
MYC	8	[hg19]chr8:127747424-127747484	228	CGTAGTAAGATATGTAGTCCTTTAGGCTATCTCTAGTTTGGAAAACTCAATTTGTTTTGCAAAACCCCTGACGATACACTTTTTGTGAACTTACTATCATATCC
MYC	8	[hg19]chr8:127747489-127747549	229	GTCACACTTAATAAGCAGCGTTTTAGGCTGGAAACCCCTTATGGAAAGTGAAACCAGATAAAAATCAAAAGAGCTATAGATTTTATTCTGTTTAACTGGTTCGC
MYC	8	[hg19]chr8:127747554-127747614	230	CGTAGTAAGATATGTAGTCCTTAGAATGAGAGAAGGTGCTTATTTATTAACCTCTCTCAAGAAATACTAATATTTTGAAATGTTGTGAACTTACTATCATATCC
MYC	8	[hg19]chr8:127747619-127747679	231	GTCACACTTAATAAGCAGCGTTTGAGGTTGGCACTGTTTGGGAAGGTAATTGAAAATGTTGTGTATAAATGCACATAAATCATTATTCTGTTTAACTGGTTCGC
MYC	8	[hg19]chr8:127747684-127747744	232	CGTAGTAAGATATGTAGTCCTTTATTTCTACTTCTGGGATGTTTTTCAATGATGTTTACACATTTCAATACTTTAAAATTGATTGTGAACTTACTATCATATCC
MYC	8	[hg19]chr8:127747749-127747809	233	GTCACACTTAATAAGCAGCGTTTATTATTAAGATACACAGTTCACTGAGTTTTTACTATGTGCCAGGCCCTTTGCTGGATACTTATTCTGTTTAACTGGTTCGC
MYC	8	[hg19]chr8:127747814-127747874	234	CGTAGTAAGATATGTAGTCCTTAAATGTTAGCTGTCTTTATTTAATTCCTCAGATTAACTTACTGTCTTGAATATGATTTCCTTGTGAACTTACTATCATATCC
MYC	8	[hg19]chr8:127747879-127747939	235	GTCACACTTAATAAGCAGCGTTTTAGCCTTCTCCATAGTAATATCTCAAGCCTGCCTTCTATTTGCCAACCCCACTTCACTCTTATTCTGTTTAACTGGTTCGC
MYC	8	[hg19]chr8:127747944-127748004	236	CGTAGTAAGATATGTAGTCCTTTGTATGCATTTTGCAGAGATTTACTATGTCCAGCTGCACATCTCAACTTTCACATTTTATTTGTGAACTTACTATCATATCC
MYC	8	[hg19]chr8:127748009-127748069	237	GTCACACTTAATAAGCAGCGTTCACCCTACACCCACCTCTCATTATCCATAGCTACACCCCAGTGACATACCTAGTACCTTATTATTCTGTTTAACTGGTTCGC
MYC	8	[hg19]chr8:127748074-127748134	238	CGTAGTAAGATATGTAGTCCTTGCAATCTATTTGCCAAATGAATGACCATTTAAAAACCTTTATCTTCAACACTCCTCTTTTTTGTGAACTTACTATCATATCC
MYC	8	[hg19]chr8:127748139-127748199	239	GTCACACTTAATAAGCAGCGTTAATTCCTACTTCCCCTTCTTACTTATTTGGGAAAAAGAAATTCCTGCTTTCTCCTCTTGGTTATTCTGTTTAACTGGTTCGC
MYC	8	[hg19]chr8:127748204-127748264	240	CGTAGTAAGATATGTAGTCCTTAAATGTTCTACAAAGTTTGGGTAATTCTTCTCTACCCAATAGGCAGCCTCAGAAAATGATTTGTGAACTTACTATCATATCC
MYC	8	[hg19]chr8:127748269-127748329	241	GTCACACTTAATAAGCAGCGTTAGGGTAGAGGCATTATGGGAATTTTTTTGAAGTATAATCTGAAAAAAAACTTATAGAATGTTATTCTGTTTAACTGGTTCGC
MYC	8	[hg19]chr8:127748334-127748394	242	CGTAGTAAGATATGTAGTCCTTGAGGCCAACAGGAGAGCTAAGCATTCATTCACTGCAGGAGTCCAGAGGAGAGGAAGTAAATTGTGAACTTACTATCATATCC
MYC	8	[hg19]chr8:127748399-127748459	243	GTCACACTTAATAAGCAGCGTTAAGCCAGGGACAAGACAAAAGGACCAGTAACTTCTGCTGCTGATGTAGCTGCCACAGGGATTATTCTGTTTAACTGGTTCGC
MYC	8	[hg19]chr8:127748464-127748524	244	CGTAGTAAGATATGTAGTCCTTGCTGGTGAGGCACGTGTTTAAGTCTCAGGTTCCTTAATGCCAGATGTGTAGTCTCAGTCATTGTGAACTTACTATCATATCC
MYC	8	[hg19]chr8:127748529-127748589	245	GTCACACTTAATAAGCAGCGTTCTCATTTCTAAGCCTCAAGATGCCACATGTGCATGGTCATAGACACTTTCCTAGGATTGATTATTCTGTTTAACTGGTTCGC
MYC	8	[hg19]chr8:127748594-127748654	246	CGTAGTAAGATATGTAGTCCTTATCATTAAATTAGAGAATATTTGTAAAGTTCTTAGCACAGCACCTGGGCATGTAGTAAGTTTGTGAACTTACTATCATATCC
MYC	8	[hg19]chr8:127748659-127748719	247	GTCACACTTAATAAGCAGCGTTAGTCTATTATCAGCCCAGGAAATAACTCTACCTAACAGGTTCTGAGGCATAAAAGTAAACTTATTCTGTTTAACTGGTTCGC
MYC	8	[hg19]chr8:127748724-127748784	248	CGTAGTAAGATATGTAGTCCTTTCATTCCCTTCAAATTTATCTTCTTATGCATATATTTACTGAGTGCTTAGTATGTGCCAGTTGTGAACTTACTATCATATCC
MYC	8	[hg19]chr8:127748789-127748849	249	GTCACACTTAATAAGCAGCGTTGCACTGGACACCAAAGTCTCGGCAGGGAATAAAACGAAGTCTCCAGTCTTATGGGAATCTTTATTCTGTTTAACTGGTTCGC
MYC	8	[hg19]chr8:127748854-127748914	250	CGTAGTAAGATATGTAGTCCTTGAGGGGCCAAGATTTGAGTGCAGGAGCTACAGAAAACAAAGAAAAATCGTATATTTTATCTTGTGAACTTACTATCATATCC
MYC	8	[hg19]chr8:127748919-127748979	251	GTCACACTTAATAAGCAGCGTTGTAGTAATGAGTGCTAACACTTCAAATAAAATAGCATAAAGGTGCAGATTGAAGAAGGGGTTATTCTGTTTAACTGGTTCGC
MYC	8	[hg19]chr8:127748984-127749044	252	CGTAGTAAGATATGTAGTCCTTTTTCATTTATTTGTTTTATTCTTAAAAGTTTTAAGTAGCATGAAAATCACATTAATTTTATTGTGAACTTACTATCATATCC
MYC	8	[hg19]chr8:127749049-127749109	253	GTCACACTTAATAAGCAGCGTTTTCAAAATTGCACATGGCATAGCACTATGGGATGATTTTCAAAATTTCCCAAATTCAGATTTATTCTGTTTAACTGGTTCGC
MYC	8	[hg19]chr8:127749114-127749174	254	CGTAGTAAGATATGTAGTCCTTGCATGCATGCATTTTATTTTTAATATTCATAAAATGTTCCCATGTAATCATTTTTATACATTGTGAACTTACTATCATATCC
MYC	8	[hg19]chr8:127749179-127749239	255	GTCACACTTAATAAGCAGCGTTTTTTAAATTTACAATATTCAATATGTCAATAGTATGAAAGATATGCAGGAGAAAATGAATTTATTCTGTTTAACTGGTTCGC
MYC	8	[hg19]chr8:127749244-127749304	256	CGTAGTAAGATATGTAGTCCTTTTCCATGATGGACACCTGTCCTCTTCCCATAGGATACGGCTATCTTGGCATGTCTTCCCATTGTGAACTTACTATCATATCC
MYC	8	[hg19]chr8:127749309-127749369	257	GTCACACTTAATAAGCAGCGTTTCTATGTATGTGTTATCAGTACTTTTATTTTGGAAGTTTCTCAAAATTACAGCAAAGATGTTATTCTGTTTAACTGGTTCGC
MYC	8	[hg19]chr8:127749374-127749434	258	CGTAGTAAGATATGTAGTCCTTACAGAACAAAGACATTTTTCCTAAACCATATGAGAGTTTTCCATCCTGTGCCTTATCACTTTGTGAACTTACTATCATATCC
MYC	8	[hg19]chr8:127749439-127749499	259	GTCACACTTAATAAGCAGCGTTATTTTTTATTGCATGTTTCCCATATTTTCTACGCACAGGGCATTCTCTTATGTAACTAAATTATTCTGTTTAACTGGTTCGC
MYC	8	[hg19]chr8:127749504-127749564	260	CGTAGTAAGATATGTAGTCCTTCCCATCAAAATTAGAGTTAATGATGATACATTACTGCCATCCAATTTGTGCGTGTGTGATTTGTGAACTTACTATCATATCC
MYC	8	[hg19]chr8:127749569-127749629	261	GTCACACTTAATAAGCAGCGTTAAAAAAATTTATTTCAATAGCTTTTGGGGTAAAAGTGGTTTTTTTTGTTACATAGATGAATTATTCTGTTTAACTGGTTCGC
MYC	8	[hg19]chr8:127749634-127749694	262	CGTAGTAAGATATGTAGTCCTTTAGTGGTGAATTCTGAGATTTTAGTGCACCTGTCACCAAGCAGTGTACACTGTTCCTAATTTGTGAACTTACTATCATATCC
MYC	8	[hg19]chr8:127749699-127749759	263	GTCACACTTAATAAGCAGCGTTGTTTTTTAATTCCTAGCCTCCCTTCTACCCTTCTACCCTTCTCCTTCTGAGTCTCTAAAATTATTCTGTTTAACTGGTTCGC
MYC	8	[hg19]chr8:127749764-127749824	264	CGTAGTAAGATATGTAGTCCTTTATATCACTCTGTATGCCTTTGCATCCTCATAGCTTAGCTCCCAGGTATAAGTGAGTGATTTGTGAACTTACTATCATATCC
MYC	8	[hg19]chr8:127749829-127749889	265	GTCACACTTAATAAGCAGCGTTACTCCCATGTTACTGCACTTGGAATAATGGCCTTCAGTCCATCCAATTTGCTTCAAAAGATTATTCTGTTTAACTGGTTCGC
MYC	8	[hg19]chr8:127749894-127749954	266	CGTAGTAAGATATGTAGTCCTTTTTTGTCCATTTTTATGCCTGAGTAATATTCCATGGTGTATGTATAGCACATTTTCTTTATTGTGAACTTACTATCATATCC
MYC	8	[hg19]chr8:127749959-127750019	267	GTCACACTTAATAAGCAGCGTTTCATTAGCCAATGTGCATTTATGTTTGTTCCACATCTTTACAATTATGAATTGTGTGGCTTTATTCTGTTTAACTGGTTCGC
MYC	8	[hg19]chr8:127750024-127750084	268	CGTAGTAAGATATGTAGTCCTTCATATGTGTATAAGTGTCTTTTTCATATAATGACTTCTTTTCCTTCAGGTAAATATCCAGTTGTGAACTTACTATCATATCC
Ogt_G50_S2	X	[mm10]chrX:101675009-101675069	1	GCGGCTCTTATATACTACCGCGTGACAGTGTAAGACAAAAGTATGGGATTTTCTAATAAAGACTATAGTTGTCCCTCAGTACGAGATTAGTTCTTTAGCG
Ogt_G50_S2	X	[mm10]chrX:101675072-101675132	2	GCGGCTCTTATATACTACCGAGGAGATTCTTAGGAGAAGAGGTTCTTTGGAGAGTAGTAATTGACATTTACCTGGGAGAGACGAGATTAGTTCTTTAGCG
Ogt_G50_S2	X	[mm10]chrX:101675356-101675416	3	GCGGCTCTTATATACTACCGTGGTTTGGTTTTTGTGAGACAGGATCTGGCTATTTAGCCCAGACTATTCTAAAGCTTCACCGCAGATTTACCATTAGTCG
Ogt_G50_S2	X	[mm10]chrX:101675419-101675479	4	GCGGCTCTTATATACTACCGTCTCCTGCCCTTTCAGTATCTTGACTGAAGCAAGAATTTTTTGTTAAGGCATTTAGTTCTCGCAGATTTACCATTAGTCG
Ogt_G50_S2	X	[mm10]chrX:101675530-101675590	5	GCGGCTCTTATATACTACCGAGGTCATAAAAGACCTACCTGCCTACAAATTTGAGGCCACTCTGGACTATATATATAGCAACGAGATTAGTTCTTTAGCG
Ogt_G50_S2	X	[mm10]chrX:101675597-101675657	6	GCGGCTCTTATATACTACCGGGCAACCCAAAGCTACTTGAGACCCTGTCTTAAACAAACAAAAAAAGAAAGGCCAAGTCTACGAGATTAGTTCTTTAGCG
Ogt_G50_S2	X	[mm10]chrX:101675705-101675765	7	GCGGCTCTTATATACTACCGTTGAAACCATTTATATTGGGGGTGGGGAGGAGGAGGAGGAGAGGGAGAGAAAGAGGTGAGCGCAGATTTACCATTAGTCG
Ogt_G50_S2	X	[mm10]chrX:101675768-101675828	8	GCGGCTCTTATATACTACCGGCGAGCGAGTGAGTATTGGGTCAGAAGAAAGAAGAGTATGTGTGTCAAGCACAGGACCTTCGCAGATTTACCATTAGTCG
Ogt_G50_S2	X	[mm10]chrX:101675876-101675936	9	GCGGCTCTTATATACTACCGGGCCTGTCCCCCTTTTGGAAAGGCTTTTGTCAGTGGGGTTCTCATATAGCCCTGGCTAGCACGAGATTAGTTCTTTAGCG
Ogt_G50_S2	X	[mm10]chrX:101675939-101675999	10	GCGGCTCTTATATACTACCGAAACACTGATTTTTGGTCCTCCAACATCTATGTCCTGAGTGCTAGAATTATAGGTAAGTAACGAGATTAGTTCTTTAGCG
Ogt_G50_S2	X	[mm10]chrX:101676057-101676117	11	GCGGCTCTTATATACTACCGTGGCAAGCCCTATAGCAGCTAAACTACACCTACAACCCCCTTAGCCTGTGTTAACTCTAACGCAGATTTACCATTAGTCG
Ogt_G50_S2	X	[mm10]chrX:101676124-101676184	12	GCGGCTCTTATATACTACCGCATTATGCTCTTTTCATTATTCTAGATTAATAATAAGGCTGCAACCGGAGAGGAAGTTCCCGCAGATTTACCATTAGTCG
Ogt_G50_S2	X	[mm10]chrX:101676218-101676278	13	GCGGCTCTTATATACTACCGGGGCTACCAGAAGATGCCATTGTGTACTGTAACTTTAATCAGTTATATAAAATTGACCCAACGAGATTAGTTCTTTAGCG
Ogt_G50_S2	X	[mm10]chrX:101676281-101676341	14	GCGGCTCTTATATACTACCGACCCTGCAGATGTGGGCAAATGTGAGTATGTGTAGGTTTATTATTAATGCCCATTAATGAACGAGATTAGTTCTTTAGCG
Ogt_G50_S2	X	[mm10]chrX:101676575-101676635	15	GCGGCTCTTATATACTACCGTTAGTAGTAGTATTTGTTGGTGGTGGTCTGTGTGTGATGTGTTTATTCATGTGTACTCCTCGCAGATTTACCATTAGTCG
Ogt_G50_S2	X	[mm10]chrX:101676638-101676698	16	GCGGCTCTTATATACTACCGTGCATAAATACAACCAACTCAGTCTGTATGCCTGTATTGTTGTTTTTGAGATGAGGTCACCGCAGATTTACCATTAGTCG
Ogt_G50_S2	X	[mm10]chrX:101676746-101676806	17	GCGGCTCTTATATACTACCGTGTATTCATTCTACTTCTAACTCCTAAGTGCTGGGAATTAATCCAGGATTCCCTTCATGCACGAGATTAGTTCTTTAGCG
Ogt_G50_S2	X	[mm10]chrX:101676809-101676869	18	GCGGCTCTTATATACTACCGGCAAGTAACTGTACCAACTGAGCTATGTTCACAGTCATTTTCAGTTTGTATTTTACCTTCACGAGATTAGTTCTTTAGCG
Ogt_G50_S2	X	[mm10]chrX:101677451-101677511	19	GCGGCTCTTATATACTACCGGTGTGTTAGAAATTAAACCCAGGTTTTCAGGAAGAGCAGCCAATGTGAATGCATGTTGGTCGCAGATTTACCATTAGTCG
Ogt_G50_S2	X	[mm10]chrX:101677514-101677574	20	GCGGCTCTTATATACTACCGCCACATGTATACTTGGTACCCATGAAGGACAGAAATGGGCATTGATCCCTTGGAACTGGACGCAGATTTACCATTAGTCG
Ogt_G50_S2	X	[mm10]chrX:101677623-101677683	21	GCGGCTCTTATATACTACCGGAGTTTGTGGCCAGCCTGGGAAACTTAATGAGATCCCTTAAAAACAAAAATATGGGAGACACGAGATTAGTTCTTTAGCG
Ogt_G50_S2	X	[mm10]chrX:101677688-101677748	22	GCGGCTCTTATATACTACCGCACAGCCCCACCCCTCCCTGAGGAACTATTGGGAATAATTGTTACTGGGAAATGGAGAGTACGAGATTAGTTCTTTAGCG
Ogt_G50_S2	X	[mm10]chrX:101678500-101678560	23	GCGGCTCTTATATACTACCGATTGTTGGTGCGTGCCACAGTGCCAGAACATGTGGTTTTAGGGACTTTGTGAGCTCTTGGCGCAGATTTACCATTAGTCG
Ogt_G50_S2	X	[mm10]chrX:101678563-101678623	24	GCGGCTCTTATATACTACCGGCTCTGCCAATAGGTAGGACTACATCACAAGACCCCAAGTGTACTTTCCAATGGAAAGAGCGCAGATTTACCATTAGTCG
Ogt_G50_S2	X	[mm10]chrX:101678688-101678748	25	GCGGCTCTTATATACTACCGCCTTTTTTTTTTTTTTTAAAGATTCTGAAACGTGTGCCTAACAGCGTGCTTTGGCTGTTGACGAGATTAGTTCTTTAGCG
Ogt_G50_S2	X	[mm10]chrX:101678751-101678811	26	GCGGCTCTTATATACTACCGTTTCCAGCAGTAGGAGAACCCAATATTCAACAATATGCACAAAATATGGGCCTTCCCCAGACGAGATTAGTTCTTTAGCG
Ogt_G50_S2	X	[mm10]chrX:101678859-101678919	27	GCGGCTCTTATATACTACCGAGAGGTCAGCTGGCTGATGTCTGCCTGGATACTCCTTTGTGTAATGGACACACCACAGGGCGCAGATTTACCATTAGTCG
Ogt_G50_S2	X	[mm10]chrX:101678922-101678982	28	GCGGCTCTTATATACTACCGGATGTTCTCTGGGCAGGAACACCCATGGTGACTATGCCAGGTTAGTGGCTGATAAAATCACGCAGATTTACCATTAGTCG
Ogt_G50_S2	X	[mm10]chrX:101679029-101679089	29	GCGGCTCTTATATACTACCGGGGGATATTTGAAGGTTAACTTGTATGGAGTAGAAGTAATTAAGGCAGGGTGATAGAAAAACGAGATTAGTTCTTTAGCG
Ogt_G50_S2	X	[mm10]chrX:101679092-101679152	30	GCGGCTCTTATATACTACCGGACTTATTCAAGCCTGAATACTTGGCACCATCCTCTCCATCTGTAATGTGTGGATATTTAACGAGATTAGTTCTTTAGCG
Ogt_G50_S2	X	[mm10]chrX:101679200-101679260	31	GCGGCTCTTATATACTACCGAATTACTATCTTTTTACTTTCTAGGAGAGACTCTTGCCTCTCGAGTTGCAGCTTCTCAGCCGCAGATTTACCATTAGTCG
Ogt_G50_S2	X	[mm10]chrX:101679263-101679323	32	GCGGCTCTTATATACTACCGCTTGTCTAGGATGTCTCGAGCTCATTGCTAAAAGCAGACAGGAATATGAAGACATAGCTGCGCAGATTTACCATTAGTCG
Ogt_G50_S2	X	[mm10]chrX:101679720-101679780	33	GCGGCTCTTATATACTACCGCGTTCAGGATATTTAAGGGCTTTATTACACAGAGAAACCCTCTCTGGGAAAACCAAACCAACGAGATTAGTTCTTTAGCG
Ogt_G50_S2	X	[mm10]chrX:101679787-101679847	34	GCGGCTCTTATATACTACCGTTGTATATTTTTATCCTACAGTATATCCAGAACACAATTTCTCCTCACTCCATTCCTGCCACGAGATTAGTTCTTTAGCG
Ogt_G50_S2	X	[mm10]chrX:101679886-101679946	35	GCGGCTCTTATATACTACCGTCTCTGTGAACATGGCACAGTAAGACTAGGCATGAACCCAGAACAGGCAAAAGAGTGAGACGCAGATTTACCATTAGTCG
Ogt_G50_S2	X	[mm10]chrX:101679949-101680009	36	GCGGCTCTTATATACTACCGACCCCACTCCTGTTGTCTCACAAGAACACCAGGTTATACAACCATATTATACATGCAAAGCGCAGATTTACCATTAGTCG
Ogt_G50_S2	X	[mm10]chrX:101681066-101681126	37	GCGGCTCTTATATACTACCGCTACTTTTTAAGGTATGGCGAACATTTGACCACAGAGTGAGCCTTAGTGGTTTGTATGTAACGAGATTAGTTCTTTAGCG
Ogt_G50_S2	X	[mm10]chrX:101681129-101681189	38	GCGGCTCTTATATACTACCGGCATACATAAGCACAGGTCACGACACCAAAACAATCAAGTCAGGACAGCTTTCAGGAGTTACGAGATTAGTTCTTTAGCG
Ogt_G50_S2	X	[mm10]chrX:101681247-101681307	39	GCGGCTCTTATATACTACCGCCTTACTCACTGAGCCATCTCACCAGCCCAATACTTATATTTGAGGTAATCTATCCATCCCGCAGATTTACCATTAGTCG
Ogt_G50_S2	X	[mm10]chrX:101681314-101681374	40	GCGGCTCTTATATACTACCGCACACACACACACACACACACACACACACACACATATATATATGGGGCCAGACTTGGTGGCGCAGATTTACCATTAGTCG
Ogt_G50_S2	X	[mm10]chrX:101681587-101681647	41	GCGGCTCTTATATACTACCGGGGCTCTATGTGCACATACAAACACATGCATACACGCCCAAGTACACAAATAGAGCTCATACGAGATTAGTTCTTTAGCG
Ogt_G50_S2	X	[mm10]chrX:101681654-101681714	42	GCGGCTCTTATATACTACCGTTTTTCTTTGAAAGGAAACAATATGAATATGGTTGAGTCGAGTCCAATTGATGGACAGCCACGAGATTAGTTCTTTAGCG
Ogt_G50_S2	X	[mm10]chrX:101681775-101681835	43	GCGGCTCTTATATACTACCGAAGGTTTTATTTGGCTTAGGTATCCATATCACAGCCCACCATGAAGGCATGCCAAGGCAACGCAGATTTACCATTAGTCG
Ogt_G50_S2	X	[mm10]chrX:101681838-101681898	44	GCGGCTCTTATATACTACCGCCTGGAAGCAAGAACTGAAGCAGAAAATACAACAAAGGAGCTCCTGCCTAGAGCTGTCACCGCAGATTTACCATTAGTCG
Ogt_G50_S2	X	[mm10]chrX:101681932-101681992	45	GCGGCTCTTATATACTACCGAAGAAAGTGTCCCACAGACATGCCCACAGACAAGTTTGATGGACGTAGTTTTTCACTTGAACGAGATTAGTTCTTTAGCG
Ogt_G50_S2	X	[mm10]chrX:101681995-101682055	46	GCGGCTCTTATATACTACCGTCCCTCTTCCCAGATGACTTTAGTTTGTGTTAAGTTGACAGGCTAATTGGAAAAAGTATAACGAGATTAGTTCTTTAGCG
Ogt_G50_S2	X	[mm10]chrX:101682103-101682163	47	GCGGCTCTTATATACTACCGGGTGCTGAGTTTTCTGATTTGTAAATTTGGTTCTCTTTGTTTTTACCACCTAGCCTGAAGCGCAGATTTACCATTAGTCG
Ogt_G50_S2	X	[mm10]chrX:101682166-101682226	48	GCGGCTCTTATATACTACCGATTCGTGGCAAAGTCTGGAAACAGAGAATATCTAGCCCTCTGTTCAACACCAAACAATACCGCAGATTTACCATTAGTCG
Ogt_G50_S2	X	[mm10]chrX:101682274-101682334	49	GCGGCTCTTATATACTACCGGCTGGCAACAAACCTGACCACATGATTAAGCCTGTTGAAGTCACCGAGTCAGCCTGAATAACGAGATTAGTTCTTTAGCG
Ogt_G50_S2	X	[mm10]chrX:101682337-101682397	50	GCGGCTCTTATATACTACCGACTGCGCACAGGAGAATTGCCCTATACCTGAGCCTCAACCTTCTGGGGGAAGGGAACTAGACGAGATTAGTTCTTTAGCG
Ogt_G50_S2	X	[mm10]chrX:101682451-101682511	51	GCGGCTCTTATATACTACCGAATGATAATAGAATAGCACATTCAGACTTACTTCCTGCATGATAGGGAGAGACAAGAAAGCGCAGATTTACCATTAGTCG
Ogt_G50_S2	X	[mm10]chrX:101682514-101682574	52	GCGGCTCTTATATACTACCGAAATGCTATTCCACAAGGAATCTCTTAGAGTTTTGCAGCAAACAGGTGGTGCACAGGTCTCGCAGATTTACCATTAGTCG
Ogt_G50_S2	X	[mm10]chrX:101682793-101682853	53	GCGGCTCTTATATACTACCGGCTTCCTGTTTTAGTGTCTGAACTCTGACAGGGTGACAGGGACCTTGCTGGTGTAGTCTTACGAGATTAGTTCTTTAGCG
Ogt_G50_S2	X	[mm10]chrX:101682857-101682917	54	GCGGCTCTTATATACTACCGTAGGTTTTATAAACCACATGAGCCTATATCAGTCATTTTAGTGTCTGACCTAATGCTTGGACGAGATTAGTTCTTTAGCG
Ogt_G50_S2	X	[mm10]chrX:101682965-101683025	55	GCGGCTCTTATATACTACCGTTTACACACCCCAGCTCCCGTTAAATTCTCCTGTGACTGCTAACAAACCCATGTCTGCTTCGCAGATTTACCATTAGTCG
Ogt_G50_S2	X	[mm10]chrX:101683028-101683088	56	GCGGCTCTTATATACTACCGGACATCCCAGGGTGTTTCTCTCGAACATGCCATCTGGTGCCAAATGAAAATTCTTAGGAGCGCAGATTTACCATTAGTCG
Ogt_G50_S2	X	[mm10]chrX:101683134-101683194	57	GCGGCTCTTATATACTACCGTAATATAGGGTTTTTTTCTGCCTAAGTTTTACCTGTTTCACCAGTGTTTCAGCCCTTGACACGAGATTAGTTCTTTAGCG
Ogt_G50_S2	X	[mm10]chrX:101683197-101683257	58	GCGGCTCTTATATACTACCGCCCTCCTATGCTGCTTCCAAAAGTAATAGTGTGATAAGATTTTTACCTTCCTTTCTAAAGACGAGATTAGTTCTTTAGCG
Ogt_G50_S2	X	[mm10]chrX:101683476-101683536	59	GCGGCTCTTATATACTACCGATTCGGCCTTGGTAGGGAATTGTACCACCACTTGGTTTGGACTACAAATTAAACATTGGCCGCAGATTTACCATTAGTCG
Ogt_G50_S2	X	[mm10]chrX:101683539-101683599	60	GCGGCTCTTATATACTACCGCGCGGAGCTTGAGTTCTTCATGGTAGAAAACAGTTGCATTTCCGTAAAGGGTGGAGGGCTCGCAGATTTACCATTAGTCG
Ogt_G50_S2	X	[mm10]chrX:101683647-101683707	61	GCGGCTCTTATATACTACCGCTCTCCACTCACAGATAAGTCTTGTCTGTTAGTAGTGCTGTAGATTAAGTCTTTCCAAAGACGAGATTAGTTCTTTAGCG
Ogt_G50_S2	X	[mm10]chrX:101683710-101683770	62	GCGGCTCTTATATACTACCGCTAGGCAGTGCACCTATTCTGTAGTTGCAGCTATTGCCTGAATGTACCTTAGCTGACAAAACGAGATTAGTTCTTTAGCG
Ogt_G50_S2	X	[mm10]chrX:101684496-101684556	63	GCGGCTCTTATATACTACCGCCACTAAGGAGAAACAGAGTCCCATTCTGAGGATTATGCATATCCAGCAAGTATATTAATCGCAGATTTACCATTAGTCG
Ogt_G50_S2	X	[mm10]chrX:101684559-101684619	64	GCGGCTCTTATATACTACCGGAGCTGGAACTCCAGCCTATGTAGTACATTCTTTATATGGACTTGGTTTTTTTTTAGGTACGCAGATTTACCATTAGTCG
Ogt_G50_S2	X	[mm10]chrX:101684675-101684735	65	GCGGCTCTTATATACTACCGAGCTTTTTCAGAAACATAAAAGGGAAATATTTGGAACTGGAGAGATTGCATAGCAGTTGGACGAGATTAGTTCTTTAGCG
Ogt_G50_S2	X	[mm10]chrX:101684742-101684802	66	GCGGCTCTTATATACTACCGGGGTGCACTTCCGGAGGCCCCAGGTTCGGTTCCCAACATCTACTTGGCAAACTATTCCAGACGAGATTAGTTCTTTAGCG
Ogt_G50_S2	X	[mm10]chrX:101690867-101690927	67	GCGGCTCTTATATACTACCGTTCGATAAACTTTGCAACTGAAACCTAATTTCAAAGCAAAGTGAGGGCACAATGATAGTGCGCAGATTTACCATTAGTCG
Ogt_G50_S2	X	[mm10]chrX:101690930-101690990	68	GCGGCTCTTATATACTACCGTATTCACAATGCTGGCAGTCAGCCCAGTTGGCTGTCCTCAGTAACCCTACACCCTTTTGCCGCAGATTTACCATTAGTCG
Ogt_G50_S2	X	[mm10]chrX:101691037-101691097	69	GCGGCTCTTATATACTACCGGAGAGCAATCTTTCCTCGCTGACTTAAAAGTCAGATTAACTAAAATGCCTACAATGTAAGACGAGATTAGTTCTTTAGCG
Ogt_G50_S2	X	[mm10]chrX:101691100-101691160	70	GCGGCTCTTATATACTACCGCTTTTAAGGAAAGTAGAATGTCAAACCCAAGAGCCTGGTAATTCCAGTGAAGTCCTTCAGACGAGATTAGTTCTTTAGCG
Ogt_G50_S2	X	[mm10]chrX:101691556-101691616	71	GCGGCTCTTATATACTACCGTGCCTTCACGCCACTGTCGTGAGCCTTCATTCCAGGCCACATAGACAAACAGGGCCAGAACGCAGATTTACCATTAGTCG
Ogt_G50_S2	X	[mm10]chrX:101691619-101691679	72	GCGGCTCTTATATACTACCGCATGAACAGCAACAACAGCAACAATTGCGGCATAAAAATAGCTGTCTCTATTAGACATTCCGCAGATTTACCATTAGTCG
Ogt_G50_S2	X	[mm10]chrX:101691719-101691779	73	GCGGCTCTTATATACTACCGCAAGCCGATAGGAACCGTGATCATTAAAGCTGTGAAGAACAGCAGTGTCTTCAGGGTTGCACGAGATTAGTTCTTTAGCG
Ogt_G50_S2	X	[mm10]chrX:101691782-101691842	74	GCGGCTCTTATATACTACCGTAAAGAGTTTTCATTTCTGAACTCTGGAGGCTGCAGCGCATTCAGCGCTGCTTTATCAAGACGAGATTAGTTCTTTAGCG
Ogt_G50_S2	X	[mm10]chrX:101691890-101691950	75	GCGGCTCTTATATACTACCGGCGGAGGCTCAGCGGCGGCTAACAGGGTGACAGTCTATCAGCTGTTTTCTTTACCTACTTCGCAGATTTACCATTAGTCG
Ogt_G50_S2	X	[mm10]chrX:101691953-101692013	76	GCGGCTCTTATATACTACCGTGTACCTCCAAAGCCCTAACATGGATTCGTTTGTTAGAATCTGGGTACTGTGAGTCACAACGCAGATTTACCATTAGTCG
Ogt_G50_S2	X	[mm10]chrX:101692078-101692138	77	GCGGCTCTTATATACTACCGGACAGGAGAATTACCAGAGGTTCAAGGACATCCCAGGTTAAATAGTGAAAGCCTGTCTTAACGAGATTAGTTCTTTAGCG
Ogt_G50_S2	X	[mm10]chrX:101692141-101692201	78	GCGGCTCTTATATACTACCGAAATAAGATGGTATGGGAGGAGTGGTTGGCTTCCTCGTTAGTTATACAGTGGTGGGATGAACGAGATTAGTTCTTTAGCG
Ogt_G50_S2	X	[mm10]chrX:101692249-101692309	79	GCGGCTCTTATATACTACCGCACCTCTTTCATCTTTGGCTCCTCCCGCATTCAAAGAATTGCCTGACAGGTAAATTTCTACGCAGATTTACCATTAGTCG
Ogt_G50_S2	X	[mm10]chrX:101692312-101692372	80	GCGGCTCTTATATACTACCGCCTCTGAACTGCCTGTCATTTAACTTTTTGTGTGTAGATTTTAAACAGGATTTCGTGTAGCGCAGATTTACCATTAGTCG
Ogt_G50_S2	X	[mm10]chrX:101692938-101692998	81	GCGGCTCTTATATACTACCGATGGTCAAACTCCCAGTGGCCAGCCCCTTAAAGAGTGAGTCTTTTCTCATCACAACTCCTACGAGATTAGTTCTTTAGCG
Ogt_G50_S2	X	[mm10]chrX:101693001-101693061	82	GCGGCTCTTATATACTACCGAGAAGCCCTCAATTGTGGAGCACTGCATACACTTCAGCATCCTTATCACAAGTTTTAAGTACGAGATTAGTTCTTTAGCG
Ogt_G50_S2	X	[mm10]chrX:101693103-101693163	83	GCGGCTCTTATATACTACCGTGTGGTGGGATAGAGTGGTTTCTTATACCTACCATTGACCAAGCCAGCTCAGTCAGTCAACGCAGATTTACCATTAGTCG
Ogt_G50_S2	X	[mm10]chrX:101693166-101693226	84	GCGGCTCTTATATACTACCGGGCCTCGAGCGCAGGAATGAGGATTGAAAAGAAAAAGACAATTAGACAACATTATAAAATCGCAGATTTACCATTAGTCG
Ogt_G50_S2	X	[mm10]chrX:101693286-101693346	85	GCGGCTCTTATATACTACCGTTCTCTGTACTAGCAGTCAATAGGGTCAGTTCTCAGATCAAAGGCAAAGTGATTAAACAAACGAGATTAGTTCTTTAGCG
Ogt_G50_S2	X	[mm10]chrX:101693349-101693409	86	GCGGCTCTTATATACTACCGAAAGAACAAAGAGGTCACACCAGGTAGCAATCAAACAAAGCAAGTCACTCTGGGGGCTTAACGAGATTAGTTCTTTAGCG
Ogt_G50_S2	X	[mm10]chrX:101693469-101693529	87	GCGGCTCTTATATACTACCGTGCAACAGCCCAGATGTGAATATTCTTATCTGAGACTACTTCTTCCTCCAGAGCCCAGTGCGCAGATTTACCATTAGTCG
Ogt_G50_S2	X	[mm10]chrX:101693533-101693593	88	GCGGCTCTTATATACTACCGGTACTTGCCAAATTTTTATAAGCAGCAAATTGCTATAAGCGGCACCACATACCATTTAGACGCAGATTTACCATTAGTCG
Ogt_G50_S2	X	[mm10]chrX:101693641-101693701	89	GCGGCTCTTATATACTACCGATGGAGAAGGGAGAAAGTTACCCATTTATTAGTTCAGGAAGCTATTCATTCGTTGGCAATACGAGATTAGTTCTTTAGCG
Ogt_G50_S2	X	[mm10]chrX:101693704-101693764	90	GCGGCTCTTATATACTACCGGTAAGGAATAGTACAGCTTGGAACTAGCGCTGTTAAAAATCAAGTTCTAGCTATGCCACTACGAGATTAGTTCTTTAGCG
Ogt_G50_S2	X	[mm10]chrX:101693817-101693877	91	GCGGCTCTTATATACTACCGTTTATGTGTATAAGTGCACACGAACCCCATACACACATGTCCATAAACCATGCCTGAGCTCGCAGATTTACCATTAGTCG
Ogt_G50_S2	X	[mm10]chrX:101693884-101693944	92	GCGGCTCTTATATACTACCGAGGCCCAAAAAGGGTGTCGGATCCCCTGGACCTGGAGTTATAGAGTAGTGATTGGCCATGCGCAGATTTACCATTAGTCG
Ogt_G50_S2	X	[mm10]chrX:101693992-101694052	93	GCGGCTCTTATATACTACCGCTTAACCACTGAGCATCTCTTCGACCCTACCTATTTTAATTTTTAAGAGATATACGCATGACGAGATTAGTTCTTTAGCG
Ogt_G50_S2	X	[mm10]chrX:101694055-101694115	94	GCGGCTCTTATATACTACCGTATGTATCTGTGTGTGTGGAGGCCACAAATTACTCTCCATCTTTTTAGGTCACTGTTTTGACGAGATTAGTTCTTTAGCG
Ogt_G50_S2	X	[mm10]chrX:101694163-101694223	95	GCGGCTCTTATATACTACCGGGTCCCTGGACTTGGGGTCTGAATTTCTATGTTCATGCTTGTTCAATGAGCATTTTAATTCGCAGATTTACCATTAGTCG
Ogt_G50_S2	X	[mm10]chrX:101694228-101694288	96	GCGGCTCTTATATACTACCGACCATCTTCCCTGACCCTAACATTGAATCTTTAATTCTTTAGAAACAAGACGACTTTTGCCGCAGATTTACCATTAGTCG
Ogt_G50_S2	X	[mm10]chrX:101694671-101694731	97	GCGGCTCTTATATACTACCGGAAATAAACATCTCTCCAGCCCCTCACCTACTTTTTTCTTTCCCGAGACAGGTTTCACTAACGAGATTAGTTCTTTAGCG
Ogt_G50_S2	X	[mm10]chrX:101694734-101694794	98	GCGGCTCTTATATACTACCGGGCTGTTCTGGAACTCACTATGCAGACTCAATAGAGTCTGCCTCCCTCTACTTCTCAAATACGAGATTAGTTCTTTAGCG
Ogt_G50_S2	X	[mm10]chrX:101694849-101694909	99	GCGGCTCTTATATACTACCGCCCACACAGAACACCTAGAACAATACGTAACACCTAAAAGCAAATGCATGGGATGTTTCTCGCAGATTTACCATTAGTCG
Ogt_G50_S2	X	[mm10]chrX:101694916-101694976	100	GCGGCTCTTATATACTACCGGGTGTGGCAAAAAAAAAGAAAATAATAATTGTGAAGTATATAGGTGTCTGCCAGGGGAAGCGCAGATTTACCATTAGTCG
Ogt_G50_S2	X	[mm10]chrX:101695024-101695084	101	GCGGCTCTTATATACTACCGGGAAGTTTAAAGTAACCAACTTTTTTTTTTCTCCAGGGTCTGACAGTTCTTGAGGCCAGCACGAGATTAGTTCTTTAGCG
Ogt_G50_S2	X	[mm10]chrX:101695087-101695147	102	GCGGCTCTTATATACTACCGATAGTTCTTTGTCGCTAGATGTTTTTCCGTTGCTCCTCCTTTCTCTCATCTAGGGGTCTAACGAGATTAGTTCTTTAGCG
Ogt_G50_S2	X	[mm10]chrX:101695524-101695584	103	GCGGCTCTTATATACTACCGGGCCGGCCTGGTCTACACAGACCAGATCTCAAAAACAAAATGGATGCGTGGGTTGCTTGACGCAGATTTACCATTAGTCG
Ogt_G50_S2	X	[mm10]chrX:101695587-101695647	104	GCGGCTCTTATATACTACCGCTTTACCCGTTAGTGGCAGATTCGGACTTGAGTTACAACTCTATATTCAAATGGCGCACTCGCAGATTTACCATTAGTCG
Ogt_G50_S2	X	[mm10]chrX:101695695-101695755	105	GCGGCTCTTATATACTACCGCACAAATTCATAATTCTAGAATTCAAATTTGCCTTATGATCATGCGTGGTAGGTGGGGGCACGAGATTAGTTCTTTAGCG
Ogt_G50_S2	X	[mm10]chrX:101695758-101695818	106	GCGGCTCTTATATACTACCGAAAGGCGGGAACACGTCAGTTCCCATGGTCCCTGGGGGCACTGCCCTATAAAAGGCGCGGACGAGATTAGTTCTTTAGCG
Ogt_G50_S2	X	[mm10]chrX:101695866-101695926	107	GCGGCTCTTATATACTACCGACCTTCTGCCAGGCCAGATCAGACCGGACCAGACGCGGACCCGGACACGGGAGAACAGGTCGCAGATTTACCATTAGTCG
Ogt_G50_S2	X	[mm10]chrX:101695929-101695989	108	GCGGCTCTTATATACTACCGCAAATGGGCCTTCGGTTCTGTGTGGGAACTTGGCAACCTTCGGACCGTTTTCCCACACAGCGCAGATTTACCATTAGTCG
Ogt_G50_S2	X	[mm10]chrX:101696037-101696097	109	GCGGCTCTTATATACTACCGGATGCGAAGCCCTTGAGAAGCTCTTGAGGAACTGGGGTGCCGGGCGGGACGCGGACAACCACGAGATTAGTTCTTTAGCG
Ogt_G50_S2	X	[mm10]chrX:101696100-101696160	110	GCGGCTCTTATATACTACCGAGTCACCGAGTGGGGTGATCTTCAGAGAGTCTCGAGACGGTCGTGAGGATGCTGGGGCGGACGAGATTAGTTCTTTAGCG
Ogt_G50_S2	X	[mm10]chrX:101696208-101696268	111	GCGGCTCTTATATACTACCGACTTGAGACGACGGTCGTGAGGATGGGGGGCGGACAGGGCTGATGGCAGACTGGTAGACGCGCAGATTTACCATTAGTCG
Ogt_G50_S2	X	[mm10]chrX:101696271-101696331	112	GCGGCTCTTATATACTACCGGAGTTGGGGTGGTTTTTGAGACTTGAGACGACGGTCGTGAGGATGGGGGGCGGACAGGGCCGCAGATTTACCATTAGTCG
Ogt_G50_S2	X	[mm10]chrX:101696370-101696430	113	GCGGCTCTTATATACTACCGAGACTTGAGACGACGGTCGTGAGGATGGGGGGCGGACAGGGCTGATGGCGGACTGGTAGAACGAGATTAGTTCTTTAGCG
Ogt_G50_S2	X	[mm10]chrX:101696433-101696493	114	GCGGCTCTTATATACTACCGCGGAGTGAGGTGGTTTTGAGACTTGAGACGACGGTCGTGAGGATGGGGGGCGGACAGGGCACGAGATTAGTTCTTTAGCG
Ogt_G50_S2	X	[mm10]chrX:101696556-101696616	115	GCGGCTCTTATATACTACCGGGATGGGGGGCGGACAGGGCTGATGGCGGACTGGTAGACGCCGGAGTGAGGTGGTTTTGACGCAGATTTACCATTAGTCG
Ogt_G50_S2	X	[mm10]chrX:101696620-101696680	116	GCGGCTCTTATATACTACCGTGAGACGACGGTCGTGAGGATGTGGGGGCGGACAGGGCTGATGGCGGACTGGTAGACGCCCGCAGATTTACCATTAGTCG
Ogt_G50_S2	X	[mm10]chrX:101696728-101696788	117	GCGGCTCTTATATACTACCGGGGCGGACAGGGCTGATGGCGGACTGGTAGACGCCGGAGTGAGGTGGTTTTGAGACTTGAACGAGATTAGTTCTTTAGCG
Ogt_G50_S2	X	[mm10]chrX:101696791-101696851	118	GCGGCTCTTATATACTACCGGACGGTCGTGAGGATGTGGGGGCGGACAGGGCCGATGGCGGCACTCGAGTGGGGTGGTTTACGAGATTAGTTCTTTAGCG
Ogt_G50_S2	X	[mm10]chrX:101696899-101696959	119	GCGGCTCTTATATACTACCGCTTGAGTCTTGAGATGGTCGTGGGGTTGCGGGGGCAGACATGGCCGATGGCCGTCGGTTACGCAGATTTACCATTAGTCG
Ogt_G50_S2	X	[mm10]chrX:101696962-101697022	120	GCGGCTCTTATATACTACCGGGCGGAGGAGGATAGGTGGTCTTGAGAAGGGCGCGAGGAAGGCAGCGGCTGAGGAAGGGGCGCAGATTTACCATTAGTCG
Ogt_G50_S2	X	[mm10]chrX:101697068-101697128	121	GCGGCTCTTATATACTACCGGGGCACAGACTACAGGTGACAGAGAAGGCCGAGGCAGGGTGGTGATGGGCGCCGGAAAAAACGAGATTAGTTCTTTAGCG
Ogt_G50_S2	X	[mm10]chrX:101697131-101697191	122	GCGGCTCTTATATACTACCGGAGGGGTGGCGGGACACGAGCGGCGGAGAAAGCCGAGGGGTGGCGGGACACGGGCGCGGGACGAGATTAGTTCTTTAGCG
Ogt_G50_S2	X	[mm10]chrX:101697231-101697291	123	GCGGCTCTTATATACTACCGGGGTGGCGGGACACGGGCGCCGGAGAAAGCTGAGGGGGGGCGGGACACGGGCGCCGGAAACGCAGATTTACCATTAGTCG
Ogt_G50_S2	X	[mm10]chrX:101697297-101697357	124	GCGGCTCTTATATACTACCGAGGGGGGGGCGGGACACGGGCGCGGGAAAAAGCCAAGGGGGGTTGGGACACAGGCGCGGGCGCAGATTTACCATTAGTCG
Ogt_G50_S2	X	[mm10]chrX:101697395-101697455	125	GCGGCTCTTATATACTACCGAGCCGAGGGGGGGAGGCGCCGGAAAAAGCCGAGGGGTGTCGGGACACGAGTGGCAGAAAAACGAGATTAGTTCTTTAGCG
Ogt_G50_S2	X	[mm10]chrX:101697459-101697519	126	GCGGCTCTTATATACTACCGGAAGAGGGTGGGACACGCGACGGAAAAGCCTTGGGGTGGCGGGACGCGGGCGCGGGCGCGACGAGATTAGTTCTTTAGCG
Ogt_G50_S2	X	[mm10]chrX:101697567-101697627	127	GCGGCTCTTATATACTACCGGTCGGGACACAGGCGCCGGAAAAAGCCGAGGGGTTCCGCGGGACACGAGCGACGGAAAAACGCAGATTTACCATTAGTCG
Ogt_G50_S2	X	[mm10]chrX:101697630-101697690	128	GCGGCTCTTATATACTACCGGAGGGGTGGCGGGACAGGGGCGCGGGAAAAAGCCGAGGGGGGCGCAGGACACGGGCGACGCGCAGATTTACCATTAGTCG
Ogt_G50_S2	X	[mm10]chrX:101697738-101697798	129	GCGGCTCTTATATACTACCGTGGGACACGCGACGGAAAAGCCTAGGGGTGGCGGGACGCCGGCAACGGAAAAAGCCGAGGACGAGATTAGTTCTTTAGCG
Ogt_G50_S2	X	[mm10]chrX:101697801-101697861	130	GCGGCTCTTATATACTACCGGGCGGGACACGGGCGCGGGAAAAAGCCGAGGGGGGTGCTCGGGACACGAGCGCGGGAAAAACGAGATTAGTTCTTTAGCG
Ogt_G50_S2	X	[mm10]chrX:101697922-101697982	131	GCGGCTCTTATATACTACCGAAAAGCCGAGGGGTTCCGCGGGACACGGGCGACGGAAAAAGCCGAGGCGGGTGGGACACGCGCAGATTTACCATTAGTCG
Ogt_G50_S2	X	[mm10]chrX:101697985-101698045	132	GCGGCTCTTATATACTACCGCGGAAAAGGCCGAGTCTGGGACAGGGACAACGGTGGCTTGGAACCTAGTCTTGTGCCTAGCGCAGATTTACCATTAGTCG
Ogt_G50_S2	X	[mm10]chrX:101698093-101698153	133	GCGGCTCTTATATACTACCGGGAGGCCACAGCTTCGTGGAGATGTCCCAAGAGGGTAGAAATGTTGCTGTGTTGGCGGGGACGAGATTAGTTCTTTAGCG
Ogt_G50_S2	X	[mm10]chrX:101698156-101698216	134	GCGGCTCTTATATACTACCGGGGACTACTTGGTAAATTGAGGCTTAGGGTGTCAGACCAAGGGAACAGTTAGGACGACCAACGAGATTAGTTCTTTAGCG
Ogt_G50_S2	X	[mm10]chrX:101698264-101698324	135	GCGGCTCTTATATACTACCGTCGAAGCCTGATTGGTGGAAGCTCCCAGAGGTGAGGAGCGCAGTTACGTTTCTCGAAAATCGCAGATTTACCATTAGTCG
Ogt_G50_S2	X	[mm10]chrX:101698327-101698387	136	GCGGCTCTTATATACTACCGAGAAAATGGCGGCAGCTCTTGGGATGGGACGCAGGATCTCACAGGAATGTTGGAGAAGCCCGCAGATTTACCATTAGTCG
Ogt_G50_S2	X	[mm10]chrX:101698435-101698495	137	GCGGCTCTTATATACTACCGGCGCAGTAAGAGGGGCTGTCGCGAGGCCTCCTGTGGCTCCCTCTTGCGGCGGGTCCCGGAACGAGATTAGTTCTTTAGCG
Ogt_G50_S2	X	[mm10]chrX:101698498-101698558	138	GCGGCTCTTATATACTACCGGCTCGCTCGTTGAGGCTAGGCCAGACTAGAGTGAGCTCAGAAAGACTCCCCCCCTCCCCCACGAGATTAGTTCTTTAGCG
Ogt_G50_S2	X	[mm10]chrX:101698598-101698658	139	GCGGCTCTTATATACTACCGTCGGCTGCAGGGGTGACTTCAGCTGTGGCTGTCACACCATAAGAGCAGCTTTAGGGAGAACGCAGATTTACCATTAGTCG
Ogt_G50_S2	X	[mm10]chrX:101698661-101698721	140	GCGGCTCTTATATACTACCGGGGTTGAGCAAAAAACTACTCATGTTGAAATAAAGCTTGAAGTGGATTAAGGATCCACTACGCAGATTTACCATTAGTCG
Ogt_G50_S2	X	[mm10]chrX:101698941-101699001	141	GCGGCTCTTATATACTACCGGCGTGCGCCACCACCACCTGGCTTTTTTTTTTTTTTTTTTGACTTTTTCTTAATCTACAAACGAGATTAGTTCTTTAGCG
Ogt_G50_S2	X	[mm10]chrX:101699004-101699064	142	GCGGCTCTTATATACTACCGGTAAATATTTGGGGGATTTTTTGGGGGAGAGTCTCTCTAACACAGCTGGACCAGAGTTTCACGAGATTAGTTCTTTAGCG
Ogt_G50_S2	X	[mm10]chrX:101699112-101699172	143	GCGGCTCTTATATACTACCGAGATTTCCAAATTCTGAGATGACAGCATGCAACACCACACTCACCTTTTTTAAAAGAGTACGCAGATTTACCATTAGTCG
Ogt_G50_S2	X	[mm10]chrX:101699175-101699235	144	GCGGCTCTTATATACTACCGTATAGGGGTTGGGATGTAGCTCAGTTGATAAGAGTATCTGCCTACTCTGCATCAAACCCTCGCAGATTTACCATTAGTCG
Ogt_G50_S2	X	[mm10]chrX:101699286-101699346	145	GCGGCTCTTATATACTACCGGTAATCCCAGTCCTTAAGAGGGGAAAGAGGGAGGAGGATAAAAACTTCAAGGTCATCTTCACGAGATTAGTTCTTTAGCG
Ogt_G50_S2	X	[mm10]chrX:101699352-101699412	146	GCGGCTCTTATATACTACCGATGAGGGTTTAAAGCCAGCCAGGATCTAATCTAAGACATTATCTTTATTTTGGTTTGTGGACGAGATTAGTTCTTTAGCG
Ogt_G50_S2	X	[mm10]chrX:101699474-101699534	147	GCGGCTCTTATATACTACCGTGCATTTCAGAAACTGGTTGTTCCCGACATTGATACCTTATGGACTATGTTGTTGGTAGCCGCAGATTTACCATTAGTCG
Ogt_G50_S2	X	[mm10]chrX:101699541-101699601	148	GCGGCTCTTATATACTACCGTTAAAAATCTCTTTTTCTCTCTCTAGTTATTTTCTGAACATGGATTCAGGCAGCAGCAGCCGCAGATTTACCATTAGTCG
Ogt_G50_S2	X	[mm10]chrX:101699649-101699709	149	GCGGCTCTTATATACTACCGAGTGGCAGCACCAGTGGCAGCAGCACCACCAGCAGCAGCAGCAGCAGCAGCAGCAGCAGCACGAGATTAGTTCTTTAGCG
Ogt_G50_S2	X	[mm10]chrX:101699712-101699772	150	GCGGCTCTTATATACTACCGAGCAGCAGCAGCAGCAGCAGTAAAGAATGTGAGTAGACTGATTATGGGATGGATCCCCGGACGAGATTAGTTCTTTAGCG
Ogt_G50_S2	X	[mm10]chrX:101700531-101700591	151	GCGGCTCTTATATACTACCGAGACACTTGGCTTGATTTGGTCCTAGCTTTGACCCCTCTTGTGTTCTGTCAGGGTTGTTACGCAGATTTACCATTAGTCG
Ogt_G50_S2	X	[mm10]chrX:101700594-101700654	152	GCGGCTCTTATATACTACCGCTTCGTTCCCTGCTTTAAAGAGCAGGGGAAGATCTTCATGTTTCCCTTTTGTGTTGTTTACGCAGATTTACCATTAGTCG
Ogt_G50_S2	X	[mm10]chrX:101700702-101700762	153	GCGGCTCTTATATACTACCGGTCTTTCATTCTTTTGTCTCTTCTATTTCCATCCCCCCTTTGTCTATTTATTGCTGGACAACGAGATTAGTTCTTTAGCG
Ogt_G50_S2	X	[mm10]chrX:101700765-101700825	154	GCGGCTCTTATATACTACCGAGTCTAAGGTAAGTAAGTACTCTACAACTGACCTATGTCCCCAGTCTTAGGGAAACTTAAACGAGATTAGTTCTTTAGCG
Ogt_G50_S2	X	[mm10]chrX:101702969-101703029	155	GCGGCTCTTATATACTACCGGTTGTGGCTTAACAGTGATATGTTTGTGTCAAGTTGACACAAGGGGTCAGAGTGAGAACCCGCAGATTTACCATTAGTCG
Ogt_G50_S2	X	[mm10]chrX:101703036-101703096	156	GCGGCTCTTATATACTACCGTGTGACTCTGCACTCTTATACAAATGTGTCTCAAAGTTGATGAAAATGATAATCCTCCTGCGCAGATTTACCATTAGTCG
Ogt_G50_S2	X	[mm10]chrX:101703147-101703207	157	GCGGCTCTTATATACTACCGGCCCAGTTTATTCTCAGTACCTGACAGATGCCTCCTTTTGGAAGTTTGCAAGAGGAGGAAACGAGATTAGTTCTTTAGCG
Ogt_G50_S2	X	[mm10]chrX:101703214-101703274	158	GCGGCTCTTATATACTACCGTAGAGAGATGGGAAAATCAGGAATAATTGAAAGATAGAGTCATTTTCAATGAAGGGGGACACGAGATTAGTTCTTTAGCG
Ogt_G50_S2	X	[mm10]chrX:101703493-101703553	159	GCGGCTCTTATATACTACCGCTCTGTTTAGAGAAACAACTGAGCTCTGAAGCCTTATTACATGTGGTAGTTTTAGAATCACGCAGATTTACCATTAGTCG
Ogt_G50_S2	X	[mm10]chrX:101703556-101703616	160	GCGGCTCTTATATACTACCGTCTGCAAACTTTAAGTTTCTTATGCTTTCATATCCAGTGCCACCATTTCTTTCTCCATCACGCAGATTTACCATTAGTCG
Ogt_G50_S2	X	[mm10]chrX:101703664-101703724	161	GCGGCTCTTATATACTACCGTAACACAGTTGCCACTCTTTCTGCTGCCTTTGACTCTGGATAGAATTCTATCCATCTAGAACGAGATTAGTTCTTTAGCG
Ogt_G50_S2	X	[mm10]chrX:101703727-101703787	162	GCGGCTCTTATATACTACCGGTGCTCCTCCCTCTTCCTTTTTTACCATCCTTTAGAGGTAGGAATGACAAGGAAGAGGAGACGAGATTAGTTCTTTAGCG
Ogt_G50_S2	X	[mm10]chrX:101703831-101703891	163	GCGGCTCTTATATACTACCGGTGAACAGTGCCAACTACTATCTCCATATATTATTGTACAAGGTAGTGGGTTCCAAAAGTCGCAGATTTACCATTAGTCG
Ogt_G50_S2	X	[mm10]chrX:101703894-101703954	164	GCGGCTCTTATATACTACCGGTCAGGCCACAACTGACTAAATAAACAAGTTGCTAAGCTAGAGAACTTTAACTTTTGAGACGCAGATTTACCATTAGTCG
Ogt_G50_S2	X	[mm10]chrX:101704173-101704233	165	GCGGCTCTTATATACTACCGTGTCCAAGTACTCAACCACTTTTAGTTTAATTTGTGCTCAATATCCTGCCGATGTCTGTAACGAGATTAGTTCTTTAGCG
Ogt_G50_S2	X	[mm10]chrX:101704237-101704297	166	GCGGCTCTTATATACTACCGGAGTGAACAGGAGTGTATTTATAGATGTCTCTTGAATTTCAGATGAGACTTCTGACATTGACGAGATTAGTTCTTTAGCG
Ogt_G50_S2	X	[mm10]chrX:101704345-101704405	167	GCGGCTCTTATATACTACCGATGATGGCAGCCCTGATTTGAAGAATACTAAGCAGAAAAGTGATGAGCCCCAAATGTCGGCGCAGATTTACCATTAGTCG
Ogt_G50_S2	X	[mm10]chrX:101704408-101704468	168	GCGGCTCTTATATACTACCGTTGAAAAAGAGGGGGTTGAATGTATTGGTTCTGACTCGACTTCACCTCATGATGTTTGTGCGCAGATTTACCATTAGTCG
Ogt_G50_S2	X	[mm10]chrX:101704509-101704569	169	GCGGCTCTTATATACTACCGGAGCTTGAGCCAGAGGGGGAGCCTGAATCAGAGGCCAAGGGGGAGCCTGAATCAGAGGCCACGAGATTAGTTCTTTAGCG
Ogt_G50_S2	X	[mm10]chrX:101704572-101704632	170	GCGGCTCTTATATACTACCGGGGGAGCCCGAATCTGAGGCCAAGGGGGAGCCCGAATCTGAGGCCAAGGGGGAGTCCGAAACGAGATTAGTTCTTTAGCG
Ogt_G50_S2	X	[mm10]chrX:101704680-101704740	171	GCGGCTCTTATATACTACCGTCTGAAGCCAAGGGGGAGATGGAGACTGAGGCCAAGGGGGAGTCCGAATCTGAAGCCAAGCGCAGATTTACCATTAGTCG
Ogt_G50_S2	X	[mm10]chrX:101704747-101704807	172	GCGGCTCTTATATACTACCGTGGAGACTGAGGCCAAGGGGGAGCCCGAATCTGAAGCCAAGGGGGAGATGGAGACTGAGGCGCAGATTTACCATTAGTCG
Ogt_G50_S2	X	[mm10]chrX:101704864-101704924	173	GCGGCTCTTATATACTACCGAGTCCGAATCTGAAGCCAAGGGGGAGATGGAGACTGAGGCCAAGGGGGAGTCCGAATCTGACGAGATTAGTTCTTTAGCG
Ogt_G50_S2	X	[mm10]chrX:101704930-101704990	174	GCGGCTCTTATATACTACCGAGGGGGAGATGGAGACTGAGGCCAAGGGGGAGCCCGAATCTGAAGCCAAGGGGGAGATGGACGAGATTAGTTCTTTAGCG
Ogt_G50_S2	X	[mm10]chrX:101705040-101705100	175	GCGGCTCTTATATACTACCGCCCGAGGCTGCTAAGGGGGAGATGGAGACTGAGGCTGCTATGGGGGAGGTGGAGACTGAGCGCAGATTTACCATTAGTCG
Ogt_G50_S2	X	[mm10]chrX:101705103-101705163	176	GCGGCTCTTATATACTACCGGCTATGGGGGAGCCCGAGCAAGAAATTACAGCTGAGGAAGCCAAAAAGAAAAGGGCTGCACGCAGATTTACCATTAGTCG
Ogt_G50_S2	X	[mm10]chrX:101705211-101705271	177	GCGGCTCTTATATACTACCGTGTATGTCATCAAGTAAGCCTCGTAGGAAACGCCGTAGGGCTGACCCACAGGATGGGGCTACGAGATTAGTTCTTTAGCG
Ogt_G50_S2	X	[mm10]chrX:101705274-101705334	178	GCGGCTCTTATATACTACCGCCACAGGATGGGGCTGACCCACAGGATCGGGCTGACCCACAGGATCTGGCTGACCCACAGACGAGATTAGTTCTTTAGCG
Ogt_G50_S2	X	[mm10]chrX:101705382-101705442	179	GCGGCTCTTATATACTACCGGAGCCCATTCCATCGGGCCAGCCTGTTTGTCCCCGAAAAGGCATGGCTTCAAGTAGAGGACGCAGATTTACCATTAGTCG
Ogt_G50_S2	X	[mm10]chrX:101705445-101705505	180	GCGGCTCTTATATACTACCGGGCAGGGGCAGAGGCAGAGGCAGAGGCAGAGGCAGAGGCAGAGGCAGAGGCAGAGGCAGACGCAGATTTACCATTAGTCG
Ogt_G50_S2	X	[mm10]chrX:101706244-101706304	181	GCGGCTCTTATATACTACCGAAAAAAGACTAGGTTTGACTTAGAAATTGAGTGAAGGTGCTGCTGGGGATATGGACTTTAACGAGATTAGTTCTTTAGCG
Ogt_G50_S2	X	[mm10]chrX:101706307-101706367	182	GCGGCTCTTATATACTACCGGCCTCGTGGATAGTTAGTTGATCCATGAGGGCAAAGGGCCTGGGGGTGGGGTTCAGAAGCACGAGATTAGTTCTTTAGCG
Ogt_G50_S2	X	[mm10]chrX:101706425-101706485	183	GCGGCTCTTATATACTACCGTGAGGCTTATAAAATTTTGAGGGGCTGTGGGTAGAAACATCCATGATGGACAAAGGTCATCGCAGATTTACCATTAGTCG
Ogt_G50_S2	X	[mm10]chrX:101706492-101706552	184	GCGGCTCTTATATACTACCGAGGCTTAAAGCACCAAAATGCCTCATTAGCGTGAGGAAGCATTTCAGGAATCTCAGATACCGCAGATTTACCATTAGTCG
Ogt_G50_S2	X	[mm10]chrX:101706594-101706654	185	GCGGCTCTTATATACTACCGCTTTAATCTAACTAAGGCTACATGACATTCCTCAGGTAGAGGCATGTCTCGGAGCTTAGAACGAGATTAGTTCTTTAGCG
Ogt_G50_S2	X	[mm10]chrX:101706657-101706717	186	GCGGCTCTTATATACTACCGCCTCAAACAAGGGCAGAGAAGAAGCCCTGCCAGTGAAGGGAGTCCTCCAGATTGCCCCGAACGAGATTAGTTCTTTAGCG
Ogt_G50_S2	X	[mm10]chrX:101706765-101706825	187	GCGGCTCTTATATACTACCGACCCTATACCAATCTTTAGACTGCACTTGTCTTAGATGCTCAGGCAACCTAGCCTCCAAGCGCAGATTTACCATTAGTCG
Ogt_G50_S2	X	[mm10]chrX:101706828-101706888	188	GCGGCTCTTATATACTACCGCCTTATGAAAATTCTCTGTACCTGTGACAGTCTTACTGGTGACCCTAGATGGAGCCATTCCGCAGATTTACCATTAGTCG
Ogt_G50_S2	X	[mm10]chrX:101706936-101706996	189	GCGGCTCTTATATACTACCGTACCCTGTGATAGCTCTTCTTGAGTTTCACTTTCTGTCAGCTGCTTGATGATACCAATTTACGAGATTAGTTCTTTAGCG
Ogt_G50_S2	X	[mm10]chrX:101706999-101707059	190	GCGGCTCTTATATACTACCGTTGTACGAATCAACTATTGTCCTTTCAGCTGATAGTGGACAAAAAATTGGGGGGCTTTCTACGAGATTAGTTCTTTAGCG
Ogt_G50_S2	X	[mm10]chrX:101707107-101707167	191	GCGGCTCTTATATACTACCGATGCTGCTCATGCGCTTGCTTGTATGGGATTTGCACATTTTCTTTTGCATGTTCATCTGTCGCAGATTTACCATTAGTCG
Ogt_G50_S2	X	[mm10]chrX:101707170-101707230	192	GCGGCTCTTATATACTACCGGTGGATACTGGAGACTCCCAAGGGGATGAAGGAGTCTGGCTGAATGAAGCTTTCTGACCCCGCAGATTTACCATTAGTCG
Ogt_G50_S2	X	[mm10]chrX:101707278-101707338	193	GCGGCTCTTATATACTACCGTCCTTTCTCTCCCTCTAGCCATCCAGCCAAAGTGCCAAGCCTTTGTGCTCTCCTTAAATCACGAGATTAGTTCTTTAGCG
Ogt_G50_S2	X	[mm10]chrX:101707341-101707401	194	GCGGCTCTTATATACTACCGGTAGTTAACTGGCAGAGTGCTCCTTCAAACTCAGAGCAGCTCTGGCTTCTGTCCTTAAACACGAGATTAGTTCTTTAGCG
Ogt_G50_S2	X	[mm10]chrX:101707456-101707516	195	GCGGCTCTTATATACTACCGTTACACTGATGTAAGCCAACATAGTTGAATGTGATGGGACATTTAATCCCAGCACTCAGACGCAGATTTACCATTAGTCG
Ogt_G50_S2	X	[mm10]chrX:101707523-101707583	196	GCGGCTCTTATATACTACCGGGCCAGATAATTAGGAGTTCAAGGCCACTTTCAGTATATCAAGTTCAAGGCCCAACTGAACGCAGATTTACCATTAGTCG
Ogt_G50_S2	X	[mm10]chrX:101707631-101707691	197	GCGGCTCTTATATACTACCGGGGGAAGGTAGAGCTTACATGTTTGATCTTGGATGGGAGGGAGGGTAGTTAAAAATGTTTACGAGATTAGTTCTTTAGCG
Ogt_G50_S2	X	[mm10]chrX:101707694-101707754	198	GCGGCTCTTATATACTACCGGAGTTTTTCCAATGCCTTGCACGAACATACTTCCCCCTTCTGTATTTATTCATGTTTTTTACGAGATTAGTTCTTTAGCG
Ogt_G50_S2	X	[mm10]chrX:101707802-101707862	199	GCGGCTCTTATATACTACCGAAGCATTCTGCCACTGGGCCACATCCATGCTATCCTGTGAATTTTCAAAGCATCACAGACCGCAGATTTACCATTAGTCG
Ogt_G50_S2	X	[mm10]chrX:101707865-101707925	200	GCGGCTCTTATATACTACCGGGAAAAAAGTGTTAGGGTGAGGTAGATGGCTTGGAGTGCTTTCATTTTCATTAAGCTATACGCAGATTTACCATTAGTCG
Ogt_G50_S2	X	[mm10]chrX:101708515-101708575	201	GCGGCTCTTATATACTACCGTTTATAAAAACCCAGACGGGGCAATGTCCTCCCCAGCCCAGGTGCCACTAGGCACAGCATACGAGATTAGTTCTTTAGCG
Ogt_G50_S2	X	[mm10]chrX:101708578-101708638	202	GCGGCTCTTATATACTACCGAGACTAAGAATTCAACAGGGGAAAGGCTGGACACTCAGGGTTTGGGAGTATAAGCCCCCAACGAGATTAGTTCTTTAGCG
Ogt_G50_S2	X	[mm10]chrX:101708686-101708746	203	GCGGCTCTTATATACTACCGAAAGAATTGGAAACCCAGCAGCTGCCTTCTGCAGGGATGGGCTCGGGAAGGAGGTAGGGACGCAGATTTACCATTAGTCG
Ogt_G50_S2	X	[mm10]chrX:101708749-101708809	204	GCGGCTCTTATATACTACCGGGCATTTCACATCACTAAACTAACCTAACTTGGGAAACCGTAAGGGACCGTCTTCAACTGCGCAGATTTACCATTAGTCG
Ogt_G50_S2	X	[mm10]chrX:101708857-101708917	205	GCGGCTCTTATATACTACCGGTGAAAAGGGAACGTGGCTGGGAGGGGGCAACAAGCCCCTTCCTTTCTGGGCACAGGAAGACGAGATTAGTTCTTTAGCG
Ogt_G50_S2	X	[mm10]chrX:101708922-101708982	206	GCGGCTCTTATATACTACCGCAGGGCACAAGGTCCAGGCAGTGACCTCACAAGGACAGCACAGTTTTTGCAGCTTAGAGAACGAGATTAGTTCTTTAGCG
Ogt_G50_S2	X	[mm10]chrX:101709021-101709081	207	GCGGCTCTTATATACTACCGCTGGCAGGTGTGCAGTGGATGGCTCTGCAGCCTGGGGCCCTGCCTCCTCTTCTGTGTCTCCGCAGATTTACCATTAGTCG
Ogt_G50_S2	X	[mm10]chrX:101709084-101709144	208	GCGGCTCTTATATACTACCGCCTTGGAGGCAGCACTAGCCTTTGCCTCCTTGGCCTGGGGCTCTTGGCTCTCAGGGGCAGCGCAGATTTACCATTAGTCG
Ogt_G50_S2	X	[mm10]chrX:101709204-101709264	209	GCGGCTCTTATATACTACCGGCTCTTCCTCTGTTGGCGAGGAGGCTGAAGAATCATCCCACCCTCCTTCCTATTTCTCTTACGAGATTAGTTCTTTAGCG
Ogt_G50_S2	X	[mm10]chrX:101709271-101709331	210	GCGGCTCTTATATACTACCGAGGCCACTCAACTTGAAAGGCTTCTTGAAAGAGAATTTCTTCTTCTTGGGGTTCTCCTTGACGAGATTAGTTCTTTAGCG
Ogt_G50_S2	X	[mm10]chrX:101709379-101709439	211	GCGGCTCTTATATACTACCGTCGATGACATCGCCAGTAGGCCCAGCTGCCTCATCAAGGGTGGTGACTCCCTTTCACCCTCGCAGATTTACCATTAGTCG
Ogt_G50_S2	X	[mm10]chrX:101709442-101709502	212	GCGGCTCTTATATACTACCGGGTTTAAGTCTCCAGTGCTTTTTTCACGTGGCCATTCTCCTGTCCATTGGCCTTCGCTGGCGCAGATTTACCATTAGTCG
Ogt_G50_S2	X	[mm10]chrX:101709550-101709610	213	GCGGCTCTTATATACTACCGGGCGCTGGCGCTGCAGGGGATAGTTCGGCTGGGACGGCCCAGCGAGCAGAGGGGTGGGGCACGAGATTAGTTCTTTAGCG
Ogt_G50_S2	X	[mm10]chrX:101709613-101709673	214	GCGGCTCTTATATACTACCGGTCCGAGAGGGAGAGGCACGGGGGACGGGGAGGGGGGGGGGCAAGCGCGCTGCAACCCCCACGAGATTAGTTCTTTAGCG
Ogt_G50_S2	X	[mm10]chrX:101716275-101716335	215	GCGGCTCTTATATACTACCGGGCGAGACTCCGCTGGCAAGGTACCTCGGGGCTCGACTCAAGGTTGTATTTTTAGAGAAACGCAGATTTACCATTAGTCG
Ogt_G50_S2	X	[mm10]chrX:101716338-101716398	216	GCGGCTCTTATATACTACCGTATTTTCAGGGAGGGAAAGGGAAAAAGTGATGTGTCAGTTGTGGGGTAGGGGAGATGAGCCGCAGATTTACCATTAGTCG
Ogt_G50_S2	X	[mm10]chrX:101716446-101716506	217	GCGGCTCTTATATACTACCGGAAGAAAGAAGCAGCTCATCATGTGCTCCCCGACCCCTGTGAGCAAGGACTCTTCTCTGGACGAGATTAGTTCTTTAGCG
Ogt_G50_S2	X	[mm10]chrX:101716509-101716569	218	GCGGCTCTTATATACTACCGCTGTATACACATTCAAGCTGTTTTCCCTATAGGGATGCTTGTCTTGATAATACCCAGGTCACGAGATTAGTTCTTTAGCG
Ogt_G50_S2	X	[mm10]chrX:101716618-101716678	219	GCGGCTCTTATATACTACCGGATACTACCCTTTATCCAAAGGTGACCAGATTGAACTTTTACCTGTCTTGTACTAAATTGCGCAGATTTACCATTAGTCG
Ogt_G50_S2	X	[mm10]chrX:101716681-101716741	220	GCGGCTCTTATATACTACCGTGGGAACCTCCTATGGTGCTTCATATAGTTCCTGTATAAGCTGCTTGCTGGCCATAGTGTCGCAGATTTACCATTAGTCG
Ogt_G50_S2	X	[mm10]chrX:101716789-101716849	221	GCGGCTCTTATATACTACCGCATAGGCTTTGAGGGAATGTTTGCTACACCCTGAGGCTAGCCTTTTCTGATTATACACTGACGAGATTAGTTCTTTAGCG
Ogt_G50_S2	X	[mm10]chrX:101716852-101716912	222	GCGGCTCTTATATACTACCGTCCCACTCTCTGCTGAAGTTGGCAGATAGTATAGGTTTTCATCTGCTGCTTTTGCTGATAACGAGATTAGTTCTTTAGCG
Ogt_G50_S2	X	[mm10]chrX:101716960-101717020	223	GCGGCTCTTATATACTACCGACTTGAATTGGGCTTTGACTCTTCTAAGAGAATAAATACTTGAGCTACTCACATACCCTTCGCAGATTTACCATTAGTCG
Ogt_G50_S2	X	[mm10]chrX:101717023-101717083	224	GCGGCTCTTATATACTACCGGAAAAAGGACCTCCTTTACTACAATGCCAGTGCCTCTGGCTTTGGTATCCATGTGGTGGGCGCAGATTTACCATTAGTCG
Ogt_G50_S2	X	[mm10]chrX:101717117-101717177	225	GCGGCTCTTATATACTACCGTTACAGCGGCTGACTGGGGTGGATTCAGATACCTACAGGGGCTGCTGCCAAAGGCAGCCAACGAGATTAGTTCTTTAGCG
Ogt_G50_S2	X	[mm10]chrX:101717183-101717243	226	GCGGCTCTTATATACTACCGAGAGAAGCTCAGCAGACTTTTTTTTTTTTTCTGAGGAAACAAAGCTTAATTTACTGGGGCACGAGATTAGTTCTTTAGCG
Ogt_G50_S2	X	[mm10]chrX:101717277-101717337	227	GCGGCTCTTATATACTACCGTTAATTTAACTCCTAACTCCTTGGGGCTGGTGAGAAAGAGAAGGAAAGAGGGGCGGGGGGCGCAGATTTACCATTAGTCG
Ogt_G50_S2	X	[mm10]chrX:101717340-101717400	228	GCGGCTCTTATATACTACCGGGGGGGAGTGTGCACGCACGGACACACACACACACACACACCCAATGAACGAAACAAAAGCGCAGATTTACCATTAGTCG
Ogt_G50_S2	X	[mm10]chrX:101717467-101717527	229	GCGGCTCTTATATACTACCGTGTATACAGACCTAAAGATAGACATATACATAGTCACACATAGAACAGCTAGAGCAAAGCACGAGATTAGTTCTTTAGCG
Ogt_G50_S2	X	[mm10]chrX:101717534-101717594	230	GCGGCTCTTATATACTACCGAGCAGGCTCCAAGTATTCCACACACACATACATAAATGCACACAACTGCTGGATGGGAATACGAGATTAGTTCTTTAGCG
Ogt_G50_S2	X	[mm10]chrX:101718966-101719026	231	GCGGCTCTTATATACTACCGAAGCCCCCTTAAAGTTTCATATAATTCTTAGATTAAGAGGGATATGAGGGCAGCAAGCAGCGCAGATTTACCATTAGTCG
Ogt_G50_S2	X	[mm10]chrX:101719029-101719089	232	GCGGCTCTTATATACTACCGAGAACTCCATAACAGCATATAGTCCTAAGGGCTGTGCTGTACTGAGGTCCACCCATGTGGCGCAGATTTACCATTAGTCG
Ogt_G50_S2	X	[mm10]chrX:101719137-101719197	233	GCGGCTCTTATATACTACCGGTTCTGCTGGTCTGGGTACCAGAGGCTATCCAGAGATCTCTGGCCAGGCCAGGTGGGGAGACGAGATTAGTTCTTTAGCG
Ogt_G50_S2	X	[mm10]chrX:101719200-101719260	234	GCGGCTCTTATATACTACCGTCAAATGAAGGGGAAAGGGCATGGATGAGCAGGGAGGGGGAATTGCCTTTGTCACCTCGCACGAGATTAGTTCTTTAGCG
Ogt_G50_S2	X	[mm10]chrX:101719294-101719354	235	GCGGCTCTTATATACTACCGTCCCAGCAGCCTCTGTTGCTCCAAGACACTGCACTGGATGTGCTGAGCTGAGCCAGTGGGCGCAGATTTACCATTAGTCG
Ogt_G50_S2	X	[mm10]chrX:101719357-101719417	236	GCGGCTCTTATATACTACCGGGGTGGGGGGCTGGCTAGCCAGCAAGGGGAGTGCAGGGGAGCTTCCGATGGTGAGAGCTTCGCAGATTTACCATTAGTCG
Ogt_G50_S2	X	[mm10]chrX:101719450-101719510	237	GCGGCTCTTATATACTACCGGCTCTTATGACAGATGCTCTCAGATGATGGAATAAATCCCACATGCTCGTTTATTCCTTCACGAGATTAGTTCTTTAGCG
Ogt_G50_S2	X	[mm10]chrX:101719513-101719573	238	GCGGCTCTTATATACTACCGATAGGATATTAGATACAGTTTTGGAATAGGTTGGGGTCTGAAAGCAGGTGCTTTCTATTGACGAGATTAGTTCTTTAGCG
Ogt_G50_S2	X	[mm10]chrX:101719614-101719674	239	GCGGCTCTTATATACTACCGAGGGCTTGGGGTGCTACCCCTATGTGACTGATGGCCACAATTCTCTTATGGGGGGCTGTGCGCAGATTTACCATTAGTCG
Ogt_G50_S2	X	[mm10]chrX:101719680-101719740	240	GCGGCTCTTATATACTACCGTTAGAGGGGTATAGTGCTGGGAGCAGGTGAAGCTCCTACTGTCCCTTCTGTGTCCCCAGGCGCAGATTTACCATTAGTCG
Ogt_G50_S2	X	[mm10]chrX:101719773-101719833	241	GCGGCTCTTATATACTACCGCTCTCATAGTCCACTGCCCAGCCGGGCAGTGGTGGCGCATGCCTTTAATCCCAGCACTTGACGAGATTAGTTCTTTAGCG
Ogt_G50_S2	X	[mm10]chrX:101719840-101719900	242	GCGGCTCTTATATACTACCGGAGGCAGGCAGAACTCTCAGAAGAGTTCGAGGCCAGCCTGGTCTACAGAGTGAGTTTCAGACGAGATTAGTTCTTTAGCG
Ogt_G50_S2	X	[mm10]chrX:101719956-101720016	243	GCGGCTCTTATATACTACCGAAAAAAAAGTCCACTGCCTGATACCATTCTTCCTGCATGGCCCTTGGCTTAAGTTTAGAACGCAGATTTACCATTAGTCG
Ogt_G50_S2	X	[mm10]chrX:101720023-101720083	244	GCGGCTCTTATATACTACCGTCCTTCTGTTAGCTTTCTTTGTTTTGTTTATTACTTTGCTTTCTCCCCACTTCAAGTTCCCGCAGATTTACCATTAGTCG
Ogt_G50_S2	X	[mm10]chrX:101720131-101720191	245	GCGGCTCTTATATACTACCGAAATTCTCCATCTCAGGAACCTGAGAAGTCAGAAACTCACCATGTTCCCATTTCTTTTTCACGAGATTAGTTCTTTAGCG
Ogt_G50_S2	X	[mm10]chrX:101720194-101720254	246	GCGGCTCTTATATACTACCGCTCTGTGGGCTTGTCTCTCTGACTATGAATTGCTCTAGCCATGGTTTAAAATTAAAAACAACGAGATTAGTTCTTTAGCG
Ogt_G50_S2	X	[mm10]chrX:101720302-101720362	247	GCGGCTCTTATATACTACCGAATAGGTAGGATAAGGCAGAATGGTTGCCATGAGTTTGGGGCCAGCCTTGTTTGTGTTCACGCAGATTTACCATTAGTCG
Ogt_G50_S2	X	[mm10]chrX:101720365-101720425	248	GCGGCTCTTATATACTACCGTGATGGCCTATCTCCTAAGAACCGCCCCATTTAAATCAGTAGTGAATGAGCACTAGCCCTCGCAGATTTACCATTAGTCG
Ogt_G50_S2	X	[mm10]chrX:101720473-101720533	249	GCGGCTCTTATATACTACCGATAATGGTTTAATGGAAAACATGAGAGATTTGGGTCAGAAGATCTGTTGTCTCTGACCTTACGAGATTAGTTCTTTAGCG
Ogt_G50_S2	X	[mm10]chrX:101720536-101720596	250	GCGGCTCTTATATACTACCGGCCAGACACCTCTAAGCCCCAGTGTCTTCATCTGCAAGATAGAGATGGGAACAAACAGTAACGAGATTAGTTCTTTAGCG
Ogt_G50_S2	X	[mm10]chrX:101720644-101720704	251	GCGGCTCTTATATACTACCGAGGTTCTTTGCAAATGCTAAAATACCATTGGTGTTCCTCAGTAAAGGTAAAGCTGGGGTCCGCAGATTTACCATTAGTCG
Ogt_G50_S2	X	[mm10]chrX:101720707-101720767	252	GCGGCTCTTATATACTACCGCTGTGTCCTGGGAAAGAATTCAGGCTTAAGTACAACAGTGGGAAATCACAGTTCACTCCACGCAGATTTACCATTAGTCG
Ogt_G50_S2	X	[mm10]chrX:101720815-101720875	253	GCGGCTCTTATATACTACCGGACCTTGAATTGCCAGGCCAATTGGGCAAGGAAAAGCCAGAAGGAAAGAAAATTAATCTGACGAGATTAGTTCTTTAGCG
Ogt_G50_S2	X	[mm10]chrX:101720878-101720938	254	GCGGCTCTTATATACTACCGGTGAGTGAGTAGTTGGAGTAGACGAAAAAGAGCCTGGTTGAAAAGAGCACAATTAGAGTGACGAGATTAGTTCTTTAGCG
Ogt_G50_S2	X	[mm10]chrX:101720986-101721046	255	GCGGCTCTTATATACTACCGTGGCTGGAAGAGCCCATAGTGTGGAAGTAGCAACCCACTTCCCAGCTGAACACAAGGTAACGCAGATTTACCATTAGTCG
Ogt_G50_S2	X	[mm10]chrX:101721049-101721109	256	GCGGCTCTTATATACTACCGAAAAATATACTTCAAATGCCTCTGAGGGTTTTGGCCAGTTGTGATGAAATGTTGATTGTGCGCAGATTTACCATTAGTCG
Ogt_G50_S2	X	[mm10]chrX:101721157-101721217	257	GCGGCTCTTATATACTACCGTTGAATTAACTATAATGAGAACCATCAAAGGAGCGCTCTAGACAAGTGTGGTGATCGGTCACGAGATTAGTTCTTTAGCG
Ogt_G50_S2	X	[mm10]chrX:101721220-101721280	258	GCGGCTCTTATATACTACCGAGGGTGAAACCTGGTCTCATACCTTTGAGACTATTCCAAGATTAAAGAGAAACATGAATGACGAGATTAGTTCTTTAGCG
Ogt_G50_S2	X	[mm10]chrX:101721522-101721582	259	GCGGCTCTTATATACTACCGAGGGAAAATAAATAAATAAGCATTTATTGAATACCCCTTGTATGCCAGCACTCTCTGCTGCGCAGATTTACCATTAGTCG
Ogt_G50_S2	X	[mm10]chrX:101721585-101721645	260	GCGGCTCTTATATACTACCGCGCATGTGTACCGGGACATGTGTTAATTTAAGCAGAATTGGACCACTCCATCAGTAGTGGCGCAGATTTACCATTAGTCG
Ogt_G50_S2	X	[mm10]chrX:101721696-101721756	261	GCGGCTCTTATATACTACCGAAATTTGTAGAAAAGGAGGCAGATTTTATATGATAGTCAGCAGGGTGGAGATCTTTATGCACGAGATTAGTTCTTTAGCG
Ogt_G50_S2	X	[mm10]chrX:101721759-101721819	262	GCGGCTCTTATATACTACCGTACAGGCTGTTTGGATCAATCAGGAACTAGATGCCTTTGCCCAATAACAATTCTGTTTACACGAGATTAGTTCTTTAGCG
Ogt_G50_S2	X	[mm10]chrX:101721867-101721927	263	GCGGCTCTTATATACTACCGCTGGGGGGGGGGGATGCATTTTAGACTTTACAGACATGAGAGATATGCTTACATGAAGGACGCAGATTTACCATTAGTCG
Ogt_G50_S2	X	[mm10]chrX:101721930-101721990	264	GCGGCTCTTATATACTACCGGTTTTTGTTTTGTGCTATATGGAACGGGTGGTTATTATAGTAGGGGATTAGCAGAGTGAGCGCAGATTTACCATTAGTCG
Ogt_G50_S2	X	[mm10]chrX:101722038-101722098	265	GCGGCTCTTATATACTACCGAGGCTCCTGTTTCTTAAGGAAAGTTAGTACTGAGAACAGCAGTAGGGAGTCACATGTATTACGAGATTAGTTCTTTAGCG
Ogt_G50_S2	X	[mm10]chrX:101722104-101722164	266	GCGGCTCTTATATACTACCGAAGAAGATGATAGGAAGGAGCTGGACAATTTATTTAACCTCATTTTACCCGTGTTTTCTGACGAGATTAGTTCTTTAGCG
Ogt_G50_S2	X	[mm10]chrX:101722210-101722270	267	GCGGCTCTTATATACTACCGGAACTGGTTCTGGTACCCCTCAACAAATGACAAAACCTAAAATGCTCAAATACCTTATATCGCAGATTTACCATTAGTCG
Ogt_G50_S2	X	[mm10]chrX:101722273-101722333	268	GCGGCTCTTATATACTACCGATGTCCTCTACTCATCCTCCGCTACACTTCATCCCACCTGTATGCTACTTCCAATGCCCGCGCAGATTTACCATTAGTCG
Ogt_G50_S2	X	[mm10]chrX:101722558-101722618	269	GCGGCTCTTATATACTACCGAGGATTTCATGTTCATAAAATGCTTAGAGCAGGTCCTAAACAGAGAAAGCCCTTGTTTTTACGAGATTAGTTCTTTAGCG
Ogt_G50_S2	X	[mm10]chrX:101722621-101722681	270	GCGGCTCTTATATACTACCGACTATAGATGGCCTTGGGGATTAGGTTAGGGGAAGTTAAGTTGAAATCAGTAGGCACAAGACGAGATTAGTTCTTTAGCG
Ogt_G50_S2	X	[mm10]chrX:101722729-101722789	271	GCGGCTCTTATATACTACCGCTAGTAGCTTGGTGGTATGTACTGGATTAGAAATCCAGAGGCAGAGGCCTGCTGGCCAGTCGCAGATTTACCATTAGTCG
Ogt_G50_S2	X	[mm10]chrX:101722795-101722855	272	GCGGCTCTTATATACTACCGGATTGTTCACTTTGGTTTTCTTGTTTGTTTGTTTGTTTGTTTGTCTTGCCATGCTTCCTGCGCAGATTTACCATTAGTCG
Ogt_G50_S2	X	[mm10]chrX:101722903-101722963	273	GCGGCTCTTATATACTACCGCATTTGCTGTTGCTTTTTGATCCAATTTTGTAGTTTCCTGATGAGATTTTGCAGAGGGCAACGAGATTAGTTCTTTAGCG
Ogt_G50_S2	X	[mm10]chrX:101722966-101723026	274	GCGGCTCTTATATACTACCGCTTATATCCTGAAGGTTCTTCAGTCTTTGGTACCCTTCCTCATGACACTGATGCTATATCACGAGATTAGTTCTTTAGCG
Ogt_G50_S2	X	[mm10]chrX:101723074-101723134	275	GCGGCTCTTATATACTACCGCCTCAGCAGCCTTGCACTTCTCTCCTGACGGCCCCAGACTTGGATCCATGCATCTAAGCACGCAGATTTACCATTAGTCG
Ogt_G50_S2	X	[mm10]chrX:101723137-101723197	276	GCGGCTCTTATATACTACCGAATCCTACATTTGTGTGGCCTCAACAATTTCCTCCCTTGGGTCCTGATTAGTTAACGTAACGCAGATTTACCATTAGTCG
Ogt_G50_S2	X	[mm10]chrX:101723402-101723462	277	GCGGCTCTTATATACTACCGCACCACTCCCTGCTTCAACCCCTTCTCTCAAACTCATAACCTCTTTAATTGTTTTTTGTGACGAGATTAGTTCTTTAGCG
Ogt_G50_S2	X	[mm10]chrX:101723465-101723525	278	GCGGCTCTTATATACTACCGATGTGTATGTGTGTAAAATCTACTGAGTCCATTTAGTGTTGCTCCTATGTCCATGTGTTTACGAGATTAGTTCTTTAGCG
Ogt_G50_S2	X	[mm10]chrX:101723562-101723622	279	GCGGCTCTTATATACTACCGTTCATCCCTGGAGGAAAAAAACCTGTTTTGCCAGGGCAGCTATTGCCTGTAGCTTTTCATCGCAGATTTACCATTAGTCG
Ogt_G50_S2	X	[mm10]chrX:101723625-101723685	280	GCGGCTCTTATATACTACCGCGGGTAGAGTCTTTTGAAATTTCTTTCATCCATGTTGGCATGTCCTCTTACTTTTCATTACGCAGATTTACCATTAGTCG
Ogt_G50_S2	X	[mm10]chrX:101723744-101723804	281	GCGGCTCTTATATACTACCGTGCCTCAGCAGTTATGAGCTCATAACTTTTTTTTTTTTTTTTTGCTTTTGCAGTGGACCCACGAGATTAGTTCTTTAGCG
Ogt_G50_S2	X	[mm10]chrX:101723807-101723867	282	GCGGCTCTTATATACTACCGTGTGGTTCCCAGCATGCATATGGCAACTCACAACTGCTTTATAGTTCCAAGCTCCAGGGAACGAGATTAGTTCTTTAGCG
Ogt_G50_S2	X	[mm10]chrX:101724103-101724163	283	GCGGCTCTTATATACTACCGACTGGCATTTCTCTGAAAGTCTGTGACTCTGCTGGTCATTCCGGGAAAATGGCGACTTAACGCAGATTTACCATTAGTCG
Ogt_G50_S2	X	[mm10]chrX:101724166-101724226	284	GCGGCTCTTATATACTACCGTAGCACCCTGTCTTTCTGATAAGAAACCTGAGAGCTGAAGTCTGGCTAAATGCAAAGCCGCGCAGATTTACCATTAGTCG
Ogt_G50_S2	X	[mm10]chrX:101724274-101724334	285	GCGGCTCTTATATACTACCGCTGAGAGAATGGAGATGCTGGTTTTGGCAAGGGAAATGAGCAGGTGGGCCTGGAAAATCAACGAGATTAGTTCTTTAGCG
Ogt_G50_S2	X	[mm10]chrX:101724337-101724397	286	GCGGCTCTTATATACTACCGCCTATGTTGAGTTCCTAGGGATTGGTGAAGCATCCAATAATGATATCCTCTATGCAACACACGAGATTAGTTCTTTAGCG
Ogt_G50_S2	X	[mm10]chrX:101724445-101724505	287	GCGGCTCTTATATACTACCGTCTGCCAGGTAAGTGTAATTTAGCAGGTTTCTTCCATCTACCCCTACCATATTGGGAACCCGCAGATTTACCATTAGTCG
Ogt_G50_S2	X	[mm10]chrX:101724508-101724568	288	GCGGCTCTTATATACTACCGGCCTCACACATGTTCTGTAAGAGGTATGCCACTAAATAGCAGCTACAACCTTCATTAATTCGCAGATTTACCATTAGTCG
Ogt_G50_S2	X	[mm10]chrX:101724616-101724676	289	GCGGCTCTTATATACTACCGATATTGCCCAGGCTGGTCTTGAACCCCTGGCTCAAGCAGAGCTCTCATCTCAGCTTCCTGACGAGATTAGTTCTTTAGCG
Ogt_G50_S2	X	[mm10]chrX:101724679-101724739	290	GCGGCTCTTATATACTACCGAGCTGGAACTCCATACAAGGGTCTACCAGCAACCCAGCTTATAATGACCTTAGTTGGTGGACGAGATTAGTTCTTTAGCG
Ogt_G50_S2	X	[mm10]chrX:101724784-101724844	291	GCGGCTCTTATATACTACCGAGGGCTGGTCTCACACTCACTATATAGCTCAGGCTGACCTAGAATTTGTGTAGTCCTCCTCGCAGATTTACCATTAGTCG
Ogt_G50_S2	X	[mm10]chrX:101724847-101724907	292	GCGGCTCTTATATACTACCGTCAGCCTTCCAGTGCTAGGATTACATAAGTAAGCTGCTGGATTTTTGTTGTTGTTTATTTCGCAGATTTACCATTAGTCG
Ogt_G50_S2	X	[mm10]chrX:101725126-101725186	293	GCGGCTCTTATATACTACCGTTGTTTTGAGATGGGCTCACTATGTAACTCTGACCTCTAGCTTTAGTCCGTCAAGGGCTGACGAGATTAGTTCTTTAGCG
Ogt_G50_S2	X	[mm10]chrX:101725190-101725250	294	GCGGCTCTTATATACTACCGCATAGGTTGAGTATCAGCTTGGATGGATTTTCTAATTCTAAAGTCAGTGAGTTGTTAAGCACGAGATTAGTTCTTTAGCG
Ogt_G50_S2	X	[mm10]chrX:101725301-101725361	295	GCGGCTCTTATATACTACCGGAGTTTGATCCCTGGGGCCTGAATATTAGAAGGAAAGAACCGACTCCCATGAAGTTGTCTCGCAGATTTACCATTAGTCG
Ogt_G50_S2	X	[mm10]chrX:101725364-101725424	296	GCGGCTCTTATATACTACCGGGCCTCCACATGTATGCACATACACACATAATAAATCAATAAATGTATAATAGAGCCCAGCGCAGATTTACCATTAGTCG
Ogt_G50_S2	X	[mm10]chrX:101725472-101725532	297	GCGGCTCTTATATACTACCGCCAGATAGTCCCTGAGCCCACTTTTGTTTATAGAAGGAAGAAACCAATCCTTGTCCAGGTACGAGATTAGTTCTTTAGCG
Ogt_G50_S2	X	[mm10]chrX:101725535-101725595	298	GCGGCTCTTATATACTACCGCTTGTAGCAATGCCCCACAAGAAGATGAACATGTTAGAGCTGCTCCCAACCTGACTTCTTACGAGATTAGTTCTTTAGCG
Ogt_G50_S2	X	[mm10]chrX:101725643-101725703	299	GCGGCTCTTATATACTACCGTCTCAGAATCTTGGGAAGGCAACCCCTATGGCTGCCTGCCTGTATACACTTCTGTGAGATCGCAGATTTACCATTAGTCG
Ogt_G50_S2	X	[mm10]chrX:101725706-101725766	300	GCGGCTCTTATATACTACCGCTTGTGTTTGGTGAAAGTGAAAATCAAGGGGTTTCTGGGCAGCAGATCAGAAGAAAATCTCGCAGATTTACCATTAGTCG
Ogt_G50_S2	X	[mm10]chrX:101725814-101725874	301	GCGGCTCTTATATACTACCGACACCATCCATGATCTATGCCATGCATCGTCCTGGCTGCTTGATGGCATCCAGGATTCTCACGAGATTAGTTCTTTAGCG
Ogt_G50_S2	X	[mm10]chrX:101725877-101725937	302	GCGGCTCTTATATACTACCGGTGACTCATGGCAATATTATGCTCAAAAATGCAATTCAGTACACCCAGAGCTGCCTAAGGACGAGATTAGTTCTTTAGCG
Ogt_G50_S2	X	[mm10]chrX:101726370-101726430	303	GCGGCTCTTATATACTACCGTGGAAGGTGGGACTGTTGAACTGCAGGGGTTTATGGCTGAGAAGCAACTAGTGGCCCCAGCGCAGATTTACCATTAGTCG
Ogt_G50_S2	X	[mm10]chrX:101726435-101726495	304	GCGGCTCTTATATACTACCGAGTGAACCGGAGCTGAGCAGAGAGCAATTGGTCACTGCAGGGCCTAGCTAGAGACAGAGTCGCAGATTTACCATTAGTCG
Ogt_G50_S2	X	[mm10]chrX:101726535-101726595	305	GCGGCTCTTATATACTACCGGCAGGAAGCCTGCTGGCATTTAAAAAAAAATATTTCCTGCAACAAATGTATTCTGTGCAAACGAGATTAGTTCTTTAGCG
Ogt_G50_S2	X	[mm10]chrX:101726598-101726658	306	GCGGCTCTTATATACTACCGCAGGAAAGGTCTTTCTCATACTTTTTTCCAATTACTTTGTCATTTCAGGCTCCAGTAGCTACGAGATTAGTTCTTTAGCG
Ogt_G50_S2	X	[mm10]chrX:101726696-101726756	307	GCGGCTCTTATATACTACCGTGAACTGAGGGTTTCATGTGTACCAGGCAAACACTACACTGAATCTCTGCTTGAGCAATGCGCAGATTTACCATTAGTCG
Ogt_G50_S2	X	[mm10]chrX:101726759-101726819	308	GCGGCTCTTATATACTACCGCCAGCCTTTTTCCTGTGGTTTTTGTTTTGTTTGTTTTGTTTTAAGAGGGTCTTAGCAAGTCGCAGATTTACCATTAGTCG
Ogt_G50_S2	X	[mm10]chrX:101726867-101726927	309	GCGGCTCTTATATACTACCGCTTGCCTCAGCCTCCCACGTGGCAAGACAAAGTAGATCTTTAGTTAAGACTGTGGACTGTACGAGATTAGTTCTTTAGCG
Ogt_G50_S2	X	[mm10]chrX:101726930-101726990	310	GCGGCTCTTATATACTACCGACTTGAGTGAATCTCACTATTTCTGTGTCCTCTTTCTCTATTACCCCCACCTAACCACCTACGAGATTAGTTCTTTAGCG
Ogt_G50_S2	X	[mm10]chrX:101727038-101727098	311	GCGGCTCTTATATACTACCGAGAACCCACAGAAAACAGTTTTGGGCACAAGGTTAAGGAGTTGGAGCTGATGTTGAGGTACGCAGATTTACCATTAGTCG
Ogt_G50_S2	X	[mm10]chrX:101727101-101727161	312	GCGGCTCTTATATACTACCGTTATTTATTTATTTAGGTATTGAATCTCCTTCCTCAGCAGGGTTGGCCACTATACCAGATCGCAGATTTACCATTAGTCG
Ogt_G50_S2	X	[mm10]chrX:101727209-101727269	313	GCGGCTCTTATATACTACCGTCTTGCTGTCATTATTTTGGAAGAATGGAACCCCCATTGTGCCCCATTTAAGGCCATTTGACGAGATTAGTTCTTTAGCG
Ogt_G50_S2	X	[mm10]chrX:101727272-101727332	314	GCGGCTCTTATATACTACCGAATATGTTCAGGAGAATTATAGAGCAGTGTTTAATGGGACAACAGGAATCAGCCATGGGGACGAGATTAGTTCTTTAGCG
Ogt_G50_S2	X	[mm10]chrX:101727368-101727428	315	GCGGCTCTTATATACTACCGGTAAATCTTTAAGGAAAATCCTTAAGGTTGTCCCGGAGTATATTTATATGAGCTGACTCCCGCAGATTTACCATTAGTCG
Ogt_G50_S2	X	[mm10]chrX:101727431-101727491	316	GCGGCTCTTATATACTACCGACTGGCAAGAAGTTTAAGAAATCCCTATTTCATGGGGCAGGTGAGATGGCTCAGCGGGTACGCAGATTTACCATTAGTCG
Ogt_G50_S2	X	[mm10]chrX:101727902-101727962	317	GCGGCTCTTATATACTACCGTTGTAAAGGCACTACCCCACAGCTAGGCTTCTGTCAGCCTATTACACTAGCCACATTTGAACGAGATTAGTTCTTTAGCG
Ogt_G50_S2	X	[mm10]chrX:101727965-101728025	318	GCGGCTCTTATATACTACCGGCCAACGTGCTTCATGAATTCCAGCTTGTCATGTCTTTGAGCAAAGCTAAGTCATGTAATACGAGATTAGTTCTTTAGCG
Ogt_G50_S2	X	[mm10]chrX:101728073-101728133	319	GCGGCTCTTATATACTACCGAAGAGTTCCAGCAGACTCCCTATCTTTGGGAGCTATTGAGGGTTGTGGATTGGATCCAAGCGCAGATTTACCATTAGTCG
Ogt_G50_S2	X	[mm10]chrX:101728136-101728196	320	GCGGCTCTTATATACTACCGGTATTTGTATATTTCTGTGGAAACCAGAGAAAATGGCCACCAATTGAATGGCTTAGATCTCGCAGATTTACCATTAGTCG
Ogt_G50_S2	X	[mm10]chrX:101728244-101728304	321	GCGGCTCTTATATACTACCGGTCGTCGAGATAACAATCTCAATCTTGACCTTCCTCTCTGGAGAATGAAGTTCTCTGTCTACGAGATTAGTTCTTTAGCG
Ogt_G50_S2	X	[mm10]chrX:101728307-101728367	322	GCGGCTCTTATATACTACCGCCAGCTCCTAGTTCCTCGCACAGCCCCTGCCTGCATGGCTTCTTCAAAGACAAAACATCTACGAGATTAGTTCTTTAGCG
Ogt_G50_S2	X	[mm10]chrX:101728421-101728481	323	GCGGCTCTTATATACTACCGGCAGTGGTGGCGGTGGCAGATGCTTCCTTCTCCTTCTCCTGCTCCCCCTCTCTTCTGCTGCGCAGATTTACCATTAGTCG
Ogt_G50_S2	X	[mm10]chrX:101728488-101728548	324	GCGGCTCTTATATACTACCGCACAGCACACCTGTGTGTGTGTGTGTGTGTGTGTGTGTGTGTGTGTGTGTGTGTATTTGGCGCAGATTTACCATTAGTCG
Ogt_G50_S2	X	[mm10]chrX:101728584-101728644	325	GCGGCTCTTATATACTACCGTAATTCCCAGGAGCTGTCCACCTTGGGTTGTTGGTTTTTTTTGTTTTGTTTTGTTTTGTTACGAGATTAGTTCTTTAGCG
Ogt_G50_S2	X	[mm10]chrX:101728647-101728707	326	GCGGCTCTTATATACTACCGTTTTTTTGTTTTTTGTTTTTTGAGACAGAGTTTCTCATGTGGCTGTAGGTCGTTCCGACTACGAGATTAGTTCTTTAGCG
Ogt_G50_S2	X	[mm10]chrX:101729454-101729514	327	GCGGCTCTTATATACTACCGCACCTCTCCAACCCCCACAATCTTATTTTTAAACCAGTTACTTCACAGATTAGCAACCTCCGCAGATTTACCATTAGTCG
Ogt_G50_S2	X	[mm10]chrX:101729518-101729578	328	GCGGCTCTTATATACTACCGCCTCTTTGCCATCTTTGTTGGCTTGTTTTGTTGTTGTTCTTTTGTGTGTTTGTTTTTGAGCGCAGATTTACCATTAGTCG
Ogt_G50_S2	X	[mm10]chrX:101729645-101729705	329	GCGGCTCTTATATACTACCGTACAGAAATCTTCTAGCTTCTGCCTCCCAAAAGCTGCAATTCAAGTTTGTGTACCACCTCACGAGATTAGTTCTTTAGCG
Ogt_G50_S2	X	[mm10]chrX:101729708-101729768	330	GCGGCTCTTATATACTACCGCTTCTGCTTGCTTAAGACAGGACTTTCCTTATTTAACCCCAGGCTAGTCTAAAATCCATGACGAGATTAGTTCTTTAGCG
Ogt_G50_S2	X	[mm10]chrX:101729816-101729876	331	GCGGCTCTTATATACTACCGCCAAGCACTCAGATTATAGGGATGTACCACTGTGCTTGGCGAGTGCCCTTTACCTGATCACGCAGATTTACCATTAGTCG
Ogt_G50_S2	X	[mm10]chrX:101729879-101729939	332	GCGGCTCTTATATACTACCGGCTCTAGGAGTCAGAGTATAGGTGTCTTGATGGACCCAGTTTTTGGCCTGCTACAAATAACGCAGATTTACCATTAGTCG
Ogt_G50_S2	X	[mm10]chrX:101729987-101730047	333	GCGGCTCTTATATACTACCGTCTTTTGACATTTTCCTCTCTTCTTGCTTCTCATGTTGTAGAAGGGTAGTCTAGTCTTTGACGAGATTAGTTCTTTAGCG
Ogt_G50_S2	X	[mm10]chrX:101730050-101730110	334	GCGGCTCTTATATACTACCGTACTGAGACTAGATAAGGTTGCAGGTATGTATCTATAGGGCAGGGCAAACTTACCCAGCTACGAGATTAGTTCTTTAGCG
Ogt_G50_S2	X	[mm10]chrX:101730158-101730218	335	GCGGCTCTTATATACTACCGAGATAAGACCCAGCCTGTCAGGGTGAGTCATGGCATGTTGGTGACTTCATTGGGAGAAAGCGCAGATTTACCATTAGTCG
Ogt_G50_S2	X	[mm10]chrX:101730221-101730281	336	GCGGCTCTTATATACTACCGCAGTGCAGGGGGTAGCCCTGTCACCTACCCTTCTGGAAAGCACTGGTTATTTTTTCCACTCGCAGATTTACCATTAGTCG
Ogt_G50_S2	X	[mm10]chrX:101730316-101730376	337	GCGGCTCTTATATACTACCGCTTCTTGCTTTGGTGGCTTCATGCTAATGTCTGCTAGCAAAGAAATCATCAGGCCCACCCACGAGATTAGTTCTTTAGCG
Ogt_G50_S2	X	[mm10]chrX:101730379-101730439	338	GCGGCTCTTATATACTACCGTGCTGGTGTGGGGTGTGTGTGTGTGTGTGTGTGTGTGTGTGTGTGTGTGCATGTATGTGAACGAGATTAGTTCTTTAGCG
Ogt_G50_S2	X	[mm10]chrX:101730481-101730541	339	GCGGCTCTTATATACTACCGTTATTTCTTTGAGACAGGAACCTGGAACTCACCCCCACCCTCAGGCTGGCAGCCAGCCAACGCAGATTTACCATTAGTCG
Ogt_G50_S2	X	[mm10]chrX:101730544-101730604	340	GCGGCTCTTATATACTACCGAACTCAACCCTATAGGCAGGCATGGACACACCCAGCTTTTACATAGGTGCTGGGGGTCTGCGCAGATTTACCATTAGTCG
Ogt_G50_S2	X	[mm10]chrX:101730652-101730712	341	GCGGCTCTTATATACTACCGCAGCCCCACCTTTTTTTTTTCAAGCCTATTTTCCCTGAATACTACCCAAATAACCAATACACGAGATTAGTTCTTTAGCG
Ogt_G50_S2	X	[mm10]chrX:101730715-101730775	342	GCGGCTCTTATATACTACCGTTTCTCTGAGTGGCCTGGGAGCCCATTGCCTTTACCCAGACCACAGCTTCATCATCAGCCACGAGATTAGTTCTTTAGCG
Ogt_G50_S2	X	[mm10]chrX:101730808-101730868	343	GCGGCTCTTATATACTACCGCTGAGACCATTTTTTTTTGAGAGAGAGAGAGAGAGAGAGAGAGAGAGAGAGAGAGAGAGACGCAGATTTACCATTAGTCG
Ogt_G50_S2	X	[mm10]chrX:101730871-101730931	344	GCGGCTCTTATATACTACCGAGAGAAAGAGAGAGAGAGAGAGAGAGTTTCTCACTGTGTAGCCCTGGTGGGCCTGGAACTCGCAGATTTACCATTAGTCG
Ogt_G50_S2	X	[mm10]chrX:101730979-101731039	345	GCGGCTCTTATATACTACCGCTCCCAAATACCGGTATGTACCACCACCTCTAGCCCAGACCACTTATAGTGTCCCCAAAGACGAGATTAGTTCTTTAGCG
Ogt_G50_S2	X	[mm10]chrX:101731042-101731102	346	GCGGCTCTTATATACTACCGTACTGTCTTCAGCCTCTCTGCCTCTGCTACCGCTCTCTCTTCTGCTTAGAAATAAAGAACACGAGATTAGTTCTTTAGCG
Ogt_G50_S2	X	[mm10]chrX:101731150-101731210	347	GCGGCTCTTATATACTACCGGAAAGCCATTTCAGATAGATCTTGCCATCTTGCTGAGCCCAGGACTTAGCGAGTGCTACCCGCAGATTTACCATTAGTCG
Ogt_G50_S2	X	[mm10]chrX:101731213-101731273	348	GCGGCTCTTATATACTACCGTTGCTCTGTAGTATAGATTGCTTGGTATTTGTTCATTTTCACCACACCTTCCCTGTTGGCCGCAGATTTACCATTAGTCG
Ogt_G50_S2	X	[mm10]chrX:101731321-101731381	349	GCGGCTCTTATATACTACCGCCAGAGCATACCTAGACAACCAGCTGTTCACTGCCACCACCCAAACCTGAGACTGTATCTACGAGATTAGTTCTTTAGCG
Ogt_G50_S2	X	[mm10]chrX:101731384-101731444	350	GCGGCTCTTATATACTACCGAGTTCCACTAGGCCACAGTGGGTGCAGTAGAGGGCACAGTAGAACCCAGGAGGGCAGAGAACGAGATTAGTTCTTTAGCG
Ogt_G50_S2	X	[mm10]chrX:101731497-101731557	351	GCGGCTCTTATATACTACCGCAGACCTGGTTCAAAGAATGACTGTGAATACGCCCTGGTCCTCATTACCTTGTTTATTGACGCAGATTTACCATTAGTCG
Ogt_G50_S2	X	[mm10]chrX:101731564-101731624	352	GCGGCTCTTATATACTACCGAGTGAGGTTTCTAGAAATAAAATTGGGCAAATATTGAGATACTGAGATGGGCACATTCAGCGCAGATTTACCATTAGTCG
Ogt_G50_S2	X	[mm10]chrX:101731672-101731732	353	GCGGCTCTTATATACTACCGCACAGGGATGGCTGAGTTCTACTTGCTAATTTAGTAGGGCGGTGGGGCTCCAGGCAGCTAACGAGATTAGTTCTTTAGCG
Ogt_G50_S2	X	[mm10]chrX:101731735-101731795	354	GCGGCTCTTATATACTACCGCTAAAACAGCAAGATAGGGCATGGCAGCTAAGGCACAGTAATGGTGTTGTCCTTGTTGCTACGAGATTAGTTCTTTAGCG
Ogt_G50_S2	X	[mm10]chrX:101731843-101731903	355	GCGGCTCTTATATACTACCGCCTGGCAGCAAAGTTACGGGTAAGTTCGAGCTAGCCCAACTACAAGGAGGACAAGCACTTCGCAGATTTACCATTAGTCG
Ogt_G50_S2	X	[mm10]chrX:101731906-101731966	356	GCGGCTCTTATATACTACCGGTGTGTTAGGACTTGGGCTGCGCAGGCTACAGTTCCAGTCCAGAATTACAAGCCCAGGTACGCAGATTTACCATTAGTCG
Ogt_G50_S2	X	[mm10]chrX:101732017-101732077	357	GCGGCTCTTATATACTACCGCTGCCGCTGGGGCCCTCTCTGGTCAGAGCGGCCCAGGCGCGTGAACAACATCCACATTTGACGAGATTAGTTCTTTAGCG
Ogt_G50_S2	X	[mm10]chrX:101732084-101732144	358	GCGGCTCTTATATACTACCGAACTTCACTCCCACAAAGGCATAGAGCAGCGGATTGAGGCAGCAGTGCATGTACCCCATGACGAGATTAGTTCTTTAGCG
Ogt_G50_S2	X	[mm10]chrX:101732192-101732252	359	GCGGCTCTTATATACTACCGTTGCGGGCCAAAACTCCCACATCCATGAGGATATCCACTAGCACCACCAGGTGATAGGGGCGCAGATTTACCATTAGTCG
Ogt_G50_S2	X	[mm10]chrX:101732255-101732315	360	GCGGCTCTTATATACTACCGCAGCAGACAGCAAAGGCTGCCACCACCACTACCACTAGCCTCATAGCTCGAAAACGCCTCCGCAGATTTACCATTAGTCG
Ogt_G50_S2	X	[mm10]chrX:101732363-101732423	361	GCGGCTCTTATATACTACCGGCCATGACCAGAAGGGGCAGCAGGAAACCAGCCACTAGCTGCAGTACACGCAGAGCAGTGACGAGATTAGTTCTTTAGCG
Ogt_G50_S2	X	[mm10]chrX:101732426-101732486	362	GCGGCTCTTATATACTACCGCCCACCTGTGGGAAGTTGTACTGGCAATGGGTGGCATTGAGGCGCTGATCGTAGTTGGCTACGAGATTAGTTCTTTAGCG
Ogt_G50_S2	X	[mm10]chrX:101732534-101732594	363	GCGGCTCTTATATACTACCGACAACTATGCAGGTGAGGGCTACACGTACCCGGGGGTCCCTGCGGTAGATCTGGGTGGCGCGCAGATTTACCATTAGTCG
Ogt_G50_S2	X	[mm10]chrX:101732597-101732657	364	GCGGCTCTTATATACTACCGACTATGCTCAGATATCTGTCGAAGCTTATACAAGCCAGCAGGAAGGCCCCTGCATAGAAGCGCAGATTTACCATTAGTCG
Ogt_G50_S2	X	[mm10]chrX:101732705-101732765	365	GCGGCTCTTATATACTACCGACCCACTGGACAGCAGCATCCACTGCCCACAATGGAAGAGTTAACACCAGCAGAACATCGACGAGATTAGTTCTTTAGCG
Ogt_G50_S2	X	[mm10]chrX:101732768-101732828	366	GCGGCTCTTATATACTACCGACAGCCAGGTGGAGCAGGAAGGTGTCCGTGCTGCTCAGGGCAGTGCGCTGACTCAGTAGCACGAGATTAGTTCTTTAGCG
Ogt_G50_S2	X	[mm10]chrX:101732876-101732936	367	GCGGCTCTTATATACTACCGCTGTAGAGGGCTGGCAGGAAGGTTCTGTCAAAGTTCAGGCTGAAATCCTGTGGGCAGGGCCGCAGATTTACCATTAGTCG
Ogt_G50_S2	X	[mm10]chrX:101732939-101732999	368	GCGGCTCTTATATACTACCGGAGTCAGAGAAGTCGCTCTCGTTTTCCCCATAATCGTAGGGAGAGGTGCTGTTTTCCAGACGCAGATTTACCATTAGTCG
Ogt_G50_S2	X	[mm10]chrX:101733047-101733107	369	GCGGCTCTTATATACTACCGCCGAGGAAGGGGGAGAGAGGGAAGGGAGGCCATTCTCTGTAAAGACCCAGCAACTGGCTTACGAGATTAGTTCTTTAGCG
Ogt_G50_S2	X	[mm10]chrX:101733110-101733170	370	GCGGCTCTTATATACTACCGCCCTTTGTGCCCTGTCATTTATTCTGGTGAGTGTTTGTTTCCCTTAGCAATAGCCAGACCACGAGATTAGTTCTTTAGCG
Ogt_G50_S2	X	[mm10]chrX:101733218-101733278	371	GCGGCTCTTATATACTACCGACTCAGACTGGGAAGGTGACCCCCCCTTTTCAAAGGCTGGTAACCCCCCGGCCCCCCCCCCGCAGATTTACCATTAGTCG
Ogt_G50_S2	X	[mm10]chrX:101733281-101733341	372	GCGGCTCTTATATACTACCGCAGACCCTTTCTGGATTATCATCCAGGACAGGGATTCTCTGCCGGAAGAGGAACTTCCTTCGCAGATTTACCATTAGTCG
Ogt_G50_S2	X	[mm10]chrX:101733389-101733449	373	GCGGCTCTTATATACTACCGATTTGTCAGCCTTGCTGCTATGGCCACCCCTGCCTGGATCAACCACTGGCCTCCCCAGGTACGAGATTAGTTCTTTAGCG
Ogt_G50_S2	X	[mm10]chrX:101733452-101733512	374	GCGGCTCTTATATACTACCGTCCTTACTCTATCTTCTAGTCCCTGGCCCTCCTTTTCCCTCCTCAGCCCTTATCTGGTGAACGAGATTAGTTCTTTAGCG
Ogt_G50_S2	X	[mm10]chrX:101733560-101733620	375	GCGGCTCTTATATACTACCGCCCCTACACACACCGTACATGCCTCTCTTCCCCTACCCAGAGGCAGTGGGTACCCACTGACGCAGATTTACCATTAGTCG
Ogt_G50_S2	X	[mm10]chrX:101733623-101733683	376	GCGGCTCTTATATACTACCGTCCCACCCAAGCCCTAATTGGTCTTCCCAAGATGGCCAGGCTGATTTCAAACTCTTGGGCCGCAGATTTACCATTAGTCG
Ogt_G50_S2	X	[mm10]chrX:101733731-101733791	377	GCGGCTCTTATATACTACCGGCATACCACTTCCACTTCAGCTCTACACCTTATCCCAAACTATCTGAGAACTAGAGATCAACGAGATTAGTTCTTTAGCG
Ogt_G50_S2	X	[mm10]chrX:101733794-101733854	378	GCGGCTCTTATATACTACCGAAGTTGAGTTTCTACAGCTTGACATTTTCAGATGAGGCATCCAAGCCACAGAGGCAGGAGACGAGATTAGTTCTTTAGCG
Ogt_G50_S2	X	[mm10]chrX:101733902-101733962	379	GCGGCTCTTATATACTACCGTCTTATTATCAGAACCTCTGCATTCGATGCTGCTCACTCAGCCCGCTGGTGCCTCTTGGCCGCAGATTTACCATTAGTCG
Ogt_G50_S2	X	[mm10]chrX:101733965-101734025	380	GCGGCTCTTATATACTACCGGGGCCAGCCCACGCTTGTCCCTGGTATCCGAGCTCGGCCACTTGGCCGCTGTATTGTAGCCGCAGATTTACCATTAGTCG
Ogt_G50_S2	X	[mm10]chrX:101734073-101734133	381	GCGGCTCTTATATACTACCGTCCGGCTGTGGCTGCTGGGGTCAGGTCTCGTGCTGCCTGCTTCTCTGCCTTTGGCACTTGACGAGATTAGTTCTTTAGCG
Ogt_G50_S2	X	[mm10]chrX:101734136-101734196	382	GCGGCTCTTATATACTACCGTTGGGAACTTGCAGTGAACAGAGGAAGTGAAGATTTCACGGCTCAGCACAGCCTCTTCCAACGAGATTAGTTCTTTAGCG
Ogt_G50_S2	X	[mm10]chrX:101734244-101734304	383	GCGGCTCTTATATACTACCGGCCACGCCTGTGGTCAGGTGAATACACTTAGAAGGGGCTAGCCAGGAACTTGGGACTGTTCGCAGATTTACCATTAGTCG
Ogt_G50_S2	X	[mm10]chrX:101734307-101734367	384	GCGGCTCTTATATACTACCGAAGCCTGCAGTTCTTGTCTTACTCAATATCATTCATAAACAACTAAGTGAGTCTAGGAGCCGCAGATTTACCATTAGTCG
Ogt_G50_S2	X	[mm10]chrX:101734415-101734475	385	GCGGCTCTTATATACTACCGCTGAAGGGACCTTCTCCTTAGCAAGTACTGGGATTGGAGTCTCACTGGGACTGTGTTAGAACGAGATTAGTTCTTTAGCG
Ogt_G50_S2	X	[mm10]chrX:101734478-101734538	386	GCGGCTCTTATATACTACCGGGCTGTGGTGTGGCTACTGCTATCATAACTGCATGAGTAGGGAGGACATTTCCAAGAGATACGAGATTAGTTCTTTAGCG
Ogt_G50_S2	X	[mm10]chrX:101734757-101734817	387	GCGGCTCTTATATACTACCGGCAGGTGGGCATGTGTGGCGCAGACAAGCAGTGCAGCTGATAGGGCAACAGGCTATCAGGCGCAGATTTACCATTAGTCG
Ogt_G50_S2	X	[mm10]chrX:101734820-101734880	388	GCGGCTCTTATATACTACCGGTTGGAGTTCCATCTGGTGAGAAAGCAAAAAACCTGGGACCCAGGGAAGGGTCTGGGGTGCGCAGATTTACCATTAGTCG
Ogt_G50_S2	X	[mm10]chrX:101734928-101734988	389	GCGGCTCTTATATACTACCGGGGAAGTAGAGGGCAGCCCTGTTACCAGGTGCACGGACTGCTTCTGAATCACACCTAGACACGAGATTAGTTCTTTAGCG
Ogt_G50_S2	X	[mm10]chrX:101734991-101735051	390	GCGGCTCTTATATACTACCGGTGCTGGTCTGTCCCAGGGTGGTGCCTGCTTTTACAGACCCATCTCAAAGTCGGTGGTCTACGAGATTAGTTCTTTAGCG
Ogt_G50_S2	X	[mm10]chrX:101735090-101735150	391	GCGGCTCTTATATACTACCGTTTCTGAGATAGCCTCATTCTGTAGCCCAACCTGGCTTTGAACTCTCAGTGACCTTCCTGCGCAGATTTACCATTAGTCG
Ogt_G50_S2	X	[mm10]chrX:101735153-101735213	392	GCGGCTCTTATATACTACCGCAGCCTCACGAGAGCCGAGAGCCGGGATGATTGGAGTGCACCATTGTGAACAGCATGTGGCGCAGATTTACCATTAGTCG
Ogt_G50_S2	X	[mm10]chrX:101735261-101735321	393	GCGGCTCTTATATACTACCGTTCATCCAGCTAAACACAAGTGGAGAGCCACATATTTTTCATGAGGCTGAATGCAGAGGAACGAGATTAGTTCTTTAGCG
Ogt_G50_S2	X	[mm10]chrX:101735324-101735384	394	GCGGCTCTTATATACTACCGTATGCCCATGTGGTAGAAGAGGCAAGTAACAGACTATTGTATGTACTTTGGTACTACCCAACGAGATTAGTTCTTTAGCG
Ogt_G50_S2	X	[mm10]chrX:101735432-101735492	395	GCGGCTCTTATATACTACCGGCTGGGTAGTGGAAGTCGGGACTGGATAACTTTTTTTTTTCAGGCTCTTACTATGTGACACGCAGATTTACCATTAGTCG
Ogt_G50_S2	X	[mm10]chrX:101735495-101735555	396	GCGGCTCTTATATACTACCGGCTGGACTAGAACTCCACAGACTGGCCTCAAGCTCAGGGGCCTGCCTCCTGGCTGCTGGGCGCAGATTTACCATTAGTCG
Ogt_G50_S2	X	[mm10]chrX:101735621-101735681	397	GCGGCTCTTATATACTACCGATAGCCCAGGCTAGCTTTGAGTTCATGCTCCTCTTGCCATAGCCTCTGGAGAACTGAGATACGAGATTAGTTCTTTAGCG
Ogt_G50_S2	X	[mm10]chrX:101735684-101735744	398	GCGGCTCTTATATACTACCGAGTTATGAGCCACCACATCGTGCTGATGCTCAGTTTTCAAACAAACTGCTCCTCCACTAAACGAGATTAGTTCTTTAGCG
Ogt_G50_S2	X	[mm10]chrX:101735792-101735852	399	GCGGCTCTTATATACTACCGTCGTCTCTTCCTATGGACAGGTGGGACACTTCTCTGAAACAACCACCACCTGCAGGGCTCCGCAGATTTACCATTAGTCG
Ogt_G50_S2	X	[mm10]chrX:101735855-101735915	400	GCGGCTCTTATATACTACCGTGAAAAGGACCCGAGGTCTTAGACGAGGTCAGGAGCTGTGTGTATGGAGGGGACTAAGGACGCAGATTTACCATTAGTCG
Ogt_G50_S2	X	[mm10]chrX:101735963-101736023	401	GCGGCTCTTATATACTACCGACTATAGAGACAGAGATGACAGAAGCCTGGAAAACACGACAAAATTGCTTTAGTGCCCACACGAGATTAGTTCTTTAGCG
Ogt_G50_S2	X	[mm10]chrX:101736026-101736086	402	GCGGCTCTTATATACTACCGGACCACAGTTTCCCCATGCCTGTCTGTGACTTATGCAAATGAGAAAAATAACTGTAAAGGACGAGATTAGTTCTTTAGCG
Ogt_G50_S2	X	[mm10]chrX:101736134-101736194	403	GCGGCTCTTATATACTACCGCCGCATCCCATTTTTTGGCTTTAAAGGGAACTTTTGCTTTATGAAAGAAAAGGTAGTGAACGCAGATTTACCATTAGTCG
Ogt_G50_S2	X	[mm10]chrX:101736197-101736257	404	GCGGCTCTTATATACTACCGAGATGGTCATTTTAGAAATGCCTCATGGTGGCAGAAGCCAGCCCCTCAGTGTGCCTCTTCCGCAGATTTACCATTAGTCG
Ogt_G50_S2	X	[mm10]chrX:101736305-101736365	405	GCGGCTCTTATATACTACCGGGGTCCCCTAATCTCCTTCCTGGCCCTTAGTCTCCCCATTTGTCCTCATTGATCTTTACCACGAGATTAGTTCTTTAGCG
Ogt_G50_S2	X	[mm10]chrX:101736368-101736428	406	GCGGCTCTTATATACTACCGCCAGGTTGCAGGGAGGGATGCTGGACTGAAGGTCATGTGTAGAGAAGCCTTCCTTTCTGAACGAGATTAGTTCTTTAGCG
Ogt_G50_S2	X	[mm10]chrX:101736476-101736536	407	GCGGCTCTTATATACTACCGCTCTTGGTTTGCTTGAGTGACTTGTATATCTGTCTTGGGGGTGGCAGAGCACCGACCTTGCGCAGATTTACCATTAGTCG
Ogt_G50_S2	X	[mm10]chrX:101736539-101736599	408	GCGGCTCTTATATACTACCGGGACTCCAGGCCTAGTTCCACCCTACGAGCCCTCTGAGATCTTGGACAGATCAGAACCATCGCAGATTTACCATTAGTCG
Ogt_G50_S2	X	[mm10]chrX:101736647-101736707	409	GCGGCTCTTATATACTACCGCCATAGGCTTAAGCATCTAGCACGGGGGCCAAGGGCTTCGCACAGGTGCAGCCGAGGGCCACGAGATTAGTTCTTTAGCG
Ogt_G50_S2	X	[mm10]chrX:101736710-101736770	410	GCGGCTCTTATATACTACCGAGTAAGTAAATGCAGACCCCAGAACCAGGACTACCTAGAACTTTCCATGCCAAGAGAGCCACGAGATTAGTTCTTTAGCG
Ogt_G50_S2	X	[mm10]chrX:101736818-101736878	411	GCGGCTCTTATATACTACCGAGGGCCAGTGGGCTAGTCCTCCATGAAAGTGGTTGGTCTCTGGCCTCAATTGATAGAGCACGCAGATTTACCATTAGTCG
Ogt_G50_S2	X	[mm10]chrX:101736881-101736941	412	GCGGCTCTTATATACTACCGTCTGCCAGTTCTAGCTAAATTCCTTGGCTGTCCAGCTATTGACCCTGGGCAAGCATCTCACGCAGATTTACCATTAGTCG
Ogt_G50_S2	X	[mm10]chrX:101736989-101737049	413	GCGGCTCTTATATACTACCGATGCATTTGATGGGACTGCTTTATGGACTGTGCACCATATGCGTGGCAAGTCTGTGGCAAACGAGATTAGTTCTTTAGCG
Ogt_G50_S2	X	[mm10]chrX:101737052-101737112	414	GCGGCTCTTATATACTACCGTGGGTGCCCAGTTAGTGGCTTGCTCCTCCTCTTCTGGGACCAACCCAACTCCCAAGTCTCACGAGATTAGTTCTTTAGCG
Ogt_G50_S2	X	[mm10]chrX:101737160-101737220	415	GCGGCTCTTATATACTACCGGGAAGGTTCCTGGGTCACAGAGCTGAGCCAACCCCTCACCTGGCCTTCTAATTTGGTTCTCGCAGATTTACCATTAGTCG
Ogt_G50_S2	X	[mm10]chrX:101737223-101737283	416	GCGGCTCTTATATACTACCGTCATCCCAAGACAAGGTCAGAGGCAACTACCTAGCCAAAAGCTCACAGCCTGTGTTCTGGCGCAGATTTACCATTAGTCG
Ogt_G50_S2	X	[mm10]chrX:101737331-101737391	417	GCGGCTCTTATATACTACCGAGTCAGAGTGAAGCTGCCTGGGGCCTCATCAGTGGTCAAGGTGTGAAATGTGCACCTGGCACGAGATTAGTTCTTTAGCG
Ogt_G50_S2	X	[mm10]chrX:101737394-101737454	418	GCGGCTCTTATATACTACCGTCTCTGCCTCCCCTCCCCCTGTTGTTTTTCATTCTTTCACACCTCTGAGCTGTGGTTTGGACGAGATTAGTTCTTTAGCG
Ogt_G50_S2	X	[mm10]chrX:101737502-101737562	419	GCGGCTCTTATATACTACCGGGAAGGAGGGCCCCCTCATCAGGAACAGGGGTCATTTCCTTCTCTCTCCCAGCCTCTGCTCGCAGATTTACCATTAGTCG
Ogt_G50_S2	X	[mm10]chrX:101737565-101737625	420	GCGGCTCTTATATACTACCGCAGCCACACAATAGCCTCCCTAGTCATGTTTCCAAAAGCTCCCTAACTCAGTTGTCAGCCCGCAGATTTACCATTAGTCG
Ogt_G50_S2	X	[mm10]chrX:101737673-101737733	421	GCGGCTCTTATATACTACCGGGTGTCTCATCTCTGGGCATCTTCCTTCCACACTCCTAAGTCTTGAGGCTTTCTCCCCTTACGAGATTAGTTCTTTAGCG
Ogt_G50_S2	X	[mm10]chrX:101737736-101737796	422	GCGGCTCTTATATACTACCGCCCAGATTTCCCAAGGGAAGGAGCACTCAAGTTACAAGAAGACCCAGGGACGGGGAGACCACGAGATTAGTTCTTTAGCG
Ogt_G50_S2	X	[mm10]chrX:101737844-101737904	423	GCGGCTCTTATATACTACCGATGGCTTCTCAGCCTTCGGGGAGTCAACCCTTTCAAAGTGTGCTAGGGCCGAGGGACTGACGCAGATTTACCATTAGTCG
Ogt_G50_S2	X	[mm10]chrX:101737907-101737967	424	GCGGCTCTTATATACTACCGGGTCAGGCATATTTTTGGCAGTTGTGCCAAGGCTGCTTCTATCTTGGGAGCTGGGTGAGCCGCAGATTTACCATTAGTCG
Ogt_G50_S2	X	[mm10]chrX:101738015-101738075	425	GCGGCTCTTATATACTACCGTAACCTCAGGTGCTGTTCTAAGTGGCTCGATGTTGCTATTGTGTTAGGTTTGACATAAAGACGAGATTAGTTCTTTAGCG
Ogt_G50_S2	X	[mm10]chrX:101738078-101738138	426	GCGGCTCTTATATACTACCGATGCTGCCCAGGCTGACTTCATACCACTGTTAGGTTCCAAACGCTCTAAAATGGCACTGCACGAGATTAGTTCTTTAGCG
Ogt_G50_S2	X	[mm10]chrX:101738186-101738246	427	GCGGCTCTTATATACTACCGACAGACAGACAAAGGCTCACAGTCAGCATTCCTCCCAAACCTGTGTCTGTTGTCAGGAGGCGCAGATTTACCATTAGTCG
Ogt_G50_S2	X	[mm10]chrX:101738249-101738309	428	GCGGCTCTTATATACTACCGCACTAATTCCCTACCTCTGGCAACCTCTGCAAATGGGGCATCTGCTTCCCTGTAGCACATCGCAGATTTACCATTAGTCG
Ogt_G50_S2	X	[mm10]chrX:101738357-101738417	429	GCGGCTCTTATATACTACCGTTCCCTAACCCTCCAGGTGGTTCTGGCTTGCACACCTCCCTCCCTGTAGCTACTCCCCCTACGAGATTAGTTCTTTAGCG
Ogt_G50_S2	X	[mm10]chrX:101738420-101738480	430	GCGGCTCTTATATACTACCGCGACTGGCAAGGCTTTCTCTACCCTTTTGCTGTCCCTCTTGCTGTCCCCGAGAGGTAGCCACGAGATTAGTTCTTTAGCG
Ogt_G50_S2	X	[mm10]chrX:101738528-101738588	431	GCGGCTCTTATATACTACCGTCCCACAAGAGGGAGCCATGGCAATTTTGAACTTTTCCTAAATAAACTTTTCTTTTTCCCCGCAGATTTACCATTAGTCG
Ogt_G50_S2	X	[mm10]chrX:101738591-101738651	432	GCGGCTCTTATATACTACCGCATGATGGAGTGGTTGAGTTCGGTGGTTTCACTGTGCCCTTGTTTACAACCACTGAGCTGCGCAGATTTACCATTAGTCG
Ogt_G50_S2	X	[mm10]chrX:101738699-101738759	433	GCGGCTCTTATATACTACCGGAGATTCCCGTCTTCACACCAGTGGTTAGGGACTCATTTTCATGTCTTCTCAAACTTCCCACGAGATTAGTTCTTTAGCG
Ogt_G50_S2	X	[mm10]chrX:101738762-101738822	434	GCGGCTCTTATATACTACCGCTTTCTTTCTATCCTGCCTCACTTGAACTCTCTGAACTGCTGGAAAATAACTCAGTTAGTACGAGATTAGTTCTTTAGCG
Ogt_G50_S2	X	[mm10]chrX:101738870-101738930	435	GCGGCTCTTATATACTACCGGACCCTGTGCATGGTGCTGTGGCACTAGCTCTGCCTCTTATTACATCTGAGCTCCGATTTCGCAGATTTACCATTAGTCG
Ogt_G50_S2	X	[mm10]chrX:101738933-101738993	436	GCGGCTCTTATATACTACCGCATCTAGGCAGGAATCCATCTGCATAAGGCACAGGCAGCAGGGCTCTGCCTGTCAGAGCCCGCAGATTTACCATTAGTCG
Ogt_G50_S2	X	[mm10]chrX:101739041-101739101	437	GCGGCTCTTATATACTACCGTAGTGAGTCAGGCTGAATTGTGTTATTGGCGCTGCCATTTACTAGTGGCCCCACCACGTGACGAGATTAGTTCTTTAGCG
Ogt_G50_S2	X	[mm10]chrX:101739104-101739164	438	GCGGCTCTTATATACTACCGTTTATTTCATCTCCCTGTGTCTTATTTTTCCCCTCTGGGTCAGAAGAGAAAACTATACTGACGAGATTAGTTCTTTAGCG
Ogt_G50_S2	X	[mm10]chrX:101739212-101739272	439	GCGGCTCTTATATACTACCGGGTGGCAGCTCAGCTTCCTACCACTGCTGAACACACCCAGGGAAACAGCTTCATTTGCCTCGCAGATTTACCATTAGTCG
Ogt_G50_S2	X	[mm10]chrX:101739275-101739335	440	GCGGCTCTTATATACTACCGGTCACCACATACTGGAAAATCAAAGTCTTGAACTTGTATGAGGTTTGGAATTGTAATGGCCGCAGATTTACCATTAGTCG
Ogt_G300_S2	X	[mm10]chrX:101640783-101640843	1	GTCGAATATACGTCTGTCGATTCGGTGTAATCCTAGCCTCACTTTGCATCAGGCATGACTAGCGAAGGCTCCTCGGTGTGACGAGATTAGTTCTTTAGCG
Ogt_G300_S2	X	[mm10]chrX:101640846-101640906	2	GTCGAATATACGTCTGTCGACCAAGTAGCACCAAGAAGAGCTACTTGAGCCCGCACCCCGCCGGGGCAGCGCCTTGTGTTACGAGATTAGTTCTTTAGCG
Ogt_G300_S2	X	[mm10]chrX:101641196-101641256	3	GTCGAATATACGTCTGTCGACATCCCCATTCTTTAGCCCAGTATCTCTTTATCCATAGGGTGTGCATTATTATTTCTTTTCGCAGATTTACCATTAGTCG
Ogt_G300_S2	X	[mm10]chrX:101641259-101641319	4	GTCGAATATACGTCTGTCGAAGTTTCCATCCTTGCTTGAAGAGTTTGTAAAGCAACTGGAGTGTAGCTGCACAAGTGCAACGCAGATTTACCATTAGTCG
Ogt_G300_S2	X	[mm10]chrX:101641695-101641755	5	GTCGAATATACGTCTGTCGATGGTCATTTCCAGTATTAAAAGAGCAGATATGTGACTTTGGAAAGTGATAGGTAATGTGCACGAGATTAGTTCTTTAGCG
Ogt_G300_S2	X	[mm10]chrX:101641761-101641821	6	GTCGAATATACGTCTGTCGATAGGAGCTAGAAAGTGCTACGTTCTTGTCTAACATGTAATTTTCTAGTTGATCTTCTAGCACGAGATTAGTTCTTTAGCG
Ogt_G300_S2	X	[mm10]chrX:101642181-101642241	7	GTCGAATATACGTCTGTCGAAGATTGTTGCCTGGTTATTGAATAGGGTTGTTTTTAATGTCTTAGTACTTCTGTGAGAGCCGCAGATTTACCATTAGTCG
Ogt_G300_S2	X	[mm10]chrX:101642244-101642304	8	GTCGAATATACGTCTGTCGAGAACACAGCAGAAAATGTAAGGCAGCGTGGGTGGGATTTAGCTAATTTGGGCTCCTGAGTCGCAGATTTACCATTAGTCG
Ogt_G300_S2	X	[mm10]chrX:101642973-101643033	9	GTCGAATATACGTCTGTCGACAGAACCAACGAAACGTATGCTTTCCTTCCAAGGGTTAGCTGAGTTGGCACATCGAGAATACGAGATTAGTTCTTTAGCG
Ogt_G300_S2	X	[mm10]chrX:101643036-101643096	10	GTCGAATATACGTCTGTCGAAGGCAGGAGATTTTGAGGCAGCTGAGAGACACTGCATGCAGCTCTGGAGACAAGAGCCTGACGAGATTAGTTCTTTAGCG
Ogt_G300_S2	X	[mm10]chrX:101643394-101643454	11	GTCGAATATACGTCTGTCGATCAGGTAATTATTCTTAGTGTACATCTGAGCATCCAGACCTGTCAGCTTGAGGGACTCTGCGCAGATTTACCATTAGTCG
Ogt_G300_S2	X	[mm10]chrX:101643457-101643517	12	GTCGAATATACGTCTGTCGAGGAGGGGCATATGTAGCTCAGATTGGAAATACCCTTATTAAATTGTTGTTGCTTTTAGCTCGCAGATTTACCATTAGTCG
Ogt_G300_S2	X	[mm10]chrX:101643829-101643889	13	GTCGAATATACGTCTGTCGACTGCTGTTTGCTAGTTAAAGGATAATGTTCCATAGCACAAGATTTTCCATTGCATATGAGACGAGATTAGTTCTTTAGCG
Ogt_G300_S2	X	[mm10]chrX:101643892-101643952	14	GTCGAATATACGTCTGTCGATGCCTCCTTTTCTCTGACATGCATATCCATGCATCAACACTTTTTATTTTTCCAGATCTGACGAGATTAGTTCTTTAGCG
Ogt_G300_S2	X	[mm10]chrX:101644181-101644241	15	GTCGAATATACGTCTGTCGAGTACAATCCTGTAAGTAAACGTTTATTAGTTGCTTTCCTTTCACAGCACTCCAGAAAACACGCAGATTTACCATTAGTCG
Ogt_G300_S2	X	[mm10]chrX:101644246-101644306	16	GTCGAATATACGTCTGTCGAGCATCGTTTGATACTTCAGATAATAGGGGTTTTTTTCATGAAAGTCAAGAGTTGAGAGAGCGCAGATTTACCATTAGTCG
Ogt_G300_S2	X	[mm10]chrX:101645379-101645439	17	GTCGAATATACGTCTGTCGATGTAAAAATTGCCCTGGAAACTGTTGATGGTAATGAAGGGAAGGTGGCTGTAAGCTTTTAACGAGATTAGTTCTTTAGCG
Ogt_G300_S2	X	[mm10]chrX:101645442-101645502	18	GTCGAATATACGTCTGTCGAGGTAAGTAGTAGGGGTGGGGGATGGGTCTTGGCATGCACTTGAGTTAAGTTGACATTGAGACGAGATTAGTTCTTTAGCG
Ogt_G300_S2	X	[mm10]chrX:101645761-101645821	19	GTCGAATATACGTCTGTCGAACATGAATGAAAAATGAAAGCTAAAAAGGGCCTTCTTTGCCCCAAAGCAGCCATTGAGCACGCAGATTTACCATTAGTCG
Ogt_G300_S2	X	[mm10]chrX:101645824-101645884	20	GTCGAATATACGTCTGTCGACCTGGAAACCATTAGACATATAAGCCTGCCTCTTGACTCTAATTTTATAGTTTAGGAAACCGCAGATTTACCATTAGTCG
Ogt_G300_S2	X	[mm10]chrX:101646187-101646247	21	GTCGAATATACGTCTGTCGATGCATAGACTTGGAGATAATTAGAGCAATTTCTCGTGTGTTCTTTCAGAGATATTCAGTGACGAGATTAGTTCTTTAGCG
Ogt_G300_S2	X	[mm10]chrX:101646254-101646314	22	GTCGAATATACGTCTGTCGAGAACTTAGAATGTATTTGTAATTAGTTTTAGGCAGCTAACCTTGAATGTGTTGCCTGTGGACGAGATTAGTTCTTTAGCG
Ogt_G300_S2	X	[mm10]chrX:101646646-101646706	23	GTCGAATATACGTCTGTCGAAACTCTGTTAATTTATTTTGAGAGGGGATCTTTCAAATAGGTCTCTGTTAGTCAGGTTGGCGCAGATTTACCATTAGTCG
Ogt_G300_S2	X	[mm10]chrX:101646709-101646769	24	GTCGAATATACGTCTGTCGACCAACTCACCAAGTAGCTGAGGGTGACCTTGAACAAGGTAGCTCTCCCGGCCCTCTTCCCCGCAGATTTACCATTAGTCG
Ogt_G300_S2	X	[mm10]chrX:101647067-101647127	25	GTCGAATATACGTCTGTCGAGAGGTGCTTCTTTATTTCGCTGTTCTTCACAATAATAATGAAGGTGGGGTTCCGTGAACTACGAGATTAGTTCTTTAGCG
Ogt_G300_S2	X	[mm10]chrX:101647130-101647190	26	GTCGAATATACGTCTGTCGATGGATCTCACCGAAATGCACCACAGTGGTTGTGTTTAAAGTTTTCACATATCTAATCCTAACGAGATTAGTTCTTTAGCG
Ogt_G300_S2	X	[mm10]chrX:101647505-101647565	27	GTCGAATATACGTCTGTCGATTGGAACTGCCTTCTGTAATGCTTTATGGCTTAATAGATTTGCTGAAACTTTAGCTTGTCCGCAGATTTACCATTAGTCG
Ogt_G300_S2	X	[mm10]chrX:101647568-101647628	28	GTCGAATATACGTCTGTCGATTTTAAGGTGCTGTTTCTTCTGGTGTTCTCTTAGAATTGCCCGTACTTGGCAATTCCTTTCGCAGATTTACCATTAGTCG
Ogt_G300_S2	X	[mm10]chrX:101647926-101647986	29	GTCGAATATACGTCTGTCGAAGAATGTGTTCTGGAGGGGTTATCATGTGAGACAGACCTGACCCATGAAGGAGAAAAAGGACGAGATTAGTTCTTTAGCG
Ogt_G300_S2	X	[mm10]chrX:101647989-101648049	30	GTCGAATATACGTCTGTCGAAAAACTCCTTGGGTGATTATTGTTGGAGAGTATTAATCAGAAGGTTCCCTTGAGAGGCTGACGAGATTAGTTCTTTAGCG
Ogt_G300_S2	X	[mm10]chrX:101648347-101648407	31	GTCGAATATACGTCTGTCGACGGCACAGCTGTGGAGTTTGAGTTTAATTTGAGAGGCAGTTGAGAAGCACTGTAGGTTCTCGCAGATTTACCATTAGTCG
Ogt_G300_S2	X	[mm10]chrX:101648410-101648470	32	GTCGAATATACGTCTGTCGATGGCCTGGTTTTCCTCTATGTGTACATATGTAGAGGAATGTTAAGGGGGTCCAAGAGGTGCGCAGATTTACCATTAGTCG
Ogt_G300_S2	X	[mm10]chrX:101648781-101648841	33	GTCGAATATACGTCTGTCGAAAAGTTACTAAGGATGGGCAGAACAAGCCAGGTTTAGGAAAGTGATTCTCTTAGTATTATACGAGATTAGTTCTTTAGCG
Ogt_G300_S2	X	[mm10]chrX:101648848-101648908	34	GTCGAATATACGTCTGTCGATGACAGATAAAGCTGAATCTGATGCAGAGTTCTGAATGGATTCTTTTTGAGAATTGTAGCACGAGATTAGTTCTTTAGCG
Ogt_G300_S2	X	[mm10]chrX:101649257-101649317	35	GTCGAATATACGTCTGTCGAGACCTTGAATTTGTGATTATCCTGCTCCCATGTGCTGGGATTATTGACAAGTGCCACCATCGCAGATTTACCATTAGTCG
Ogt_G300_S2	X	[mm10]chrX:101649324-101649384	36	GTCGAATATACGTCTGTCGAGAAAGATAGTTATTTTGTTTGTATTTGTAATACCAGGGATCAAACTCAGGGCACGTGTTCCGCAGATTTACCATTAGTCG
Ogt_G300_S2	X	[mm10]chrX:101649682-101649742	37	GTCGAATATACGTCTGTCGATTGATGGCCGACTAGGCCATCTATGTTTTGCCTTTTCTTAAAGTGGACTTACTATTTTACACGAGATTAGTTCTTTAGCG
Ogt_G300_S2	X	[mm10]chrX:101649745-101649805	38	GTCGAATATACGTCTGTCGAAACCTTGAAGGTATTTATATTCTCATCTTTTTACAGCTCTGAAGAGCAAACATGGGGCCTACGAGATTAGTTCTTTAGCG
Ogt_G300_S2	X	[mm10]chrX:101650169-101650229	39	GTCGAATATACGTCTGTCGACTTAAAAAATACAGCCACTAGACAGTTGTTATGATGATTCTGAAATTTATGGCTCCGAGCCGCAGATTTACCATTAGTCG
Ogt_G300_S2	X	[mm10]chrX:101650232-101650292	40	GTCGAATATACGTCTGTCGACATAGAAATTGGGGAAAGTCAAGAGATGCTTATTACCCGCAAAAGTAGAAGGAACTTGTACGCAGATTTACCATTAGTCG
Ogt_G300_S2	X	[mm10]chrX:101650589-101650649	41	GTCGAATATACGTCTGTCGATTAGAGTGAGGGTAGGGGCTTGAACTCACGACGATATTCCTGCCTCAGTTTCCCAAGTGCACGAGATTAGTTCTTTAGCG
Ogt_G300_S2	X	[mm10]chrX:101650652-101650712	42	GTCGAATATACGTCTGTCGAAATTACAGGTGCATGCTACGGTACCTGGCACACATTGATGATTTGGGGATTAATGTCAGCACGAGATTAGTTCTTTAGCG
Ogt_G300_S2	X	[mm10]chrX:101651012-101651072	43	GTCGAATATACGTCTGTCGACCACATGACAGTTCGGGATGATAAACGTCCTTCATGTTGCCATCATCTCTGCTTGTTAGTCGCAGATTTACCATTAGTCG
Ogt_G300_S2	X	[mm10]chrX:101651079-101651139	44	GTCGAATATACGTCTGTCGAAAATTCCACTGACAAAAGCAGACTTTGCAAGTAAAAATTTCAGCTTACTGTCTGTTGAGCCGCAGATTTACCATTAGTCG
Ogt_G300_S2	X	[mm10]chrX:101651428-101651488	45	GTCGAATATACGTCTGTCGACCCTGGAAAATTTCTGGTCCTTGATATAGGAGTGATTCATCATAACCTTGAATAAAACAGACGAGATTAGTTCTTTAGCG
Ogt_G300_S2	X	[mm10]chrX:101651492-101651552	46	GTCGAATATACGTCTGTCGAATAAATATTCAATCATTTTTTTTTCCAAAGGGTGACGTTTGGAGAGGAGAGAGGCTCTAGACGAGATTAGTTCTTTAGCG
Ogt_G300_S2	X	[mm10]chrX:101652308-101652368	47	GTCGAATATACGTCTGTCGATATGAAACTGAGAAAAACTGTTGGCATGACTTGCCTCAGACTAGAGCAGGACTGGGCTTTCGCAGATTTACCATTAGTCG
Ogt_G300_S2	X	[mm10]chrX:101652371-101652431	48	GTCGAATATACGTCTGTCGACATAATCTGTTCTAAATCTGGGGGTAAAGCAAGACCGTGAGCATTGTGGAGCCTTTCTACCGCAGATTTACCATTAGTCG
Ogt_G300_S2	X	[mm10]chrX:101652729-101652789	49	GTCGAATATACGTCTGTCGAAACATTGCAAATTAATAATTGGAACATCCTGCCCCTCTTGTCCCCACTTCCTCCTCAAATACGAGATTAGTTCTTTAGCG
Ogt_G300_S2	X	[mm10]chrX:101652792-101652852	50	GTCGAATATACGTCTGTCGATTTCCCCCTTTCCCCCAGTCCTAGTTGTCTATCTTTTTTTTTCTTCCTCACTTCCTTTTCACGAGATTAGTTCTTTAGCG
Ogt_G300_S2	X	[mm10]chrX:101653150-101653210	51	GTCGAATATACGTCTGTCGATGCTCTGAGCCCCACGCGCATGCTAATGCGTGGAGTGTATGCGCAGCGTAGCTGTCTGTTCGCAGATTTACCATTAGTCG
Ogt_G300_S2	X	[mm10]chrX:101653213-101653273	52	GTCGAATATACGTCTGTCGACTGCTCATCCAGGGAGGGCGAAGGCTTTTCAGCAGCACCTAATGTTTAAAAAGGCACTAGCGCAGATTTACCATTAGTCG
Ogt_G300_S2	X	[mm10]chrX:101653941-101654001	53	GTCGAATATACGTCTGTCGATGTTTTTGGTTTTTCACCATTGATATTGTATTTAGAAGGTTTCAGGTGGGTGAAACCTCCACGAGATTAGTTCTTTAGCG
Ogt_G300_S2	X	[mm10]chrX:101654004-101654064	54	GTCGAATATACGTCTGTCGATCCATGCGTAAGGTGCCTCGCTGAAGGGAGCTCGAGGCCTGGATCTAGGGCAGACACACAACGAGATTAGTTCTTTAGCG
Ogt_G300_S2	X	[mm10]chrX:101654362-101654422	55	GTCGAATATACGTCTGTCGATCTTCTTTGTTTGGATTGCAGCATTCTGCTCTTCTGATGATGCGCTGTGACCCTGCAGTACGCAGATTTACCATTAGTCG
Ogt_G300_S2	X	[mm10]chrX:101654425-101654485	56	GTCGAATATACGTCTGTCGACAAAGGCTGCGCAGCGTTAATGCGCATTGCGTGCGAATGAGCCCCTGTGAACGGTTGACTCGCAGATTTACCATTAGTCG
Ogt_G300_S2	X	[mm10]chrX:101654783-101654843	57	GTCGAATATACGTCTGTCGACTTTCTCCTCAGAAGAGAGAGAGGTGTTGTGAGTCTGAAACTTAAAGCCTAAGTGATAACACGAGATTAGTTCTTTAGCG
Ogt_G300_S2	X	[mm10]chrX:101654846-101654906	58	GTCGAATATACGTCTGTCGAGGACTTGGCAGACACATTTTTGTATGGCTCAGTAGCTTGCTTTTGGTCATAAGAATGTGAACGAGATTAGTTCTTTAGCG
Ogt_G300_S2	X	[mm10]chrX:101655204-101655264	59	GTCGAATATACGTCTGTCGAAAATAATACATTTTGGGAAATGTGGGCTGGGGAAGCTTAGACTTCATGTGTCCTCTTGATCGCAGATTTACCATTAGTCG
Ogt_G300_S2	X	[mm10]chrX:101655267-101655327	60	GTCGAATATACGTCTGTCGACAATCTCTAGGGCCCATATAGGTGTTCAGATAAGAGGAGTCTGGCATTACTGTTTAGCAGCGCAGATTTACCATTAGTCG
Ogt_G300_S2	X	[mm10]chrX:101655625-101655685	61	GTCGAATATACGTCTGTCGACATGTTATTTGAAAGCAATTGAGACGCAACCAAACTTTGCAGTAGCCTGGAGTAATCTCGACGAGATTAGTTCTTTAGCG
Ogt_G300_S2	X	[mm10]chrX:101655688-101655748	62	GTCGAATATACGTCTGTCGAGTGTTTTCAATGCACAAGGGGAGATTTGGCTGGCTATTCATCACTTTGAAAAGGTTAGTCACGAGATTAGTTCTTTAGCG
Ogt_G300_S2	X	[mm10]chrX:101656046-101656106	63	GTCGAATATACGTCTGTCGAGAGCGCTCAGATTACAGACATGAATGAACTGCCCCTATCTGGTTTTAAAATGCCATTTCCCGCAGATTTACCATTAGTCG
Ogt_G300_S2	X	[mm10]chrX:101656109-101656169	64	GTCGAATATACGTCTGTCGAAAAAGAAGTAGGTATGTCTTCAGCGTGAAGCAGTGCTTAGGGGCTGTAGAGGGATCCATTCGCAGATTTACCATTAGTCG
Ogt_G300_S2	X	[mm10]chrX:101656419-101656479	65	GTCGAATATACGTCTGTCGAAAGTGTTTCTGTCACCATGTGGGTGCTGGGAACTGATTTAACCTCTTCAGTGCTGGTATTACGAGATTAGTTCTTTAGCG
Ogt_G300_S2	X	[mm10]chrX:101656482-101656542	66	GTCGAATATACGTCTGTCGACGTAGGTGCCACCACATCTGGCAGTTTTGGTCTTCTTTTTTTGGTTTTTCAAGACAGGGTACGAGATTAGTTCTTTAGCG
Ogt_G300_S2	X	[mm10]chrX:101656894-101656954	67	GTCGAATATACGTCTGTCGATACAGGTGATTGTGAGCCACCATGTGGTTGCTGGAATGCTGGGGAAGGTAAAACTCAAGTCGCAGATTTACCATTAGTCG
Ogt_G300_S2	X	[mm10]chrX:101656957-101657017	68	GTCGAATATACGTCTGTCGAGAGTCTAAATAAATATCGGGCTGGGGAAGGTAGAGAGGTAGTAGGATTCTTTGAATGCAGCGCAGATTTACCATTAGTCG
Ogt_G300_S2	X	[mm10]chrX:101657308-101657368	69	GTCGAATATACGTCTGTCGACAGTTGACTGTGGAATTAGTGAGTTATTTATTACACTGGATGGTGACCACATTTGTATGTACGAGATTAGTTCTTTAGCG
Ogt_G300_S2	X	[mm10]chrX:101657371-101657431	70	GTCGAATATACGTCTGTCGAATATATTTCAAAATTGCTACACATGGCTGTTTGAGCCCAGGAGTTCAAAGTGAACCTGGAACGAGATTAGTTCTTTAGCG
Ogt_G300_S2	X	[mm10]chrX:101657693-101657753	71	GTCGAATATACGTCTGTCGAAATTCAGTTCCCAGAACCCACGGTAGAAAGAGAAAACTACAGAGTGTCTTCAGACTCCCACGCAGATTTACCATTAGTCG
Ogt_G300_S2	X	[mm10]chrX:101657756-101657816	72	GTCGAATATACGTCTGTCGAGTGCATTTAGCATGGATGTGTTCTGCCAGCCATATACACAGCAACAACAATAAAAAAATACGCAGATTTACCATTAGTCG
Ogt_G300_S2	X	[mm10]chrX:101658114-101658174	73	GTCGAATATACGTCTGTCGACCTTTTGCCTCTACCTCCTCAATGCTAGGCATTTATAGGCACGCACTGCTAAGTCCAGGAACGAGATTAGTTCTTTAGCG
Ogt_G300_S2	X	[mm10]chrX:101658178-101658238	74	GTCGAATATACGTCTGTCGACAGAGATTTTAGGCAGGAAGTGGTGACACATGTCCTTGGTTCCAGCAAAGACAGGTGTATACGAGATTAGTTCTTTAGCG
Ogt_G300_S2	X	[mm10]chrX:101658535-101658595	75	GTCGAATATACGTCTGTCGACACTTTTAGGGGATCTTTGAAACAGGCTGTCTTGGAGCTTACCATGTAGACTAGGCTGGCCGCAGATTTACCATTAGTCG
Ogt_G300_S2	X	[mm10]chrX:101658598-101658658	76	GTCGAATATACGTCTGTCGAGGACTCAGAGCTATATTCCTTCATCTGTGGTTTTGATTGATCGTTTGATAGCATATACATCGCAGATTTACCATTAGTCG
Ogt_G300_S2	X	[mm10]chrX:101659016-101659076	77	GTCGAATATACGTCTGTCGATGAAGGAACAGTTGACTATTACCATTAGTAGGTTTAGGCATTTAACAGTGGCAAAGAAAGACGAGATTAGTTCTTTAGCG
Ogt_G300_S2	X	[mm10]chrX:101659079-101659139	78	GTCGAATATACGTCTGTCGAGCATTGGATGCTGTTCCTTGTGAATAGGACTAAATAATTCCATTGGTGAAGTTGACCCTCACGAGATTAGTTCTTTAGCG
Ogt_G300_S2	X	[mm10]chrX:101659442-101659502	79	GTCGAATATACGTCTGTCGAAGCCTGCATATGGAAGTTCCAACCATTTATGACTCTAGTCTCAGGGATCTGAAGCCCTCTCGCAGATTTACCATTAGTCG
Ogt_G300_S2	X	[mm10]chrX:101659509-101659569	80	GTCGAATATACGTCTGTCGATCTAAGGGTAACAGGCACGCAAGTGCACAGATATACATGTAGACAAAACAAGTGAGACAACGCAGATTTACCATTAGTCG
Ogt_G300_S2	X	[mm10]chrX:101659867-101659927	81	GTCGAATATACGTCTGTCGAAAAACCAGTCTTGTCTCCTCCCTAGGATTCATAATTTTAAAGGAGATGAGATGTTTGAGAACGAGATTAGTTCTTTAGCG
Ogt_G300_S2	X	[mm10]chrX:101659930-101659990	82	GTCGAATATACGTCTGTCGAGCTTCAGAATTATCTGGAGAAAGAGGGGGGTAGGTTAGAATATATACTAAATAAAAGCCAACGAGATTAGTTCTTTAGCG
Ogt_G300_S2	X	[mm10]chrX:101660755-101660815	83	GTCGAATATACGTCTGTCGATAAATTAACTGAAGACAATAGGGCCAAGCATTAGAAATACTTATATGGTAGCGCAAGCCTCGCAGATTTACCATTAGTCG
Ogt_G300_S2	X	[mm10]chrX:101660818-101660878	84	GTCGAATATACGTCTGTCGAATAGTAGCACTTGGGAGGTAGAGGCAGGTCTGAACTCAGGATCTCTGCAAGAGCAGTCAGCGCAGATTTACCATTAGTCG
Ogt_G300_S2	X	[mm10]chrX:101661208-101661268	85	GTCGAATATACGTCTGTCGAGATAAAATCCTATCTTTTTCTAACTGACTGTCTTCTAATTTTAGGCTGTCACCCTTGACCACGAGATTAGTTCTTTAGCG
Ogt_G300_S2	X	[mm10]chrX:101661273-101661333	86	GTCGAATATACGTCTGTCGATTTCTGGATGCTTATATCAATTTAGGAAATGTCTTGAAAGAGGCACGCATTTTTGACAGGACGAGATTAGTTCTTTAGCG
Ogt_G300_S2	X	[mm10]chrX:101662026-101662086	87	GTCGAATATACGTCTGTCGATTTTTGGCTAGGTTGCCAGTCAGTATACCTCAATGATCTCCTGTTGTAGTCCGGTGCTGACGCAGATTTACCATTAGTCG
Ogt_G300_S2	X	[mm10]chrX:101662089-101662149	88	GTCGAATATACGTCTGTCGATACATGCTTTTACATGGCCATACCTAGCTTGTTAGGTGGGTTCAGGGATCTAAACTCATACGCAGATTTACCATTAGTCG
Ogt_G300_S2	X	[mm10]chrX:101662447-101662507	89	GTCGAATATACGTCTGTCGAGAAAGCCGAGCAGGAACACACAAATGTTTTTCTCTGAAAATATGTTTTATAGTCTGGCACACGAGATTAGTTCTTTAGCG
Ogt_G300_S2	X	[mm10]chrX:101662510-101662570	90	GTCGAATATACGTCTGTCGAGGAGGCTGAAGCAGGAGGATTGCTGTGAGTTCAAGGCCAGGCCCTTGATAGAGTAAGAACACGAGATTAGTTCTTTAGCG
Ogt_G300_S2	X	[mm10]chrX:101662933-101662993	91	GTCGAATATACGTCTGTCGAATAAAACCCAACATATCCCAAAATAAAAACGCAGGGTCAACCATTTTTACTCAGTGGTAGCGCAGATTTACCATTAGTCG
Ogt_G300_S2	X	[mm10]chrX:101662996-101663056	92	GTCGAATATACGTCTGTCGACCTTGTTTAGCATGCATGAGGCCCTAAGTTCAGTTCTTAGCACCACAAAAAATATATTTTCGCAGATTTACCATTAGTCG
Ogt_G300_S2	X	[mm10]chrX:101663354-101663414	93	GTCGAATATACGTCTGTCGACACAGAGCTGTCGCAGCTTATCTTCGTGCCTTAAGTTTGAGCCCAAATCATGCGGTGGTGACGAGATTAGTTCTTTAGCG
Ogt_G300_S2	X	[mm10]chrX:101663417-101663477	94	GTCGAATATACGTCTGTCGAGGCAACCTGGCTTGTGTGTACTACGAGCAAGGCCTAATAGACCTGGCCATTGATACCTACACGAGATTAGTTCTTTAGCG
Ogt_G300_S2	X	[mm10]chrX:101663784-101663844	95	GTCGAATATACGTCTGTCGATAACAGTGGTCTCTTTGATTCTTCTGTGTAGTTTCTGAATGGTTTGTTTCATTTTCCAGGCGCAGATTTACCATTAGTCG
Ogt_G300_S2	X	[mm10]chrX:101663847-101663907	96	GTCGAATATACGTCTGTCGACTGAAGCAGAAGATTGTTATAACACAGCTCTTCGTCTGTGTCCTACTCATGCAGACTCTTCGCAGATTTACCATTAGTCG
Ogt_G300_S2	X	[mm10]chrX:101664205-101664265	97	GTCGAATATACGTCTGTCGATGGGGTTAATAAAGGTGTGCCCAACCACTGCTCAGCTGCCATTCACCTCTTTAAGAGGATACGAGATTAGTTCTTTAGCG
Ogt_G300_S2	X	[mm10]chrX:101664268-101664328	98	GTCGAATATACGTCTGTCGATCATTATTGATGTAAGGTCCTGTGGACATGTAAGACACCCCTATATTGAGCTCATTATGCACGAGATTAGTTCTTTAGCG
Ogt_G300_S2	X	[mm10]chrX:101664626-101664686	99	GTCGAATATACGTCTGTCGAGTGATCGGAACTCTGTAGGTCTTCCCAGAGTTTGCTGCTGCACATTCCAATTTAGCAAGTCGCAGATTTACCATTAGTCG
Ogt_G300_S2	X	[mm10]chrX:101664689-101664749	100	GTCGAATATACGTCTGTCGACTGCAACAGCAGGGCAAGCTGCAGGAAGCACTGATGCACTATAAAGAAGCCATACGGTAACGCAGATTTACCATTAGTCG
Ogt_G300_S2	X	[mm10]chrX:101665047-101665107	101	GTCGAATATACGTCTGTCGACTCTCTACAGAAGACTCTCTCAATCTCTTAGTATCACTTAGATTGCCTGTATATCTTTGCACGAGATTAGTTCTTTAGCG
Ogt_G300_S2	X	[mm10]chrX:101665110-101665170	102	GTCGAATATACGTCTGTCGAGGATTGACGCCTATCCCCCCACCCACCCAAATCCAGTTCAGCATCTTTTTGTTCTTTCTCACGAGATTAGTTCTTTAGCG
Ogt_G300_S2	X	[mm10]chrX:101665550-101665610	103	GTCGAATATACGTCTGTCGAAATTCCTGGTACCCATGTGGTAGCTCACAACCATCTATAAATCTAACCTAGGAAATCCTGCGCAGATTTACCATTAGTCG
Ogt_G300_S2	X	[mm10]chrX:101665613-101665673	104	GTCGAATATACGTCTGTCGATTCAAGGGCACCAGGCATATCATGTTACACAGCCATACATGTGGGCAAAACATCCACACACGCAGATTTACCATTAGTCG
Ogt_G300_S2	X	[mm10]chrX:101665986-101666046	105	GTCGAATATACGTCTGTCGACATGTCCTGGGTTTAAAGGCCTGTACTGCCATACTCGGCTTCCTTATTTTAAACCTAAAAACGAGATTAGTTCTTTAGCG
Ogt_G300_S2	X	[mm10]chrX:101666049-101666109	106	GTCGAATATACGTCTGTCGAATTAAAAATTATTCATCTGTATATGGGTATATGTTGTGCATGTAGGTCCCTACTGAGGCCACGAGATTAGTTCTTTAGCG
Ogt_G300_S2	X	[mm10]chrX:101666501-101666561	107	GTCGAATATACGTCTGTCGAGGAATAAAGGTGTGCGCCACCACACCTGGCCTGTTTTAATTTTTTAATAATTCTATTTCACGCAGATTTACCATTAGTCG
Ogt_G300_S2	X	[mm10]chrX:101666564-101666624	108	GTCGAATATACGTCTGTCGAATTTTGTGGGTGTGAGGAAATGTGGGCTTATACTGTAGTGCCCATGTGGAGGTCAGAGGACGCAGATTTACCATTAGTCG
Ogt_G300_S2	X	[mm10]chrX:101666922-101666982	109	GTCGAATATACGTCTGTCGAGTATTATATGTGTATAAAATGTGCATAAATTCCCTAAGTGGGTGCTTTATGCCCCTAGAGACGAGATTAGTTCTTTAGCG
Ogt_G300_S2	X	[mm10]chrX:101666985-101667045	110	GTCGAATATACGTCTGTCGAGACGTTGATGTTGGGAACAGAATTCAGGCTCTGGAAGAGCAATGAGAGTTCCTAATTGCTACGAGATTAGTTCTTTAGCG
Ogt_G300_S2	X	[mm10]chrX:101667343-101667403	111	GTCGAATATACGTCTGTCGATGCAGGGCGCTTTGCAGTGTTATACTCGTGCCATCCAGATTAATCCTGCCTTTGCTGATGCGCAGATTTACCATTAGTCG
Ogt_G300_S2	X	[mm10]chrX:101667406-101667466	112	GTCGAATATACGTCTGTCGAACAGCAATCTGGCCTCCATTCACAAGGTACTGTTGTTTATTCAAATATGGGGTACCTTAGCGCAGATTTACCATTAGTCG
Ogt_G300_S2	X	[mm10]chrX:101667764-101667824	113	GTCGAATATACGTCTGTCGAAGTCATAGGGCAGCTTTTAGGAGTCATTTCTTTTAGCACCTGGGTCCTAGGCATTGGACTACGAGATTAGTTCTTTAGCG
Ogt_G300_S2	X	[mm10]chrX:101667827-101667887	114	GTCGAATATACGTCTGTCGATGTCAGGTACGCAAGGTACGCCTTTTCTCAGCGAGCCAGCCGCAAGACCATGCTTGTAGGACGAGATTAGTTCTTTAGCG
Ogt_G300_S2	X	[mm10]chrX:101668219-101668279	115	GTCGAATATACGTCTGTCGAATAAATTAAATGTATGGCTTTACCAGCTAGAAATGAAACTGTCTTAGCTGCCCTTGAAGCCGCAGATTTACCATTAGTCG
Ogt_G300_S2	X	[mm10]chrX:101668282-101668342	116	GTCGAATATACGTCTGTCGATCTTCACTGTGGCTTCACTGTGGCCTGACTGCAGCGCAGTTCTTCGTTTCTAATGGTAGTCGCAGATTTACCATTAGTCG
Ogt_G300_S2	X	[mm10]chrX:101668644-101668704	117	GTCGAATATACGTCTGTCGACACAGAGAAAACCTGTCTCAGGGAGGAAAAAAAAAGGCAAGCTAAAGGCAAGGACAACAAACGAGATTAGTTCTTTAGCG
Ogt_G300_S2	X	[mm10]chrX:101668707-101668767	118	GTCGAATATACGTCTGTCGATCCTACATGGTGCTTAAATAGAGCATGTGAGAATTAGAACACGACTTTAGAAGTTTAGAGACGAGATTAGTTCTTTAGCG
Ogt_G300_S2	X	[mm10]chrX:101669009-101669069	119	GTCGAATATACGTCTGTCGAGAAGCATGCACACTGTGCAGCTGCCACAGAACTGCTGACCTAAACTGCTAAGGTGACATCCGCAGATTTACCATTAGTCG
Ogt_G300_S2	X	[mm10]chrX:101669072-101669132	120	GTCGAATATACGTCTGTCGACTGGCCACATGAACTAAATGAAGTTTGCTATCCAAAGTTTTTTTCATAGGTGTGGGTTTACGCAGATTTACCATTAGTCG
Ogt_G300_S2	X	[mm10]chrX:101669430-101669490	121	GTCGAATATACGTCTGTCGATCTACCTCACAATTACAGGGTCTCAGGGGTGCACCAACATGCTCATGTAGTTTTTGTCGTACGAGATTAGTTCTTTAGCG
Ogt_G300_S2	X	[mm10]chrX:101669493-101669553	122	GTCGAATATACGTCTGTCGATGTTTTGTCTCACTACATGATACTGGATGGCTGGTAACCCAGTGTGTAGGCTCAGCGATCACGAGATTAGTTCTTTAGCG
Ogt_G300_S2	X	[mm10]chrX:101669851-101669911	123	GTCGAATATACGTCTGTCGAGGAATCACCCTACTTCACACCTTATGCAGTCTATTCCAGGCATGCATAATCCTGATAAGTCGCAGATTTACCATTAGTCG
Ogt_G300_S2	X	[mm10]chrX:101669914-101669974	124	GTCGAATATACGTCTGTCGAAGGTAAGAATGGGTTTTTTGGTGGCTTTACCCTGTCATCTTCAGCATTAACTTCACTTCCCGCAGATTTACCATTAGTCG
Ogt_G300_S2	X	[mm10]chrX:101670274-101670334	125	GTCGAATATACGTCTGTCGAGGAAATACATCTTGGGTGTTAAGAAGATGAGGATTTCTTTCAAAGAAAGCAAAGGCTATGACGAGATTAGTTCTTTAGCG
Ogt_G300_S2	X	[mm10]chrX:101670337-101670397	126	GTCGAATATACGTCTGTCGAGGCCCCCATCTCATTAAAAATAAAACAACACAGTAGTAGAAAGTTGCCTTACCTATTTCTACGAGATTAGTTCTTTAGCG
Ogt_G300_S2	X	[mm10]chrX:101670778-101670838	127	GTCGAATATACGTCTGTCGATGAGCCATCTCACCAGCCCCCAGCTTTGTTGTTTCATTCTTTTGTAGGGTGGCAGGGGGACGCAGATTTACCATTAGTCG
Ogt_G300_S2	X	[mm10]chrX:101670841-101670901	128	GTCGAATATACGTCTGTCGATTGAGGCAGAGACTTACTATGCTCCTAACCCTGTCTGGCCTGAAATACACAATGTAGACCCGCAGATTTACCATTAGTCG
Ogt_G300_S2	X	[mm10]chrX:101671195-101671255	129	GTCGAATATACGTCTGTCGAGGGGACATAGTTAATGTAGTATAGTGCTTTCCTATTATACATGAAACCCTGGATTTGCTTACGAGATTAGTTCTTTAGCG
Ogt_G300_S2	X	[mm10]chrX:101671262-101671322	130	GTCGAATATACGTCTGTCGACTGTATAAACTGGGTGTTATGGCTCATACCTATAATCTCAGCATTTTTAGAGGTGGAGGCACGAGATTAGTTCTTTAGCG
Ogt_G300_S2	X	[mm10]chrX:101671544-101671604	131	GTCGAATATACGTCTGTCGAATGGGTGGCCACATCTGGCTTTTTATATGGATCCTGGAAGCCACACTCAGGTCATCTTGCCGCAGATTTACCATTAGTCG
Ogt_G300_S2	X	[mm10]chrX:101671607-101671667	132	GTCGAATATACGTCTGTCGATATAGGAAGCACTAGCACTCTTACTGAGTCTGTTATAGTCCTCTGTTTATACCACTTTCCCGCAGATTTACCATTAGTCG
Ogt_G300_S2	X	[mm10]chrX:101671891-101671951	133	GTCGAATATACGTCTGTCGAGCTTAGCTTCCTTTATTTTCTATCTCTGCAATGCTTTGATATTATAGCAGTCCTAAGCTCACGAGATTAGTTCTTTAGCG
Ogt_G300_S2	X	[mm10]chrX:101671954-101672014	134	GTCGAATATACGTCTGTCGAGTTGCCTAGTTCACTGACTTGGTTTTCATCTCCTTTTTTTTTTCCTTCAAACTTAGCCTGACGAGATTAGTTCTTTAGCG
Ogt_G300_S2	X	[mm10]chrX:101672329-101672389	135	GTCGAATATACGTCTGTCGACACTGGCCCTAGCTTTCCCATCTCTTTTTTTCATCTAGGTCTCTAAATTCTGTTTAATGTCGCAGATTTACCATTAGTCG
Ogt_G300_S2	X	[mm10]chrX:101672396-101672456	136	GTCGAATATACGTCTGTCGAACCAATTGTATTAATCTAAGATTCTACATCGTTCTTCCTGTGTGTTCCACAGATTCCTTGCGCAGATTTACCATTAGTCG
Ogt_G300_S2	X	[mm10]chrX:101672754-101672814	137	GTCGAATATACGTCTGTCGAAGTGGAAACAGGCATTTCATGGTTTTCTATTAACAGCTCCTTTGCTTAACACATTTGAAGACGAGATTAGTTCTTTAGCG
Ogt_G300_S2	X	[mm10]chrX:101672817-101672877	138	GTCGAATATACGTCTGTCGAACCTTAACACAAAGTTATTTGGAAAGGCTGCTGGATTGCTCTTGACTAATGAAACCAGCCACGAGATTAGTTCTTTAGCG
Ogt_G300_S2	X	[mm10]chrX:101673175-101673235	139	GTCGAATATACGTCTGTCGATTTATTGGTGATCATGCTAATATGTTCCCTCACCTGAAGGTAGGCAGAAAACAATGATATCGCAGATTTACCATTAGTCG
Ogt_G300_S2	X	[mm10]chrX:101673238-101673298	140	GTCGAATATACGTCTGTCGAGAAACCCCGAGAACTGTGTTTGATCCTCCCTTTGTTGTCCAGATTCACCTTTACGAAAAGCGCAGATTTACCATTAGTCG
Ogt_G300_S2	X	[mm10]chrX:101673596-101673656	141	GTCGAATATACGTCTGTCGAATGCCCGTTATTCCCATGAATACGATTGCAGAAGCAGTAATTGAAATGATTAACAGAGGGACGAGATTAGTTCTTTAGCG
Ogt_G300_S2	X	[mm10]chrX:101673659-101673719	142	GTCGAATATACGTCTGTCGAATTCAGATAACAATTAACGGATTCAGTATTAGCAATGGACTGGCGACTACACAGGTAAAAACGAGATTAGTTCTTTAGCG
Ogt_G300_S2	X	[mm10]chrX:101674715-101674775	143	GTCGAATATACGTCTGTCGATTAATCTCTAGTCTCTTTTTTTCCATACTCATTGATGCCAGCTTGCTGTGCTTTTGTAGGCGCAGATTTACCATTAGTCG
Ogt_G300_S2	X	[mm10]chrX:101674778-101674838	144	GTCGAATATACGTCTGTCGAGGGTGTACATTATATTCAGCACAATGCAGTGTAGTTCCTTGTATTTGTATCTTTCAGCAACGCAGATTTACCATTAGTCG
Ogt_G300_S2	X	[mm10]chrX:101675143-101675203	145	GTCGAATATACGTCTGTCGACGGAGAAGGCCACTTTATCAATGAACAGGGTAAAATGTAAAAGCTTACTATTGGTTATAGACGAGATTAGTTCTTTAGCG
Ogt_G300_S2	X	[mm10]chrX:101675206-101675266	146	GTCGAATATACGTCTGTCGATTTAGTTATTTCTGGTTGTTTTTTTGAGACAAAGTTTATTTTGGGTAGCCCTGCCTGTCCACGAGATTAGTTCTTTAGCG
Ogt_G300_S2	X	[mm10]chrX:101675564-101675624	147	GTCGAATATACGTCTGTCGAGGCCACTCTGGACTATATATATAGCAAGTTCCAGGCAACCCAAAGCTACTTGAGACCCTGCGCAGATTTACCATTAGTCG
Ogt_G300_S2	X	[mm10]chrX:101675627-101675687	148	GTCGAATATACGTCTGTCGATAAACAAACAAAAAAAGAAAGGCCAAGTCTTGCATAGTGGCACACCACTGTAAGCCTAGCCGCAGATTTACCATTAGTCG
Ogt_G300_S2	X	[mm10]chrX:101675985-101676045	149	GTCGAATATACGTCTGTCGAATTATAGGTAAGTATACCACCATGCCTTGTTTTATGCAGTACTTGACTCAAAACCAGGGCACGAGATTAGTTCTTTAGCG
Ogt_G300_S2	X	[mm10]chrX:101676048-101676108	150	GTCGAATATACGTCTGTCGATTGCATGCTTGGCAAGCCCTATAGCAGCTAAACTACACCTACAACCCCCTTAGCCTGTGTACGAGATTAGTTCTTTAGCG
Ogt_G300_S2	X	[mm10]chrX:101676495-101676555	151	GTCGAATATACGTCTGTCGACCCGCCAAACCCTCCCATACATACTCCCTTTTCTCTTTCAAATTCATGGCTTTTTCTTTACGCAGATTTACCATTAGTCG
Ogt_G300_S2	X	[mm10]chrX:101676558-101676618	152	GTCGAATATACGTCTGTCGAGTTGTTGCTTTTATTCTTTAGTAGTAGTATTTGTTGGTGGTGGTCTGTGTGTGATGTGTTCGCAGATTTACCATTAGTCG
Ogt_G300_S2	X	[mm10]chrX:101676848-101676908	153	GTCGAATATACGTCTGTCGATTCAGTTTGTATTTTACCTTCTAACGTTGTCTTATTTTCCCCCAGTGTTGACGGATCAAAACGAGATTAGTTCTTTAGCG
Ogt_G300_S2	X	[mm10]chrX:101676911-101676971	154	GTCGAATATACGTCTGTCGAGGGGTTGATAAACAGTAGATAAGCTTTGTATCAGTGAGCTTTGTCCCCAGTTTTTTTTTTACGAGATTAGTTCTTTAGCG
Ogt_G300_S2	X	[mm10]chrX:101677653-101677713	155	GTCGAATATACGTCTGTCGAAGATCCCTTAAAAACAAAAATATGGGAGACGTTTACACAGCCCCACCCCTCCCTGAGGAACGCAGATTTACCATTAGTCG
Ogt_G300_S2	X	[mm10]chrX:101677716-101677776	156	GTCGAATATACGTCTGTCGATTGGGAATAATTGTTACTGGGAAATGGAGAGTCATTTTCTGTAGTGGTAATTTGCCCATGCGCAGATTTACCATTAGTCG
Ogt_G300_S2	X	[mm10]chrX:101678080-101678140	157	GTCGAATATACGTCTGTCGAACAAAAACAACAACTATATACATGAAGGTAGGGGGAGTCAGCAAAAATTGGAGGGGTAAAACGAGATTAGTTCTTTAGCG
Ogt_G300_S2	X	[mm10]chrX:101678147-101678207	158	GTCGAATATACGTCTGTCGAGGGTGAAAATGATACACACACACACACACACACACACACACACACACACACACAGAATTTACGAGATTAGTTCTTTAGCG
Ogt_G300_S2	X	[mm10]chrX:101678505-101678565	159	GTCGAATATACGTCTGTCGATGGTGCGTGCCACAGTGCCAGAACATGTGGTTTTAGGGACTTTGTGAGCTCTTGGCAAGCCGCAGATTTACCATTAGTCG
Ogt_G300_S2	X	[mm10]chrX:101678568-101678628	160	GTCGAATATACGTCTGTCGAGCCAATAGGTAGGACTACATCACAAGACCCCAAGTGTACTTTCCAATGGAAAGAGTAAAGCGCAGATTTACCATTAGTCG
Ogt_G300_S2	X	[mm10]chrX:101678882-101678942	161	GTCGAATATACGTCTGTCGACCTGGATACTCCTTTGTGTAATGGACACACCACAGGGATGGATGTTCTCTGGGCAGGAACACGAGATTAGTTCTTTAGCG
Ogt_G300_S2	X	[mm10]chrX:101678945-101679005	162	GTCGAATATACGTCTGTCGACATGGTGACTATGCCAGGTTAGTGGCTGATAAAATCATCACACTCTTTTTTTTATGCATTACGAGATTAGTTCTTTAGCG
Ogt_G300_S2	X	[mm10]chrX:101679285-101679345	163	GTCGAATATACGTCTGTCGACATTGCTAAAAGCAGACAGGAATATGAAGACATAGCTGTGAAACTGGGAACCGATCTAGACGCAGATTTACCATTAGTCG
Ogt_G300_S2	X	[mm10]chrX:101679348-101679408	164	GTCGAATATACGTCTGTCGAGTAAGTAAACTGCCAGGAACAAACTATATATCTGAGTCTGTAGCTAAAGTGAAGCCATAACGCAGATTTACCATTAGTCG
Ogt_G300_S2	X	[mm10]chrX:101679694-101679754	165	GTCGAATATACGTCTGTCGATTCAGGCCAGCATGGTCTGTAGAGCACGTTCAGGATATTTAAGGGCTTTATTACACAGAGACGAGATTAGTTCTTTAGCG
Ogt_G300_S2	X	[mm10]chrX:101679757-101679817	166	GTCGAATATACGTCTGTCGACCCTCTCTGGGAAAACCAAACCAAACCTTTTTGTATATTTTTATCCTACAGTATATCCAGACGAGATTAGTTCTTTAGCG
Ogt_G300_S2	X	[mm10]chrX:101680195-101680255	167	GTCGAATATACGTCTGTCGACTTTCTTTCTTTCTTTCTTTCTTTCTTTCTTTCTCTCTCTCTCTCTCTCTCTTCCTTTCCCGCAGATTTACCATTAGTCG
Ogt_G300_S2	X	[mm10]chrX:101680258-101680318	168	GTCGAATATACGTCTGTCGACCTTTCCTTTCCTTTCCTTTCCTTTCCTTTCCTTTCCTTTCCTTTCCTTTCCTTTCCTTTCGCAGATTTACCATTAGTCG
Ogt_G300_S2	X	[mm10]chrX:101681056-101681116	169	GTCGAATATACGTCTGTCGATAATTTAATACTACTTTTTAAGGTATGGCGAACATTTGACCACAGAGTGAGCCTTAGTGGACGAGATTAGTTCTTTAGCG
Ogt_G300_S2	X	[mm10]chrX:101681119-101681179	170	GTCGAATATACGTCTGTCGAGTATGTATAGGCATACATAAGCACAGGTCACGACACCAAAACAATCAAGTCAGGACAGCTACGAGATTAGTTCTTTAGCG
Ogt_G300_S2	X	[mm10]chrX:101681524-101681584	171	GTCGAATATACGTCTGTCGAATTAAGTGTTCAATGAATTTTAAGAATTTCTAGACTGGGCATGGTGACCCATAATCTGGGCGCAGATTTACCATTAGTCG
Ogt_G300_S2	X	[mm10]chrX:101681587-101681647	172	GTCGAATATACGTCTGTCGAGGGCTCTATGTGCACATACAAACACATGCATACACGCCCAAGTACACAAATAGAGCTCATCGCAGATTTACCATTAGTCG
Ogt_G300_S2	X	[mm10]chrX:101681990-101682050	173	GTCGAATATACGTCTGTCGAGAGGCTCCCTCTTCCCAGATGACTTTAGTTTGTGTTAAGTTGACAGGCTAATTGGAAAAAACGAGATTAGTTCTTTAGCG
Ogt_G300_S2	X	[mm10]chrX:101682053-101682113	174	GTCGAATATACGTCTGTCGATAACTTTGGTCATATTTTGCCACAGAAGTGACTAAGTGTTTATTCGGTCTGGTGCTGAGTACGAGATTAGTTCTTTAGCG
Ogt_G300_S2	X	[mm10]chrX:101682429-101682489	175	GTCGAATATACGTCTGTCGAGTGTTGCAGACGGATGATATATAATGATAATAGAATAGCACATTCAGACTTACTTCCTGCCGCAGATTTACCATTAGTCG
Ogt_G300_S2	X	[mm10]chrX:101682492-101682552	176	GTCGAATATACGTCTGTCGAATAGGGAGAGACAAGAAAGAAGAAATGCTATTCCACAAGGAATCTCTTAGAGTTTTGCAGCGCAGATTTACCATTAGTCG
Ogt_G300_S2	X	[mm10]chrX:101682857-101682917	177	GTCGAATATACGTCTGTCGATAGGTTTTATAAACCACATGAGCCTATATCAGTCATTTTAGTGTCTGACCTAATGCTTGGACGAGATTAGTTCTTTAGCG
Ogt_G300_S2	X	[mm10]chrX:101682920-101682980	178	GTCGAATATACGTCTGTCGATGTCAGTGCTTTGTTTAGATGATGACTTAAGACTTTTCAGCCTGTTTTACACACCCCAGCACGAGATTAGTTCTTTAGCG
Ogt_G300_S2	X	[mm10]chrX:101683278-101683338	179	GTCGAATATACGTCTGTCGAGTCCTGTTCTTCCCATTTCTTTCAGCAGAAATGAAATCCCAGGTAAGTATATAAGTATTCCGCAGATTTACCATTAGTCG
Ogt_G300_S2	X	[mm10]chrX:101683341-101683401	180	GTCGAATATACGTCTGTCGATGTTTGGTTAGTAAATTACAGTTCTCTCCAGTACCTTAAATGGTGTTCACCGCTCTGAAGCGCAGATTTACCATTAGTCG
Ogt_G300_S2	X	[mm10]chrX:101683657-101683717	181	GTCGAATATACGTCTGTCGAACAGATAAGTCTTGTCTGTTAGTAGTGCTGTAGATTAAGTCTTTCCAAAGCACCTAGGCAACGAGATTAGTTCTTTAGCG
Ogt_G300_S2	X	[mm10]chrX:101683720-101683780	182	GTCGAATATACGTCTGTCGACACCTATTCTGTAGTTGCAGCTATTGCCTGAATGTACCTTAGCTGACAAATTATTGATAAACGAGATTAGTTCTTTAGCG
Ogt_G300_S2	X	[mm10]chrX:101684078-101684138	183	GTCGAATATACGTCTGTCGACATTCCTCCTATAGGGATGAACTTTTTTTCCGACACAAAAAGTAGCCACTGCGGTTAAAGCGCAGATTTACCATTAGTCG
Ogt_G300_S2	X	[mm10]chrX:101684141-101684201	184	GTCGAATATACGTCTGTCGATGCTTATTGTAACAGGCTTTTATTTCCAGGTAACCTATCTGTGGAAGACCTAATTCTGAACGCAGATTTACCATTAGTCG
Ogt_G300_S2	X	[mm10]chrX:101684496-101684556	185	GTCGAATATACGTCTGTCGACCACTAAGGAGAAACAGAGTCCCATTCTGAGGATTATGCATATCCAGCAAGTATATTAATACGAGATTAGTTCTTTAGCG
Ogt_G300_S2	X	[mm10]chrX:101684559-101684619	186	GTCGAATATACGTCTGTCGAGAGCTGGAACTCCAGCCTATGTAGTACATTCTTTATATGGACTTGGTTTTTTTTTAGGTAACGAGATTAGTTCTTTAGCG
Ogt_G300_S2	X	[mm10]chrX:101684938-101684998	187	GTCGAATATACGTCTGTCGATAAAAAAAAGTGTGGGATGTATGTGTGAAAAGGGAGTGGGGTGGTAAATGCCTTTAAGCCCGCAGATTTACCATTAGTCG
Ogt_G300_S2	X	[mm10]chrX:101685005-101685065	188	GTCGAATATACGTCTGTCGACAGGAGTAAGAAGCAGGTGGTGCCCAACCTGGTCTACAGAGCTAGTTGTAGAACTTGTGACGCAGATTTACCATTAGTCG
Ogt_G300_S2	X	[mm10]chrX:101690531-101690591	189	GTCGAATATACGTCTGTCGAAGAAATAAATATTTGGGGGTTGGCGTTTTTATACACATACACAGTACCAAAAGGTCTGTCACGAGATTAGTTCTTTAGCG
Ogt_G300_S2	X	[mm10]chrX:101690598-101690658	190	GTCGAATATACGTCTGTCGAAGACTGAAGGTACCAAGGGAACTGGGCTTTTTTTCAGGCGCAGGGTTGTTCTAATCAAAAACGAGATTAGTTCTTTAGCG
Ogt_G300_S2	X	[mm10]chrX:101690955-101691015	191	GTCGAATATACGTCTGTCGAAGTTGGCTGTCCTCAGTAACCCTACACCCTTTTGCATGAATAGTGTGGTTTCAGTGACTTCGCAGATTTACCATTAGTCG
Ogt_G300_S2	X	[mm10]chrX:101691018-101691078	192	GTCGAATATACGTCTGTCGACTGTGAAATAATGGAATGTGAGAGCAATCTTTCCTCGCTGACTTAAAAGTCAGATTAACTCGCAGATTTACCATTAGTCG
Ogt_G300_S2	X	[mm10]chrX:101691879-101691939	193	GTCGAATATACGTCTGTCGACTGGGTAGTTAGCGGAGGCTCAGCGGCGGCTAACAGGGTGACAGTCTATCAGCTGTTTTCACGAGATTAGTTCTTTAGCG
Ogt_G300_S2	X	[mm10]chrX:101691942-101692002	194	GTCGAATATACGTCTGTCGAACCTACTTTATTGTACCTCCAAAGCCCTAACATGGATTCGTTTGTTAGAATCTGGGTACTACGAGATTAGTTCTTTAGCG
Ogt_G300_S2	X	[mm10]chrX:101692312-101692372	195	GTCGAATATACGTCTGTCGACCTCTGAACTGCCTGTCATTTAACTTTTTGTGTGTAGATTTTAAACAGGATTTCGTGTAGCGCAGATTTACCATTAGTCG
Ogt_G300_S2	X	[mm10]chrX:101692375-101692435	196	GTCGAATATACGTCTGTCGAAAGCTGGCCTTGAACTTCAGATCCTCCTATGATGTTAAAGAGATCACAAGTCTTGTCACTCGCAGATTTACCATTAGTCG
Ogt_G300_S2	X	[mm10]chrX:101692811-101692871	197	GTCGAATATACGTCTGTCGATTACATCATGAACCCTAGTCATATTCACTTCCCAGTCTTCCCAGTTTTACTTGCTCACTTACGAGATTAGTTCTTTAGCG
Ogt_G300_S2	X	[mm10]chrX:101692874-101692934	198	GTCGAATATACGTCTGTCGATGACCTTCCCCCTGACAAAGAAGAAAGCAAGTCCAGTTTGTGTTTCCCATATAGTCACTGACGAGATTAGTTCTTTAGCG
Ogt_G300_S2	X	[mm10]chrX:101693286-101693346	199	GTCGAATATACGTCTGTCGATTCTCTGTACTAGCAGTCAATAGGGTCAGTTCTCAGATCAAAGGCAAAGTGATTAAACAACGCAGATTTACCATTAGTCG
Ogt_G300_S2	X	[mm10]chrX:101693349-101693409	200	GTCGAATATACGTCTGTCGAAAAGAACAAAGAGGTCACACCAGGTAGCAATCAAACAAAGCAAGTCACTCTGGGGGCTTACGCAGATTTACCATTAGTCG
Ogt_G300_S2	X	[mm10]chrX:101693662-101693722	201	GTCGAATATACGTCTGTCGACCATTTATTAGTTCAGGAAGCTATTCATTCGTTGGCAATTCAGTAAGGAATAGTACAGCTACGAGATTAGTTCTTTAGCG
Ogt_G300_S2	X	[mm10]chrX:101693725-101693785	202	GTCGAATATACGTCTGTCGAAACTAGCGCTGTTAAAAATCAAGTTCTAGCTATGCCACTTTCTAGTTGTTCGACCTTTTAACGAGATTAGTTCTTTAGCG
Ogt_G300_S2	X	[mm10]chrX:101694083-101694143	203	GTCGAATATACGTCTGTCGAATTACTCTCCATCTTTTTAGGTCACTGTTTTGATTTTCCCTCCTGCCCCACCCCCCATCTCGCAGATTTACCATTAGTCG
Ogt_G300_S2	X	[mm10]chrX:101694146-101694206	204	GTCGAATATACGTCTGTCGAAGCACTGAGATTAAAGAGGTCCCTGGACTTGGGGTCTGAATTTCTATGTTCATGCTTGTTCGCAGATTTACCATTAGTCG
Ogt_G300_S2	X	[mm10]chrX:101694986-101695046	205	GTCGAATATACGTCTGTCGAAAAGCACTAGCTTTTTCTTGTGTTTGGAACGGACACTGGGAAGTTTAAAGTAACCAACTTACGAGATTAGTTCTTTAGCG
Ogt_G300_S2	X	[mm10]chrX:101695049-101695109	206	GTCGAATATACGTCTGTCGATTTTTCTCCAGGGTCTGACAGTTCTTGAGGCCAGCACCATAGTTCTTTGTCGCTAGATGTACGAGATTAGTTCTTTAGCG
Ogt_G300_S2	X	[mm10]chrX:101695411-101695471	207	GTCGAATATACGTCTGTCGAAAAAAGACAATTTGGTATTTTTTCAGTCAATCAGAAAGTTGCTAGAAGCCGGGGATAGTGCGCAGATTTACCATTAGTCG
Ogt_G300_S2	X	[mm10]chrX:101695474-101695534	208	GTCGAATATACGTCTGTCGACACATTTGTAATCCCATGGCTCTAAAGGCAAAGGAGGATTATGAATTCCCGGCCGGCCTGCGCAGATTTACCATTAGTCG
Ogt_G300_S2	X	[mm10]chrX:101695832-101695892	209	GTCGAATATACGTCTGTCGATTTTAGACCGCTCGGGGAGCCGTTGGCGGTTGAGACCTTCTGCCAGGCCAGATCAGACCGACGAGATTAGTTCTTTAGCG
Ogt_G300_S2	X	[mm10]chrX:101695895-101695955	210	GTCGAATATACGTCTGTCGACAGACGCGGACCCGGACACGGGAGAACAGGTACGCAAATGGGCCTTCGGTTCTGTGTGGGACGAGATTAGTTCTTTAGCG
Ogt_G300_S2	X	[mm10]chrX:101696253-101696313	211	GTCGAATATACGTCTGTCGAGCAGACTGGTAGACGCCCGAGTTGGGGTGGTTTTTGAGACTTGAGACGACGGTCGTGAGGCGCAGATTTACCATTAGTCG
Ogt_G300_S2	X	[mm10]chrX:101696316-101696376	212	GTCGAATATACGTCTGTCGAGGGGGCGGACAGGGCTGATGGCGGACTGGTAGACGCCGGAGTGAGGTGGTTTTGAGACTTCGCAGATTTACCATTAGTCG
Ogt_G300_S2	X	[mm10]chrX:101696765-101696825	213	GTCGAATATACGTCTGTCGAAGTGAGGTGGTTTTGAGACTTGAGACGACGGTCGTGAGGATGTGGGGGCGGACAGGGCCGACGAGATTAGTTCTTTAGCG
Ogt_G300_S2	X	[mm10]chrX:101696828-101696888	214	GTCGAATATACGTCTGTCGAGCGGCACTCGAGTGGGGTGGTTTTGAGAAGGGCATGAGGAAGTGGGGGTGCGGCGGCAGGACGAGATTAGTTCTTTAGCG
Ogt_G300_S2	X	[mm10]chrX:101697101-101697161	215	GTCGAATATACGTCTGTCGAGCAGGGTGGTGATGGGCGCCGGAAAAAGCCGAGGGGTGGCGGGACACGAGCGGCGGAGAACGCAGATTTACCATTAGTCG
Ogt_G300_S2	X	[mm10]chrX:101697165-101697225	216	GTCGAATATACGTCTGTCGAGAGGGGTGGCGGGACACGGGCGCGGGAAAAAGCCGAGGGGGGGGGGAAGCGCGGGAAAAACGCAGATTTACCATTAGTCG
Ogt_G300_S2	X	[mm10]chrX:101697523-101697583	217	GTCGAATATACGTCTGTCGAAAAGCCGAGGGGGGGGGCGTGGGCGACGGAGAAAGCCGAGGGGTGTCGGGACACAGGCGCACGAGATTAGTTCTTTAGCG
Ogt_G300_S2	X	[mm10]chrX:101697587-101697647	218	GTCGAATATACGTCTGTCGAAAAAGCCGAGGGGTTCCGCGGGACACGAGCGACGGAAAAAGTCGAGGGGTGGCGGGACAGACGAGATTAGTTCTTTAGCG
Ogt_G300_S2	X	[mm10]chrX:101697952-101698012	219	GTCGAATATACGTCTGTCGAGACGGAAAAAGCCGAGGCGGGTGGGACACGCGACGGAAAAGGCCGAGTCTGGGACAGGGACGCAGATTTACCATTAGTCG
Ogt_G300_S2	X	[mm10]chrX:101698015-101698075	220	GTCGAATATACGTCTGTCGACGGTGGCTTGGAACCTAGTCTTGTGCCTAGTCTTAGCATGCCTTGGAAGAATGGTGCATCCGCAGATTTACCATTAGTCG
Ogt_G300_S2	X	[mm10]chrX:101698373-101698433	221	GTCGAATATACGTCTGTCGAATGTTGGAGAAGCCCGAGGTCTGCGCAGCCAATGGGAAGCCGTGGAGACAGAGCGGGCCAACGAGATTAGTTCTTTAGCG
Ogt_G300_S2	X	[mm10]chrX:101698436-101698496	222	GTCGAATATACGTCTGTCGACGCAGTAAGAGGGGCTGTCGCGAGGCCTCCTGTGGCTCCCTCTTGCGGCGGGTCCCGGAGACGAGATTAGTTCTTTAGCG
Ogt_G300_S2	X	[mm10]chrX:101698847-101698907	223	GTCGAATATACGTCTGTCGAGTTTAGCCCTGGCTGTCCAGGAACTCACTTTGTAGACCAGGCTACTCAGAAATCCTCCTGCGCAGATTTACCATTAGTCG
Ogt_G300_S2	X	[mm10]chrX:101698914-101698974	224	GTCGAATATACGTCTGTCGACTCCCAAGTGCTGGGATTTAACTAAAGGCGTGCGCCACCACCACCTGGCTTTTTTTTTTTCGCAGATTTACCATTAGTCG
Ogt_G300_S2	X	[mm10]chrX:101699272-101699332	225	GTCGAATATACGTCTGTCGAGCAGGCACAGTACTGTAATCCCAGTCCTTAAGAGGGGAAAGAGGGAGGAGGATAAAAACTACGAGATTAGTTCTTTAGCG
Ogt_G300_S2	X	[mm10]chrX:101699335-101699395	226	GTCGAATATACGTCTGTCGAAGGTCATCTTCCATTATATGAGGGTTTAAAGCCAGCCAGGATCTAATCTAAGACATTATCACGAGATTAGTTCTTTAGCG
Ogt_G300_S2	X	[mm10]chrX:101699661-101699721	227	GTCGAATATACGTCTGTCGAAGTGGCAGCAGCACCACCAGCAGCAGCAGCAGCAGCAGCAGCAGCAGCAGCAGCAGCAGCCGCAGATTTACCATTAGTCG
Ogt_G300_S2	X	[mm10]chrX:101699724-101699784	228	GTCGAATATACGTCTGTCGAAGCAGCAGTAAAGAATGTGAGTAGACTGATTATGGGATGGATCCCCGGGTGGGGTAGTCTCGCAGATTTACCATTAGTCG
Ogt_G300_S2	X	[mm10]chrX:101700595-101700655	229	GTCGAATATACGTCTGTCGATTCGTTCCCTGCTTTAAAGAGCAGGGGAAGATCTTCATGTTTCCCTTTTGTGTTGTTTACACGAGATTAGTTCTTTAGCG
Ogt_G300_S2	X	[mm10]chrX:101700662-101700722	230	GTCGAATATACGTCTGTCGATGGTTCCTGGATCTTCTTTTATTTCCTCTCTGTCTTTCATGTCTTTCATTCTTTTGTCTCACGAGATTAGTTCTTTAGCG
Ogt_G300_S2	X	[mm10]chrX:101701048-101701108	231	GTCGAATATACGTCTGTCGACCTGGAACTCTCTGTAGACTAGGCTGGCCTCTAATAGAGATCTGGCTGCTCCTGTTTCCTCGCAGATTTACCATTAGTCG
Ogt_G300_S2	X	[mm10]chrX:101701115-101701175	232	GTCGAATATACGTCTGTCGAGGGATTAAAGGTCTGTATCACCGTGCTTGGCTAGTTTTTGGCTTTTTGAGTCTGGGTCTCCGCAGATTTACCATTAGTCG
Ogt_G300_S2	X	[mm10]chrX:101701456-101701516	233	GTCGAATATACGTCTGTCGAAGCATTTAGAACTTTATAGCCCAGTAGGTTGTGGAAAAAGCAAGTGAGGAATGGATAAAAACGAGATTAGTTCTTTAGCG
Ogt_G300_S2	X	[mm10]chrX:101701519-101701579	234	GTCGAATATACGTCTGTCGAGGATCAGACCCAAAAGATGATCATGTGCTTGAAATTAAGAGAGGCCTCTTTTTTTTTTTGACGAGATTAGTTCTTTAGCG
Ogt_G300_S2	X	[mm10]chrX:101701789-101701849	235	GTCGAATATACGTCTGTCGAGCTAGGAGAAATATTGGACACCCTGAAACCAGAGTTATAAACCAATTATAAGCTACCATGCGCAGATTTACCATTAGTCG
Ogt_G300_S2	X	[mm10]chrX:101701852-101701912	236	GTCGAATATACGTCTGTCGAGTTCTAAGAACCAAACTAGGGTCCTCTGCAAGAGGAGCAAGTGTGGGCTGGAGAGATGGCCGCAGATTTACCATTAGTCG
Ogt_G300_S2	X	[mm10]chrX:101703075-101703135	237	GTCGAATATACGTCTGTCGAATGAAAATGATAATCCTCCTGATGAGTTTTTCACTTCCACCACAACTATTTGAGTACTGGACGAGATTAGTTCTTTAGCG
Ogt_G300_S2	X	[mm10]chrX:101703138-101703198	238	GTCGAATATACGTCTGTCGATCTGACAAGGCCCAGTTTATTCTCAGTACCTGACAGATGCCTCCTTTTGGAAGTTTGCAAACGAGATTAGTTCTTTAGCG
Ogt_G300_S2	X	[mm10]chrX:101703500-101703560	239	GTCGAATATACGTCTGTCGATAGAGAAACAACTGAGCTCTGAAGCCTTATTACATGTGGTAGTTTTAGAATCAGATTCTGCGCAGATTTACCATTAGTCG
Ogt_G300_S2	X	[mm10]chrX:101703564-101703624	240	GTCGAATATACGTCTGTCGACTTTAAGTTTCTTATGCTTTCATATCCAGTGCCACCATTTCTTTCTCCATCAAGTATTGGCGCAGATTTACCATTAGTCG
Ogt_G300_S2	X	[mm10]chrX:101703950-101704010	241	GTCGAATATACGTCTGTCGAGAGATACATGAAATGCCACTTTATTGAAGTAATTCCCCTTATTTTGCTATGGACCACAAGACGAGATTAGTTCTTTAGCG
Ogt_G300_S2	X	[mm10]chrX:101704013-101704073	242	GTCGAATATACGTCTGTCGAGCAGATTTGTCTTTAGGAACAACTGAGCTCATGCTGTTTAGACAGGTGATTTCAAAGTGGACGAGATTAGTTCTTTAGCG
Ogt_G300_S2	X	[mm10]chrX:101704371-101704431	243	GTCGAATATACGTCTGTCGAACTAAGCAGAAAAGTGATGAGCCCCAAATGTCGGTGCTTGAAAAAGAGGGGGTTGAATGTCGCAGATTTACCATTAGTCG
Ogt_G300_S2	X	[mm10]chrX:101704434-101704494	244	GTCGAATATACGTCTGTCGAGGTTCTGACTCGACTTCACCTCATGATGTTTGTGAAATATGGGATGTTTGTGGGAGTTCCCGCAGATTTACCATTAGTCG
Ogt_G300_S2	X	[mm10]chrX:101704797-101704857	245	GTCGAATATACGTCTGTCGAGAGACTGAGGCCAAGGGGGAGCCCGAATCTGAAGCCAAGGGGGAGATGGAGACTGAGGCCACGAGATTAGTTCTTTAGCG
Ogt_G300_S2	X	[mm10]chrX:101704864-101704924	246	GTCGAATATACGTCTGTCGAAGTCCGAATCTGAAGCCAAGGGGGAGATGGAGACTGAGGCCAAGGGGGAGTCCGAATCTGACGAGATTAGTTCTTTAGCG
Ogt_G300_S2	X	[mm10]chrX:101705171-101705231	247	GTCGAATATACGTCTGTCGAGGCACAACAAAGGAAAAGAAAGAGAAAGAACAGATTCATATGTATGTCATCAAGTAAGCCCGCAGATTTACCATTAGTCG
Ogt_G300_S2	X	[mm10]chrX:101705234-101705294	248	GTCGAATATACGTCTGTCGATAGGAAACGCCGTAGGGCTGACCCACAGGATGGGGCTGACCCACAGGATGGGGCTGACCCCGCAGATTTACCATTAGTCG
Ogt_G300_S2	X	[mm10]chrX:101705535-101705595	249	GTCGAATATACGTCTGTCGATTTTGCAAATTGCCACTGGTTAGGGAGCGCCACTGTCCATTTTCCTTATGTTCCAGTATAACGAGATTAGTTCTTTAGCG
Ogt_G300_S2	X	[mm10]chrX:101705598-101705658	250	GTCGAATATACGTCTGTCGAGCATTCCCCAATGTTCAATCCCCCTGCAGTGTTTGTTTCTTTTTCTTTTTCTTTTTCTTTACGAGATTAGTTCTTTAGCG
Ogt_G300_S2	X	[mm10]chrX:101705895-101705955	251	GTCGAATATACGTCTGTCGAGGCTTATAAAGCAGGCTGGCCTCAAATTCATATTCACCTACCTTTTCTTCCCAAGAGCTGCGCAGATTTACCATTAGTCG
Ogt_G300_S2	X	[mm10]chrX:101705962-101706022	252	GTCGAATATACGTCTGTCGAAGCCGTGTGCCACCACGCCCGGCTTTTTTTTTTTTTTTTTTTCTTTTGAGACAGGGTTTCCGCAGATTTACCATTAGTCG
Ogt_G300_S2	X	[mm10]chrX:101706299-101706359	253	GTCGAATATACGTCTGTCGACTTTACTAGCCTCGTGGATAGTTAGTTGATCCATGAGGGCAAAGGGCCTGGGGGTGGGGTACGAGATTAGTTCTTTAGCG
Ogt_G300_S2	X	[mm10]chrX:101706362-101706422	254	GTCGAATATACGTCTGTCGAGAAGCCCTGTGAGTACACCAGGGCCAGTTGTGGGGAGTCAGATCAACTTTACTTTTGGTGACGAGATTAGTTCTTTAGCG
Ogt_G300_S2	X	[mm10]chrX:101706720-101706780	255	GTCGAATATACGTCTGTCGATGGAGGCTTATCTAGTCAAGGTGGACTTTGACCTTAGAGTTTCCCACCCTATACCAATCTCGCAGATTTACCATTAGTCG
Ogt_G300_S2	X	[mm10]chrX:101706783-101706843	256	GTCGAATATACGTCTGTCGAGACTGCACTTGTCTTAGATGCTCAGGCAACCTAGCCTCCAAGAACCCTTATGAAAATTCTCGCAGATTTACCATTAGTCG
Ogt_G300_S2	X	[mm10]chrX:101707141-101707201	257	GTCGAATATACGTCTGTCGAACATTTTCTTTTGCATGTTCATCTGTCTGGTGGATACTGGAGACTCCCAAGGGGATGAAGACGAGATTAGTTCTTTAGCG
Ogt_G300_S2	X	[mm10]chrX:101707204-101707264	258	GTCGAATATACGTCTGTCGATCTGGCTGAATGAAGCTTTCTGACCCAAAGTGGGGATGCACATGCAGAGTAATGAGGTCAACGAGATTAGTTCTTTAGCG
Ogt_G300_S2	X	[mm10]chrX:101707562-101707622	259	GTCGAATATACGTCTGTCGACAAGTTCAAGGCCCAACTGAACTATGTGATACTCTTACCTCAAAAACCAACAAACAAGGCCGCAGATTTACCATTAGTCG
Ogt_G300_S2	X	[mm10]chrX:101707625-101707685	260	GTCGAATATACGTCTGTCGATACAGAGGGGAAGGTAGAGCTTACATGTTTGATCTTGGATGGGAGGGAGGGTAGTTAAAACGCAGATTTACCATTAGTCG
Ogt_G300_S2	X	[mm10]chrX:101707911-101707971	261	GTCGAATATACGTCTGTCGATTCATTAAGCTATAGGGAGCTATCGGAAACAAGTGATTGCATAGGCCAAAAGCATGTTATACGAGATTAGTTCTTTAGCG
Ogt_G300_S2	X	[mm10]chrX:101707974-101708034	262	GTCGAATATACGTCTGTCGACCAGCTAGAGGTCAATTCATTTTCCCATTTAGGTTCTAAAATCTCATTTTCCCCTGAAAAACGAGATTAGTTCTTTAGCG
Ogt_G300_S2	X	[mm10]chrX:101708691-101708751	263	GTCGAATATACGTCTGTCGAATTGGAAACCCAGCAGCTGCCTTCTGCAGGGATGGGCTCGGGAAGGAGGTAGGGACAGGGCGCAGATTTACCATTAGTCG
Ogt_G300_S2	X	[mm10]chrX:101708754-101708814	264	GTCGAATATACGTCTGTCGATTCACATCACTAAACTAACCTAACTTGGGAAACCGTAAGGGACCGTCTTCAACTGGCCTTCGCAGATTTACCATTAGTCG
Ogt_G300_S2	X	[mm10]chrX:101709115-101709175	265	GTCGAATATACGTCTGTCGAGGCCTGGGGCTCTTGGCTCTCAGGGGCAGCGGCCTTCCCTTCTTGGGCAGTGCCCTCATCACGAGATTAGTTCTTTAGCG
Ogt_G300_S2	X	[mm10]chrX:101709182-101709242	266	GTCGAATATACGTCTGTCGAGCGCTGAGATCCCCCTGCTCCTGCTCTTCCTCTGTTGGCGAGGAGGCTGAAGAATCATCCACGAGATTAGTTCTTTAGCG
Ogt_G300_S2	X	[mm10]chrX:101709588-101709648	267	GTCGAATATACGTCTGTCGACCAGCGAGCAGAGGGGTGGGGCTGTGTCCGAGAGGGAGAGGCACGGGGGACGGGGAGGGGCGCAGATTTACCATTAGTCG
Ogt_G300_S2	X	[mm10]chrX:101709651-101709711	268	GTCGAATATACGTCTGTCGAGGGCAAGCGCGCTGCAACCCCCCCAACCCCCCCCCCCCCCACAGCCGACCCACTGCTGCTCGCAGATTTACCATTAGTCG
Ogt_G300_S2	X	[mm10]chrX:101709985-101710045	269	GTCGAATATACGTCTGTCGAGTGTGTGTGTGTGTGTTTTGTTTTTGTTTTGAGGTGCTAGGGATGGGACCGGGGCCTCACACGAGATTAGTTCTTTAGCG
Ogt_G300_S2	X	[mm10]chrX:101710048-101710108	270	GTCGAATATACGTCTGTCGAGACCCGTACAAATATTCAACCACTGAGCTATTTTGGCCTGGTAATATTTTCAAGATTGTAACGAGATTAGTTCTTTAGCG
Ogt_G300_S2	X	[mm10]chrX:101716410-101716470	271	GTCGAATATACGTCTGTCGAGAACGGCTCGGTGTCCCTGTGCTTTTTGCCCACTAAGAAGAAAGAAGCAGCTCATCATGTCGCAGATTTACCATTAGTCG
Ogt_G300_S2	X	[mm10]chrX:101716473-101716533	272	GTCGAATATACGTCTGTCGACCCCGACCCCTGTGAGCAAGGACTCTTCTCTGGATTCTGTATACACATTCAAGCTGTTTTCGCAGATTTACCATTAGTCG
Ogt_G300_S2	X	[mm10]chrX:101716831-101716891	273	GTCGAATATACGTCTGTCGATTTTCTGATTATACACTGAGGTCCCACTCTCTGCTGAAGTTGGCAGATAGTATAGGTTTTACGAGATTAGTTCTTTAGCG
Ogt_G300_S2	X	[mm10]chrX:101716894-101716954	274	GTCGAATATACGTCTGTCGACTGCTGCTTTTGCTGATACATACTGCTTTCAATACTAGGAAACTAAAAGCAGAAGTGTTTACGAGATTAGTTCTTTAGCG
Ogt_G300_S2	X	[mm10]chrX:101717252-101717312	275	GTCGAATATACGTCTGTCGAGTGTGGCCAGCAGGAAAACTATGAATTAATTTAACTCCTAACTCCTTGGGGCTGGTGAGACGCAGATTTACCATTAGTCG
Ogt_G300_S2	X	[mm10]chrX:101717315-101717375	276	GTCGAATATACGTCTGTCGAAGAAGGAAAGAGGGGCGGGGGGGGGGGGGGGAGTGTGCACGCACGGACACACACACACACCGCAGATTTACCATTAGTCG
Ogt_G300_S2	X	[mm10]chrX:101717594-101717654	277	GTCGAATATACGTCTGTCGAAACAATGTTCTAACCCCATTCACACAAACTTTACACACATAGTCCATGGGTGGGAGAGACACGAGATTAGTTCTTTAGCG
Ogt_G300_S2	X	[mm10]chrX:101717657-101717717	278	GTCGAATATACGTCTGTCGAATTCCAGCCGCATCATACCATTTTCATTCCTTCTTCCATCGCTTTTATATCCCAGCAAAAACGAGATTAGTTCTTTAGCG
Ogt_G300_S2	X	[mm10]chrX:101719274-101719334	279	GTCGAATATACGTCTGTCGACCACTGTTCTAGCGCTGCTGTCCCAGCAGCCTCTGTTGCTCCAAGACACTGCACTGGATGCGCAGATTTACCATTAGTCG
Ogt_G300_S2	X	[mm10]chrX:101719337-101719397	280	GTCGAATATACGTCTGTCGATGAGCTGAGCCAGTGGGGTGGGGTGGGGGGCTGGCTAGCCAGCAAGGGGAGTGCAGGGGACGCAGATTTACCATTAGTCG
Ogt_G300_S2	X	[mm10]chrX:101719680-101719740	281	GTCGAATATACGTCTGTCGATTAGAGGGGTATAGTGCTGGGAGCAGGTGAAGCTCCTACTGTCCCTTCTGTGTCCCCAGGACGAGATTAGTTCTTTAGCG
Ogt_G300_S2	X	[mm10]chrX:101719745-101719805	282	GTCGAATATACGTCTGTCGAAGTCCTTAGCTCGACCTTACCAGGCTTCCTCTCATAGTCCACTGCCCAGCCGGGCAGTGGACGAGATTAGTTCTTTAGCG
Ogt_G300_S2	X	[mm10]chrX:101720103-101720163	283	GTCGAATATACGTCTGTCGACAATTTAGTAGTTATTAACTGTTCTGGAAAATTCTCCATCTCAGGAACCTGAGAAGTCAGCGCAGATTTACCATTAGTCG
Ogt_G300_S2	X	[mm10]chrX:101720166-101720226	284	GTCGAATATACGTCTGTCGACTCACCATGTTCCCATTTCTTTTTCTAGCTCTGTGGGCTTGTCTCTCTGACTATGAATTGCGCAGATTTACCATTAGTCG
Ogt_G300_S2	X	[mm10]chrX:101720524-101720584	285	GTCGAATATACGTCTGTCGATCTGACCTTTGGGCCAGACACCTCTAAGCCCCAGTGTCTTCATCTGCAAGATAGAGATGGACGAGATTAGTTCTTTAGCG
Ogt_G300_S2	X	[mm10]chrX:101720587-101720647	286	GTCGAATATACGTCTGTCGACAAACAGTACTAACTTCTTGGATGGGTGGCTGTGAGAATTAAATGTGATGCAAAAAGAGGACGAGATTAGTTCTTTAGCG
Ogt_G300_S2	X	[mm10]chrX:101720945-101721005	287	GTCGAATATACGTCTGTCGAAGAGAGGGGAGGATGGGGACTTTGTGTTGCAAAGGAGATACTGGCTGGAAGAGCCCATAGCGCAGATTTACCATTAGTCG
Ogt_G300_S2	X	[mm10]chrX:101721008-101721068	288	GTCGAATATACGTCTGTCGAGGAAGTAGCAACCCACTTCCCAGCTGAACACAAGGTAAGGGAAAAATATACTTCAAATGCCGCAGATTTACCATTAGTCG
Ogt_G300_S2	X	[mm10]chrX:101721401-101721461	289	GTCGAATATACGTCTGTCGAGTGCAAAATACCTGGATGACTCTTGAATAACATTGAAAAGTTAAAACAATACCCTGGGAGACGAGATTAGTTCTTTAGCG
Ogt_G300_S2	X	[mm10]chrX:101721464-101721524	290	GTCGAATATACGTCTGTCGATTTCAAACACAATAAGGAAGAACTGGCTCAGAAAAGTCTGCACACTACTTTGATTGAAAGACGAGATTAGTTCTTTAGCG
Ogt_G300_S2	X	[mm10]chrX:101721834-101721894	291	GTCGAATATACGTCTGTCGACTGTTTAGCACATTGTCACCAACACTGCCATATCTGGGGGGGGGGGATGCATTTTAGACTCGCAGATTTACCATTAGTCG
Ogt_G300_S2	X	[mm10]chrX:101721897-101721957	292	GTCGAATATACGTCTGTCGACAGACATGAGAGATATGCTTACATGAAGGAGAAGTTTTTGTTTTGTGCTATATGGAACGGCGCAGATTTACCATTAGTCG
Ogt_G300_S2	X	[mm10]chrX:101722255-101722315	293	GTCGAATATACGTCTGTCGATCAAATACCTTATATAAAATGTCCTCTACTCATCCTCCGCTACACTTCATCCCACCTGTAACGAGATTAGTTCTTTAGCG
Ogt_G300_S2	X	[mm10]chrX:101722318-101722378	294	GTCGAATATACGTCTGTCGATACTTCCAATGCCCGACAGAGTGGAAACACTATGCAGGAAAGAGTGGCAAGGGAAAATCTACGAGATTAGTTCTTTAGCG
Ogt_G300_S2	X	[mm10]chrX:101722676-101722736	295	GTCGAATATACGTCTGTCGAACAAGTGCACAGGAAAATGTGACAGGGAGCTACTGCTGAATAAAGTCCACCTGCTAGTAGCGCAGATTTACCATTAGTCG
Ogt_G300_S2	X	[mm10]chrX:101722739-101722799	296	GTCGAATATACGTCTGTCGAGGTGGTATGTACTGGATTAGAAATCCAGAGGCAGAGGCCTGCTGGCCAGTCCCCTTGATTCGCAGATTTACCATTAGTCG
Ogt_G300_S2	X	[mm10]chrX:101723097-101723157	297	GTCGAATATACGTCTGTCGACCTGACGGCCCCAGACTTGGATCCATGCATCTAAGCACCAAATCCTACATTTGTGTGGCCACGAGATTAGTTCTTTAGCG
Ogt_G300_S2	X	[mm10]chrX:101723160-101723220	298	GTCGAATATACGTCTGTCGAACAATTTCCTCCCTTGGGTCCTGATTAGTTAACGTAATTAAGTCCTTCCCAGGACTTCAAACGAGATTAGTTCTTTAGCG
Ogt_G300_S2	X	[mm10]chrX:101723555-101723615	299	GTCGAATATACGTCTGTCGATCAGGGGTTCATCCCTGGAGGAAAAAAACCTGTTTTGCCAGGGCAGCTATTGCCTGTAGCCGCAGATTTACCATTAGTCG
Ogt_G300_S2	X	[mm10]chrX:101723622-101723682	300	GTCGAATATACGTCTGTCGACTACGGGTAGAGTCTTTTGAAATTTCTTTCATCCATGTTGGCATGTCCTCTTACTTTTCACGCAGATTTACCATTAGTCG
Ogt_G300_S2	X	[mm10]chrX:101723995-101724055	301	GTCGAATATACGTCTGTCGATCATTTTGAGTTGCCAGAGAAAATGGAAATCACTTGGAATAAAAAGATGTTGCAGACTGCACGAGATTAGTTCTTTAGCG
Ogt_G300_S2	X	[mm10]chrX:101724058-101724118	302	GTCGAATATACGTCTGTCGAACTACCAATGAGATACAACAACCAAAGAGGGAGTGCTATGCCAAAACTGGCATTTCTCTGACGAGATTAGTTCTTTAGCG
Ogt_G300_S2	X	[mm10]chrX:101724416-101724476	303	GTCGAATATACGTCTGTCGAAGAAATGACAGCTCAAAGCAGTGACATAGTCTGCCAGGTAAGTGTAATTTAGCAGGTTTCCGCAGATTTACCATTAGTCG
Ogt_G300_S2	X	[mm10]chrX:101724479-101724539	304	GTCGAATATACGTCTGTCGACATCTACCCCTACCATATTGGGAACCAGAGCCTCACACATGTTCTGTAAGAGGTATGCCACGCAGATTTACCATTAGTCG
Ogt_G300_S2	X	[mm10]chrX:101724784-101724844	305	GTCGAATATACGTCTGTCGAAGGGCTGGTCTCACACTCACTATATAGCTCAGGCTGACCTAGAATTTGTGTAGTCCTCCTACGAGATTAGTTCTTTAGCG
Ogt_G300_S2	X	[mm10]chrX:101724847-101724907	306	GTCGAATATACGTCTGTCGATCAGCCTTCCAGTGCTAGGATTACATAAGTAAGCTGCTGGATTTTTGTTGTTGTTTATTTACGAGATTAGTTCTTTAGCG
Ogt_G300_S2	X	[mm10]chrX:101725205-101725265	307	GTCGAATATACGTCTGTCGAAGCTTGGATGGATTTTCTAATTCTAAAGTCAGTGAGTTGTTAAGCGTCCAGCTCAGACTGCGCAGATTTACCATTAGTCG
Ogt_G300_S2	X	[mm10]chrX:101725268-101725328	308	GTCGAATATACGTCTGTCGAGAGATGGCTCAGTGCTACTAAGCCTGCTGATCTGAGTTTGATCCCTGGGGCCTGAATATTCGCAGATTTACCATTAGTCG
Ogt_G300_S2	X	[mm10]chrX:101725626-101725686	309	GTCGAATATACGTCTGTCGAATGGGTGGAACTTTCTCTCTCAGAATCTTGGGAAGGCAACCCCTATGGCTGCCTGCCTGTACGAGATTAGTTCTTTAGCG
Ogt_G300_S2	X	[mm10]chrX:101725689-101725749	310	GTCGAATATACGTCTGTCGACACTTCTGTGAGATGGCCTTGTGTTTGGTGAAAGTGAAAATCAAGGGGTTTCTGGGCAGCACGAGATTAGTTCTTTAGCG
Ogt_G300_S2	X	[mm10]chrX:101726079-101726139	311	GTCGAATATACGTCTGTCGAGTTGCAGGGACAGAGAGCGACTTAGAGGAGGGAGAAGGGAAGCAAAGATGGAGGCAGATGCGCAGATTTACCATTAGTCG
Ogt_G300_S2	X	[mm10]chrX:101726142-101726202	312	GTCGAATATACGTCTGTCGAAGGAAGAAGATCCCGATCCCGCGTGGTTTTAAATTAGCCACAGACAGTTATGAATATCATCGCAGATTTACCATTAGTCG
Ogt_G300_S2	X	[mm10]chrX:101726524-101726584	313	GTCGAATATACGTCTGTCGATCAGCAGAAGTGCAGGAAGCCTGCTGGCATTTAAAAAAAAATATTTCCTGCAACAAATGTACGAGATTAGTTCTTTAGCG
Ogt_G300_S2	X	[mm10]chrX:101726591-101726651	314	GTCGAATATACGTCTGTCGAGCAAATACAGGAAAGGTCTTTCTCATACTTTTTTCCAATTACTTTGTCATTTCAGGCTCCACGAGATTAGTTCTTTAGCG
Ogt_G300_S2	X	[mm10]chrX:101726949-101727009	315	GTCGAATATACGTCTGTCGATTTCTGTGTCCTCTTTCTCTATTACCCCCACCTAACCACCTCAGGCCTAAATTTAGCAGGCGCAGATTTACCATTAGTCG
Ogt_G300_S2	X	[mm10]chrX:101727012-101727072	316	GTCGAATATACGTCTGTCGAGACCCTGCTGATGCCTGGGGCTCCTCAGAACCCACAGAAAACAGTTTTGGGCACAAGGTTCGCAGATTTACCATTAGTCG
Ogt_G300_S2	X	[mm10]chrX:101727368-101727428	317	GTCGAATATACGTCTGTCGAGTAAATCTTTAAGGAAAATCCTTAAGGTTGTCCCGGAGTATATTTATATGAGCTGACTCCACGAGATTAGTTCTTTAGCG
Ogt_G300_S2	X	[mm10]chrX:101727431-101727491	318	GTCGAATATACGTCTGTCGAACTGGCAAGAAGTTTAAGAAATCCCTATTTCATGGGGCAGGTGAGATGGCTCAGCGGGTAACGAGATTAGTTCTTTAGCG
Ogt_G300_S2	X	[mm10]chrX:101727857-101727917	319	GTCGAATATACGTCTGTCGATCTTGGATGGGGAGTGTTGAGAAAATATTGTCATAAAAGAGTAAGTTGTAAAGGCACTACCGCAGATTTACCATTAGTCG
Ogt_G300_S2	X	[mm10]chrX:101727920-101727980	320	GTCGAATATACGTCTGTCGAACAGCTAGGCTTCTGTCAGCCTATTACACTAGCCACATTTGAAGAGCCAACGTGCTTCATCGCAGATTTACCATTAGTCG
Ogt_G300_S2	X	[mm10]chrX:101728272-101728332	321	GTCGAATATACGTCTGTCGACCTTCCTCTCTGGAGAATGAAGTTCTCTGTCTTTCCCAGCTCCTAGTTCCTCGCACAGCCACGAGATTAGTTCTTTAGCG
Ogt_G300_S2	X	[mm10]chrX:101728335-101728395	322	GTCGAATATACGTCTGTCGAGCCTGCATGGCTTCTTCAAAGACAAAACATCTTTTGTCTCTTTCCTTTCCTTTTATAGATACGAGATTAGTTCTTTAGCG
Ogt_G300_S2	X	[mm10]chrX:101728656-101728716	323	GTCGAATATACGTCTGTCGATTTTTGTTTTTTGAGACAGAGTTTCTCATGTGGCTGTAGGTCGTTCCGACTAGGCTAGGTCGCAGATTTACCATTAGTCG
Ogt_G300_S2	X	[mm10]chrX:101728719-101728779	324	GTCGAATATACGTCTGTCGACTAACCAGCACATTACTGTGCTCTTCCTGTTACCACCTCCCCAGGACTGGGGTTACAAGTCGCAGATTTACCATTAGTCG
Ogt_G300_S2	X	[mm10]chrX:101729077-101729137	325	GTCGAATATACGTCTGTCGACTTTTGGGAGTCAGGCCTCTTCTACTCTGTGGGCCCCAGGTTGTCAGGCTTGGTGACAAAACGAGATTAGTTCTTTAGCG
Ogt_G300_S2	X	[mm10]chrX:101729140-101729200	326	GTCGAATATACGTCTGTCGATCTTATCTGCTGAGGTCACTGGCTTGGTCCTGACCTTGAACTCTTTAGGTAGGCAAGGCAACGAGATTAGTTCTTTAGCG
Ogt_G300_S2	X	[mm10]chrX:101729518-101729578	327	GTCGAATATACGTCTGTCGACCTCTTTGCCATCTTTGTTGGCTTGTTTTGTTGTTGTTCTTTTGTGTGTTTGTTTTTGAGCGCAGATTTACCATTAGTCG
Ogt_G300_S2	X	[mm10]chrX:101729581-101729641	328	GTCGAATATACGTCTGTCGAGGGTTTCACTGGGTATCCATGGCTGGTCTGGAAACTGCTAGATAGATGACATTGGCTTCACGCAGATTTACCATTAGTCG
Ogt_G300_S2	X	[mm10]chrX:101729972-101730032	329	GTCGAATATACGTCTGTCGAATTACCAGGATATTCTCTTTTGACATTTTCCTCTCTTCTTGCTTCTCATGTTGTAGAAGGACGAGATTAGTTCTTTAGCG
Ogt_G300_S2	X	[mm10]chrX:101730035-101730095	330	GTCGAATATACGTCTGTCGAGTCTAGTCTTTGGAATACTGAGACTAGATAAGGTTGCAGGTATGTATCTATAGGGCAGGGACGAGATTAGTTCTTTAGCG
Ogt_G300_S2	X	[mm10]chrX:101730418-101730478	331	GTCGAATATACGTCTGTCGATGTGTGTGTGCATGTATGTGAAAGCCATAGGAGCATATTGAGTGTTCTCTATTACTTTCTCGCAGATTTACCATTAGTCG
Ogt_G300_S2	X	[mm10]chrX:101730481-101730541	332	GTCGAATATACGTCTGTCGATTATTTCTTTGAGACAGGAACCTGGAACTCACCCCCACCCTCAGGCTGGCAGCCAGCCAACGCAGATTTACCATTAGTCG
Ogt_G300_S2	X	[mm10]chrX:101730785-101730845	333	GTCGAATATACGTCTGTCGACCCAAACCCTTAACTCTAGCCAGCTGAGACCATTTTTTTTTGAGAGAGAGAGAGAGAGAGACGAGATTAGTTCTTTAGCG
Ogt_G300_S2	X	[mm10]chrX:101730848-101730908	334	GTCGAATATACGTCTGTCGAGAGAGAGAGAGAGAGAGAGAGAGAGAGAAAGAGAGAGAGAGAGAGAGAGTTTCTCACTGTACGAGATTAGTTCTTTAGCG
Ogt_G300_S2	X	[mm10]chrX:101731206-101731266	335	GTCGAATATACGTCTGTCGATACCCTCTTGCTCTGTAGTATAGATTGCTTGGTATTTGTTCATTTTCACCACACCTTCCCCGCAGATTTACCATTAGTCG
Ogt_G300_S2	X	[mm10]chrX:101731269-101731329	336	GTCGAATATACGTCTGTCGATGGCCTGAGCTGCTGGGATCAGGAAATTATGGCTTATTAATGTCTAGTGGCCCCAGAGCACGCAGATTTACCATTAGTCG
Ogt_G300_S2	X	[mm10]chrX:101731627-101731687	337	GTCGAATATACGTCTGTCGATGACAACGCCTGGCCCTCTGTGCTATTTGCCTCTCCCTCTTCTCACACAGGGATGGCTGAACGAGATTAGTTCTTTAGCG
Ogt_G300_S2	X	[mm10]chrX:101731690-101731750	338	GTCGAATATACGTCTGTCGACTACTTGCTAATTTAGTAGGGCGGTGGGGCTCCAGGCAGCTAGTTCTAAAACAGCAAGATACGAGATTAGTTCTTTAGCG
Ogt_G300_S2	X	[mm10]chrX:101732048-101732108	339	GTCGAATATACGTCTGTCGACCCAGGCGCGTGAACAACATCCACATTTGCTCTCTGAACTTCACTCCCACAAAGGCATAGCGCAGATTTACCATTAGTCG
Ogt_G300_S2	X	[mm10]chrX:101732111-101732171	340	GTCGAATATACGTCTGTCGAAGCGGATTGAGGCAGCAGTGCATGTACCCCATGCCCGAGGTGACTGACTTGGCCACATCCCGCAGATTTACCATTAGTCG
Ogt_G300_S2	X	[mm10]chrX:101732469-101732529	341	GTCGAATATACGTCTGTCGAGCTGATCGTAGTTGGCTGATAGGTAGATGAAATCTGGGAGGGCAAAGAGCAGACAGAGACACGAGATTAGTTCTTTAGCG
Ogt_G300_S2	X	[mm10]chrX:101732532-101732592	342	GTCGAATATACGTCTGTCGAATACAACTATGCAGGTGAGGGCTACACGTACCCGGGGGTCCCTGCGGTAGATCTGGGTGGACGAGATTAGTTCTTTAGCG
Ogt_G300_S2	X	[mm10]chrX:101732890-101732950	343	GTCGAATATACGTCTGTCGACAGGAAGGTTCTGTCAAAGTTCAGGCTGAAATCCTGTGGGCAGGGCGGGGAGTCAGAGAACGCAGATTTACCATTAGTCG
Ogt_G300_S2	X	[mm10]chrX:101732953-101733013	344	GTCGAATATACGTCTGTCGAGCTCTCGTTTTCCCCATAATCGTAGGGAGAGGTGCTGTTTTCCAGAAGAAAGGCAAAGTCCGCAGATTTACCATTAGTCG
Ogt_G300_S2	X	[mm10]chrX:101733311-101733371	345	GTCGAATATACGTCTGTCGAGGGATTCTCTGCCGGAAGAGGAACTTCCTTCCAGGGTCTGGAGCCTTCCATTCTTTCCCTACGAGATTAGTTCTTTAGCG
Ogt_G300_S2	X	[mm10]chrX:101733374-101733434	346	GTCGAATATACGTCTGTCGATCTTTACGCTTGGTGATTTGTCAGCCTTGCTGCTATGGCCACCCCTGCCTGGATCAACCAACGAGATTAGTTCTTTAGCG
Ogt_G300_S2	X	[mm10]chrX:101733732-101733792	347	GTCGAATATACGTCTGTCGACATACCACTTCCACTTCAGCTCTACACCTTATCCCAAACTATCTGAGAACTAGAGATCACCGCAGATTTACCATTAGTCG
Ogt_G300_S2	X	[mm10]chrX:101733795-101733855	348	GTCGAATATACGTCTGTCGAAGTTGAGTTTCTACAGCTTGACATTTTCAGATGAGGCATCCAAGCCACAGAGGCAGGAGACGCAGATTTACCATTAGTCG
Ogt_G300_S2	X	[mm10]chrX:101734153-101734213	349	GTCGAATATACGTCTGTCGAACAGAGGAAGTGAAGATTTCACGGCTCAGCACAGCCTCTTCCAAAGGGTAATCTATACCAACGAGATTAGTTCTTTAGCG
Ogt_G300_S2	X	[mm10]chrX:101734216-101734276	350	GTCGAATATACGTCTGTCGACTCCGCAGAGGGCTTTTCTGTCTTTTCTGCCACGCCTGTGGTCAGGTGAATACACTTAGAACGAGATTAGTTCTTTAGCG
Ogt_G300_S2	X	[mm10]chrX:101734629-101734689	351	GTCGAATATACGTCTGTCGATGAATGAAATCACGATGGGATTATAATGAGCCCAAAGTCATCTGGAATGTCCATTTAATGCGCAGATTTACCATTAGTCG
Ogt_G300_S2	X	[mm10]chrX:101734692-101734752	352	GTCGAATATACGTCTGTCGAAGATCAGATGGAACTATTCAGGAGCACGCTCAGGGGCTGGGAAATGCTTGATACCTCAGTCGCAGATTTACCATTAGTCG
Ogt_G300_S2	X	[mm10]chrX:101735057-101735117	353	GTCGAATATACGTCTGTCGAGACGCCAGCACTCTTAAAATTGGGTTTGGGTTCTTTCTGAGATAGCCTCATTCTGTAGCCACGAGATTAGTTCTTTAGCG
Ogt_G300_S2	X	[mm10]chrX:101735124-101735184	354	GTCGAATATACGTCTGTCGAGCTTTGAACTCTCAGTGACCTTCCTGGCTCAGCCTCACGAGAGCCGAGAGCCGGGATGATACGAGATTAGTTCTTTAGCG
Ogt_G300_S2	X	[mm10]chrX:101735482-101735542	355	GTCGAATATACGTCTGTCGACTATGTGACACTGGCTGGACTAGAACTCCACAGACTGGCCTCAAGCTCAGGGGCCTGCCTCGCAGATTTACCATTAGTCG
Ogt_G300_S2	X	[mm10]chrX:101735545-101735605	356	GTCGAATATACGTCTGTCGAGGCTGCTGGGATTAAAGTTGTGGGCCATCGTGTTTATCCTAAATGCAATTTTCTTTTTGACGCAGATTTACCATTAGTCG
Ogt_G300_S2	X	[mm10]chrX:101735903-101735963	357	GTCGAATATACGTCTGTCGAGGGGACTAAGGATTCCTGAGGGCCCGCCAGTCAGGATGTAGATGACTTGGCACTTGACTGACGAGATTAGTTCTTTAGCG
Ogt_G300_S2	X	[mm10]chrX:101735966-101736026	358	GTCGAATATACGTCTGTCGAATAGAGACAGAGATGACAGAAGCCTGGAAAACACGACAAAATTGCTTTAGTGCCCACAAGACGAGATTAGTTCTTTAGCG
Ogt_G300_S2	X	[mm10]chrX:101736324-101736384	359	GTCGAATATACGTCTGTCGACTGGCCCTTAGTCTCCCCATTTGTCCTCATTGATCTTTACCTTCCCAGGTTGCAGGGAGGCGCAGATTTACCATTAGTCG
Ogt_G300_S2	X	[mm10]chrX:101736387-101736447	360	GTCGAATATACGTCTGTCGAGCTGGACTGAAGGTCATGTGTAGAGAAGCCTTCCTTTCTGAGGCCTGGCAGCCAGATGTTCGCAGATTTACCATTAGTCG
Ogt_G300_S2	X	[mm10]chrX:101736745-101736805	361	GTCGAATATACGTCTGTCGATAGAACTTTCCATGCCAAGAGAGCCCATGATAGAGAGTAGTGGCTTATGGGACCTGTAAGACGAGATTAGTTCTTTAGCG
Ogt_G300_S2	X	[mm10]chrX:101736808-101736868	362	GTCGAATATACGTCTGTCGAGGCTGTGGCCAGGGCCAGTGGGCTAGTCCTCCATGAAAGTGGTTGGTCTCTGGCCTCAATACGAGATTAGTTCTTTAGCG
Ogt_G300_S2	X	[mm10]chrX:101737166-101737226	363	GTCGAATATACGTCTGTCGATTCCTGGGTCACAGAGCTGAGCCAACCCCTCACCTGGCCTTCTAATTTGGTTCTTTTTCACGCAGATTTACCATTAGTCG
Ogt_G300_S2	X	[mm10]chrX:101737229-101737289	364	GTCGAATATACGTCTGTCGACAAGACAAGGTCAGAGGCAACTACCTAGCCAAAAGCTCACAGCCTGTGTTCTGGTCTCTGCGCAGATTTACCATTAGTCG
Ogt_G300_S2	X	[mm10]chrX:101737587-101737647	365	GTCGAATATACGTCTGTCGAGTCATGTTTCCAAAAGCTCCCTAACTCAGTTGTCAGCCCCAGGCTGCCTTAAAAGTCTGCACGAGATTAGTTCTTTAGCG
Ogt_G300_S2	X	[mm10]chrX:101737650-101737710	366	GTCGAATATACGTCTGTCGAGACAAGACTGAGTCATGAAATGAGGTGTCTCATCTCTGGGCATCTTCCTTCCACACTCCTACGAGATTAGTTCTTTAGCG
Ogt_G300_S2	X	[mm10]chrX:101738008-101738068	367	GTCGAATATACGTCTGTCGAATTTTTTTAACCTCAGGTGCTGTTCTAAGTGGCTCGATGTTGCTATTGTGTTAGGTTTGACGCAGATTTACCATTAGTCG
Ogt_G300_S2	X	[mm10]chrX:101738071-101738131	368	GTCGAATATACGTCTGTCGAAAAGTCCATGCTGCCCAGGCTGACTTCATACCACTGTTAGGTTCCAAACGCTCTAAAATGCGCAGATTTACCATTAGTCG
Ogt_G300_S2	X	[mm10]chrX:101738429-101738489	369	GTCGAATATACGTCTGTCGAAGGCTTTCTCTACCCTTTTGCTGTCCCTCTTGCTGTCCCCGAGAGGTAGCCATAGCAGCTACGAGATTAGTTCTTTAGCG
Ogt_G300_S2	X	[mm10]chrX:101738492-101738552	370	GTCGAATATACGTCTGTCGAGATTCTCCTAAAAGCCTTTGGCTATTCTCTGCACCCTCCCACAAGAGGGAGCCATGGCAAACGAGATTAGTTCTTTAGCG
Ogt_G300_S2	X	[mm10]chrX:101738850-101738910	371	GTCGAATATACGTCTGTCGAAGCATGGTATTAGCTTTGGGGACCCTGTGCATGGTGCTGTGGCACTAGCTCTGCCTCTTACGCAGATTTACCATTAGTCG
Ogt_G300_S2	X	[mm10]chrX:101738913-101738973	372	GTCGAATATACGTCTGTCGACATCTGAGCTCCGATTTCTCCATCTAGGCAGGAATCCATCTGCATAAGGCACAGGCAGCACGCAGATTTACCATTAGTCG
Ogt_G300_S2	X	[mm10]chrX:101739273-101739333	373	GTCGAATATACGTCTGTCGAGAGTCACCACATACTGGAAAATCAAAGTCTTGAACTTGTATGAGGTTTGGAATTGTAATGACGAGATTAGTTCTTTAGCG
Ogt_G300_S2	X	[mm10]chrX:101739336-101739396	374	GTCGAATATACGTCTGTCGATTTGGCCTTGGGGCCTGAGTGCCATCTTGAATTTCCATATCTAAATTTATAGGTATAGGGACGAGATTAGTTCTTTAGCG
Ogt_G300_S2	X	[mm10]chrX:101740109-101740169	375	GTCGAATATACGTCTGTCGAATAGCAAATAAATATCAGAAGCAGGATTTCAAGCCGGGCTGGCTTCAGAGTCCATACTTACGCAGATTTACCATTAGTCG
Ogt_G300_S2	X	[mm10]chrX:101740172-101740232	376	GTCGAATATACGTCTGTCGACCAGTCTGTTCAGCTCTGACCAGGGAACACATTTTTTCTTGTGAATATTTCATTTGAAATCGCAGATTTACCATTAGTCG
Ogt_G300_S2	X	[mm10]chrX:101740566-101740626	377	GTCGAATATACGTCTGTCGAGAGTTGAGAGGGTAATAGAGGCAGAGAAAGGCAGAGAGAGGGAGAGAATAGAGAAGTAGAACGAGATTAGTTCTTTAGCG
Ogt_G300_S2	X	[mm10]chrX:101740633-101740693	378	GTCGAATATACGTCTGTCGACATGACCACGTGGAGAGAGGGGGGAAGGGAATGGGAAGAAAGTGGGGAAGGGAATGGAGAACGAGATTAGTTCTTTAGCG
Ogt_G300_S2	X	[mm10]chrX:101740990-101741050	379	GTCGAATATACGTCTGTCGAAATTATATCATTAAAACCTCAAGTTGTTTTGGATGATGGCTTAGGACAGCCTGCCCCTATCGCAGATTTACCATTAGTCG
Ogt_G300_S2	X	[mm10]chrX:101741053-101741113	380	GTCGAATATACGTCTGTCGACATTCATCGGATGGAACTCAGGTGAATTTTTACCTTACTTGTTAGTGAATAGAATCTCACCGCAGATTTACCATTAGTCG
Ogt_G50_S4	X	[mm10]chrX:101690973-101691033	1	AGTACAGTGCTCCTATGCGAACCCTACACCCTTTTGCATGAATAGTGTGGTTTCAGTGACTTTCCCTGTGAAATAATGGAACGAGATTAGTTCTTTAGCG
Ogt_G50_S4	X	[mm10]chrX:101691037-101691097	2	AGTACAGTGCTCCTATGCGAGAGAGCAATCTTTCCTCGCTGACTTAAAAGTCAGATTAACTAAAATGCCTACAATGTAAGACGAGATTAGTTCTTTAGCG
Ogt_G50_S4	X	[mm10]chrX:101691100-101691160	3	AGTACAGTGCTCCTATGCGACTTTTAAGGAAAGTAGAATGTCAAACCCAAGAGCCTGGTAATTCCAGTGAAGTCCTTCAGACGAGATTAGTTCTTTAGCG
Ogt_G50_S4	X	[mm10]chrX:101691586-101691646	5	AGTACAGTGCTCCTATGCGATCCAGGCCACATAGACAAACAGGGCCAGAACCACATGAACAGCAACAACAGCAACAATTGCGCAGATTTACCATTAGTCG
Ogt_G50_S4	X	[mm10]chrX:101691653-101691713	6	AGTACAGTGCTCCTATGCGAAAAATAGCTGTCTCTATTAGACATTCCAAGGGCACCTCCAAATATATAAGCTTTCGTTGTCGCAGATTTACCATTAGTCG
Ogt_G50_S4	X	[mm10]chrX:101691719-101691779	7	AGTACAGTGCTCCTATGCGACAAGCCGATAGGAACCGTGATCATTAAAGCTGTGAAGAACAGCAGTGTCTTCAGGGTTGCCGCAGATTTACCATTAGTCG
Ogt_G50_S4	X	[mm10]chrX:101691782-101691842	8	AGTACAGTGCTCCTATGCGATAAAGAGTTTTCATTTCTGAACTCTGGAGGCTGCAGCGCATTCAGCGCTGCTTTATCAAGCGCAGATTTACCATTAGTCG
Ogt_G50_S4	X	[mm10]chrX:101691890-101691950	9	AGTACAGTGCTCCTATGCGAGCGGAGGCTCAGCGGCGGCTAACAGGGTGACAGTCTATCAGCTGTTTTCTTTACCTACTTACGAGATTAGTTCTTTAGCG
Ogt_G50_S4	X	[mm10]chrX:101691953-101692013	10	AGTACAGTGCTCCTATGCGATGTACCTCCAAAGCCCTAACATGGATTCGTTTGTTAGAATCTGGGTACTGTGAGTCACAAACGAGATTAGTTCTTTAGCG
Ogt_G50_S4	X	[mm10]chrX:101692016-101692076	11	AGTACAGTGCTCCTATGCGATTAGTAGTCTCGGGATCTGTATTCTGACTCACAACTATAAAATCCCAGCACTGGGAGACTACGAGATTAGTTCTTTAGCG
Ogt_G50_S4	X	[mm10]chrX:101692079-101692139	12	AGTACAGTGCTCCTATGCGAACAGGAGAATTACCAGAGGTTCAAGGACATCCCAGGTTAAATAGTGAAAGCCTGTCTTAAACGAGATTAGTTCTTTAGCG
Ogt_G50_S4	X	[mm10]chrX:101692187-101692247	13	AGTACAGTGCTCCTATGCGACAGTGGTGGGATGAAGTCAGGTAGGCATCAGAGCCTGTACTTCACCCTCGTTAAGAGTGCCGCAGATTTACCATTAGTCG
Ogt_G50_S4	X	[mm10]chrX:101692250-101692310	14	AGTACAGTGCTCCTATGCGAACCTCTTTCATCTTTGGCTCCTCCCGCATTCAAAGAATTGCCTGACAGGTAAATTTCTATCGCAGATTTACCATTAGTCG
Ogt_G50_S4	X	[mm10]chrX:101692313-101692373	15	AGTACAGTGCTCCTATGCGACTCTGAACTGCCTGTCATTTAACTTTTTGTGTGTAGATTTTAAACAGGATTTCGTGTAGCCGCAGATTTACCATTAGTCG
Ogt_G50_S4	X	[mm10]chrX:101692376-101692436	16	AGTACAGTGCTCCTATGCGAAGCTGGCCTTGAACTTCAGATCCTCCTATGATGTTAAAGAGATCACAAGTCTTGTCACTGCGCAGATTTACCATTAGTCG
Ogt_G50_S4	X	[mm10]chrX:101692487-101692547	17	AGTACAGTGCTCCTATGCGAGATAGGGTCTCACTACATAACCCTGGCTGGTTTCAAACTTAACCTTTTGCTTCAACTTCTACGAGATTAGTTCTTTAGCG
Ogt_G50_S4	X	[mm10]chrX:101692554-101692614	18	AGTACAGTGCTCCTATGCGAGGAATTACAGGTATGTGCCACCATACCTGGCTGAGAGTTAAAAATTTGACTCCTAACTTAACGAGATTAGTTCTTTAGCG
Ogt_G50_S4	X	[mm10]chrX:101692680-101692740	20	AGTACAGTGCTCCTATGCGACTCATCTCAAGTGCTGGGAAGTATAGGTATGTATTACCACAGGCAGCTTACGTTTTTCTTACGAGATTAGTTCTTTAGCG
Ogt_G50_S4	X	[mm10]chrX:101692807-101692867	21	AGTACAGTGCTCCTATGCGAAATTTTACATCATGAACCCTAGTCATATTCACTTCCCAGTCTTCCCAGTTTTACTTGCTCCGCAGATTTACCATTAGTCG
Ogt_G50_S4	X	[mm10]chrX:101692870-101692930	22	AGTACAGTGCTCCTATGCGATTTGTGACCTTCCCCCTGACAAAGAAGAAAGCAAGTCCAGTTTGTGTTTCCCATATAGTCCGCAGATTTACCATTAGTCG
Ogt_G50_S4	X	[mm10]chrX:101692933-101692993	23	AGTACAGTGCTCCTATGCGAGGAGCATGGTCAAACTCCCAGTGGCCAGCCCCTTAAAGAGTGAGTCTTTTCTCATCACAACGCAGATTTACCATTAGTCG
Ogt_G50_S4	X	[mm10]chrX:101692996-101693056	24	AGTACAGTGCTCCTATGCGACTACCAGAAGCCCTCAATTGTGGAGCACTGCATACACTTCAGCATCCTTATCACAAGTTTCGCAGATTTACCATTAGTCG
Ogt_G50_S4	X	[mm10]chrX:101693095-101693155	25	AGTACAGTGCTCCTATGCGATCTGGGAGTGTGGTGGGATAGAGTGGTTTCTTATACCTACCATTGACCAAGCCAGCTCAGACGAGATTAGTTCTTTAGCG
Ogt_G50_S4	X	[mm10]chrX:101693161-101693221	26	AGTACAGTGCTCCTATGCGAAATAGGGCCTCGAGCGCAGGAATGAGGATTGAAAAGAAAAAGACAATTAGACAACATTATACGAGATTAGTTCTTTAGCG
Ogt_G50_S4	X	[mm10]chrX:101693288-101693348	28	AGTACAGTGCTCCTATGCGACTCTGTACTAGCAGTCAATAGGGTCAGTTCTCAGATCAAAGGCAAAGTGATTAAACAAGGACGAGATTAGTTCTTTAGCG
Ogt_G50_S4	X	[mm10]chrX:101693402-101693462	29	AGTACAGTGCTCCTATGCGAGGGCTTACAGGGGTTACCAAGACAAAAGGGAAGTCACACCTTCCTGGGCTGAATTTACCTCGCAGATTTACCATTAGTCG
Ogt_G50_S4	X	[mm10]chrX:101693469-101693529	30	AGTACAGTGCTCCTATGCGATGCAACAGCCCAGATGTGAATATTCTTATCTGAGACTACTTCTTCCTCCAGAGCCCAGTGCGCAGATTTACCATTAGTCG
Ogt_G50_S4	X	[mm10]chrX:101693533-101693593	31	AGTACAGTGCTCCTATGCGAGTACTTGCCAAATTTTTATAAGCAGCAAATTGCTATAAGCGGCACCACATACCATTTAGACGCAGATTTACCATTAGTCG
Ogt_G50_S4	X	[mm10]chrX:101693695-101693755	33	AGTACAGTGCTCCTATGCGAGGCAATTCAGTAAGGAATAGTACAGCTTGGAACTAGCGCTGTTAAAAATCAAGTTCTAGCACGAGATTAGTTCTTTAGCG
Ogt_G50_S4	X	[mm10]chrX:101693821-101693881	35	AGTACAGTGCTCCTATGCGATGTGTATAAGTGCACACGAACCCCATACACACATGTCCATAAACCATGCCTGAGCTGGTGACGAGATTAGTTCTTTAGCG
Ogt_G50_S4	X	[mm10]chrX:101693884-101693944	36	AGTACAGTGCTCCTATGCGAAGGCCCAAAAAGGGTGTCGGATCCCCTGGACCTGGAGTTATAGAGTAGTGATTGGCCATGACGAGATTAGTTCTTTAGCG
Ogt_G50_S4	X	[mm10]chrX:101693992-101694052	37	AGTACAGTGCTCCTATGCGACTTAACCACTGAGCATCTCTTCGACCCTACCTATTTTAATTTTTAAGAGATATACGCATGCGCAGATTTACCATTAGTCG
Ogt_G50_S4	X	[mm10]chrX:101694055-101694115	38	AGTACAGTGCTCCTATGCGATATGTATCTGTGTGTGTGGAGGCCACAAATTACTCTCCATCTTTTTAGGTCACTGTTTTGCGCAGATTTACCATTAGTCG
Ogt_G50_S4	X	[mm10]chrX:101694118-101694178	39	AGTACAGTGCTCCTATGCGATTCCCTCCTGCCCCACCCCCCATCTCCAAGCACTGAGATTAAAGAGGTCCCTGGACTTGGCGCAGATTTACCATTAGTCG
Ogt_G50_S4	X	[mm10]chrX:101694181-101694241	40	AGTACAGTGCTCCTATGCGACTGAATTTCTATGTTCATGCTTGTTCAATGAGCATTTTAATTGCTGAACCATCTTCCCTGCGCAGATTTACCATTAGTCG
Ogt_G50_S4	X	[mm10]chrX:101694299-101694359	41	AGTACAGTGCTCCTATGCGACCTGGGCTCCTGGGCTCCTGGACTCCCGGCTCAAGGAATACTTTGGCCTCAGCTTCCTGAACGAGATTAGTTCTTTAGCG
Ogt_G50_S4	X	[mm10]chrX:101694362-101694422	42	AGTACAGTGCTCCTATGCGAGCTAGCTGGGACTAGGCAGACATGCTAGTGCCCTTTGGGCTCAAGTATATACACATATTTACGAGATTAGTTCTTTAGCG
Ogt_G50_S4	X	[mm10]chrX:101694492-101694552	44	AGTACAGTGCTCCTATGCGAATATGTATGTGGTTTTGCTTGCATGTGTGTCTGTATATCATGTGTGTGCCTGGTGCCTCAACGAGATTAGTTCTTTAGCG
Ogt_G50_S4	X	[mm10]chrX:101694606-101694666	45	AGTACAGTGCTCCTATGCGAAGACACTGATTGGGTGCTGGGAATTAAACCCAGGTCCTCTGTAAGAACAAGTGCTCTCAACGCAGATTTACCATTAGTCG
Ogt_G50_S4	X	[mm10]chrX:101694669-101694729	46	AGTACAGTGCTCCTATGCGACGGAAATAAACATCTCTCCAGCCCCTCACCTACTTTTTTCTTTCCCGAGACAGGTTTCACCGCAGATTTACCATTAGTCG
Ogt_G50_S4	X	[mm10]chrX:101694732-101694792	47	AGTACAGTGCTCCTATGCGAGTGGCTGTTCTGGAACTCACTATGCAGACTCAATAGAGTCTGCCTCCCTCTACTTCTCAACGCAGATTTACCATTAGTCG
Ogt_G50_S4	X	[mm10]chrX:101694795-101694855	48	AGTACAGTGCTCCTATGCGACTGGAATTAAGGCTTAAAGGTCTGCACCACCATGCCTAGCCCCTCAATTTTAAGCCCACACGCAGATTTACCATTAGTCG
Ogt_G50_S4	X	[mm10]chrX:101694916-101694976	49	AGTACAGTGCTCCTATGCGAGGTGTGGCAAAAAAAAAGAAAATAATAATTGTGAAGTATATAGGTGTCTGCCAGGGGAAGACGAGATTAGTTCTTTAGCG
Ogt_G50_S4	X	[mm10]chrX:101694979-101695039	50	AGTACAGTGCTCCTATGCGAAGTGGAAAAAGCACTAGCTTTTTCTTGTGTTTGGAACGGACACTGGGAAGTTTAAAGTAAACGAGATTAGTTCTTTAGCG
Ogt_G50_S4	X	[mm10]chrX:101695042-101695102	51	AGTACAGTGCTCCTATGCGAACTTTTTTTTTTCTCCAGGGTCTGACAGTTCTTGAGGCCAGCACCATAGTTCTTTGTCGCACGAGATTAGTTCTTTAGCG
Ogt_G50_S4	X	[mm10]chrX:101695105-101695165	52	AGTACAGTGCTCCTATGCGAATGTTTTTCCGTTGCTCCTCCTTTCTCTCATCTAGGGGTCTAAATAGTCCTTTTCTGCAAACGAGATTAGTTCTTTAGCG
Ogt_G50_S4	X	[mm10]chrX:101695502-101695562	53	AGTACAGTGCTCCTATGCGACAAAGGAGGATTATGAATTCCCGGCCGGCCTGGTCTACACAGACCAGATCTCAAAAACAACGCAGATTTACCATTAGTCG
Ogt_G50_S4	X	[mm10]chrX:101695565-101695625	54	AGTACAGTGCTCCTATGCGAGGATGCGTGGGTTGCTTGAGACCTTTACCCGTTAGTGGCAGATTCGGACTTGAGTTACAACGCAGATTTACCATTAGTCG
Ogt_G50_S4	X	[mm10]chrX:101695628-101695688	55	AGTACAGTGCTCCTATGCGATATATTCAAATGGCGCACTTCAGTGCGGTGCAGTGATATCCAGTACCAGAAACACTGGAGCGCAGATTTACCATTAGTCG
Ogt_G50_S4	X	[mm10]chrX:101695693-101695753	56	AGTACAGTGCTCCTATGCGAATCACAAATTCATAATTCTAGAATTCAAATTTGCCTTATGATCATGCGTGGTAGGTGGGGCGCAGATTTACCATTAGTCG
Ogt_G50_S4	X	[mm10]chrX:101695801-101695861	57	AGTACAGTGCTCCTATGCGACCCTATAAAAGGCGCGGGGCGCGCGCGCCCATTTTAGACCGCTCGGGGAGCCGTTGGCGGACGAGATTAGTTCTTTAGCG
Ogt_G50_S4	X	[mm10]chrX:101695864-101695924	58	AGTACAGTGCTCCTATGCGAAGACCTTCTGCCAGGCCAGATCAGACCGGACCAGACGCGGACCCGGACACGGGAGAACAGACGAGATTAGTTCTTTAGCG
Ogt_G50_S4	X	[mm10]chrX:101695927-101695987	59	AGTACAGTGCTCCTATGCGACGCAAATGGGCCTTCGGTTCTGTGTGGGAACTTGGCAACCTTCGGACCGTTTTCCCACACACGAGATTAGTTCTTTAGCG
Ogt_G50_S4	X	[mm10]chrX:101695990-101696050	60	AGTACAGTGCTCCTATGCGAAAAAAAGTGCCGAGTGGGGCCGGGGGTGTAGCTGGGACCTTGGGTTTGATGCGAAGCCCTACGAGATTAGTTCTTTAGCG
Ogt_G50_S4	X	[mm10]chrX:101696098-101696158	61	AGTACAGTGCTCCTATGCGATTAGTCACCGAGTGGGGTGATCTTCAGAGAGTCTCGAGACGGTCGTGAGGATGCTGGGGCCGCAGATTTACCATTAGTCG
Ogt_G50_S4	X	[mm10]chrX:101696161-101696221	62	AGTACAGTGCTCCTATGCGACAGGGCTGATGGCGGACTGGTAGACGCCGGAGTGAGGTGGTTTTGAGACTTGAGACGACGCGCAGATTTACCATTAGTCG
Ogt_G50_S4	X	[mm10]chrX:101696228-101696288	63	AGTACAGTGCTCCTATGCGAGGATGGGGGGCGGACAGGGCTGATGGCAGACTGGTAGACGCCCGAGTTGGGGTGGTTTTTCGCAGATTTACCATTAGTCG
Ogt_G50_S4	X	[mm10]chrX:101696291-101696351	64	AGTACAGTGCTCCTATGCGAACTTGAGACGACGGTCGTGAGGATGGGGGGCGGACAGGGCTGATGGCGGACTGGTAGACGCGCAGATTTACCATTAGTCG
Ogt_G50_S4	X	[mm10]chrX:101696406-101696466	65	AGTACAGTGCTCCTATGCGACAGGGCTGATGGCGGACTGGTAGACGCCGGAGTGAGGTGGTTTTGAGACTTGAGACGACGACGAGATTAGTTCTTTAGCG
Ogt_G50_S4	X	[mm10]chrX:101696473-101696533	66	AGTACAGTGCTCCTATGCGAGGATGGGGGGCGGACAGGGCTGATGGCGGACTGGTAGACGCCCGAGTTGGGGTGGTTTTTACGAGATTAGTTCTTTAGCG
Ogt_G50_S4	X	[mm10]chrX:101696536-101696596	67	AGTACAGTGCTCCTATGCGAACTTGAGACGACGGTCGTGAGGATGGGGGGCGGACAGGGCTGATGGCGGACTGGTAGACGACGAGATTAGTTCTTTAGCG
Ogt_G50_S4	X	[mm10]chrX:101696600-101696660	68	AGTACAGTGCTCCTATGCGAAGTGAGGTGGTTTTGAGACTTGAGACGACGGTCGTGAGGATGTGGGGGCGGACAGGGCTGACGAGATTAGTTCTTTAGCG
Ogt_G50_S4	X	[mm10]chrX:101696721-101696781	69	AGTACAGTGCTCCTATGCGAGGATGGGGGGCGGACAGGGCTGATGGCGGACTGGTAGACGCCGGAGTGAGGTGGTTTTGACGCAGATTTACCATTAGTCG
Ogt_G50_S4	X	[mm10]chrX:101696785-101696845	70	AGTACAGTGCTCCTATGCGATGAGACGACGGTCGTGAGGATGTGGGGGCGGACAGGGCCGATGGCGGCACTCGAGTGGGGCGCAGATTTACCATTAGTCG
Ogt_G50_S4	X	[mm10]chrX:101696848-101696908	71	AGTACAGTGCTCCTATGCGATTTTGAGAAGGGCATGAGGAAGTGGGGGTGCGGCGGCAGGGCCCATAGACTCTTGAGTCTCGCAGATTTACCATTAGTCG
Ogt_G50_S4	X	[mm10]chrX:101696911-101696971	72	AGTACAGTGCTCCTATGCGAGATGGTCGTGGGGTTGCGGGGGCAGACATGGCCGATGGCCGTCGGTTACTCGGCGGAGGACGCAGATTTACCATTAGTCG
Ogt_G50_S4	X	[mm10]chrX:101697005-101697065	73	AGTACAGTGCTCCTATGCGAAGCGGCTGAGGAAGGGGGCCGCGGACGATGAAGAAGGAGAGGGGGGCGGGGCGGGGCTGTACGAGATTAGTTCTTTAGCG
Ogt_G50_S4	X	[mm10]chrX:101697068-101697128	74	AGTACAGTGCTCCTATGCGAGGGCACAGACTACAGGTGACAGAGAAGGCCGAGGCAGGGTGGTGATGGGCGCCGGAAAAAACGAGATTAGTTCTTTAGCG
Ogt_G50_S4	X	[mm10]chrX:101697131-101697191	75	AGTACAGTGCTCCTATGCGAGAGGGGTGGCGGGACACGAGCGGCGGAGAAAGCCGAGGGGTGGCGGGACACGGGCGCGGGACGAGATTAGTTCTTTAGCG
Ogt_G50_S4	X	[mm10]chrX:101697194-101697254	76	AGTACAGTGCTCCTATGCGAAAGCCGAGGGGGGGGGGAAGCGCGGGAAAAAGCCGAGGGGTGGCGGGACACGGGCGCCGGACGAGATTAGTTCTTTAGCG
Ogt_G50_S4	X	[mm10]chrX:101697306-101697366	77	AGTACAGTGCTCCTATGCGACGGGACACGGGCGCGGGAAAAAGCCAAGGGGGGTTGGGACACAGGCGCGGGAAAAAGCCGCGCAGATTTACCATTAGTCG
Ogt_G50_S4	X	[mm10]chrX:101697369-101697429	78	AGTACAGTGCTCCTATGCGAAGGGGCGGGACACGGGCGCCGGAAAAAGCCGAGGGGGGGAGGCGCCGGAAAAAGCCGAGGCGCAGATTTACCATTAGTCG
Ogt_G50_S4	X	[mm10]chrX:101697432-101697492	79	AGTACAGTGCTCCTATGCGAGTCGGGACACGAGTGGCAGAAAAAGCCGAAGAGGGTGGGACACGCGACGGAAAAGCCTTGCGCAGATTTACCATTAGTCG
Ogt_G50_S4	X	[mm10]chrX:101697497-101697557	80	AGTACAGTGCTCCTATGCGAGCGGGACGCGGGCGCGGGCGCGGGAAAAAGCCGAGGGGGGGGGCGTGGGCGACGGAGAAACGCAGATTTACCATTAGTCG
Ogt_G50_S4	X	[mm10]chrX:101697600-101697660	81	AGTACAGTGCTCCTATGCGATTCCGCGGGACACGAGCGACGGAAAAAGTCGAGGGGTGGCGGGACAGGGGCGCGGGAAAAACGAGATTAGTTCTTTAGCG
Ogt_G50_S4	X	[mm10]chrX:101697663-101697723	82	AGTACAGTGCTCCTATGCGACGAGGGGGGCGCAGGACACGGGCGACGGAAAAAGCCGAGGAGGGTGGGACGGGCGACGGAACGAGATTAGTTCTTTAGCG
Ogt_G50_S4	X	[mm10]chrX:101697730-101697790	83	AGTACAGTGCTCCTATGCGAGAGGAAGGTGGGACACGCGACGGAAAAGCCTAGGGGTGGCGGGACGCCGGCAACGGAAAAACGAGATTAGTTCTTTAGCG
Ogt_G50_S4	X	[mm10]chrX:101697793-101697853	84	AGTACAGTGCTCCTATGCGACGAGGGGTGGCGGGACACGGGCGCGGGAAAAAGCCGAGGGGGGTGCTCGGGACACGAGCGACGAGATTAGTTCTTTAGCG
Ogt_G50_S4	X	[mm10]chrX:101697901-101697961	85	AGTACAGTGCTCCTATGCGATGTCGGGACACAGGCGCCGGAAAAAGCCGAGGGGTTCCGCGGGACACGGGCGACGGAAAACGCAGATTTACCATTAGTCG
Ogt_G50_S4	X	[mm10]chrX:101697964-101698024	86	AGTACAGTGCTCCTATGCGACGAGGCGGGTGGGACACGCGACGGAAAAGGCCGAGTCTGGGACAGGGACAACGGTGGCTTCGCAGATTTACCATTAGTCG
Ogt_G50_S4	X	[mm10]chrX:101698027-101698087	87	AGTACAGTGCTCCTATGCGAACCTAGTCTTGTGCCTAGTCTTAGCATGCCTTGGAAGAATGGTGCATCTCGGCCTGCACACGCAGATTTACCATTAGTCG
Ogt_G50_S4	X	[mm10]chrX:101698090-101698150	88	AGTACAGTGCTCCTATGCGATTGGGAGGCCACAGCTTCGTGGAGATGTCCCAAGAGGGTAGAAATGTTGCTGTGTTGGCGCGCAGATTTACCATTAGTCG
Ogt_G50_S4	X	[mm10]chrX:101698198-101698258	89	AGTACAGTGCTCCTATGCGAGAACAGTTAGGACGACCATAGCCAGTGTAGTAGTTAGTGGCCTAGCAGGAGGAGTGAGGGACGAGATTAGTTCTTTAGCG
Ogt_G50_S4	X	[mm10]chrX:101698261-101698321	90	AGTACAGTGCTCCTATGCGAGGATCGAAGCCTGATTGGTGGAAGCTCCCAGAGGTGAGGAGCGCAGTTACGTTTCTCGAAACGAGATTAGTTCTTTAGCG
Ogt_G50_S4	X	[mm10]chrX:101698324-101698384	91	AGTACAGTGCTCCTATGCGATCCAGAAAATGGCGGCAGCTCTTGGGATGGGACGCAGGATCTCACAGGAATGTTGGAGAAACGAGATTAGTTCTTTAGCG
Ogt_G50_S4	X	[mm10]chrX:101698387-101698447	92	AGTACAGTGCTCCTATGCGACGAGGTCTGCGCAGCCAATGGGAAGCCGTGGAGACAGAGCGGGCCATTGCGCAGTAAGAGACGAGATTAGTTCTTTAGCG
Ogt_G50_S4	X	[mm10]chrX:101698495-101698555	93	AGTACAGTGCTCCTATGCGAGTAGCTCGCTCGTTGAGGCTAGGCCAGACTAGAGTGAGCTCAGAAAGACTCCCCCCCTCCCGCAGATTTACCATTAGTCG
Ogt_G50_S4	X	[mm10]chrX:101698558-101698618	94	AGTACAGTGCTCCTATGCGAGCGCCGGATCCAGCCAGTCTGAGCTGCAGCTAGATCGAGTTCGGCTGCAGGGGTGACTTCCGCAGATTTACCATTAGTCG
Ogt_G50_S4	X	[mm10]chrX:101698621-101698681	95	AGTACAGTGCTCCTATGCGATGTGGCTGTCACACCATAAGAGCAGCTTTAGGGAGAATAGGGGTTGAGCAAAAAACTACTCGCAGATTTACCATTAGTCG
Ogt_G50_S4	X	[mm10]chrX:101699097-101699157	97	AGTACAGTGCTCCTATGCGAGGATCCTCTTGCATCAGATTTCCAAATTCTGAGATGACAGCATGCAACACCACACTCACCACGAGATTAGTTCTTTAGCG
Ogt_G50_S4	X	[mm10]chrX:101699160-101699220	98	AGTACAGTGCTCCTATGCGATTTAAAAGAGTAAATTATAGGGGTTGGGATGTAGCTCAGTTGATAAGAGTATCTGCCTACACGAGATTAGTTCTTTAGCG
Ogt_G50_S4	X	[mm10]chrX:101699223-101699283	99	AGTACAGTGCTCCTATGCGAGCATCAAACCCTGGGTTCAGTCACCAGCATTGCATTAAAGCTGGGTTTGGCAGGCACAGTACGAGATTAGTTCTTTAGCG
Ogt_G50_S4	X	[mm10]chrX:101699286-101699346	100	AGTACAGTGCTCCTATGCGAGTAATCCCAGTCCTTAAGAGGGGAAAGAGGGAGGAGGATAAAAACTTCAAGGTCATCTTCACGAGATTAGTTCTTTAGCG
Ogt_G50_S4	X	[mm10]chrX:101699401-101699461	101	AGTACAGTGCTCCTATGCGATTGGTTTGTGGGTAACGTCTTGCTATTAAGACCAACCTGAACTCATTTAATGACTTAAAGCGCAGATTTACCATTAGTCG
Ogt_G50_S4	X	[mm10]chrX:101699464-101699524	102	AGTACAGTGCTCCTATGCGATTTCTGATGTTGCATTTCAGAAACTGGTTGTTCCCGACATTGATACCTTATGGACTATGTCGCAGATTTACCATTAGTCG
Ogt_G50_S4	X	[mm10]chrX:101699590-101699650	104	AGTACAGTGCTCCTATGCGAGCAGCAGCAGCAGCAGCAGTAGCAGTGGCAGCAGCAGTGGCAGCTGCAGCACCAGTGGCACGCAGATTTACCATTAGTCG
Ogt_G50_S4	X	[mm10]chrX:101700621-101700681	105	AGTACAGTGCTCCTATGCGAGAAGATCTTCATGTTTCCCTTTTGTGTTGTTTACCTCTTTTTGGTTCCTGGATCTTCTTTACGAGATTAGTTCTTTAGCG
Ogt_G50_S4	X	[mm10]chrX:101700684-101700744	106	AGTACAGTGCTCCTATGCGATTCCTCTCTGTCTTTCATGTCTTTCATTCTTTTGTCTCTTCTATTTCCATCCCCCCTTTGACGAGATTAGTTCTTTAGCG
Ogt_G50_S4	X	[mm10]chrX:101700747-101700807	107	AGTACAGTGCTCCTATGCGAATTTATTGCTGGACATAGAGTCTAAGGTAAGTAAGTACTCTACAACTGACCTATGTCCCCACGAGATTAGTTCTTTAGCG
Ogt_G50_S4	X	[mm10]chrX:101700923-101700983	109	AGTACAGTGCTCCTATGCGATTAGACATGCCTGAACTGCCAAAACAGAGAAAGGCTAGGTAAGTGGGAGAATTGTTGAAACGCAGATTTACCATTAGTCG
Ogt_G50_S4	X	[mm10]chrX:101701053-101701113	111	AGTACAGTGCTCCTATGCGAAACTCTCTGTAGACTAGGCTGGCCTCTAATAGAGATCTGGCTGCTCCTGTTTCCTGATTGCGCAGATTTACCATTAGTCG
Ogt_G50_S4	X	[mm10]chrX:101701116-101701176	112	AGTACAGTGCTCCTATGCGAGGATTAAAGGTCTGTATCACCGTGCTTGGCTAGTTTTTGGCTTTTTGAGTCTGGGTCTCACGCAGATTTACCATTAGTCG
Ogt_G50_S4	X	[mm10]chrX:101701227-101701287	113	AGTACAGTGCTCCTATGCGATGTAGCATCTGCTTAAGTGCTAAGATTATAGGCATACACCATCATGTTCAGCTAATTAGTACGAGATTAGTTCTTTAGCG
Ogt_G50_S4	X	[mm10]chrX:101701353-101701413	115	AGTACAGTGCTCCTATGCGATCTTGTCTTCTGTGATCCTGCCTCCAGGTGATCTCATGAGTGTTCTGTGATTCTATTGATACGAGATTAGTTCTTTAGCG
Ogt_G50_S4	X	[mm10]chrX:101701420-101701480	116	AGTACAGTGCTCCTATGCGATCAAATAGCTCACTGTTAGGAAAATCAAGGTGCTTAAGCATTTAGAACTTTATAGCCCAGACGAGATTAGTTCTTTAGCG
Ogt_G50_S4	X	[mm10]chrX:101701601-101701661	118	AGTACAGTGCTCCTATGCGAGGCTAACTCACTATGTAGACAAGGCTGGTCTCAAACTAGCAGAGATCACATGGCCTCTGTCGCAGATTTACCATTAGTCG
Ogt_G50_S4	X	[mm10]chrX:101701668-101701728	119	AGTACAGTGCTCCTATGCGAGTTCTGGGATTAAAGGCATGTGCCACCATGCCAACCAAGAAGACTTAAAAAAATGGTTTCCGCAGATTTACCATTAGTCG
Ogt_G50_S4	X	[mm10]chrX:101701735-101701795	120	AGTACAGTGCTCCTATGCGATATGTATATAAGCATTTACCTACTTTTATGTATGTGCGCTTAGTACCTGTGAAGGCTAGGCGCAGATTTACCATTAGTCG
Ogt_G50_S4	X	[mm10]chrX:101703056-101703116	121	AGTACAGTGCTCCTATGCGACAAATGTGTCTCAAAGTTGATGAAAATGATAATCCTCCTGATGAGTTTTTCACTTCCACCACGAGATTAGTTCTTTAGCG
Ogt_G50_S4	X	[mm10]chrX:101703119-101703179	122	AGTACAGTGCTCCTATGCGAACTATTTGAGTACTGGCACTCTGACAAGGCCCAGTTTATTCTCAGTACCTGACAGATGCCACGAGATTAGTTCTTTAGCG
Ogt_G50_S4	X	[mm10]chrX:101703246-101703306	124	AGTACAGTGCTCCTATGCGAGATAGAGTCATTTTCAATGAAGGGGGACAGAGTTGATATAGGAAACAACCAAAAGTTAACACGAGATTAGTTCTTTAGCG
Ogt_G50_S4	X	[mm10]chrX:101703358-101703418	125	AGTACAGTGCTCCTATGCGATGTGCTCATATTTTCTTTTTTTCCCCCACCTTATTACTTAGCTGTGTCGTGATTGACTCCCGCAGATTTACCATTAGTCG
Ogt_G50_S4	X	[mm10]chrX:101703421-101703481	126	AGTACAGTGCTCCTATGCGATCCGACTCCGACAATACCAGTGACGAAAAGAACACTACAGTCTGTGAAATAAGCAGTGGACGCAGATTTACCATTAGTCG
Ogt_G50_S4	X	[mm10]chrX:101703484-101703544	127	AGTACAGTGCTCCTATGCGAAAGTATCATCTCTGTTTAGAGAAACAACTGAGCTCTGAAGCCTTATTACATGTGGTAGTTCGCAGATTTACCATTAGTCG
Ogt_G50_S4	X	[mm10]chrX:101703551-101703611	128	AGTACAGTGCTCCTATGCGACAGATTCTGCAAACTTTAAGTTTCTTATGCTTTCATATCCAGTGCCACCATTTCTTTCTCCGCAGATTTACCATTAGTCG
Ogt_G50_S4	X	[mm10]chrX:101703659-101703719	129	AGTACAGTGCTCCTATGCGATTTCCTAACACAGTTGCCACTCTTTCTGCTGCCTTTGACTCTGGATAGAATTCTATCCATACGAGATTAGTTCTTTAGCG
Ogt_G50_S4	X	[mm10]chrX:101703722-101703782	130	AGTACAGTGCTCCTATGCGAGAGCTGTGCTCCTCCCTCTTCCTTTTTTACCATCCTTTAGAGGTAGGAATGACAAGGAAGACGAGATTAGTTCTTTAGCG
Ogt_G50_S4	X	[mm10]chrX:101703785-101703845	131	AGTACAGTGCTCCTATGCGAAGTCTTCCCAGCTTGGTGGAGACTGGGCTGGGGGGAGGTTAACAGTGTGAACAGTGCCAAACGAGATTAGTTCTTTAGCG
Ogt_G50_S4	X	[mm10]chrX:101703848-101703908	132	AGTACAGTGCTCCTATGCGACTATCTCCATATATTATTGTACAAGGTAGTGGGTTCCAAAAGTTCAGTCAGGCCACAACTACGAGATTAGTTCTTTAGCG
Ogt_G50_S4	X	[mm10]chrX:101703971-101704031	133	AGTACAGTGCTCCTATGCGATATTGAAGTAATTCCCCTTATTTTGCTATGGACCACAAGGCAGCAGATTTGTCTTTAGGACGCAGATTTACCATTAGTCG
Ogt_G50_S4	X	[mm10]chrX:101704034-101704094	134	AGTACAGTGCTCCTATGCGAACTGAGCTCATGCTGTTTAGACAGGTGATTTCAAAGTGGGCATAATACTTTCATTGCTAACGCAGATTTACCATTAGTCG
Ogt_G50_S4	X	[mm10]chrX:101704164-101704224	136	AGTACAGTGCTCCTATGCGAGATTTAGAATGTCCAAGTACTCAACCACTTTTAGTTTAATTTGTGCTCAATATCCTGCCGCGCAGATTTACCATTAGTCG
Ogt_G50_S4	X	[mm10]chrX:101704272-101704332	137	AGTACAGTGCTCCTATGCGAATTTCAGATGAGACTTCTGACATTGATCGTCCCGGAGGTCAGAAGCTTCCACTAATTGTTACGAGATTAGTTCTTTAGCG
Ogt_G50_S4	X	[mm10]chrX:101704335-101704395	138	AGTACAGTGCTCCTATGCGAGATGATGATGATGATGGCAGCCCTGATTTGAAGAATACTAAGCAGAAAAGTGATGAGCCCACGAGATTAGTTCTTTAGCG
Ogt_G50_S4	X	[mm10]chrX:101704398-101704458	139	AGTACAGTGCTCCTATGCGAATGTCGGTGCTTGAAAAAGAGGGGGTTGAATGTATTGGTTCTGACTCGACTTCACCTCATACGAGATTAGTTCTTTAGCG
Ogt_G50_S4	X	[mm10]chrX:101704461-101704521	140	AGTACAGTGCTCCTATGCGAGTTTGTGAAATATGGGATGTTTGTGGGAGTTCCAACCAGACATCAAGTGAGCTTGAGCCAACGAGATTAGTTCTTTAGCG
Ogt_G50_S4	X	[mm10]chrX:101704579-101704639	141	AGTACAGTGCTCCTATGCGACCGAATCTGAGGCCAAGGGGGAGCCCGAATCTGAGGCCAAGGGGGAGTCCGAATCTGAAGCGCAGATTTACCATTAGTCG
Ogt_G50_S4	X	[mm10]chrX:101704642-101704702	142	AGTACAGTGCTCCTATGCGAAGGGGGAGATGGAGACTGAGGCCAAGGGGGAGTCCGAATCTGAAGCCAAGGGGGAGATGGCGCAGATTTACCATTAGTCG
Ogt_G50_S4	X	[mm10]chrX:101704705-101704765	143	AGTACAGTGCTCCTATGCGACTGAGGCCAAGGGGGAGTCCGAATCTGAAGCCAAGGGGGAGATGGAGACTGAGGCCAAGGCGCAGATTTACCATTAGTCG
Ogt_G50_S4	X	[mm10]chrX:101704771-101704831	144	AGTACAGTGCTCCTATGCGACCGAATCTGAAGCCAAGGGGGAGATGGAGACTGAGGCCAAGGGGGAGCCCGAATCTGAAGCGCAGATTTACCATTAGTCG
Ogt_G50_S4	X	[mm10]chrX:101704876-101704936	145	AGTACAGTGCTCCTATGCGAAAGCCAAGGGGGAGATGGAGACTGAGGCCAAGGGGGAGTCCGAATCTGAAGCCAAGGGGGACGAGATTAGTTCTTTAGCG
Ogt_G50_S4	X	[mm10]chrX:101704939-101704999	146	AGTACAGTGCTCCTATGCGATGGAGACTGAGGCCAAGGGGGAGCCCGAATCTGAAGCCAAGGGGGAGATGGAGACTGAGGACGAGATTAGTTCTTTAGCG
Ogt_G50_S4	X	[mm10]chrX:101705002-101705062	147	AGTACAGTGCTCCTATGCGAAGGGGGAGCCCGAATCTGAAGCCAAAGGGGAGCCCGAGCCCGAGGCTGCTAAGGGGGAGAACGAGATTAGTTCTTTAGCG
Ogt_G50_S4	X	[mm10]chrX:101705065-101705125	148	AGTACAGTGCTCCTATGCGAAGACTGAGGCTGCTATGGGGGAGGTGGAGACTGAGGCTGCTATGGGGGAGCCCGAGCAAGACGAGATTAGTTCTTTAGCG
Ogt_G50_S4	X	[mm10]chrX:101705171-101705231	149	AGTACAGTGCTCCTATGCGAGGCACAACAAAGGAAAAGAAAGAGAAAGAACAGATTCATATGTATGTCATCAAGTAAGCCCGCAGATTTACCATTAGTCG
Ogt_G50_S4	X	[mm10]chrX:101705234-101705294	150	AGTACAGTGCTCCTATGCGATAGGAAACGCCGTAGGGCTGACCCACAGGATGGGGCTGACCCACAGGATGGGGCTGACCCCGCAGATTTACCATTAGTCG
Ogt_G50_S4	X	[mm10]chrX:101705297-101705357	151	AGTACAGTGCTCCTATGCGAGGATCGGGCTGACCCACAGGATCTGGCTGACCCACAGGATAGGGGTGACTCACAGGATATCGCAGATTTACCATTAGTCG
Ogt_G50_S4	X	[mm10]chrX:101705360-101705420	152	AGTACAGTGCTCCTATGCGACAGCCTGCCAGGTACATCTGATGAGCCCATTCCATCGGGCCAGCCTGTTTGTCCCCGAAACGCAGATTTACCATTAGTCG
Ogt_G50_S4	X	[mm10]chrX:101705468-101705528	153	AGTACAGTGCTCCTATGCGAAGGCAGAGGCAGAGGCAGAGGCAGAGGCAGAGGCAGAGGGGCAAAGGCAGGAAAGTGAAAACGAGATTAGTTCTTTAGCG
Ogt_G50_S4	X	[mm10]chrX:101705531-101705591	154	AGTACAGTGCTCCTATGCGAGCCTTTTTGCAAATTGCCACTGGTTAGGGAGCGCCACTGTCCATTTTCCTTATGTTCCAGACGAGATTAGTTCTTTAGCG
Ogt_G50_S4	X	[mm10]chrX:101705594-101705654	155	AGTACAGTGCTCCTATGCGAATCAGCATTCCCCAATGTTCAATCCCCCTGCAGTGTTTGTTTCTTTTTCTTTTTCTTTTTACGAGATTAGTTCTTTAGCG
Ogt_G50_S4	X	[mm10]chrX:101706106-101706166	157	AGTACAGTGCTCCTATGCGAAGGGCTGGGACTAAAGGTGTGTACCACCACCGCCTGGCATAACAAATGTTTGATAAACTTCGCAGATTTACCATTAGTCG
Ogt_G50_S4	X	[mm10]chrX:101706169-101706229	158	AGTACAGTGCTCCTATGCGAAAATAAATGGCGCTTAACTGTTGGTTCCAAAGTCTCTGGTTGAAGTTATTGGTACTGTGGCGCAGATTTACCATTAGTCG
Ogt_G50_S4	X	[mm10]chrX:101706232-101706292	159	AGTACAGTGCTCCTATGCGATTGGAAGAAGGCAAAAAAGACTAGGTTTGACTTAGAAATTGAGTGAAGGTGCTGCTGGGGCGCAGATTTACCATTAGTCG
Ogt_G50_S4	X	[mm10]chrX:101706295-101706355	160	AGTACAGTGCTCCTATGCGATGGACTTTACTAGCCTCGTGGATAGTTAGTTGATCCATGAGGGCAAAGGGCCTGGGGGTGCGCAGATTTACCATTAGTCG
Ogt_G50_S4	X	[mm10]chrX:101706403-101706463	161	AGTACAGTGCTCCTATGCGAATCAACTTTACTTTTGGTGATTTGAGGCTTATAAAATTTTGAGGGGCTGTGGGTAGAAACACGAGATTAGTTCTTTAGCG
Ogt_G50_S4	X	[mm10]chrX:101706466-101706526	162	AGTACAGTGCTCCTATGCGACATGATGGACAAAGGTCATTGGCTGAAGGCTTAAAGCACCAAAATGCCTCATTAGCGTGAACGAGATTAGTTCTTTAGCG
Ogt_G50_S4	X	[mm10]chrX:101706529-101706589	163	AGTACAGTGCTCCTATGCGAAGCATTTCAGGAATCTCAGATACTAGCTGCTAACAGGTTTTTAATAGGAGATGGGGAAATACGAGATTAGTTCTTTAGCG
Ogt_G50_S4	X	[mm10]chrX:101706594-101706654	164	AGTACAGTGCTCCTATGCGACTTTAATCTAACTAAGGCTACATGACATTCCTCAGGTAGAGGCATGTCTCGGAGCTTAGAACGAGATTAGTTCTTTAGCG
Ogt_G50_S4	X	[mm10]chrX:101706709-101706769	165	AGTACAGTGCTCCTATGCGATGCCCCGAGCTTGGAGGCTTATCTAGTCAAGGTGGACTTTGACCTTAGAGTTTCCCACCCCGCAGATTTACCATTAGTCG
Ogt_G50_S4	X	[mm10]chrX:101706772-101706832	166	AGTACAGTGCTCCTATGCGAACCAATCTTTAGACTGCACTTGTCTTAGATGCTCAGGCAACCTAGCCTCCAAGAACCCTTCGCAGATTTACCATTAGTCG
Ogt_G50_S4	X	[mm10]chrX:101706835-101706895	167	AGTACAGTGCTCCTATGCGAAAAATTCTCTGTACCTGTGACAGTCTTACTGGTGACCCTAGATGGAGCCATTCAGAAGGTCGCAGATTTACCATTAGTCG
Ogt_G50_S4	X	[mm10]chrX:101706898-101706958	168	AGTACAGTGCTCCTATGCGAAGTATGCAGCCTGCCCATGCAGTCTTGTTGATGGGTGCTACCCTGTGATAGCTCTTCTTGCGCAGATTTACCATTAGTCG
Ogt_G50_S4	X	[mm10]chrX:101707006-101707066	169	AGTACAGTGCTCCTATGCGAAATCAACTATTGTCCTTTCAGCTGATAGTGGACAAAAAATTGGGGGGCTTTCTCAGAAAAACGAGATTAGTTCTTTAGCG
Ogt_G50_S4	X	[mm10]chrX:101707069-101707129	170	AGTACAGTGCTCCTATGCGAACATTGCGGCAAAAGTTGAAAAATGTAAGACTGGATACATGCTGCTCATGCGCTTGCTTGACGAGATTAGTTCTTTAGCG
Ogt_G50_S4	X	[mm10]chrX:101707132-101707192	171	AGTACAGTGCTCCTATGCGAGGGATTTGCACATTTTCTTTTGCATGTTCATCTGTCTGGTGGATACTGGAGACTCCCAAGACGAGATTAGTTCTTTAGCG
Ogt_G50_S4	X	[mm10]chrX:101707195-101707255	172	AGTACAGTGCTCCTATGCGAATGAAGGAGTCTGGCTGAATGAAGCTTTCTGACCCAAAGTGGGGATGCACATGCAGAGTAACGAGATTAGTTCTTTAGCG
Ogt_G50_S4	X	[mm10]chrX:101707291-101707351	173	AGTACAGTGCTCCTATGCGATCTAGCCATCCAGCCAAAGTGCCAAGCCTTTGTGCTCTCCTTAAATCCTAGTAGTTAACTCGCAGATTTACCATTAGTCG
Ogt_G50_S4	X	[mm10]chrX:101707354-101707414	174	AGTACAGTGCTCCTATGCGAAGAGTGCTCCTTCAAACTCAGAGCAGCTCTGGCTTCTGTCCTTAAACTCAGGTCAAAGATCGCAGATTTACCATTAGTCG
Ogt_G50_S4	X	[mm10]chrX:101707417-101707477	175	AGTACAGTGCTCCTATGCGATATGTGGCCAAGATAACTTTAGGTTTGACATAGCCTAGTTTACACTGATGTAAGCCAACACGCAGATTTACCATTAGTCG
Ogt_G50_S4	X	[mm10]chrX:101707480-101707540	176	AGTACAGTGCTCCTATGCGATTGAATGTGATGGGACATTTAATCCCAGCACTCAGAAGGCAGAGGCCAGATAATTAGGAGCGCAGATTTACCATTAGTCG
Ogt_G50_S4	X	[mm10]chrX:101707588-101707648	177	AGTACAGTGCTCCTATGCGATGATACTCTTACCTCAAAAACCAACAAACAAGGCAATTACAGAGGGGAAGGTAGAGCTTAACGAGATTAGTTCTTTAGCG
Ogt_G50_S4	X	[mm10]chrX:101707651-101707711	178	AGTACAGTGCTCCTATGCGAGTTTGATCTTGGATGGGAGGGAGGGTAGTTAAAAATGTTTTCTGAGTTTTTCCAATGCCTACGAGATTAGTTCTTTAGCG
Ogt_G50_S4	X	[mm10]chrX:101707714-101707774	179	AGTACAGTGCTCCTATGCGAACGAACATACTTCCCCCTTCTGTATTTATTCATGTTTTTTCTGTTTGGTAGGATTGGGATACGAGATTAGTTCTTTAGCG
Ogt_G50_S4	X	[mm10]chrX:101707777-101707837	180	AGTACAGTGCTCCTATGCGAAACCCTTGGCCTTGAACATGCTGGCAAGCATTCTGCCACTGGGCCACATCCATGCTATCCACGAGATTAGTTCTTTAGCG
Ogt_G50_S4	X	[mm10]chrX:101708479-101708539	181	AGTACAGTGCTCCTATGCGAAAAGGCGTGCGCCACCACGCCCGGCTGAGTAAGACATTTATAAAAACCCAGACGGGGCAACGCAGATTTACCATTAGTCG
Ogt_G50_S4	X	[mm10]chrX:101708542-101708602	182	AGTACAGTGCTCCTATGCGACCTCCCCAGCCCAGGTGCCACTAGGCACAGCATAAGAGACTAAGAATTCAACAGGGGAAACGCAGATTTACCATTAGTCG
Ogt_G50_S4	X	[mm10]chrX:101708605-101708665	183	AGTACAGTGCTCCTATGCGATGGACACTCAGGGTTTGGGAGTATAAGCCCCCACTTCTGGCTCAGGGGGTTGAGAAGCAGCGCAGATTTACCATTAGTCG
Ogt_G50_S4	X	[mm10]chrX:101708668-101708728	184	AGTACAGTGCTCCTATGCGAAAACAAAACGAACTTGGAAAAGAATTGGAAACCCAGCAGCTGCCTTCTGCAGGGATGGGCCGCAGATTTACCATTAGTCG
Ogt_G50_S4	X	[mm10]chrX:101708776-101708836	185	AGTACAGTGCTCCTATGCGAACTTGGGAAACCGTAAGGGACCGTCTTCAACTGGCCTTAAGAAAGTAAGACCAAATGGCTACGAGATTAGTTCTTTAGCG
Ogt_G50_S4	X	[mm10]chrX:101708839-101708899	186	AGTACAGTGCTCCTATGCGAGGGAGAATCCACAGGAAGGTGAAAAGGGAACGTGGCTGGGAGGGGGCAACAAGCCCCTTCACGAGATTAGTTCTTTAGCG
Ogt_G50_S4	X	[mm10]chrX:101708902-101708962	187	AGTACAGTGCTCCTATGCGATCTGGGCACAGGAAGTCAGCCAGGGCACAAGGTCCAGGCAGTGACCTCACAAGGACAGCAACGAGATTAGTTCTTTAGCG
Ogt_G50_S4	X	[mm10]chrX:101708965-101709025	188	AGTACAGTGCTCCTATGCGATTTTTGCAGCTTAGAGATCACCCACCTGTCCCCATCCTTACTCATTCTGCTCAGCACTGGACGAGATTAGTTCTTTAGCG
Ogt_G50_S4	X	[mm10]chrX:101709078-101709138	189	AGTACAGTGCTCCTATGCGACTCCTTCCTTGGAGGCAGCACTAGCCTTTGCCTCCTTGGCCTGGGGCTCTTGGCTCTCAGCGCAGATTTACCATTAGTCG
Ogt_G50_S4	X	[mm10]chrX:101709141-101709201	190	AGTACAGTGCTCCTATGCGACAGCGGCCTTCCCTTCTTGGGCAGTGCCCTCATCGCTGCAGGCGCTGAGATCCCCCTGCTCGCAGATTTACCATTAGTCG
Ogt_G50_S4	X	[mm10]chrX:101709204-101709264	191	AGTACAGTGCTCCTATGCGAGCTCTTCCTCTGTTGGCGAGGAGGCTGAAGAATCATCCCACCCTCCTTCCTATTTCTCTTCGCAGATTTACCATTAGTCG
Ogt_G50_S4	X	[mm10]chrX:101709271-101709331	192	AGTACAGTGCTCCTATGCGAAGGCCACTCAACTTGAAAGGCTTCTTGAAAGAGAATTTCTTCTTCTTGGGGTTCTCCTTGCGCAGATTTACCATTAGTCG
Ogt_G50_S4	X	[mm10]chrX:101709370-101709430	193	AGTACAGTGCTCCTATGCGAGCCGCTGGCTCGATGACATCGCCAGTAGGCCCAGCTGCCTCATCAAGGGTGGTGACTCCCACGAGATTAGTTCTTTAGCG
Ogt_G50_S4	X	[mm10]chrX:101709433-101709493	194	AGTACAGTGCTCCTATGCGACACCCTTGGGGTTTAAGTCTCCAGTGCTTTTTTCACGTGGCCATTCTCCTGTCCATTGGCACGAGATTAGTTCTTTAGCG
Ogt_G50_S4	X	[mm10]chrX:101709496-101709556	195	AGTACAGTGCTCCTATGCGACGCTGGGGAAGGCTGCCCATGATGGAGGTCTGCTGGGGGCGCCTGGAGCCGACTGGCGCTACGAGATTAGTTCTTTAGCG
Ogt_G50_S4	X	[mm10]chrX:101709559-101709619	196	AGTACAGTGCTCCTATGCGAGCTGCAGGGGATAGTTCGGCTGGGACGGCCCAGCGAGCAGAGGGGTGGGGCTGTGTCCGAACGAGATTAGTTCTTTAGCG
Ogt_G50_S4	X	[mm10]chrX:101716415-101716475	197	AGTACAGTGCTCCTATGCGAGCTCGGTGTCCCTGTGCTTTTTGCCCACTAAGAAGAAAGAAGCAGCTCATCATGTGCTCCCGCAGATTTACCATTAGTCG
Ogt_G50_S4	X	[mm10]chrX:101716478-101716538	198	AGTACAGTGCTCCTATGCGAACCCCTGTGAGCAAGGACTCTTCTCTGGATTCTGTATACACATTCAAGCTGTTTTCCCTACGCAGATTTACCATTAGTCG
Ogt_G50_S4	X	[mm10]chrX:101716541-101716601	199	AGTACAGTGCTCCTATGCGAGGATGCTTGTCTTGATAATACCCAGGTCACTTTGCTAGAGACTGACAAAGAAATGAGAAGCGCAGATTTACCATTAGTCG
Ogt_G50_S4	X	[mm10]chrX:101716604-101716664	200	AGTACAGTGCTCCTATGCGACCTCTTAGTGTCCTGATACTACCCTTTATCCAAAGGTGACCAGATTGAACTTTTACCTGTCGCAGATTTACCATTAGTCG
Ogt_G50_S4	X	[mm10]chrX:101716712-101716772	201	AGTACAGTGCTCCTATGCGACTGTATAAGCTGCTTGCTGGCCATAGTGTTGAATATGTCCAATCTGAGGGTCTTGTTGGTACGAGATTAGTTCTTTAGCG
Ogt_G50_S4	X	[mm10]chrX:101716775-101716835	202	AGTACAGTGCTCCTATGCGATTTAATGTGGGGTCCATAGGCTTTGAGGGAATGTTTGCTACACCCTGAGGCTAGCCTTTTACGAGATTAGTTCTTTAGCG
Ogt_G50_S4	X	[mm10]chrX:101716838-101716898	203	AGTACAGTGCTCCTATGCGAATTATACACTGAGGTCCCACTCTCTGCTGAAGTTGGCAGATAGTATAGGTTTTCATCTGCACGAGATTAGTTCTTTAGCG
Ogt_G50_S4	X	[mm10]chrX:101716905-101716965	204	AGTACAGTGCTCCTATGCGAGCTGATACATACTGCTTTCAATACTAGGAAACTAAAAGCAGAAGTGTTTTCTGTCACTTGACGAGATTAGTTCTTTAGCG
Ogt_G50_S4	X	[mm10]chrX:101717025-101717085	205	AGTACAGTGCTCCTATGCGAAAAAGGACCTCCTTTACTACAATGCCAGTGCCTCTGGCTTTGGTATCCATGTGGTGGGTACGCAGATTTACCATTAGTCG
Ogt_G50_S4	X	[mm10]chrX:101717092-101717152	206	AGTACAGTGCTCCTATGCGAGCAGGCAGCCATTGGGGATCAGTGCTTACAGCGGCTGACTGGGGTGGATTCAGATACCTACGCAGATTTACCATTAGTCG
Ogt_G50_S4	X	[mm10]chrX:101717159-101717219	207	AGTACAGTGCTCCTATGCGATGCTGCCAAAGGCAGCCAGTGATTAGAGAAGCTCAGCAGACTTTTTTTTTTTTTCTGAGGCGCAGATTTACCATTAGTCG
Ogt_G50_S4	X	[mm10]chrX:101717226-101717286	208	AGTACAGTGCTCCTATGCGAGCTTAATTTACTGGGGCTGGCACTCTGTGTGGCCAGCAGGAAAACTATGAATTAATTTAACGCAGATTTACCATTAGTCG
Ogt_G50_S4	X	[mm10]chrX:101717336-101717396	209	AGTACAGTGCTCCTATGCGAGGGGGGGGGGAGTGTGCACGCACGGACACACACACACACACACACCCAATGAACGAAACAACGAGATTAGTTCTTTAGCG
Ogt_G50_S4	X	[mm10]chrX:101717403-101717463	210	AGTACAGTGCTCCTATGCGAGAGTCCACCAACTTCATACACACAAATATGCATGTATGCATACATACATACACACATACAACGAGATTAGTTCTTTAGCG
Ogt_G50_S4	X	[mm10]chrX:101717467-101717527	211	AGTACAGTGCTCCTATGCGATGTATACAGACCTAAAGATAGACATATACATAGTCACACATAGAACAGCTAGAGCAAAGCACGAGATTAGTTCTTTAGCG
Ogt_G50_S4	X	[mm10]chrX:101717534-101717594	212	AGTACAGTGCTCCTATGCGAAGCAGGCTCCAAGTATTCCACACACACATACATAAATGCACACAACTGCTGGATGGGAATACGAGATTAGTTCTTTAGCG
Ogt_G50_S4	X	[mm10]chrX:101718966-101719026	214	AGTACAGTGCTCCTATGCGAAAGCCCCCTTAAAGTTTCATATAATTCTTAGATTAAGAGGGATATGAGGGCAGCAAGCAGCGCAGATTTACCATTAGTCG
Ogt_G50_S4	X	[mm10]chrX:101719029-101719089	215	AGTACAGTGCTCCTATGCGAAGAACTCCATAACAGCATATAGTCCTAAGGGCTGTGCTGTACTGAGGTCCACCCATGTGGCGCAGATTTACCATTAGTCG
Ogt_G50_S4	X	[mm10]chrX:101719094-101719154	216	AGTACAGTGCTCCTATGCGAGTAACTCGTGGGCTGCATTCCATGACTTCTAAAGCCACTTAGTGTTCTGCTGGTCTGGGTCGCAGATTTACCATTAGTCG
Ogt_G50_S4	X	[mm10]chrX:101719189-101719249	217	AGTACAGTGCTCCTATGCGAGTGGGGAGGGTTCAAATGAAGGGGAAAGGGCATGGATGAGCAGGGAGGGGGAATTGCCTTACGAGATTAGTTCTTTAGCG
Ogt_G50_S4	X	[mm10]chrX:101719252-101719312	218	AGTACAGTGCTCCTATGCGACACCTCGCTACTGCTGCCACCACCACTGTTCTAGCGCTGCTGTCCCAGCAGCCTCTGTTGACGAGATTAGTTCTTTAGCG
Ogt_G50_S4	X	[mm10]chrX:101719315-101719375	219	AGTACAGTGCTCCTATGCGACAAGACACTGCACTGGATGTGCTGAGCTGAGCCAGTGGGGTGGGGTGGGGGGCTGGCTAGACGAGATTAGTTCTTTAGCG
Ogt_G50_S4	X	[mm10]chrX:101719378-101719438	220	AGTACAGTGCTCCTATGCGAGCAAGGGGAGTGCAGGGGAGCTTCCGATGGTGAGAGCTTCGGGAGAGCATTCTCCTCCTAACGAGATTAGTTCTTTAGCG
Ogt_G50_S4	X	[mm10]chrX:101719486-101719546	221	AGTACAGTGCTCCTATGCGATCCCACATGCTCGTTTATTCCTTCTGAATAGGATATTAGATACAGTTTTGGAATAGGTTGCGCAGATTTACCATTAGTCG
Ogt_G50_S4	X	[mm10]chrX:101719615-101719675	223	AGTACAGTGCTCCTATGCGAGGGCTTGGGGTGCTACCCCTATGTGACTGATGGCCACAATTCTCTTATGGGGGGCTGTGGCGCAGATTTACCATTAGTCG
Ogt_G50_S4	X	[mm10]chrX:101719680-101719740	224	AGTACAGTGCTCCTATGCGATTAGAGGGGTATAGTGCTGGGAGCAGGTGAAGCTCCTACTGTCCCTTCTGTGTCCCCAGGCGCAGATTTACCATTAGTCG
Ogt_G50_S4	X	[mm10]chrX:101719773-101719833	225	AGTACAGTGCTCCTATGCGACTCTCATAGTCCACTGCCCAGCCGGGCAGTGGTGGCGCATGCCTTTAATCCCAGCACTTGACGAGATTAGTTCTTTAGCG
Ogt_G50_S4	X	[mm10]chrX:101719840-101719900	226	AGTACAGTGCTCCTATGCGAGAGGCAGGCAGAACTCTCAGAAGAGTTCGAGGCCAGCCTGGTCTACAGAGTGAGTTTCAGACGAGATTAGTTCTTTAGCG
Ogt_G50_S4	X	[mm10]chrX:101719966-101720026	228	AGTACAGTGCTCCTATGCGACCACTGCCTGATACCATTCTTCCTGCATGGCCCTTGGCTTAAGTTTAGAATTTAAGATCCACGAGATTAGTTCTTTAGCG
Ogt_G50_S4	X	[mm10]chrX:101720135-101720195	230	AGTACAGTGCTCCTATGCGATCTCCATCTCAGGAACCTGAGAAGTCAGAAACTCACCATGTTCCCATTTCTTTTTCTAGCCGCAGATTTACCATTAGTCG
Ogt_G50_S4	X	[mm10]chrX:101720198-101720258	231	AGTACAGTGCTCCTATGCGAGTGGGCTTGTCTCTCTGACTATGAATTGCTCTAGCCATGGTTTAAAATTAAAAACAAAACCGCAGATTTACCATTAGTCG
Ogt_G50_S4	X	[mm10]chrX:101720261-101720321	232	AGTACAGTGCTCCTATGCGAACAAACCTCAAGGTATGATGCCACATCTGATAGATCCCAAAAATAGGTAGGATAAGGCAGCGCAGATTTACCATTAGTCG
Ogt_G50_S4	X	[mm10]chrX:101720369-101720429	233	AGTACAGTGCTCCTATGCGAGGCCTATCTCCTAAGAACCGCCCCATTTAAATCAGTAGTGAATGAGCACTAGCCCTTTTTACGAGATTAGTTCTTTAGCG
Ogt_G50_S4	X	[mm10]chrX:101720432-101720492	234	AGTACAGTGCTCCTATGCGATTCAGCACTGTTTGAGGTACGCTGTGAAATATGGGACAGTGATAATGGTTTAATGGAAAAACGAGATTAGTTCTTTAGCG
Ogt_G50_S4	X	[mm10]chrX:101720495-101720555	235	AGTACAGTGCTCCTATGCGAGAGAGATTTGGGTCAGAAGATCTGTTGTCTCTGACCTTTGGGCCAGACACCTCTAAGCCCACGAGATTAGTTCTTTAGCG
Ogt_G50_S4	X	[mm10]chrX:101720558-101720618	236	AGTACAGTGCTCCTATGCGATGTCTTCATCTGCAAGATAGAGATGGGAACAAACAGTACTAACTTCTTGGATGGGTGGCTACGAGATTAGTTCTTTAGCG
Ogt_G50_S4	X	[mm10]chrX:101720666-101720726	237	AGTACAGTGCTCCTATGCGATACCATTGGTGTTCCTCAGTAAAGGTAAAGCTGGGGTCACTCTGTGTCCTGGGAAAGAATCGCAGATTTACCATTAGTCG
Ogt_G50_S4	X	[mm10]chrX:101720729-101720789	238	AGTACAGTGCTCCTATGCGAGGCTTAAGTACAACAGTGGGAAATCACAGTTCACTCCAGGGAATGTTTGAGTTGCACACTCGCAGATTTACCATTAGTCG
Ogt_G50_S4	X	[mm10]chrX:101720792-101720852	239	AGTACAGTGCTCCTATGCGAGGCAGAGTAACCACATTGACTCAGACCTTGAATTGCCAGGCCAATTGGGCAAGGAAAAGCCGCAGATTTACCATTAGTCG
Ogt_G50_S4	X	[mm10]chrX:101720855-101720915	240	AGTACAGTGCTCCTATGCGAAAGGAAAGAAAATTAATCTGGAGGTGAGTGAGTAGTTGGAGTAGACGAAAAAGAGCCTGGCGCAGATTTACCATTAGTCG
Ogt_G50_S4	X	[mm10]chrX:101720963-101721023	241	AGTACAGTGCTCCTATGCGAACTTTGTGTTGCAAAGGAGATACTGGCTGGAAGAGCCCATAGTGTGGAAGTAGCAACCCAACGAGATTAGTTCTTTAGCG
Ogt_G50_S4	X	[mm10]chrX:101721026-101721086	242	AGTACAGTGCTCCTATGCGACCCAGCTGAACACAAGGTAAGGGAAAAATATACTTCAAATGCCTCTGAGGGTTTTGGCCAACGAGATTAGTTCTTTAGCG
Ogt_G50_S4	X	[mm10]chrX:101721152-101721212	244	AGTACAGTGCTCCTATGCGATTGTATTGAATTAACTATAATGAGAACCATCAAAGGAGCGCTCTAGACAAGTGTGGTGATACGAGATTAGTTCTTTAGCG
Ogt_G50_S4	X	[mm10]chrX:101721570-101721630	245	AGTACAGTGCTCCTATGCGACACTCTCTGCTGCTGCGCATGTGTACCGGGACATGTGTTAATTTAAGCAGAATTGGACCACGCAGATTTACCATTAGTCG
Ogt_G50_S4	X	[mm10]chrX:101721633-101721693	246	AGTACAGTGCTCCTATGCGACATCAGTAGTGGTTTATTGGGGATCAAACTGCCAGGCTATCTTTCAGAGGGGCAGAGAGACGCAGATTTACCATTAGTCG
Ogt_G50_S4	X	[mm10]chrX:101721696-101721756	247	AGTACAGTGCTCCTATGCGAAAATTTGTAGAAAAGGAGGCAGATTTTATATGATAGTCAGCAGGGTGGAGATCTTTATGCCGCAGATTTACCATTAGTCG
Ogt_G50_S4	X	[mm10]chrX:101721759-101721819	248	AGTACAGTGCTCCTATGCGATACAGGCTGTTTGGATCAATCAGGAACTAGATGCCTTTGCCCAATAACAATTCTGTTTACCGCAGATTTACCATTAGTCG
Ogt_G50_S4	X	[mm10]chrX:101721867-101721927	249	AGTACAGTGCTCCTATGCGACTGGGGGGGGGGGATGCATTTTAGACTTTACAGACATGAGAGATATGCTTACATGAAGGAACGAGATTAGTTCTTTAGCG
Ogt_G50_S4	X	[mm10]chrX:101721930-101721990	250	AGTACAGTGCTCCTATGCGAGTTTTTGTTTTGTGCTATATGGAACGGGTGGTTATTATAGTAGGGGATTAGCAGAGTGAGACGAGATTAGTTCTTTAGCG
Ogt_G50_S4	X	[mm10]chrX:101721993-101722053	251	AGTACAGTGCTCCTATGCGAGGCTGAAAAATCAGAGAAGGAAGAAAGGATTTTCTGGAAGACATGAGGCTCCTGTTTCTTACGAGATTAGTTCTTTAGCG
Ogt_G50_S4	X	[mm10]chrX:101722056-101722116	252	AGTACAGTGCTCCTATGCGAGAAAGTTAGTACTGAGAACAGCAGTAGGGAGTCACATGTATTGAGGAAAAGAAGATGATAACGAGATTAGTTCTTTAGCG
Ogt_G50_S4	X	[mm10]chrX:101722164-101722224	253	AGTACAGTGCTCCTATGCGATAAAATGGGGCCAATAAAAGTCCAGTCATCCTTCTGTGCCTGCATGGAACTGGTTCTGGTCGCAGATTTACCATTAGTCG
Ogt_G50_S4	X	[mm10]chrX:101722290-101722350	255	AGTACAGTGCTCCTATGCGATCCGCTACACTTCATCCCACCTGTATGCTACTTCCAATGCCCGACAGAGTGGAAACACTACGCAGATTTACCATTAGTCG
Ogt_G50_S4	X	[mm10]chrX:101722353-101722413	256	AGTACAGTGCTCCTATGCGAAGGAAAGAGTGGCAAGGGAAAATCTGTATATATTCAGAGCAGATGCAGTTTTGTGTTCTTCGCAGATTTACCATTAGTCG
Ogt_G50_S4	X	[mm10]chrX:101722461-101722521	257	AGTACAGTGCTCCTATGCGAGGTAACTTTTGATCTGCAGTTTGTTGACTCCATAATGCAGAACTCGTGGATACAAGGCCAACGAGATTAGTTCTTTAGCG
Ogt_G50_S4	X	[mm10]chrX:101722525-101722585	258	AGTACAGTGCTCCTATGCGATACTTACTACCGTAGAATTACTGTTAGGGCTGCAGGATTTCATGTTCATAAAATGCTTAGACGAGATTAGTTCTTTAGCG
Ogt_G50_S4	X	[mm10]chrX:101722588-101722648	259	AGTACAGTGCTCCTATGCGAAGGTCCTAAACAGAGAAAGCCCTTGTTTTTCTGACTATAGATGGCCTTGGGGATTAGGTTACGAGATTAGTTCTTTAGCG
Ogt_G50_S4	X	[mm10]chrX:101722651-101722711	260	AGTACAGTGCTCCTATGCGAGGAAGTTAAGTTGAAATCAGTAGGCACAAGTGCACAGGAAAATGTGACAGGGAGCTACTGACGAGATTAGTTCTTTAGCG
Ogt_G50_S4	X	[mm10]chrX:101722759-101722819	261	AGTACAGTGCTCCTATGCGAAAATCCAGAGGCAGAGGCCTGCTGGCCAGTCCCCTTGATTGTTCACTTTGGTTTTCTTGTCGCAGATTTACCATTAGTCG
Ogt_G50_S4	X	[mm10]chrX:101722822-101722882	262	AGTACAGTGCTCCTATGCGATTTGTTTGTTTGTTTGTCTTGCCATGCTTCCTGCATGCGAGGAAAGCACTCTGTCCCTGCCGCAGATTTACCATTAGTCG
Ogt_G50_S4	X	[mm10]chrX:101722885-101722945	263	AGTACAGTGCTCCTATGCGACTACTATCAGGCAGAGGTCATTTGCTGTTGCTTTTTGATCCAATTTTGTAGTTTCCTGATCGCAGATTTACCATTAGTCG
Ogt_G50_S4	X	[mm10]chrX:101722948-101723008	264	AGTACAGTGCTCCTATGCGAATTTTGCAGAGGGCAGTTCTTATATCCTGAAGGTTCTTCAGTCTTTGGTACCCTTCCTCACGCAGATTTACCATTAGTCG
Ogt_G50_S4	X	[mm10]chrX:101723056-101723116	265	AGTACAGTGCTCCTATGCGATGTGCAGATGTTTGCCAACCTCAGCAGCCTTGCACTTCTCTCCTGACGGCCCCAGACTTGACGAGATTAGTTCTTTAGCG
Ogt_G50_S4	X	[mm10]chrX:101723119-101723179	266	AGTACAGTGCTCCTATGCGACCATGCATCTAAGCACCAAATCCTACATTTGTGTGGCCTCAACAATTTCCTCCCTTGGGTACGAGATTAGTTCTTTAGCG
Ogt_G50_S4	X	[mm10]chrX:101723182-101723242	267	AGTACAGTGCTCCTATGCGAGATTAGTTAACGTAATTAAGTCCTTCCCAGGACTTCAACTAAGCGCCCATTCTTCCCAGAACGAGATTAGTTCTTTAGCG
Ogt_G50_S4	X	[mm10]chrX:101723402-101723462	270	AGTACAGTGCTCCTATGCGACACCACTCCCTGCTTCAACCCCTTCTCTCAAACTCATAACCTCTTTAATTGTTTTTTGTGCGCAGATTTACCATTAGTCG
Ogt_G50_S4	X	[mm10]chrX:101723465-101723525	271	AGTACAGTGCTCCTATGCGAATGTGTATGTGTGTAAAATCTACTGAGTCCATTTAGTGTTGCTCCTATGTCCATGTGTTTCGCAGATTTACCATTAGTCG
Ogt_G50_S4	X	[mm10]chrX:101723532-101723592	272	AGTACAGTGCTCCTATGCGAATCACTGGGAATTGTATAACCTATCAGGGGTTCATCCCTGGAGGAAAAAAACCTGTTTTGCGCAGATTTACCATTAGTCG
Ogt_G50_S4	X	[mm10]chrX:101723625-101723685	273	AGTACAGTGCTCCTATGCGACGGGTAGAGTCTTTTGAAATTTCTTTCATCCATGTTGGCATGTCCTCTTACTTTTCATTAACGAGATTAGTTCTTTAGCG
Ogt_G50_S4	X	[mm10]chrX:101723688-101723748	274	AGTACAGTGCTCCTATGCGAGGAGAAAAATGATCACTCTTATTTTCCGATCTGCTAAGAGTTGTTTTCTAGGGAGATGCCACGAGATTAGTTCTTTAGCG
Ogt_G50_S4	X	[mm10]chrX:101723751-101723811	275	AGTACAGTGCTCCTATGCGAGCAGTTATGAGCTCATAACTTTTTTTTTTTTTTTTTGCTTTTGCAGTGGACCCAGGTGTGACGAGATTAGTTCTTTAGCG
Ogt_G50_S4	X	[mm10]chrX:101723814-101723874	276	AGTACAGTGCTCCTATGCGACCCAGCATGCATATGGCAACTCACAACTGCTTTATAGTTCCAAGCTCCAGGGAACCCAACACGAGATTAGTTCTTTAGCG
Ogt_G50_S4	X	[mm10]chrX:101723995-101724055	278	AGTACAGTGCTCCTATGCGATCATTTTGAGTTGCCAGAGAAAATGGAAATCACTTGGAATAAAAAGATGTTGCAGACTGCCGCAGATTTACCATTAGTCG
Ogt_G50_S4	X	[mm10]chrX:101724058-101724118	279	AGTACAGTGCTCCTATGCGAACTACCAATGAGATACAACAACCAAAGAGGGAGTGCTATGCCAAAACTGGCATTTCTCTGCGCAGATTTACCATTAGTCG
Ogt_G50_S4	X	[mm10]chrX:101724121-101724181	280	AGTACAGTGCTCCTATGCGAGTCTGTGACTCTGCTGGTCATTCCGGGAAAATGGCGACTTAACCTTAGCACCCTGTCTTTCGCAGATTTACCATTAGTCG
Ogt_G50_S4	X	[mm10]chrX:101724229-101724289	281	AGTACAGTGCTCCTATGCGAGAGGGGTTGACTACTAGCTAGAGAGGGCATCTTGACCCTTGGATACTGAGAGAATGGAGAACGAGATTAGTTCTTTAGCG
Ogt_G50_S4	X	[mm10]chrX:101724292-101724352	282	AGTACAGTGCTCCTATGCGATGGTTTTGGCAAGGGAAATGAGCAGGTGGGCCTGGAAAATCATCTCCTATGTTGAGTTCCACGAGATTAGTTCTTTAGCG
Ogt_G50_S4	X	[mm10]chrX:101724355-101724415	283	AGTACAGTGCTCCTATGCGAGGATTGGTGAAGCATCCAATAATGATATCCTCTATGCAACACACAGAAGGCCTGTCCACCACGAGATTAGTTCTTTAGCG
Ogt_G50_S4	X	[mm10]chrX:101724418-101724478	284	AGTACAGTGCTCCTATGCGAAAATGACAGCTCAAAGCAGTGACATAGTCTGCCAGGTAAGTGTAATTTAGCAGGTTTCTTACGAGATTAGTTCTTTAGCG
Ogt_G50_S4	X	[mm10]chrX:101724512-101724572	285	AGTACAGTGCTCCTATGCGACACACATGTTCTGTAAGAGGTATGCCACTAAATAGCAGCTACAACCTTCATTAATTCTCACGCAGATTTACCATTAGTCG
Ogt_G50_S4	X	[mm10]chrX:101724575-101724635	286	AGTACAGTGCTCCTATGCGAATCAAAGGATTTTTGTTTTACTTCTGACATGGTGGCTTGCTATATTGCCCAGGCTGGTCTCGCAGATTTACCATTAGTCG
Ogt_G50_S4	X	[mm10]chrX:101724638-101724698	287	AGTACAGTGCTCCTATGCGAACCCCTGGCTCAAGCAGAGCTCTCATCTCAGCTTCCTGAGTAGCTGGAACTCCATACAAGCGCAGATTTACCATTAGTCG
Ogt_G50_S4	X	[mm10]chrX:101724701-101724761	288	AGTACAGTGCTCCTATGCGACTACCAGCAACCCAGCTTATAATGACCTTAGTTGGTGGAGAGAGTTGAGAGTACAGGTTGCGCAGATTTACCATTAGTCG
Ogt_G50_S4	X	[mm10]chrX:101725112-101725172	289	AGTACAGTGCTCCTATGCGAAAATAGTGTTCTTGTTGTTTTGAGATGGGCTCACTATGTAACTCTGACCTCTAGCTTTAGACGAGATTAGTTCTTTAGCG
Ogt_G50_S4	X	[mm10]chrX:101725175-101725235	290	AGTACAGTGCTCCTATGCGAGTCAAGGGCTGAGATCATAGGTTGAGTATCAGCTTGGATGGATTTTCTAATTCTAAAGTCACGAGATTAGTTCTTTAGCG
Ogt_G50_S4	X	[mm10]chrX:101725238-101725298	291	AGTACAGTGCTCCTATGCGAGAGTTGTTAAGCGTCCAGCTCAGACTGGATGAGATGGCTCAGTGCTACTAAGCCTGCTGAACGAGATTAGTTCTTTAGCG
Ogt_G50_S4	X	[mm10]chrX:101725305-101725365	292	AGTACAGTGCTCCTATGCGATTGATCCCTGGGGCCTGAATATTAGAAGGAAAGAACCGACTCCCATGAAGTTGTCTTCTGACGAGATTAGTTCTTTAGCG
Ogt_G50_S4	X	[mm10]chrX:101725413-101725473	293	AGTACAGTGCTCCTATGCGAATAGAGCCCAGTTCAGATCTCTATCTCACTCCAAGCTTCTGCTGACCAAATCTCATGGTCCGCAGATTTACCATTAGTCG
Ogt_G50_S4	X	[mm10]chrX:101725476-101725536	294	AGTACAGTGCTCCTATGCGAATAGTCCCTGAGCCCACTTTTGTTTATAGAAGGAAGAAACCAATCCTTGTCCAGGTGCACCGCAGATTTACCATTAGTCG
Ogt_G50_S4	X	[mm10]chrX:101725539-101725599	295	AGTACAGTGCTCCTATGCGATAGCAATGCCCCACAAGAAGATGAACATGTTAGAGCTGCTCCCAACCTGACTTCTTAAGGCGCAGATTTACCATTAGTCG
Ogt_G50_S4	X	[mm10]chrX:101725602-101725662	296	AGTACAGTGCTCCTATGCGAAGCTGAAACCCAAACCAGCTTGTCATGGGTGGAACTTTCTCTCTCAGAATCTTGGGAAGGCGCAGATTTACCATTAGTCG
Ogt_G50_S4	X	[mm10]chrX:101725710-101725770	297	AGTACAGTGCTCCTATGCGATGTTTGGTGAAAGTGAAAATCAAGGGGTTTCTGGGCAGCAGATCAGAAGAAAATCTACTTACGAGATTAGTTCTTTAGCG
Ogt_G50_S4	X	[mm10]chrX:101725773-101725833	298	AGTACAGTGCTCCTATGCGATGCTCACGGTTTCCTTTCATTCTTTCAAGATGGAATCCAGGACACCATCCATGATCTATGACGAGATTAGTTCTTTAGCG
Ogt_G50_S4	X	[mm10]chrX:101725836-101725896	299	AGTACAGTGCTCCTATGCGATGCATCGTCCTGGCTGCTTGATGGCATCCAGGATTCTCATGGTGACTCATGGCAATATTAACGAGATTAGTTCTTTAGCG
Ogt_G50_S4	X	[mm10]chrX:101725899-101725959	300	AGTACAGTGCTCCTATGCGATCAAAAATGCAATTCAGTACACCCAGAGCTGCCTAAGGTCATCCATTGCCATAACTATACACGAGATTAGTTCTTTAGCG
Ogt_G50_S4	X	[mm10]chrX:101726383-101726443	302	AGTACAGTGCTCCTATGCGATGTTGAACTGCAGGGGTTTATGGCTGAGAAGCAACTAGTGGCCCCAGAGACAAGTGAACCCGCAGATTTACCATTAGTCG
Ogt_G50_S4	X	[mm10]chrX:101726446-101726506	303	AGTACAGTGCTCCTATGCGAGCTGAGCAGAGAGCAATTGGTCACTGCAGGGCCTAGCTAGAGACAGAGTTGGAGGGACGGCGCAGATTTACCATTAGTCG
Ogt_G50_S4	X	[mm10]chrX:101726509-101726569	304	AGTACAGTGCTCCTATGCGATGGGGCAGAGAGTTGTCAGCAGAAGTGCAGGAAGCCTGCTGGCATTTAAAAAAAAATATTCGCAGATTTACCATTAGTCG
Ogt_G50_S4	X	[mm10]chrX:101726623-101726683	305	AGTACAGTGCTCCTATGCGATTCCAATTACTTTGTCATTTCAGGCTCCAGTAGCTCTTGGTTTGTTTTGGTTTGTTTTTCACGAGATTAGTTCTTTAGCG
Ogt_G50_S4	X	[mm10]chrX:101726689-101726749	306	AGTACAGTGCTCCTATGCGATGGGAATTGAACTGAGGGTTTCATGTGTACCAGGCAAACACTACACTGAATCTCTGCTTGACGAGATTAGTTCTTTAGCG
Ogt_G50_S4	X	[mm10]chrX:101726754-101726814	307	AGTACAGTGCTCCTATGCGATGTCACCAGCCTTTTTCCTGTGGTTTTTGTTTTGTTTGTTTTGTTTTAAGAGGGTCTTAGACGAGATTAGTTCTTTAGCG
Ogt_G50_S4	X	[mm10]chrX:101726818-101726878	308	AGTACAGTGCTCCTATGCGATTTTCCATGTTAGTCTTGAGCTAGCTTTGTAGCTCAGACAGGCTTTGAACTTGCCTCAGCACGAGATTAGTTCTTTAGCG
Ogt_G50_S4	X	[mm10]chrX:101726926-101726986	309	AGTACAGTGCTCCTATGCGATCTGACTTGAGTGAATCTCACTATTTCTGTGTCCTCTTTCTCTATTACCCCCACCTAACCCGCAGATTTACCATTAGTCG
Ogt_G50_S4	X	[mm10]chrX:101726989-101727049	310	AGTACAGTGCTCCTATGCGATCAGGCCTAAATTTAGCAGGCCTGACCCTGCTGATGCCTGGGGCTCCTCAGAACCCACAGCGCAGATTTACCATTAGTCG
Ogt_G50_S4	X	[mm10]chrX:101727052-101727112	311	AGTACAGTGCTCCTATGCGAACAGTTTTGGGCACAAGGTTAAGGAGTTGGAGCTGATGTTGAGGTATCATTATTTATTTACGCAGATTTACCATTAGTCG
Ogt_G50_S4	X	[mm10]chrX:101727115-101727175	312	AGTACAGTGCTCCTATGCGAAGGTATTGAATCTCCTTCCTCAGCAGGGTTGGCCACTATACCAGATATTTGAACACTGAGCGCAGATTTACCATTAGTCG
Ogt_G50_S4	X	[mm10]chrX:101727223-101727283	313	AGTACAGTGCTCCTATGCGATTTTGGAAGAATGGAACCCCCATTGTGCCCCATTTAAGGCCATTTGCTAAATATGTTCAGACGAGATTAGTTCTTTAGCG
Ogt_G50_S4	X	[mm10]chrX:101727286-101727346	314	AGTACAGTGCTCCTATGCGAAATTATAGAGCAGTGTTTAATGGGACAACAGGAATCAGCCATGGGGATGTGGAGAAAAGAACGAGATTAGTTCTTTAGCG
Ogt_G50_S4	X	[mm10]chrX:101727349-101727409	315	AGTACAGTGCTCCTATGCGAAGCAAGGATTATCTTGCCAGTAAATCTTTAAGGAAAATCCTTAAGGTTGTCCCGGAGTATACGAGATTAGTTCTTTAGCG
Ogt_G50_S4	X	[mm10]chrX:101727412-101727472	316	AGTACAGTGCTCCTATGCGATATATGAGCTGACTCCTTTACTGGCAAGAAGTTTAAGAAATCCCTATTTCATGGGGCAGGACGAGATTAGTTCTTTAGCG
Ogt_G50_S4	X	[mm10]chrX:101728106-101728166	317	AGTACAGTGCTCCTATGCGATATTGAGGGTTGTGGATTGGATCCAAGATTGTATTTGTATATTTCTGTGGAAACCAGAGACGCAGATTTACCATTAGTCG
Ogt_G50_S4	X	[mm10]chrX:101728169-101728229	318	AGTACAGTGCTCCTATGCGATGGCCACCAATTGAATGGCTTAGATCTGCATGAATGTCTTATCTTAGAGTTCTGGCAGTCCGCAGATTTACCATTAGTCG
Ogt_G50_S4	X	[mm10]chrX:101728232-101728292	319	AGTACAGTGCTCCTATGCGAAGCCTAGGATGAGTCGTCGAGATAACAATCTCAATCTTGACCTTCCTCTCTGGAGAATGACGCAGATTTACCATTAGTCG
Ogt_G50_S4	X	[mm10]chrX:101728295-101728355	320	AGTACAGTGCTCCTATGCGATCTCTGTCTTTCCCAGCTCCTAGTTCCTCGCACAGCCCCTGCCTGCATGGCTTCTTCAAACGCAGATTTACCATTAGTCG
Ogt_G50_S4	X	[mm10]chrX:101728395-101728455	321	AGTACAGTGCTCCTATGCGATCCTGTGACACTAGGCTCACTTGGTGGCAGTGGTGGCGGTGGCAGATGCTTCCTTCTCCTACGAGATTAGTTCTTTAGCG
Ogt_G50_S4	X	[mm10]chrX:101728458-101728518	322	AGTACAGTGCTCCTATGCGACCTGCTCCCCCTCTCTTCTGCTGCTGCCACCACAGCACACCTGTGTGTGTGTGTGTGTGTACGAGATTAGTTCTTTAGCG
Ogt_G50_S4	X	[mm10]chrX:101728521-101728581	323	AGTACAGTGCTCCTATGCGATGTGTGTGTGTGTGTGTGTGTATTTGGCATATACACGTGGAAGTCAGTGGCTAACCTTGGACGAGATTAGTTCTTTAGCG
Ogt_G50_S4	X	[mm10]chrX:101728584-101728644	324	AGTACAGTGCTCCTATGCGATAATTCCCAGGAGCTGTCCACCTTGGGTTGTTGGTTTTTTTTGTTTTGTTTTGTTTTGTTACGAGATTAGTTCTTTAGCG
Ogt_G50_S4	X	[mm10]chrX:101728678-101728738	325	AGTACAGTGCTCCTATGCGATTCTCATGTGGCTGTAGGTCGTTCCGACTAGGCTAGGTTGGCTAACCAGCACATTACTGTCGCAGATTTACCATTAGTCG
Ogt_G50_S4	X	[mm10]chrX:101728741-101728801	326	AGTACAGTGCTCCTATGCGACTTCCTGTTACCACCTCCCCAGGACTGGGGTTACAAGTACACACTACCATGCTTGTTTTTCGCAGATTTACCATTAGTCG
Ogt_G50_S4	X	[mm10]chrX:101728867-101728927	328	AGTACAGTGCTCCTATGCGAAAATTCAGGTCACTGTGCTTACATGGTTAAGTACTTTACAAATTGAGCCTCTCTTCAGCCCGCAGATTTACCATTAGTCG
Ogt_G50_S4	X	[mm10]chrX:101729023-101729083	330	AGTACAGTGCTCCTATGCGATTGAGGGAGGGGGTATAATTATGTCATAGCACATATGTAGAGATCAGAGGGCAACTTTTGACGAGATTAGTTCTTTAGCG
Ogt_G50_S4	X	[mm10]chrX:101729086-101729146	331	AGTACAGTGCTCCTATGCGAGTCAGGCCTCTTCTACTCTGTGGGCCCCAGGTTGTCAGGCTTGGTGACAAATACTCTTATACGAGATTAGTTCTTTAGCG
Ogt_G50_S4	X	[mm10]chrX:101729149-101729209	332	AGTACAGTGCTCCTATGCGACTGAGGTCACTGGCTTGGTCCTGACCTTGAACTCTTTAGGTAGGCAAGGCAGGCCTTAAAACGAGATTAGTTCTTTAGCG
Ogt_G50_S4	X	[mm10]chrX:101729573-101729633	333	AGTACAGTGCTCCTATGCGATTGAGACAGGGTTTCACTGGGTATCCATGGCTGGTCTGGAAACTGCTAGATAGATGACATCGCAGATTTACCATTAGTCG
Ogt_G50_S4	X	[mm10]chrX:101729636-101729696	334	AGTACAGTGCTCCTATGCGACTTCAGACTTACAGAAATCTTCTAGCTTCTGCCTCCCAAAAGCTGCAATTCAAGTTTGTGCGCAGATTTACCATTAGTCG
Ogt_G50_S4	X	[mm10]chrX:101729699-101729759	335	AGTACAGTGCTCCTATGCGACACCTCACCCTTCTGCTTGCTTAAGACAGGACTTTCCTTATTTAACCCCAGGCTAGTCTACGCAGATTTACCATTAGTCG
Ogt_G50_S4	X	[mm10]chrX:101729762-101729822	336	AGTACAGTGCTCCTATGCGATCCATGGTGTCACCTAGGTTAGCCTCAAATCGTTGATCTTCCTGCCGTATCCTCCCAAGCCGCAGATTTACCATTAGTCG
Ogt_G50_S4	X	[mm10]chrX:101729870-101729930	337	AGTACAGTGCTCCTATGCGATGATCACAAGCTCTAGGAGTCAGAGTATAGGTGTCTTGATGGACCCAGTTTTTGGCCTGCACGAGATTAGTTCTTTAGCG
Ogt_G50_S4	X	[mm10]chrX:101729996-101730056	339	AGTACAGTGCTCCTATGCGAATTTTCCTCTCTTCTTGCTTCTCATGTTGTAGAAGGGTAGTCTAGTCTTTGGAATACTGAACGAGATTAGTTCTTTAGCG
Ogt_G50_S4	X	[mm10]chrX:101730059-101730119	340	AGTACAGTGCTCCTATGCGATAGATAAGGTTGCAGGTATGTATCTATAGGGCAGGGCAAACTTACCCAGCTAACTGCTTCACGAGATTAGTTCTTTAGCG
Ogt_G50_S4	X	[mm10]chrX:101730167-101730227	341	AGTACAGTGCTCCTATGCGACCAGCCTGTCAGGGTGAGTCATGGCATGTTGGTGACTTCATTGGGAGAAAGTGACAGTGCCGCAGATTTACCATTAGTCG
Ogt_G50_S4	X	[mm10]chrX:101730230-101730290	342	AGTACAGTGCTCCTATGCGAGGGTAGCCCTGTCACCTACCCTTCTGGAAAGCACTGGTTATTTTTTCCACTCAGCTTTAGCGCAGATTTACCATTAGTCG
Ogt_G50_S4	X	[mm10]chrX:101730293-101730353	343	AGTACAGTGCTCCTATGCGATTGAAACTGCTCCTTGTTGCCCACTTCTTGCTTTGGTGGCTTCATGCTAATGTCTGCTAGCGCAGATTTACCATTAGTCG
Ogt_G50_S4	X	[mm10]chrX:101730356-101730416	344	AGTACAGTGCTCCTATGCGAAGAAATCATCAGGCCCACCCAGTTGCTGGTGTGGGGTGTGTGTGTGTGTGTGTGTGTGTGCGCAGATTTACCATTAGTCG
Ogt_G50_S4	X	[mm10]chrX:101730464-101730524	345	AGTACAGTGCTCCTATGCGACTCTATTACTTTCTACCTTATTTCTTTGAGACAGGAACCTGGAACTCACCCCCACCCTCAACGAGATTAGTTCTTTAGCG
Ogt_G50_S4	X	[mm10]chrX:101730527-101730587	346	AGTACAGTGCTCCTATGCGATGGCAGCCAGCCAACCCAACTCAACCCTATAGGCAGGCATGGACACACCCAGCTTTTACAACGAGATTAGTTCTTTAGCG
Ogt_G50_S4	X	[mm10]chrX:101730590-101730650	347	AGTACAGTGCTCCTATGCGAGTGCTGGGGGTCTGAACTTGGATTTGGGTCTTCATGTTTGCTCAGCAACTGAACCAGCTCACGAGATTAGTTCTTTAGCG
Ogt_G50_S4	X	[mm10]chrX:101730653-101730713	348	AGTACAGTGCTCCTATGCGAAGCCCCACCTTTTTTTTTTCAAGCCTATTTTCCCTGAATACTACCCAAATAACCAATACAACGAGATTAGTTCTTTAGCG
Ogt_G50_S4	X	[mm10]chrX:101730747-101730807	349	AGTACAGTGCTCCTATGCGATACCCAGACCACAGCTTCATCATCAGCCCTTACCCCTACCCAAACCCTTAACTCTAGCCACGCAGATTTACCATTAGTCG
Ogt_G50_S4	X	[mm10]chrX:101730810-101730870	350	AGTACAGTGCTCCTATGCGAGAGACCATTTTTTTTTGAGAGAGAGAGAGAGAGAGAGAGAGAGAGAGAGAGAGAGAGAGACGCAGATTTACCATTAGTCG
Ogt_G50_S4	X	[mm10]chrX:101730873-101730933	351	AGTACAGTGCTCCTATGCGAAGAAAGAGAGAGAGAGAGAGAGAGTTTCTCACTGTGTAGCCCTGGTGGGCCTGGAACTCACGCAGATTTACCATTAGTCG
Ogt_G50_S4	X	[mm10]chrX:101730940-101731000	352	AGTACAGTGCTCCTATGCGAGAACAGGCTGGCTTTGAACAGAGATCAGCCTGCCTCTGCCTCCCAAATACCGGTATGTACCGCAGATTTACCATTAGTCG
Ogt_G50_S4	X	[mm10]chrX:101731048-101731108	353	AGTACAGTGCTCCTATGCGACTTCAGCCTCTCTGCCTCTGCTACCGCTCTCTCTTCTGCTTAGAAATAAAGAACTCTTCCACGAGATTAGTTCTTTAGCG
Ogt_G50_S4	X	[mm10]chrX:101731111-101731171	354	AGTACAGTGCTCCTATGCGATCTTAGCCTTCGAGATACCACTTGCCCTTTAAGTCTCCAGAAAGCCATTTCAGATAGATCACGAGATTAGTTCTTTAGCG
Ogt_G50_S4	X	[mm10]chrX:101731174-101731234	355	AGTACAGTGCTCCTATGCGACCATCTTGCTGAGCCCAGGACTTAGCGAGTGCTACCCTCTTGCTCTGTAGTATAGATTGCACGAGATTAGTTCTTTAGCG
Ogt_G50_S4	X	[mm10]chrX:101731237-101731297	356	AGTACAGTGCTCCTATGCGAGTATTTGTTCATTTTCACCACACCTTCCCTGTTGGCCTGAGCTGCTGGGATCAGGAAATTACGAGATTAGTTCTTTAGCG
Ogt_G50_S4	X	[mm10]chrX:101731333-101731393	357	AGTACAGTGCTCCTATGCGATAGACAACCAGCTGTTCACTGCCACCACCCAAACCTGAGACTGTATCTAGCAGTTCCACTCGCAGATTTACCATTAGTCG
Ogt_G50_S4	X	[mm10]chrX:101731396-101731456	358	AGTACAGTGCTCCTATGCGACCACAGTGGGTGCAGTAGAGGGCACAGTAGAACCCAGGAGGGCAGAGAGACAAACTCTAACGCAGATTTACCATTAGTCG
Ogt_G50_S4	X	[mm10]chrX:101731459-101731519	359	AGTACAGTGCTCCTATGCGAAGACAGAATGTGGCAGGAAATACACGCCAGAGTCCAGCCAGACCTGGTTCAAAGAATGACCGCAGATTTACCATTAGTCG
Ogt_G50_S4	X	[mm10]chrX:101731522-101731582	360	AGTACAGTGCTCCTATGCGAGAATACGCCCTGGTCCTCATTACCTTGTTTATTGAAAGTTTAAGTGAGGTTTCTAGAAATCGCAGATTTACCATTAGTCG
Ogt_G50_S4	X	[mm10]chrX:101731630-101731690	361	AGTACAGTGCTCCTATGCGACAACGCCTGGCCCTCTGTGCTATTTGCCTCTCCCTCTTCTCACACAGGGATGGCTGAGTTACGAGATTAGTTCTTTAGCG
Ogt_G50_S4	X	[mm10]chrX:101731693-101731753	362	AGTACAGTGCTCCTATGCGACTTGCTAATTTAGTAGGGCGGTGGGGCTCCAGGCAGCTAGTTCTAAAACAGCAAGATAGGACGAGATTAGTTCTTTAGCG
Ogt_G50_S4	X	[mm10]chrX:101731756-101731816	363	AGTACAGTGCTCCTATGCGATGGCAGCTAAGGCACAGTAATGGTGTTGTCCTTGTTGCTGAGATTGATTCTCAGGAGACCACGAGATTAGTTCTTTAGCG
Ogt_G50_S4	X	[mm10]chrX:101731819-101731879	364	AGTACAGTGCTCCTATGCGAATATATGCTGAGCTGTCAGTGCATCCTGGCAGCAAAGTTACGGGTAAGTTCGAGCTAGCCACGAGATTAGTTCTTTAGCG
Ogt_G50_S4	X	[mm10]chrX:101731927-101731987	365	AGTACAGTGCTCCTATGCGAGCAGGCTACAGTTCCAGTCCAGAATTACAAGCCCAGGTAGGAGGCCTCAGTTGTCTCAGACGCAGATTTACCATTAGTCG
Ogt_G50_S4	X	[mm10]chrX:101731990-101732050	366	AGTACAGTGCTCCTATGCGAGGATGATTCTCTCCGTGAAGATGACGGCTGCCGCTGGGGCCCTCTCTGGTCAGAGCGGCCCGCAGATTTACCATTAGTCG
Ogt_G50_S4	X	[mm10]chrX:101732053-101732113	367	AGTACAGTGCTCCTATGCGAGCGCGTGAACAACATCCACATTTGCTCTCTGAACTTCACTCCCACAAAGGCATAGAGCAGCGCAGATTTACCATTAGTCG
Ogt_G50_S4	X	[mm10]chrX:101732116-101732176	368	AGTACAGTGCTCCTATGCGAATTGAGGCAGCAGTGCATGTACCCCATGCCCGAGGTGACTGACTTGGCCACATCCACGTGCGCAGATTTACCATTAGTCG
Ogt_G50_S4	X	[mm10]chrX:101732224-101732284	369	AGTACAGTGCTCCTATGCGAATCCACTAGCACCACCAGGTGATAGGGGGTCCAGCAGACAGCAAAGGCTGCCACCACCACACGAGATTAGTTCTTTAGCG
Ogt_G50_S4	X	[mm10]chrX:101732287-101732347	370	AGTACAGTGCTCCTATGCGACACTAGCCTCATAGCTCGAAAACGCCTCTGGCCTCTGGAGACCAGCAGAACAGCTAGGATACGAGATTAGTTCTTTAGCG
Ogt_G50_S4	X	[mm10]chrX:101732350-101732410	371	AGTACAGTGCTCCTATGCGAGGCATAGCAGTAGGCCATGACCAGAAGGGGCAGCAGGAAACCAGCCACTAGCTGCAGTACACGAGATTAGTTCTTTAGCG
Ogt_G50_S4	X	[mm10]chrX:101732413-101732473	372	AGTACAGTGCTCCTATGCGACAGAGCAGTGCGACCCACCTGTGGGAAGTTGTACTGGCAATGGGTGGCATTGAGGCGCTGACGAGATTAGTTCTTTAGCG
Ogt_G50_S4	X	[mm10]chrX:101732521-101732581	373	AGTACAGTGCTCCTATGCGAACAGAGACCCCATACAACTATGCAGGTGAGGGCTACACGTACCCGGGGGTCCCTGCGGTACGCAGATTTACCATTAGTCG
Ogt_G50_S4	X	[mm10]chrX:101732584-101732644	374	AGTACAGTGCTCCTATGCGACTGGGTGGCGTGCACTATGCTCAGATATCTGTCGAAGCTTATACAAGCCAGCAGGAAGGCCGCAGATTTACCATTAGTCG
Ogt_G50_S4	X	[mm10]chrX:101732647-101732707	375	AGTACAGTGCTCCTATGCGATGCATAGAAGTTGATGTTGAACAAGGCGCCTGCCACTTTGCAGAGGCCAGGGCCGAAAACCGCAGATTTACCATTAGTCG
Ogt_G50_S4	X	[mm10]chrX:101732710-101732770	376	AGTACAGTGCTCCTATGCGACTGGACAGCAGCATCCACTGCCCACAATGGAAGAGTTAACACCAGCAGAACATCGGCTACCGCAGATTTACCATTAGTCG
Ogt_G50_S4	X	[mm10]chrX:101732818-101732878	377	AGTACAGTGCTCCTATGCGAACTCAGTAGCACAGCAGCCACCGCCCCATTGCCTAGCAGCCCCAGCAAGAAGAGGAGGCTACGAGATTAGTTCTTTAGCG
Ogt_G50_S4	X	[mm10]chrX:101732881-101732941	378	AGTACAGTGCTCCTATGCGAGAGGGCTGGCAGGAAGGTTCTGTCAAAGTTCAGGCTGAAATCCTGTGGGCAGGGCGGGGAACGAGATTAGTTCTTTAGCG
Ogt_G50_S4	X	[mm10]chrX:101732944-101733004	379	AGTACAGTGCTCCTATGCGAAGAGAAGTCGCTCTCGTTTTCCCCATAATCGTAGGGAGAGGTGCTGTTTTCCAGAAGAAAACGAGATTAGTTCTTTAGCG
Ogt_G50_S4	X	[mm10]chrX:101733007-101733067	380	AGTACAGTGCTCCTATGCGAAAAGTCCGAGGCATCTAGCACTTGACGTTCACTAACCTGCCCGAGGAAGGGGGAGAGAGGACGAGATTAGTTCTTTAGCG
Ogt_G50_S4	X	[mm10]chrX:101733115-101733175	381	AGTACAGTGCTCCTATGCGATGTGCCCTGTCATTTATTCTGGTGAGTGTTTGTTTCCCTTAGCAATAGCCAGACCCTGAGCGCAGATTTACCATTAGTCG
Ogt_G50_S4	X	[mm10]chrX:101733178-101733238	382	AGTACAGTGCTCCTATGCGAACTCTTTCTCTCCGGGGACCACATCTCCTTAACTCCATCTACTCAGACTGGGAAGGTGACCGCAGATTTACCATTAGTCG
Ogt_G50_S4	X	[mm10]chrX:101733241-101733301	383	AGTACAGTGCTCCTATGCGACCCTTTTCAAAGGCTGGTAACCCCCCGGCCCCCCCCCCCCCAGACCCTTTCTGGATTATCCGCAGATTTACCATTAGTCG
Ogt_G50_S4	X	[mm10]chrX:101733304-101733364	384	AGTACAGTGCTCCTATGCGACAGGACAGGGATTCTCTGCCGGAAGAGGAACTTCCTTCCAGGGTCTGGAGCCTTCCATTCCGCAGATTTACCATTAGTCG
Ogt_G50_S4	X	[mm10]chrX:101733412-101733472	385	AGTACAGTGCTCCTATGCGACCACCCCTGCCTGGATCAACCACTGGCCTCCCCAGGTGCTTCCTTACTCTATCTTCTAGTACGAGATTAGTTCTTTAGCG
Ogt_G50_S4	X	[mm10]chrX:101733475-101733535	386	AGTACAGTGCTCCTATGCGATGGCCCTCCTTTTCCCTCCTCAGCCCTTATCTGGTGACCCTGACTTCCTGGTCTCACATAACGAGATTAGTTCTTTAGCG
Ogt_G50_S4	X	[mm10]chrX:101733538-101733598	387	AGTACAGTGCTCCTATGCGAATTTTCTACAAACCACTGTGCACCCCTACACACACCGTACATGCCTCTCTTCCCCTACCCACGAGATTAGTTCTTTAGCG
Ogt_G50_S4	X	[mm10]chrX:101733601-101733661	388	AGTACAGTGCTCCTATGCGAGGCAGTGGGTACCCACTGAGCTTCCCACCCAAGCCCTAATTGGTCTTCCCAAGATGGCCAACGAGATTAGTTCTTTAGCG
Ogt_G50_S4	X	[mm10]chrX:101733709-101733769	389	AGTACAGTGCTCCTATGCGACCAAGTAGCTCAGACAATGGGGGCATACCACTTCCACTTCAGCTCTACACCTTATCCCAACGCAGATTTACCATTAGTCG
Ogt_G50_S4	X	[mm10]chrX:101733772-101733832	390	AGTACAGTGCTCCTATGCGAATCTGAGAACTAGAGATCACCGAAGTTGAGTTTCTACAGCTTGACATTTTCAGATGAGGCCGCAGATTTACCATTAGTCG
Ogt_G50_S4	X	[mm10]chrX:101733835-101733895	391	AGTACAGTGCTCCTATGCGACAAGCCACAGAGGCAGGAGACAGGCCTGTGGTTAGTGGCCAGGCTGGGTTTCCCAATCCACGCAGATTTACCATTAGTCG
Ogt_G50_S4	X	[mm10]chrX:101733898-101733958	392	AGTACAGTGCTCCTATGCGAATGCTCTTATTATCAGAACCTCTGCATTCGATGCTGCTCACTCAGCCCGCTGGTGCCTCTCGCAGATTTACCATTAGTCG
Ogt_G50_S4	X	[mm10]chrX:101734006-101734066	393	AGTACAGTGCTCCTATGCGATTGGCCGCTGTATTGTAGCTGAGCTGGGCAGCAGAACTTACCTCAAGGTACATGGCTTGGACGAGATTAGTTCTTTAGCG
Ogt_G50_S4	X	[mm10]chrX:101734069-101734129	394	AGTACAGTGCTCCTATGCGAGTGCTCCGGCTGTGGCTGCTGGGGTCAGGTCTCGTGCTGCCTGCTTCTCTGCCTTTGGCAACGAGATTAGTTCTTTAGCG
Ogt_G50_S4	X	[mm10]chrX:101734132-101734192	395	AGTACAGTGCTCCTATGCGAGTGGTTGGGAACTTGCAGTGAACAGAGGAAGTGAAGATTTCACGGCTCAGCACAGCCTCTACGAGATTAGTTCTTTAGCG
Ogt_G50_S4	X	[mm10]chrX:101734195-101734255	396	AGTACAGTGCTCCTATGCGAAAAGGGTAATCTATACCAGCCCTCCGCAGAGGGCTTTTCTGTCTTTTCTGCCACGCCTGTACGAGATTAGTTCTTTAGCG
Ogt_G50_S4	X	[mm10]chrX:101734304-101734364	397	AGTACAGTGCTCCTATGCGAACAAAGCCTGCAGTTCTTGTCTTACTCAATATCATTCATAAACAACTAAGTGAGTCTAGGCGCAGATTTACCATTAGTCG
Ogt_G50_S4	X	[mm10]chrX:101734367-101734427	398	AGTACAGTGCTCCTATGCGAAGGCAGGAAGTGTGATCTGATGGCAGTGACTGCAGGAGGGAAGCTCAACTGAAGGGACCTCGCAGATTTACCATTAGTCG
Ogt_G50_S4	X	[mm10]chrX:101734430-101734490	399	AGTACAGTGCTCCTATGCGACCTTAGCAAGTACTGGGATTGGAGTCTCACTGGGACTGTGTTAGAGTGGGCTGTGGTGTGCGCAGATTTACCATTAGTCG
Ogt_G50_S4	X	[mm10]chrX:101734493-101734553	400	AGTACAGTGCTCCTATGCGAACTGCTATCATAACTGCATGAGTAGGGAGGACATTTCCAAGAGATGCCTGCCACCTCTTGCGCAGATTTACCATTAGTCG
Ogt_G50_S4	X	[mm10]chrX:101734664-101734724	402	AGTACAGTGCTCCTATGCGAAGTCATCTGGAATGTCCATTTAATGTCCAGATCAGATGGAACTATTCAGGAGCACGCTCAACGAGATTAGTTCTTTAGCG
Ogt_G50_S4	X	[mm10]chrX:101734727-101734787	403	AGTACAGTGCTCCTATGCGAGCTGGGAAATGCTTGATACCTCAGTGATCGGCAGGTGGGCATGTGTGGCGCAGACAAGCAACGAGATTAGTTCTTTAGCG
Ogt_G50_S4	X	[mm10]chrX:101734790-101734850	404	AGTACAGTGCTCCTATGCGACAGCTGATAGGGCAACAGGCTATCAGGAATGTTGGAGTTCCATCTGGTGAGAAAGCAAAAACGAGATTAGTTCTTTAGCG
Ogt_G50_S4	X	[mm10]chrX:101734886-101734946	405	AGTACAGTGCTCCTATGCGATGGGGGAAGGTTCTTTGAGGAAAGGTCTGAAGCCACACAGTGGGGAAGTAGAGGGCAGCCCGCAGATTTACCATTAGTCG
Ogt_G50_S4	X	[mm10]chrX:101734949-101735009	406	AGTACAGTGCTCCTATGCGATTACCAGGTGCACGGACTGCTTCTGAATCACACCTAGACTGTGTGCTGGTCTGTCCCAGGCGCAGATTTACCATTAGTCG
Ogt_G50_S4	X	[mm10]chrX:101735012-101735072	407	AGTACAGTGCTCCTATGCGAGTGCCTGCTTTTACAGACCCATCTCAAAGTCGGTGGTCTGAAAAGGACGCCAGCACTCTTCGCAGATTTACCATTAGTCG
Ogt_G50_S4	X	[mm10]chrX:101735075-101735135	408	AGTACAGTGCTCCTATGCGAATTGGGTTTGGGTTCTTTCTGAGATAGCCTCATTCTGTAGCCCAACCTGGCTTTGAACTCCGCAGATTTACCATTAGTCG
Ogt_G50_S4	X	[mm10]chrX:101735183-101735243	409	AGTACAGTGCTCCTATGCGATTGGAGTGCACCATTGTGAACAGCATGTGGCAGGAGGGTGGGGCAGTCCACTCTCTTGTAACGAGATTAGTTCTTTAGCG
Ogt_G50_S4	X	[mm10]chrX:101735246-101735306	410	AGTACAGTGCTCCTATGCGAAGACAAACTGATGTATTCATCCAGCTAAACACAAGTGGAGAGCCACATATTTTTCATGAGACGAGATTAGTTCTTTAGCG
Ogt_G50_S4	X	[mm10]chrX:101735309-101735369	411	AGTACAGTGCTCCTATGCGAGAATGCAGAGGAGCTTATGCCCATGTGGTAGAAGAGGCAAGTAACAGACTATTGTATGTAACGAGATTAGTTCTTTAGCG
Ogt_G50_S4	X	[mm10]chrX:101735372-101735432	412	AGTACAGTGCTCCTATGCGATGGTACTACCCATGCACATGTAGAAAGTGCCATACTAGGCTACAGTATGCATGCATCAGTACGAGATTAGTTCTTTAGCG
Ogt_G50_S4	X	[mm10]chrX:101735478-101735538	413	AGTACAGTGCTCCTATGCGACTTACTATGTGACACTGGCTGGACTAGAACTCCACAGACTGGCCTCAAGCTCAGGGGCCTCGCAGATTTACCATTAGTCG
Ogt_G50_S4	X	[mm10]chrX:101735541-101735601	414	AGTACAGTGCTCCTATGCGATCCTGGCTGCTGGGATTAAAGTTGTGGGCCATCGTGTTTATCCTAAATGCAATTTTCTTTCGCAGATTTACCATTAGTCG
Ogt_G50_S4	X	[mm10]chrX:101735604-101735664	415	AGTACAGTGCTCCTATGCGAAAACAAGAACTTGCTATATAGCCCAGGCTAGCTTTGAGTTCATGCTCCTCTTGCCATAGCCGCAGATTTACCATTAGTCG
Ogt_G50_S4	X	[mm10]chrX:101735667-101735727	416	AGTACAGTGCTCCTATGCGATGGAGAACTGAGATTACAGTTATGAGCCACCACATCGTGCTGATGCTCAGTTTTCAAACACGCAGATTTACCATTAGTCG
Ogt_G50_S4	X	[mm10]chrX:101735775-101735835	417	AGTACAGTGCTCCTATGCGACTGCCCAAACTTAGCGCTCGTCTCTTCCTATGGACAGGTGGGACACTTCTCTGAAACAACACGAGATTAGTTCTTTAGCG
Ogt_G50_S4	X	[mm10]chrX:101735838-101735898	418	AGTACAGTGCTCCTATGCGACACCTGCAGGGCTCAGGTGAAAAGGACCCGAGGTCTTAGACGAGGTCAGGAGCTGTGTGTACGAGATTAGTTCTTTAGCG
Ogt_G50_S4	X	[mm10]chrX:101735901-101735961	419	AGTACAGTGCTCCTATGCGAGAGGGGACTAAGGATTCCTGAGGGCCCGCCAGTCAGGATGTAGATGACTTGGCACTTGACACGAGATTAGTTCTTTAGCG
Ogt_G50_S4	X	[mm10]chrX:101735964-101736024	420	AGTACAGTGCTCCTATGCGACTATAGAGACAGAGATGACAGAAGCCTGGAAAACACGACAAAATTGCTTTAGTGCCCACAACGAGATTAGTTCTTTAGCG
Ogt_G50_S4	X	[mm10]chrX:101736071-101736131	421	AGTACAGTGCTCCTATGCGAAAATAACTGTAAAGGCTATGCCCACACTTGTTCATGTTCAAGGATGCAGTCTGCCATTGTCGCAGATTTACCATTAGTCG
Ogt_G50_S4	X	[mm10]chrX:101736134-101736194	422	AGTACAGTGCTCCTATGCGACCGCATCCCATTTTTTGGCTTTAAAGGGAACTTTTGCTTTATGAAAGAAAAGGTAGTGAACGCAGATTTACCATTAGTCG
Ogt_G50_S4	X	[mm10]chrX:101736197-101736257	423	AGTACAGTGCTCCTATGCGAAGATGGTCATTTTAGAAATGCCTCATGGTGGCAGAAGCCAGCCCCTCAGTGTGCCTCTTCCGCAGATTTACCATTAGTCG
Ogt_G50_S4	X	[mm10]chrX:101736260-101736320	424	AGTACAGTGCTCCTATGCGAGTGGCTGCTGAAACATTACTGATCTATATGAAGTGTAAAGGTCTAGGGTCCCCTAATCTCCGCAGATTTACCATTAGTCG
Ogt_G50_S4	X	[mm10]chrX:101736368-101736428	425	AGTACAGTGCTCCTATGCGACCAGGTTGCAGGGAGGGATGCTGGACTGAAGGTCATGTGTAGAGAAGCCTTCCTTTCTGAACGAGATTAGTTCTTTAGCG
Ogt_G50_S4	X	[mm10]chrX:101736431-101736491	426	AGTACAGTGCTCCTATGCGACTGGCAGCCAGATGTTAGCATTAGGCCCCGATAGACCAGGTGGCTCTCTTGGTTTGCTTGACGAGATTAGTTCTTTAGCG
Ogt_G50_S4	X	[mm10]chrX:101736494-101736554	427	AGTACAGTGCTCCTATGCGAGACTTGTATATCTGTCTTGGGGGTGGCAGAGCACCGACCTTGTCTGGACTCCAGGCCTAGACGAGATTAGTTCTTTAGCG
Ogt_G50_S4	X	[mm10]chrX:101736557-101736617	428	AGTACAGTGCTCCTATGCGACACCCTACGAGCCCTCTGAGATCTTGGACAGATCAGAACCATAAGCAGGCAGTTCCCTCAACGAGATTAGTTCTTTAGCG
Ogt_G50_S4	X	[mm10]chrX:101736665-101736725	429	AGTACAGTGCTCCTATGCGAAGCACGGGGGCCAAGGGCTTCGCACAGGTGCAGCCGAGGGCCGGAAGTAAGTAAATGCAGCGCAGATTTACCATTAGTCG
Ogt_G50_S4	X	[mm10]chrX:101736728-101736788	430	AGTACAGTGCTCCTATGCGACCAGAACCAGGACTACCTAGAACTTTCCATGCCAAGAGAGCCCATGATAGAGAGTAGTGGCGCAGATTTACCATTAGTCG
Ogt_G50_S4	X	[mm10]chrX:101736791-101736851	431	AGTACAGTGCTCCTATGCGAATGGGACCTGTAAGTGTGGCTGTGGCCAGGGCCAGTGGGCTAGTCCTCCATGAAAGTGGTCGCAGATTTACCATTAGTCG
Ogt_G50_S4	X	[mm10]chrX:101736854-101736914	432	AGTACAGTGCTCCTATGCGATCTCTGGCCTCAATTGATAGAGCAGGCTCTGCCAGTTCTAGCTAAATTCCTTGGCTGTCCCGCAGATTTACCATTAGTCG
Ogt_G50_S4	X	[mm10]chrX:101736962-101737022	433	AGTACAGTGCTCCTATGCGAATCTGAAGAGTGGCTCTAAAGGATAGCATGCATTTGATGGGACTGCTTTATGGACTGTGCACGAGATTAGTTCTTTAGCG
Ogt_G50_S4	X	[mm10]chrX:101737025-101737085	434	AGTACAGTGCTCCTATGCGAATATGCGTGGCAAGTCTGTGGCAAAGATGGGTGCCCAGTTAGTGGCTTGCTCCTCCTCTTACGAGATTAGTTCTTTAGCG
Ogt_G50_S4	X	[mm10]chrX:101737088-101737148	435	AGTACAGTGCTCCTATGCGAGGACCAACCCAACTCCCAAGTCTCAAAATTGCAGTGCTGGGCTTCAGCTGCTGTTTGCAGACGAGATTAGTTCTTTAGCG
Ogt_G50_S4	X	[mm10]chrX:101737151-101737211	436	AGTACAGTGCTCCTATGCGAAGATACCTTGGAAGGTTCCTGGGTCACAGAGCTGAGCCAACCCCTCACCTGGCCTTCTAAACGAGATTAGTTCTTTAGCG
Ogt_G50_S4	X	[mm10]chrX:101737259-101737319	437	AGTACAGTGCTCCTATGCGAAAAAGCTCACAGCCTGTGTTCTGGTCTCTGGGCCCTCCCTGCTCTGCAGCAGAGAGGGCTCGCAGATTTACCATTAGTCG
Ogt_G50_S4	X	[mm10]chrX:101737322-101737382	438	AGTACAGTGCTCCTATGCGAGAGGAAGTTAGTCAGAGTGAAGCTGCCTGGGGCCTCATCAGTGGTCAAGGTGTGAAATGTCGCAGATTTACCATTAGTCG
Ogt_G50_S4	X	[mm10]chrX:101737385-101737445	439	AGTACAGTGCTCCTATGCGACCTGGCTCTTCTCTGCCTCCCCTCCCCCTGTTGTTTTTCATTCTTTCACACCTCTGAGCTCGCAGATTTACCATTAGTCG
Ogt_G50_S4	X	[mm10]chrX:101737448-101737508	440	AGTACAGTGCTCCTATGCGAGTTTGGGGAGACAGGAGGCTGGGAGATAGACACCTTTGTGCCCAGACCCTCACAGGAAGGCGCAGATTTACCATTAGTCG
Ogt_G50_S4	X	[mm10]chrX:101737556-101737616	441	AGTACAGTGCTCCTATGCGATCTGCTTCACAGCCACACAATAGCCTCCCTAGTCATGTTTCCAAAAGCTCCCTAACTCAGACGAGATTAGTTCTTTAGCG
Ogt_G50_S4	X	[mm10]chrX:101737619-101737679	442	AGTACAGTGCTCCTATGCGATCAGCCCCAGGCTGCCTTAAAAGTCTGCCTAGACAAGACTGAGTCATGAAATGAGGTGTCACGAGATTAGTTCTTTAGCG
Ogt_G50_S4	X	[mm10]chrX:101737682-101737742	443	AGTACAGTGCTCCTATGCGATCTCTGGGCATCTTCCTTCCACACTCCTAAGTCTTGAGGCTTTCTCCCCTTGGCCCCAGAACGAGATTAGTTCTTTAGCG
Ogt_G50_S4	X	[mm10]chrX:101737745-101737805	444	AGTACAGTGCTCCTATGCGACCCAAGGGAAGGAGCACTCAAGTTACAAGAAGACCCAGGGACGGGGAGACCGAGGCACAGACGAGATTAGTTCTTTAGCG
Ogt_G50_S4	X	[mm10]chrX:101737839-101737899	445	AGTACAGTGCTCCTATGCGAATAATATGGCTTCTCAGCCTTCGGGGAGTCAACCCTTTCAAAGTGTGCTAGGGCCGAGGGCGCAGATTTACCATTAGTCG
Ogt_G50_S4	X	[mm10]chrX:101737902-101737962	446	AGTACAGTGCTCCTATGCGAGAGTGGGTCAGGCATATTTTTGGCAGTTGTGCCAAGGCTGCTTCTATCTTGGGAGCTGGGCGCAGATTTACCATTAGTCG
Ogt_G50_S4	X	[mm10]chrX:101737965-101738025	447	AGTACAGTGCTCCTATGCGAGCCCCAGCAGGGTGATAAGAACACCTTCTTTTTATTGTTATTTATTTTTTTAACCTCAGGCGCAGATTTACCATTAGTCG
Ogt_G50_S4	X	[mm10]chrX:101738028-101738088	448	AGTACAGTGCTCCTATGCGATGTTCTAAGTGGCTCGATGTTGCTATTGTGTTAGGTTTGACATAAAGTCCATGCTGCCCACGCAGATTTACCATTAGTCG
Ogt_G50_S4	X	[mm10]chrX:101738136-101738196	449	AGTACAGTGCTCCTATGCGAGCTAATGTCTGTCTGTCTGGACTCAGACAGAGTAAATGGAAGGCTTGCTGACAGACAGACACGAGATTAGTTCTTTAGCG
Ogt_G50_S4	X	[mm10]chrX:101738199-101738259	450	AGTACAGTGCTCCTATGCGAGGCTCACAGTCAGCATTCCTCCCAAACCTGTGTCTGTTGTCAGGAGGAGCCACTAATTCCACGAGATTAGTTCTTTAGCG
Ogt_G50_S4	X	[mm10]chrX:101738262-101738322	451	AGTACAGTGCTCCTATGCGACCTCTGGCAACCTCTGCAAATGGGGCATCTGCTTCCCTGTAGCACATACGTGTAACACACACGAGATTAGTTCTTTAGCG
Ogt_G50_S4	X	[mm10]chrX:101738325-101738385	452	AGTACAGTGCTCCTATGCGAAAAGTTCGTTGATCCTCACCTCCCCCGCCCACTTCCCTAACCCTCCAGGTGGTTCTGGCTACGAGATTAGTTCTTTAGCG
Ogt_G50_S4	X	[mm10]chrX:101738433-101738493	453	AGTACAGTGCTCCTATGCGATTTCTCTACCCTTTTGCTGTCCCTCTTGCTGTCCCCGAGAGGTAGCCATAGCAGCTTTGGCGCAGATTTACCATTAGTCG
Ogt_G50_S4	X	[mm10]chrX:101738496-101738556	454	AGTACAGTGCTCCTATGCGACTCCTAAAAGCCTTTGGCTATTCTCTGCACCCTCCCACAAGAGGGAGCCATGGCAATTTTCGCAGATTTACCATTAGTCG
Ogt_G50_S4	X	[mm10]chrX:101738559-101738619	455	AGTACAGTGCTCCTATGCGACTTTTCCTAAATAAACTTTTCTTTTTCCCACCCATGATGGAGTGGTTGAGTTCGGTGGTTCGCAGATTTACCATTAGTCG
Ogt_G50_S4	X	[mm10]chrX:101738622-101738682	456	AGTACAGTGCTCCTATGCGACTGTGCCCTTGTTTACAACCACTGAGCTGGCCCAAGGCATATGCTTTCCCCAAACCATAGCGCAGATTTACCATTAGTCG
Ogt_G50_S4	X	[mm10]chrX:101738730-101738790	457	AGTACAGTGCTCCTATGCGAACTCATTTTCATGTCTTCTCAAACTTCCCTGTCTTTCTTTCTATCCTGCCTCACTTGAACACGAGATTAGTTCTTTAGCG
Ogt_G50_S4	X	[mm10]chrX:101738793-101738853	458	AGTACAGTGCTCCTATGCGACTGAACTGCTGGAAAATAACTCAGTTAGTCAAAACTAATTTTCTACAATCCCAGCAGAGCACGAGATTAGTTCTTTAGCG
Ogt_G50_S4	X	[mm10]chrX:101738856-101738916	459	AGTACAGTGCTCCTATGCGAGTATTAGCTTTGGGGACCCTGTGCATGGTGCTGTGGCACTAGCTCTGCCTCTTATTACATACGAGATTAGTTCTTTAGCG
Ogt_G50_S4	X	[mm10]chrX:101738919-101738979	460	AGTACAGTGCTCCTATGCGAAGCTCCGATTTCTCCATCTAGGCAGGAATCCATCTGCATAAGGCACAGGCAGCAGGGCTCACGAGATTAGTTCTTTAGCG
Ogt_G50_S4	X	[mm10]chrX:101739027-101739087	461	AGTACAGTGCTCCTATGCGAAGTAAGTCCCTGAATAGTGAGTCAGGCTGAATTGTGTTATTGGCGCTGCCATTTACTAGTCGCAGATTTACCATTAGTCG
Ogt_G50_S4	X	[mm10]chrX:101739090-101739150	462	AGTACAGTGCTCCTATGCGACCCACCACGTGTAGTTTATTTCATCTCCCTGTGTCTTATTTTTCCCCTCTGGGTCAGAAGCGCAGATTTACCATTAGTCG
Ogt_G50_S4	X	[mm10]chrX:101739153-101739213	463	AGTACAGTGCTCCTATGCGAAAACTATACTGTCTGTCTATTAGAAGGCACTCAGACCATTTGCCAGGCTTCTCAGTGGTGCGCAGATTTACCATTAGTCG
Ogt_G50_S4	X	[mm10]chrX:101739216-101739276	464	AGTACAGTGCTCCTATGCGAGCAGCTCAGCTTCCTACCACTGCTGAACACACCCAGGGAAACAGCTTCATTTGCCTTGAGCGCAGATTTACCATTAGTCG
Ogt_G50_S4	X	[mm10]chrX:101739324-101739384	465	AGTACAGTGCTCCTATGCGAATTGTAATGGCCTTTGGCCTTGGGGCCTGAGTGCCATCTTGAATTTCCATATCTAAATTTACGAGATTAGTTCTTTAGCG
Ogt_G50_S4	X	[mm10]chrX:101739387-101739447	466	AGTACAGTGCTCCTATGCGAGGTATAGGGGTGGGTGGCCTCTCCATCTAGGGTACCTGACAGATGGTCAACTAGATCCAGACGAGATTAGTTCTTTAGCG
Ogt_G50_S4	X	[mm10]chrX:101739450-101739510	467	AGTACAGTGCTCCTATGCGAACAGTAAAGGCAGAGTCCAGACAGAAAGCCCAGGACCTCAAATCTAGACAAAGAACTGGCACGAGATTAGTTCTTTAGCG
Ogt_G50_S4	X	[mm10]chrX:101739513-101739573	468	AGTACAGTGCTCCTATGCGATAAGGGAATACTAAGTATGGGAGAAATCAGAGAATACCAAACCAATTGGGTATCCAATACACGAGATTAGTTCTTTAGCG
Ogt_G300_S4	X	[mm10]chrX:101654346-101654406	2	CGATTAGTAGGAAGCTGCCGCATTTTTTTTCCTTTTTCTTCTTTGTTTGGATTGCAGCATTCTGCTCTTCTGATGATGCGACGAGATTAGTTCTTTAGCG
Ogt_G300_S4	X	[mm10]chrX:101654409-101654469	3	CGATTAGTAGGAAGCTGCCGTGACCCTGCAGTAGCGCAAAGGCTGCGCAGCGTTAATGCGCATTGCGTGCGAATGAGCCCACGAGATTAGTTCTTTAGCG
Ogt_G300_S4	X	[mm10]chrX:101654472-101654532	4	CGATTAGTAGGAAGCTGCCGTGAACGGTTGACTAGATGAGTAATCTGATTGACTGGCTCTCACAGTCCTATTCTGTAGCCACGAGATTAGTTCTTTAGCG
Ogt_G300_S4	X	[mm10]chrX:101654830-101654890	5	CGATTAGTAGGAAGCTGCCGCCTAAGTGATAACGACGGACTTGGCAGACACATTTTTGTATGGCTCAGTAGCTTGCTTTTCGCAGATTTACCATTAGTCG
Ogt_G300_S4	X	[mm10]chrX:101654893-101654953	6	CGATTAGTAGGAAGCTGCCGCATAAGAATGTGAGCAGCAGGTCCTCAGCTTTTTGTTTTTCTAACAGAATGCATGGTGAGCGCAGATTTACCATTAGTCG
Ogt_G300_S4	X	[mm10]chrX:101654956-101655016	7	CGATTAGTAGGAAGCTGCCGTGAAGGCTTGGGGAGGTTGTATAGGAAAGCACCTTTGTGCAGCACTGTGTAGCTGAGGATCGCAGATTTACCATTAGTCG
Ogt_G300_S4	X	[mm10]chrX:101655019-101655079	8	CGATTAGTAGGAAGCTGCCGCCCGGACTTAACGCTCATCCTGCCTCCACCACCTTAGTGCCTGTCCCCCACGCCCAGTTGCGCAGATTTACCATTAGTCG
Ogt_G300_S4	X	[mm10]chrX:101655372-101655432	9	CGATTAGTAGGAAGCTGCCGTTGGCAGAACTGAACATGGTGGTTTGCACTTGGGTTCTGGTGGCGCAGGCGCAGGAGCAGACGAGATTAGTTCTTTAGCG
Ogt_G300_S4	X	[mm10]chrX:101655435-101655495	10	CGATTAGTAGGAAGCTGCCGGCTGTGGCAGCGCATTAGTTTTGGCGCAAGCGAGCCTATGCTGCAGGGTCACTTTTGGCTACGAGATTAGTTCTTTAGCG
Ogt_G300_S4	X	[mm10]chrX:101655498-101655558	11	CGATTAGTAGGAAGCTGCCGCAGAGAAGAAATAATGATATCATCTTCTTCCCCCTCCCCAATCTTTTTTTTTTTTCCCCTACGAGATTAGTTCTTTAGCG
Ogt_G300_S4	X	[mm10]chrX:101655561-101655621	12	CGATTAGTAGGAAGCTGCCGCAAATTTTCCCCTTTCCCCTTATCTCCTTCCCCTCTCGTCTTCTTTCATTAAACCCTCCTACGAGATTAGTTCTTTAGCG
Ogt_G300_S4	X	[mm10]chrX:101655928-101655988	13	CGATTAGTAGGAAGCTGCCGTTGAAAATATTGTAGTTTGGTGTTTTTGAGAGAAGGTCTCACTCTGTATGGAATGGCTTGCGCAGATTTACCATTAGTCG
Ogt_G300_S4	X	[mm10]chrX:101655991-101656051	14	CGATTAGTAGGAAGCTGCCGCTTCCTGTGTGGCTCAGGTTGGCCCTCAGCCTAGTGACAATCATCTTCAGCTTCTGAGCGCGCAGATTTACCATTAGTCG
Ogt_G300_S4	X	[mm10]chrX:101656054-101656114	15	CGATTAGTAGGAAGCTGCCGAGATTACAGACATGAATGAACTGCCCCTATCTGGTTTTAAAATGCCATTTCCCCTAAAAGCGCAGATTTACCATTAGTCG
Ogt_G300_S4	X	[mm10]chrX:101656117-101656177	16	CGATTAGTAGGAAGCTGCCGTAGGTATGTCTTCAGCGTGAAGCAGTGCTTAGGGGCTGTAGAGGGATCCATTGTGAAGAACGCAGATTTACCATTAGTCG
Ogt_G300_S4	X	[mm10]chrX:101656403-101656463	17	CGATTAGTAGGAAGCTGCCGCTTTTTATGTGTGTATAAGTGTTTCTGTCACCATGTGGGTGCTGGGAACTGATTTAACCTACGAGATTAGTTCTTTAGCG
Ogt_G300_S4	X	[mm10]chrX:101656466-101656526	18	CGATTAGTAGGAAGCTGCCGCAGTGCTGGTATTAGACGTAGGTGCCACCACATCTGGCAGTTTTGGTCTTCTTTTTTTGGACGAGATTAGTTCTTTAGCG
Ogt_G300_S4	X	[mm10]chrX:101656596-101656656	20	CGATTAGTAGGAAGCTGCCGCTCAAGTACTAGGATTAAAGGCATGTGCCACCACTGCCCGGTATTTTGGTCCATTTAAAAACGAGATTAGTTCTTTAGCG
Ogt_G300_S4	X	[mm10]chrX:101656943-101657003	21	CGATTAGTAGGAAGCTGCCGAAAACTCAAGTGTGGAGTCTAAATAAATATCGGGCTGGGGAAGGTAGAGAGGTAGTAGGACGCAGATTTACCATTAGTCG
Ogt_G300_S4	X	[mm10]chrX:101657006-101657066	22	CGATTAGTAGGAAGCTGCCGTTTGAATGCAGTGGCCAGCCAGCTAGTCTAGCCAGCTAGGTGAGATCCGGGCTCAGTGAGCGCAGATTTACCATTAGTCG
Ogt_G300_S4	X	[mm10]chrX:101657069-101657129	23	CGATTAGTAGGAAGCTGCCGCTTTGGCTCAAAGACAGTGTGAAAAATGGTTGAGGAAAGCAGCCCCAATCTCCGCATCCACGCAGATTTACCATTAGTCG
Ogt_G300_S4	X	[mm10]chrX:101657136-101657196	24	CGATTAGTAGGAAGCTGCCGGTATAGGTATACATATGCATAAATGTGTACATCTACTACATCAAACAGCGTGTGCAACACCGCAGATTTACCATTAGTCG
Ogt_G300_S4	X	[mm10]chrX:101657496-101657556	25	CGATTAGTAGGAAGCTGCCGTTCATATATGCTGGCACAGGCTAATTAATAATTCTAGTATTTGGGAACTTACAGCAGGAGACGAGATTAGTTCTTTAGCG
Ogt_G300_S4	X	[mm10]chrX:101657559-101657619	26	CGATTAGTAGGAAGCTGCCGTCAGAGTTCACAGCTGGCCTGAGCTATACAGAAGGATTCTATGACAAATAACATGAGAACACGAGATTAGTTCTTTAGCG
Ogt_G300_S4	X	[mm10]chrX:101657622-101657682	27	CGATTAGTAGGAAGCTGCCGGAAATCTCTGAGGAGCACTAGTGAGGTGACTCAGTGAGTAACAGTGGTTGCTCTGTGAGCACGAGATTAGTTCTTTAGCG
Ogt_G300_S4	X	[mm10]chrX:101657685-101657745	28	CGATTAGTAGGAAGCTGCCGACGACCTGAATTCAGTTCCCAGAACCCACGGTAGAAAGAGAAAACTACAGAGTGTCTTCAACGAGATTAGTTCTTTAGCG
Ogt_G300_S4	X	[mm10]chrX:101658051-101658111	29	CGATTAGTAGGAAGCTGCCGTAAAAAACCTTTCACATATATTTATTTGATACAGGCACGTAGCCTATACTGGCCTGGAACCGCAGATTTACCATTAGTCG
Ogt_G300_S4	X	[mm10]chrX:101658114-101658174	30	CGATTAGTAGGAAGCTGCCGCCTTTTGCCTCTACCTCCTCAATGCTAGGCATTTATAGGCACGCACTGCTAAGTCCAGGACGCAGATTTACCATTAGTCG
Ogt_G300_S4	X	[mm10]chrX:101658178-101658238	31	CGATTAGTAGGAAGCTGCCGCAGAGATTTTAGGCAGGAAGTGGTGACACATGTCCTTGGTTCCAGCAAAGACAGGTGTATCGCAGATTTACCATTAGTCG
Ogt_G300_S4	X	[mm10]chrX:101658244-101658304	32	CGATTAGTAGGAAGCTGCCGGTTCCAAGCTGACCAAGGCTTACCATTAGTGAGATCCTAGCTCAAACAAAAAAACCAAAACGCAGATTTACCATTAGTCG
Ogt_G300_S4	X	[mm10]chrX:101658535-101658595	33	CGATTAGTAGGAAGCTGCCGCACTTTTAGGGGATCTTTGAAACAGGCTGTCTTGGAGCTTACCATGTAGACTAGGCTGGCACGAGATTAGTTCTTTAGCG
Ogt_G300_S4	X	[mm10]chrX:101658598-101658658	34	CGATTAGTAGGAAGCTGCCGGGACTCAGAGCTATATTCCTTCATCTGTGGTTTTGATTGATCGTTTGATAGCATATACATACGAGATTAGTTCTTTAGCG
Ogt_G300_S4	X	[mm10]chrX:101658724-101658784	36	CGATTAGTAGGAAGCTGCCGATGTAATGGAAGGAATCAAACCTAAGGCTTTACATCCTGGACAAGCATTCTACCATTGAGACGAGATTAGTTCTTTAGCG
Ogt_G300_S4	X	[mm10]chrX:101659082-101659142	37	CGATTAGTAGGAAGCTGCCGTTGGATGCTGTTCCTTGTGAATAGGACTAAATAATTCCATTGGTGAAGTTGACCCTCAAACGCAGATTTACCATTAGTCG
Ogt_G300_S4	X	[mm10]chrX:101659149-101659209	38	CGATTAGTAGGAAGCTGCCGGGGCTGAGTGTGTAGCTCAGTGGCAGAATGCTTGCCTAGCATGGGGATTACGAATCTACACGCAGATTTACCATTAGTCG
Ogt_G300_S4	X	[mm10]chrX:101659212-101659272	39	CGATTAGTAGGAAGCTGCCGACACACACACACACACACACACACACACACACACAGAGAGAGAGAGACAGAGATAGACAGCGCAGATTTACCATTAGTCG
Ogt_G300_S4	X	[mm10]chrX:101659275-101659335	40	CGATTAGTAGGAAGCTGCCGCACACACACACAGAGACAGCTAGCTAGCTAGCTTGGGGAGGTATTGGGGGAGACACAGATCGCAGATTTACCATTAGTCG
Ogt_G300_S4	X	[mm10]chrX:101659626-101659686	41	CGATTAGTAGGAAGCTGCCGAGCTGCCTTTGTCTTCTTAAGTTCTAAAGGAACTAAAGTCATATGGCACCACACAGGGATACGAGATTAGTTCTTTAGCG
Ogt_G300_S4	X	[mm10]chrX:101659689-101659749	42	CGATTAGTAGGAAGCTGCCGCTCTTCATCTAATTCTCACTGGTCTGAAACTTGATGTGTAAGACCAGGCTGGCCTGGAATACGAGATTAGTTCTTTAGCG
Ogt_G300_S4	X	[mm10]chrX:101659752-101659812	43	CGATTAGTAGGAAGCTGCCGCAGAATTCTACCCATCTCTGCCTCTGCCTCCCAAATGCTGGGATTAAAGGCATATCCCACACGAGATTAGTTCTTTAGCG
Ogt_G300_S4	X	[mm10]chrX:101659815-101659875	44	CGATTAGTAGGAAGCTGCCGGCCCTGCTCATTTTTAAAGTATGATAATGGTAGTGTGGTTATGTTGGAGTAAAAAACCAGACGAGATTAGTTCTTTAGCG
Ogt_G300_S4	X	[mm10]chrX:101660083-101660143	45	CGATTAGTAGGAAGCTGCCGGTATTTAAAAGGAGCAGGTGTGGTTCATGCCTATAATCTCAGGCCTTGGGAGGTTGAGGCCGCAGATTTACCATTAGTCG
Ogt_G300_S4	X	[mm10]chrX:101660146-101660206	46	CGATTAGTAGGAAGCTGCCGAGGATTGATTGCCGTGAGTCCTGGGCCACACTGTCTTATATAGCGAATTCTAAGATAGCCCGCAGATTTACCATTAGTCG
Ogt_G300_S4	X	[mm10]chrX:101660209-101660269	47	CGATTAGTAGGAAGCTGCCGGGCTGACAGCAGAGTTAGACTTTACCTCAAAACAAAAAGTTCAAATGGTTTTCAGGGTAGCGCAGATTTACCATTAGTCG
Ogt_G300_S4	X	[mm10]chrX:101660630-101660690	49	CGATTAGTAGGAAGCTGCCGTGGCTTAATGTTCCAACTCTAATTACATATCTTACTGAGGACTTGCTGAGCTGTGTGTATACGAGATTAGTTCTTTAGCG
Ogt_G300_S4	X	[mm10]chrX:101660693-101660753	50	CGATTAGTAGGAAGCTGCCGGTAGAGGAACATACATACTTAAGAGCTCACTGCTTGTTTCTACCACTATCTTTTAGAAGAACGAGATTAGTTCTTTAGCG
Ogt_G300_S4	X	[mm10]chrX:101660756-101660816	51	CGATTAGTAGGAAGCTGCCGAAATTAACTGAAGACAATAGGGCCAAGCATTAGAAATACTTATATGGTAGCGCAAGCCTTACGAGATTAGTTCTTTAGCG
Ogt_G300_S4	X	[mm10]chrX:101660819-101660879	52	CGATTAGTAGGAAGCTGCCGTAGTAGCACTTGGGAGGTAGAGGCAGGTCTGAACTCAGGATCTCTGCAAGAGCAGTCAGTACGAGATTAGTTCTTTAGCG
Ogt_G300_S4	X	[mm10]chrX:101661215-101661275	53	CGATTAGTAGGAAGCTGCCGTCCTATCTTTTTCTAACTGACTGTCTTCTAATTTTAGGCTGTCACCCTTGACCCAAATTTCGCAGATTTACCATTAGTCG
Ogt_G300_S4	X	[mm10]chrX:101661278-101661338	54	CGATTAGTAGGAAGCTGCCGGGATGCTTATATCAATTTAGGAAATGTCTTGAAAGAGGCACGCATTTTTGACAGGTAAGACGCAGATTTACCATTAGTCG
Ogt_G300_S4	X	[mm10]chrX:101661345-101661405	55	CGATTAGTAGGAAGCTGCCGGTTTGATCAATTTCCTTGTCTTTCTAGTTTGGACTAAAATGTGGCAATAGCTTCCAGAAGCGCAGATTTACCATTAGTCG
Ogt_G300_S4	X	[mm10]chrX:101661408-101661468	56	CGATTAGTAGGAAGCTGCCGATTTATCAGCGTGCTCTCCCCTCCTGCTTCGTCACACTCTATTTCACAGTTTGGTGACTTCGCAGATTTACCATTAGTCG
Ogt_G300_S4	X	[mm10]chrX:101661827-101661887	57	CGATTAGTAGGAAGCTGCCGGCCATCTCACCAGCCCCCTAAAATCAGCTTTTCTAATTTATGTGTGTGTATGTGTGTGTGACGAGATTAGTTCTTTAGCG
Ogt_G300_S4	X	[mm10]chrX:101661890-101661950	58	CGATTAGTAGGAAGCTGCCGGTGTGTGTTGTATGTACAGGTGTGTGCAGGTGAATGGCACATGGGAGTCCTGAAGAGAACACGAGATTAGTTCTTTAGCG
Ogt_G300_S4	X	[mm10]chrX:101661953-101662013	59	CGATTAGTAGGAAGCTGCCGGGTGTCTGTCCCCATTGTATCATTTTGTACTTTATTCCTTTGAGGCATTCTTTCCTTGAAACGAGATTAGTTCTTTAGCG
Ogt_G300_S4	X	[mm10]chrX:101662016-101662076	60	CGATTAGTAGGAAGCTGCCGAGGGTTTACATTTTTGGCTAGGTTGCCAGTCAGTATACCTCAATGATCTCCTGTTGTAGTACGAGATTAGTTCTTTAGCG
Ogt_G300_S4	X	[mm10]chrX:101662377-101662437	61	CGATTAGTAGGAAGCTGCCGCCAGTGCTTCTGCCCACTGAGTCAGCTCTCCCCAGCTCTCCAGCCTTTGGTAACTTTTTTCGCAGATTTACCATTAGTCG
Ogt_G300_S4	X	[mm10]chrX:101662444-101662504	62	CGATTAGTAGGAAGCTGCCGAAGGAAAGCCGAGCAGGAACACACAAATGTTTTTCTCTGAAAATATGTTTTATAGTCTGGCGCAGATTTACCATTAGTCG
Ogt_G300_S4	X	[mm10]chrX:101662508-101662568	63	CGATTAGTAGGAAGCTGCCGTGGGAGGCTGAAGCAGGAGGATTGCTGTGAGTTCAAGGCCAGGCCCTTGATAGAGTAAGACGCAGATTTACCATTAGTCG
Ogt_G300_S4	X	[mm10]chrX:101662571-101662631	64	CGATTAGTAGGAAGCTGCCGTTTCTCAAAAACCATCCTGGGCTTGGTTGTAGTTGCTCACACCTGTAATACTACCACTTGCGCAGATTTACCATTAGTCG
Ogt_G300_S4	X	[mm10]chrX:101662993-101663053	65	CGATTAGTAGGAAGCTGCCGAGCCCTTGTTTAGCATGCATGAGGCCCTAAGTTCAGTTCTTAGCACCACAAAAAATATATACGAGATTAGTTCTTTAGCG
Ogt_G300_S4	X	[mm10]chrX:101663121-101663181	67	CGATTAGTAGGAAGCTGCCGTGGCATTTCATTTAATAAACTATTAAGGTTAGTTGGGCGAGATGGCTCAGTGAGTAAAAGACGAGATTAGTTCTTTAGCG
Ogt_G300_S4	X	[mm10]chrX:101663184-101663244	68	CGATTAGTAGGAAGCTGCCGAAGCCAGTGACCTGAGTTTGATCCCTGGAACCCACAATGGAACCAACTTCACAAAGCTGCACGAGATTAGTTCTTTAGCG
Ogt_G300_S4	X	[mm10]chrX:101663542-101663602	69	CGATTAGTAGGAAGCTGCCGAGAGAAGGGCAGTGTAAGGATTTTGCCTTATTTTTACTTCCTTGTTATGTGGTAGAAAAGCGCAGATTTACCATTAGTCG
Ogt_G300_S4	X	[mm10]chrX:101663668-101663728	71	CGATTAGTAGGAAGCTGCCGTATATTGATTTCCTTTGGAGTGTTGTTTGCTGGGCAGGAGGATACTGGAAAGTGTCTGTTCGCAGATTTACCATTAGTCG
Ogt_G300_S4	X	[mm10]chrX:101663731-101663791	72	CGATTAGTAGGAAGCTGCCGTGGTGTGTTCCCAACCATTAGACTCAATGATGCACCTACTTGAATTACTAGAATAACAGTCGCAGATTTACCATTAGTCG
Ogt_G300_S4	X	[mm10]chrX:101664167-101664227	73	CGATTAGTAGGAAGCTGCCGAGGTCAGGCTGGCCTCAAACCCAGAGAGTCCTAAGTGTTGGGGTTAATAAAGGTGTGCCCACGAGATTAGTTCTTTAGCG
Ogt_G300_S4	X	[mm10]chrX:101664230-101664290	74	CGATTAGTAGGAAGCTGCCGCACTGCTCAGCTGCCATTCACCTCTTTAAGAGGATCATTCATTATTGATGTAAGGTCCTGACGAGATTAGTTCTTTAGCG
Ogt_G300_S4	X	[mm10]chrX:101664293-101664353	75	CGATTAGTAGGAAGCTGCCGACATGTAAGACACCCCTATATTGAGCTCATTATGCATAGGTGAGATCTGCACAAAGATTGACGAGATTAGTTCTTTAGCG
Ogt_G300_S4	X	[mm10]chrX:101664356-101664416	76	CGATTAGTAGGAAGCTGCCGAGTAAGCTAAGTAAAGCTAGTGCAGTGAAGAACTCAGGCCTGTGTCTAGTGGTTAGTAGGACGAGATTAGTTCTTTAGCG
Ogt_G300_S4	X	[mm10]chrX:101664658-101664718	77	CGATTAGTAGGAAGCTGCCGTGCTGCTGCACATTCCAATTTAGCAAGTGTACTGCAACAGCAGGGCAAGCTGCAGGAAGCCGCAGATTTACCATTAGTCG
Ogt_G300_S4	X	[mm10]chrX:101664721-101664781	78	CGATTAGTAGGAAGCTGCCGGATGCACTATAAAGAAGCCATACGGTAAGAAACTCAGAGCTGCTTTCTTTCTATTTTCATCGCAGATTTACCATTAGTCG
Ogt_G300_S4	X	[mm10]chrX:101664787-101664847	79	CGATTAGTAGGAAGCTGCCGGATTATAATTATATCATTTTCTCTTTCCTGCCTCTCCAAAACCCTCCCATAAACCATACCCGCAGATTTACCATTAGTCG
Ogt_G300_S4	X	[mm10]chrX:101664851-101664911	80	CGATTAGTAGGAAGCTGCCGTGCTCTCAAATCCATGGCCACCTTTTTCATGAATTGTTGTAACGCACATATATGTATATGCGCAGATTTACCATTAGTCG
Ogt_G300_S4	X	[mm10]chrX:101665245-101665305	81	CGATTAGTAGGAAGCTGCCGAGATCCACCTGCCTCTGCCTCCTCTGCCTCCTCTGCCTCTCAAAATTCAGGGATTAAAGTACGAGATTAGTTCTTTAGCG
Ogt_G300_S4	X	[mm10]chrX:101665308-101665368	82	CGATTAGTAGGAAGCTGCCGGTGCCACCACTACCTGGCATCTATTTTTGTTAAGGCTTGGCATAGTGCTATATACTTTAAACGAGATTAGTTCTTTAGCG
Ogt_G300_S4	X	[mm10]chrX:101665375-101665435	83	CGATTAGTAGGAAGCTGCCGACTCAGGAGCTTATGTAGTTCGATCTCTGTGAATTTAAGGCCAGCCTAATCTACGTAGCAACGAGATTAGTTCTTTAGCG
Ogt_G300_S4	X	[mm10]chrX:101665438-101665498	84	CGATTAGTAGGAAGCTGCCGGCTAGGCCAGCCAGGGCTACATGGTAAGACACCGTGTAAAACAAAAATTTGGGCCTGGAGACGAGATTAGTTCTTTAGCG
Ogt_G300_S4	X	[mm10]chrX:101665853-101665913	85	CGATTAGTAGGAAGCTGCCGTGCGCCACCACGCCGGGCTATTTTAAACTTTTTAAGAGCCAGGGTTTCATTATGTAGCCCCGCAGATTTACCATTAGTCG
Ogt_G300_S4	X	[mm10]chrX:101665916-101665976	86	CGATTAGTAGGAAGCTGCCGCTGTTCTGGAACTTACTATGTAGATCAGGCTGGCCTTTAAACTTACTGAAATTTACCTACCGCAGATTTACCATTAGTCG
Ogt_G300_S4	X	[mm10]chrX:101665981-101666041	87	CGATTAGTAGGAAGCTGCCGCCCCCCATGTCCTGGGTTTAAAGGCCTGTACTGCCATACTCGGCTTCCTTATTTTAAACCCGCAGATTTACCATTAGTCG
Ogt_G300_S4	X	[mm10]chrX:101666048-101666108	88	CGATTAGTAGGAAGCTGCCGCATTAAAAATTATTCATCTGTATATGGGTATATGTTGTGCATGTAGGTCCCTACTGAGGCCGCAGATTTACCATTAGTCG
Ogt_G300_S4	X	[mm10]chrX:101666563-101666623	90	CGATTAGTAGGAAGCTGCCGTATTTTGTGGGTGTGAGGAAATGTGGGCTTATACTGTAGTGCCCATGTGGAGGTCAGAGGACGAGATTAGTTCTTTAGCG
Ogt_G300_S4	X	[mm10]chrX:101666627-101666687	91	CGATTAGTAGGAAGCTGCCGCTTATTGGAGTTGTTTCAGCTTTTCATAGTTTCTGTGGTTGAACTCAGTTATCAAGCTTGACGAGATTAGTTCTTTAGCG
Ogt_G300_S4	X	[mm10]chrX:101666690-101666750	92	CGATTAGTAGGAAGCTGCCGGTAGCTTCCTTTACCTGCTGAGCCATCTCACTAACCTTTTCAAATTACTCCTTTTTTTTCACGAGATTAGTTCTTTAGCG
Ogt_G300_S4	X	[mm10]chrX:101667088-101667148	93	CGATTAGTAGGAAGCTGCCGTTACCTAATTAAAGGTTTGACATTTGGCAGGTGTTAAAATGATTCTCCTTCCCTCTTTGGCGCAGATTTACCATTAGTCG
Ogt_G300_S4	X	[mm10]chrX:101667151-101667211	94	CGATTAGTAGGAAGCTGCCGTGGGGTTTCAAACTAGGCCTCACGCTTGGTAGGCGAGTATTGTAGCACTAAACCATGTGCCGCAGATTTACCATTAGTCG
Ogt_G300_S4	X	[mm10]chrX:101667214-101667274	95	CGATTAGTAGGAAGCTGCCGAGCCCCCAAGTGCTTTACAACAAGATTTTGCATGAGGTAATCAAACCTTTGTCTTCTCCTCGCAGATTTACCATTAGTCG
Ogt_G300_S4	X	[mm10]chrX:101667277-101667337	96	CGATTAGTAGGAAGCTGCCGGAATTAGTCCTACATTTGCTGATGCTTATTCCAATATGGGAAACACTCTAAAGGAGATGCCGCAGATTTACCATTAGTCG
Ogt_G300_S4	X	[mm10]chrX:101667649-101667709	97	CGATTAGTAGGAAGCTGCCGCTGCAACGTCACCATTTTTTAATTGTGTGTCATAATAATCTAGGCCTGTTTAGAGACAAGACGAGATTAGTTCTTTAGCG
Ogt_G300_S4	X	[mm10]chrX:101667775-101667835	99	CGATTAGTAGGAAGCTGCCGAGCTTTTAGGAGTCATTTCTTTTAGCACCTGGGTCCTAGGCATTGGACTCGTTGTCAGGTACGAGATTAGTTCTTTAGCG
Ogt_G300_S4	X	[mm10]chrX:101667838-101667898	100	CGATTAGTAGGAAGCTGCCGCAAGGTACGCCTTTTCTCAGCGAGCCAGCCGCAAGACCATGCTTGTAGGAGATTGCCTAAACGAGATTAGTTCTTTAGCG
Ogt_G300_S4	X	[mm10]chrX:101668219-101668279	101	CGATTAGTAGGAAGCTGCCGATAAATTAAATGTATGGCTTTACCAGCTAGAAATGAAACTGTCTTAGCTGCCCTTGAAGCCGCAGATTTACCATTAGTCG
Ogt_G300_S4	X	[mm10]chrX:101668282-101668342	102	CGATTAGTAGGAAGCTGCCGTCTTCACTGTGGCTTCACTGTGGCCTGACTGCAGCGCAGTTCTTCGTTTCTAATGGTAGTCGCAGATTTACCATTAGTCG
Ogt_G300_S4	X	[mm10]chrX:101668345-101668405	103	CGATTAGTAGGAAGCTGCCGTTCCTTTAAGGTGGAAATTTAGGCTAGGCATAGTGGCACAAACCTATCCCAGTACTTCTGCGCAGATTTACCATTAGTCG
Ogt_G300_S4	X	[mm10]chrX:101668408-101668468	104	CGATTAGTAGGAAGCTGCCGTCTCAAAACTTAGAGGCAGAGGATGGTGAATTGAGGCCAGCCTAGGCTACATAGCATACACGCAGATTTACCATTAGTCG
Ogt_G300_S4	X	[mm10]chrX:101668766-101668826	105	CGATTAGTAGGAAGCTGCCGGTTTAGAACCTGCTCCAGGAAGGAAACAGTGGTAGATTCTCTGTCTCTTTCCCCCCCCCCACGAGATTAGTTCTTTAGCG
Ogt_G300_S4	X	[mm10]chrX:101668829-101668889	106	CGATTAGTAGGAAGCTGCCGTCCCTCCTCCCTCTTTCCTTCTTTCTCCCTCCCTCCTTCCTCTCCCCCCCCCAAAAAATGACGAGATTAGTTCTTTAGCG
Ogt_G300_S4	X	[mm10]chrX:101668892-101668952	107	CGATTAGTAGGAAGCTGCCGCTCCACAGAATTTCCTAAAATACGGTAAGGGTTTTCCTACTCCATTCACATTTCTTTCTTACGAGATTAGTTCTTTAGCG
Ogt_G300_S4	X	[mm10]chrX:101668955-101669015	108	CGATTAGTAGGAAGCTGCCGAGAACTGTGAGATCTGTTCAGGCTGTTTCATAGGTCTCAGTACAGGTTATGTATGAAGCAACGAGATTAGTTCTTTAGCG
Ogt_G300_S4	X	[mm10]chrX:101669308-101669368	109	CGATTAGTAGGAAGCTGCCGCCCAGCTCTCCAATTTTAGATTTGTCATCATTTGTTTTAGCTTTGTTTGGGATAGGTTTCCGCAGATTTACCATTAGTCG
Ogt_G300_S4	X	[mm10]chrX:101669371-101669431	110	CGATTAGTAGGAAGCTGCCGTATGCCAGGTTAGCTTTAAATTCTCTGAGGATCACCTCGAACCTCAGATCCTTTATATTTCGCAGATTTACCATTAGTCG
Ogt_G300_S4	X	[mm10]chrX:101669434-101669494	111	CGATTAGTAGGAAGCTGCCGCCTCACAATTACAGGGTCTCAGGGGTGCACCAACATGCTCATGTAGTTTTTGTCGTTGTTCGCAGATTTACCATTAGTCG
Ogt_G300_S4	X	[mm10]chrX:101669497-101669557	112	CGATTAGTAGGAAGCTGCCGTTGTCTCACTACATGATACTGGATGGCTGGTAACCCAGTGTGTAGGCTCAGCGATCCATACGCAGATTTACCATTAGTCG
Ogt_G300_S4	X	[mm10]chrX:101669855-101669915	113	CGATTAGTAGGAAGCTGCCGTCACCCTACTTCACACCTTATGCAGTCTATTCCAGGCATGCATAATCCTGATAAGTTTGAACGAGATTAGTTCTTTAGCG
Ogt_G300_S4	X	[mm10]chrX:101669918-101669978	114	CGATTAGTAGGAAGCTGCCGAAGAATGGGTTTTTTGGTGGCTTTACCCTGTCATCTTCAGCATTAACTTCACTTCCTTTTACGAGATTAGTTCTTTAGCG
Ogt_G300_S4	X	[mm10]chrX:101669981-101670041	115	CGATTAGTAGGAAGCTGCCGAAGGTTGGAGCAAAGGTTATTGAGCACACTGTCCCCTCCCTGCCTTTCAGGTATTCTGCTACGAGATTAGTTCTTTAGCG
Ogt_G300_S4	X	[mm10]chrX:101670044-101670104	116	CGATTAGTAGGAAGCTGCCGCCTTGAGCCCGGATGATGGTACAAACTTTCGAGTGAAGGTGATGGCGGAAGCCAATCATTACGAGATTAGTTCTTTAGCG
Ogt_G300_S4	X	[mm10]chrX:101670847-101670907	117	CGATTAGTAGGAAGCTGCCGCAGAGACTTACTATGCTCCTAACCCTGTCTGGCCTGAAATACACAATGTAGACCAGGTTGCGCAGATTTACCATTAGTCG
Ogt_G300_S4	X	[mm10]chrX:101670910-101670970	118	CGATTAGTAGGAAGCTGCCGTTCTGTAGTGTTCCTTTTGCTTCAGCCCTCTATAAGTTCTGAGATTGTGGTAGGTGCTACCGCAGATTTACCATTAGTCG
Ogt_G300_S4	X	[mm10]chrX:101670973-101671033	119	CGATTAGTAGGAAGCTGCCGGCCCTTCTGGTTAGTTGTCTTTATTTCTGTGTTTGGCTCTGTTCTTTACTCTGTAAATTTCGCAGATTTACCATTAGTCG
Ogt_G300_S4	X	[mm10]chrX:101671394-101671454	121	CGATTAGTAGGAAGCTGCCGCTCAGTCAACTGTGGAGATCTTGCAGTACTACTCTTGAACCTTCTTTTCTGAAGACTGGGACGAGATTAGTTCTTTAGCG
Ogt_G300_S4	X	[mm10]chrX:101671457-101671517	122	CGATTAGTAGGAAGCTGCCGCTCAGTGAACCTGGGGCTAGGCTGGAAGCTAGCAAACTCTGTATCCTCCTGCCTTCAACCACGAGATTAGTTCTTTAGCG
Ogt_G300_S4	X	[mm10]chrX:101671520-101671580	123	CGATTAGTAGGAAGCTGCCGACAGACCTAAGGTTTGAGGTGCACATGGGTGGCCACATCTGGCTTTTTATATGGATCCTGACGAGATTAGTTCTTTAGCG
Ogt_G300_S4	X	[mm10]chrX:101671583-101671643	124	CGATTAGTAGGAAGCTGCCGGCCACACTCAGGTCATCTTGCTTGTATAGGAAGCACTAGCACTCTTACTGAGTCTGTTATACGAGATTAGTTCTTTAGCG
Ogt_G300_S4	X	[mm10]chrX:101672402-101672462	125	CGATTAGTAGGAAGCTGCCGTGTATTAATCTAAGATTCTACATCGTTCTTCCTGTGTGTTCCACAGATTCCTTGTAATGGCGCAGATTTACCATTAGTCG
Ogt_G300_S4	X	[mm10]chrX:101672465-101672525	126	CGATTAGTAGGAAGCTGCCGAGCAGCCGACCGCATCCACCAAGATGGAATTCACATCCTTGTGAATATGAATGGGTATACCGCAGATTTACCATTAGTCG
Ogt_G300_S4	X	[mm10]chrX:101672528-101672588	127	CGATTAGTAGGAAGCTGCCGGGGTGCTCGGAATGAGCTCTTTGCTCTTAGGCCAGCTCCTATTCAGGTAAAAGAACAATCCGCAGATTTACCATTAGTCG
Ogt_G300_S4	X	[mm10]chrX:101672591-101672651	128	CGATTAGTAGGAAGCTGCCGTACAATGTCTATTGGTCTGAAAAGATAGTGGGTTTTGGGTTTTCTCCATCTGGCTAACTGCGCAGATTTACCATTAGTCG
Ogt_G300_S4	X	[mm10]chrX:101672949-101673009	129	CGATTAGTAGGAAGCTGCCGGATGGTTGCTATATCTACAGTAAGTTGGTAGGTTTATGGATGGATAACAGTTGTTAGCTTACGAGATTAGTTCTTTAGCG
Ogt_G300_S4	X	[mm10]chrX:101673012-101673072	130	CGATTAGTAGGAAGCTGCCGGTCTGATTGTTTTTGTTTGTATTTTTTTAAGGCCATGTGGCTGGGCTACCCTGGGACTAGACGAGATTAGTTCTTTAGCG
Ogt_G300_S4	X	[mm10]chrX:101673075-101673135	131	CGATTAGTAGGAAGCTGCCGTGCACTGTTCATGGATTACATCATCACTGATCAGGAAACTTCCCCAGCTGAAGTTGCAGAACGAGATTAGTTCTTTAGCG
Ogt_G300_S4	X	[mm10]chrX:101673142-101673202	132	CGATTAGTAGGAAGCTGCCGTCTGAGAAACTGGCTTATATGCCCCATACTTTCTTTATTGGTGATCATGCTAATATGTTCACGAGATTAGTTCTTTAGCG
Ogt_G300_S4	X	[mm10]chrX:101673511-101673571	133	CGATTAGTAGGAAGCTGCCGCATTTTTGTCTTGCTGATTTTTTTTTTCCAGATGAAATGTCCTGATGGAGGTGACAATCCCGCAGATTTACCATTAGTCG
Ogt_G300_S4	X	[mm10]chrX:101673574-101673634	134	CGATTAGTAGGAAGCTGCCGCAGCAGTAACACAGCTCTTAATATGCCCGTTATTCCCATGAATACGATTGCAGAAGCAGTCGCAGATTTACCATTAGTCG
Ogt_G300_S4	X	[mm10]chrX:101673641-101673701	135	CGATTAGTAGGAAGCTGCCGATGATTAACAGAGGGCAGATTCAGATAACAATTAACGGATTCAGTATTAGCAATGGACTGCGCAGATTTACCATTAGTCG
Ogt_G300_S4	X	[mm10]chrX:101673704-101673764	136	CGATTAGTAGGAAGCTGCCGACTACACAGGTAAAAGGACTGTAATTATGTATCACATACATGACACCCATCCTTTCCTCTCGCAGATTTACCATTAGTCG
Ogt_G300_S4	X	[mm10]chrX:101674652-101674712	137	CGATTAGTAGGAAGCTGCCGTCTTAGCCACTGAGCCATCTCTCCAGCCTGTCAGTTTAGATCTTAAAGTCCCCAGTTTCTACGAGATTAGTTCTTTAGCG
Ogt_G300_S4	X	[mm10]chrX:101674715-101674775	138	CGATTAGTAGGAAGCTGCCGTTAATCTCTAGTCTCTTTTTTTCCATACTCATTGATGCCAGCTTGCTGTGCTTTTGTAGGACGAGATTAGTTCTTTAGCG
Ogt_G300_S4	X	[mm10]chrX:101674778-101674838	139	CGATTAGTAGGAAGCTGCCGGGGTGTACATTATATTCAGCACAATGCAGTGTAGTTCCTTGTATTTGTATCTTTCAGCAAACGAGATTAGTTCTTTAGCG
Ogt_G300_S4	X	[mm10]chrX:101675201-101675261	141	CGATTAGTAGGAAGCTGCCGAGGGTTTTAGTTATTTCTGGTTGTTTTTTTGAGACAAAGTTTATTTTGGGTAGCCCTGCCCGCAGATTTACCATTAGTCG
Ogt_G300_S4	X	[mm10]chrX:101675267-101675327	142	CGATTAGTAGGAAGCTGCCGGGAACTCTCTGAACTGCCTCTGCCTCCCAAGGGCTGAGAGTAAAGGCTACCGTCACCAGCCGCAGATTTACCATTAGTCG
Ogt_G300_S4	X	[mm10]chrX:101675334-101675394	143	CGATTAGTAGGAAGCTGCCGTTTTTGTTTGTTTGGTTTGGTTTGGTTTGGTTTTTGTGAGACAGGATCTGGCTATTTAGCCGCAGATTTACCATTAGTCG
Ogt_G300_S4	X	[mm10]chrX:101675397-101675457	144	CGATTAGTAGGAAGCTGCCGGACTATTCTAAAGCTTCACAGCTCTCCTGCCCTTTCAGTATCTTGACTGAAGCAAGAATTCGCAGATTTACCATTAGTCG
Ogt_G300_S4	X	[mm10]chrX:101675755-101675815	145	CGATTAGTAGGAAGCTGCCGAAGAGGTGAGAGAGCGAGCGAGTGAGTATTGGGTCAGAAGAAAGAAGAGTATGTGTGTCAACGAGATTAGTTCTTTAGCG
Ogt_G300_S4	X	[mm10]chrX:101675818-101675878	146	CGATTAGTAGGAAGCTGCCGACAGGACCTTATGCATTCTAGATAAGTACTCTGCTATATAAATATAACCCCATCCCTTGGACGAGATTAGTTCTTTAGCG
Ogt_G300_S4	X	[mm10]chrX:101675881-101675941	147	CGATTAGTAGGAAGCTGCCGGTCCCCCTTTTGGAAAGGCTTTTGTCAGTGGGGTTCTCATATAGCCCTGGCTAGCTTCAAACGAGATTAGTTCTTTAGCG
Ogt_G300_S4	X	[mm10]chrX:101675944-101676004	148	CGATTAGTAGGAAGCTGCCGCTGATTTTTGGTCCTCCAACATCTATGTCCTGAGTGCTAGAATTATAGGTAAGTATACCAACGAGATTAGTTCTTTAGCG
Ogt_G300_S4	X	[mm10]chrX:101676283-101676343	149	CGATTAGTAGGAAGCTGCCGCCTGCAGATGTGGGCAAATGTGAGTATGTGTAGGTTTATTATTAATGCCCATTAATGAGTCGCAGATTTACCATTAGTCG
Ogt_G300_S4	X	[mm10]chrX:101676346-101676406	150	CGATTAGTAGGAAGCTGCCGGATCTATACGAGCTATCTTGCTGAATCTCCCTTCCCCATTTTGTTTATGGACTGTTGTATCGCAGATTTACCATTAGTCG
Ogt_G300_S4	X	[mm10]chrX:101676472-101676532	152	CGATTAGTAGGAAGCTGCCGTAAATAATATTTCTCCTTTTCTTCCCGCCAAACCCTCCCATACATACTCCCTTTTCTCTTCGCAGATTTACCATTAGTCG
Ogt_G300_S4	X	[mm10]chrX:101676784-101676844	153	CGATTAGTAGGAAGCTGCCGTAATCCAGGATTCCCTTCATGCCAGGCAAGTAACTGTACCAACTGAGCTATGTTCACAGTACGAGATTAGTTCTTTAGCG
Ogt_G300_S4	X	[mm10]chrX:101676847-101676907	154	CGATTAGTAGGAAGCTGCCGTTTCAGTTTGTATTTTACCTTCTAACGTTGTCTTATTTTCCCCCAGTGTTGACGGATCAAACGAGATTAGTTCTTTAGCG
Ogt_G300_S4	X	[mm10]chrX:101676910-101676970	155	CGATTAGTAGGAAGCTGCCGTGGGGTTGATAAACAGTAGATAAGCTTTGTATCAGTGAGCTTTGTCCCCAGTTTTTTTTTACGAGATTAGTTCTTTAGCG
Ogt_G300_S4	X	[mm10]chrX:101677405-101677465	157	CGATTAGTAGGAAGCTGCCGGAGTGTCAGATCTCTTGAACAGGGATTATACTGTAAGCTGCCATGTGTGTGTTAGAAATTCGCAGATTTACCATTAGTCG
Ogt_G300_S4	X	[mm10]chrX:101677468-101677528	158	CGATTAGTAGGAAGCTGCCGCCCAGGTTTTCAGGAAGAGCAGCCAATGTGAATGCATGTTGGTGTACCACATGTATACTTCGCAGATTTACCATTAGTCG
Ogt_G300_S4	X	[mm10]chrX:101677535-101677595	159	CGATTAGTAGGAAGCTGCCGATGAAGGACAGAAATGGGCATTGATCCCTTGGAACTGGAGTTACAGTATTGATGCTGGGACGCAGATTTACCATTAGTCG
Ogt_G300_S4	X	[mm10]chrX:101677598-101677658	160	CGATTAGTAGGAAGCTGCCGGAGACAGAGAATTGCTTGAGTCCTGGAGTTTGTGGCCAGCCTGGGAAACTTAATGAGATCCGCAGATTTACCATTAGTCG
Ogt_G300_S4	X	[mm10]chrX:101678028-101678088	161	CGATTAGTAGGAAGCTGCCGTCTCCATTCTTAATGCAAGCAAGCCCAGTTAAATTCAGTGGATTGTAAACACACAAAAACACGAGATTAGTTCTTTAGCG
Ogt_G300_S4	X	[mm10]chrX:101678091-101678151	162	CGATTAGTAGGAAGCTGCCGAACTATATACATGAAGGTAGGGGGAGTCAGCAAAAATTGGAGGGGTAAATAATGGAGGGTACGAGATTAGTTCTTTAGCG
Ogt_G300_S4	X	[mm10]chrX:101678154-101678214	163	CGATTAGTAGGAAGCTGCCGAATGATACACACACACACACACACACACACACACACACACACACACAGAATTTTCAAAAGACGAGATTAGTTCTTTAGCG
Ogt_G300_S4	X	[mm10]chrX:101678221-101678281	164	CGATTAGTAGGAAGCTGCCGAACATGCAAATTAACAAAGCAAAGACACCCCAAATTCCCATCTTTAATGAAGACCATTGCACGAGATTAGTTCTTTAGCG
Ogt_G300_S4	X	[mm10]chrX:101678579-101678639	165	CGATTAGTAGGAAGCTGCCGGGACTACATCACAAGACCCCAAGTGTACTTTCCAATGGAAAGAGTAAAGTGAAGTAGAATCGCAGATTTACCATTAGTCG
Ogt_G300_S4	X	[mm10]chrX:101678705-101678765	167	CGATTAGTAGGAAGCTGCCGAAAGATTCTGAAACGTGTGCCTAACAGCGTGCTTTGGCTGTTGCGTTTTCCAGCAGTAGGCGCAGATTTACCATTAGTCG
Ogt_G300_S4	X	[mm10]chrX:101678768-101678828	168	CGATTAGTAGGAAGCTGCCGACCCAATATTCAACAATATGCACAAAATATGGGCCTTCCCCAGAACCGTATCATTTTCTCCGCAGATTTACCATTAGTCG
Ogt_G300_S4	X	[mm10]chrX:101679123-101679183	169	CGATTAGTAGGAAGCTGCCGCCTCTCCATCTGTAATGTGTGGATATTTAAATGCAATTAGCAATGACGACTATGTGACTTACGAGATTAGTTCTTTAGCG
Ogt_G300_S4	X	[mm10]chrX:101679186-101679246	170	CGATTAGTAGGAAGCTGCCGGTTCTAAGATGTACAATTACTATCTTTTTACTTTCTAGGAGAGACTCTTGCCTCTCGAGTACGAGATTAGTTCTTTAGCG
Ogt_G300_S4	X	[mm10]chrX:101679249-101679309	171	CGATTAGTAGGAAGCTGCCGAGCTTCTCAGCTTACTTGTCTAGGATGTCTCGAGCTCATTGCTAAAAGCAGACAGGAATAACGAGATTAGTTCTTTAGCG
Ogt_G300_S4	X	[mm10]chrX:101679312-101679372	172	CGATTAGTAGGAAGCTGCCGAGACATAGCTGTGAAACTGGGAACCGATCTAGAATAGTAAGTAAACTGCCAGGAACAAACACGAGATTAGTTCTTTAGCG
Ogt_G300_S4	X	[mm10]chrX:101679685-101679745	173	CGATTAGTAGGAAGCTGCCGTCTATGAGTTTCAGGCCAGCATGGTCTGTAGAGCACGTTCAGGATATTTAAGGGCTTTATCGCAGATTTACCATTAGTCG
Ogt_G300_S4	X	[mm10]chrX:101679749-101679809	174	CGATTAGTAGGAAGCTGCCGCAGAGAAACCCTCTCTGGGAAAACCAAACCAAACCTTTTTGTATATTTTTATCCTACAGTCGCAGATTTACCATTAGTCG
Ogt_G300_S4	X	[mm10]chrX:101679812-101679872	175	CGATTAGTAGGAAGCTGCCGTCCAGAACACAATTTCTCCTCACTCCATTCCTGCCAGTCCTTGTGTCCCCTGTCCTGTCTCGCAGATTTACCATTAGTCG
Ogt_G300_S4	X	[mm10]chrX:101679875-101679935	176	CGATTAGTAGGAAGCTGCCGCCAGATTTGCTTCTCTGTGAACATGGCACAGTAAGACTAGGCATGAACCCAGAACAGGCACGCAGATTTACCATTAGTCG
Ogt_G300_S4	X	[mm10]chrX:101680233-101680293	177	CGATTAGTAGGAAGCTGCCGCTCTCTCTCTCTCTTCCTTTCCTTTCCTTTCCTTTCCTTTCCTTTCCTTTCCTTTCCTTTACGAGATTAGTTCTTTAGCG
Ogt_G300_S4	X	[mm10]chrX:101680296-101680356	178	CGATTAGTAGGAAGCTGCCGTTCCTTTCCTTTCCTTTCCTTTCCTTTCCTTCCTTTCCTTCCTTTCCTTCCTTTCCTTCCACGAGATTAGTTCTTTAGCG
Ogt_G300_S4	X	[mm10]chrX:101680359-101680419	179	CGATTAGTAGGAAGCTGCCGTCCCTTTCCCTTTTCCCTTTTCCCTTTTCCCTTTTCCCTTTTCCCTTTTCCCTTTTCCCTACGAGATTAGTTCTTTAGCG
Ogt_G300_S4	X	[mm10]chrX:101680422-101680482	180	CGATTAGTAGGAAGCTGCCGCCCTTTTCCCTTTTCCCTTTTCCCTTTTCCCTTTTCCCTTTTCCCTTTCTTTCTTTCTTTACGAGATTAGTTCTTTAGCG
Ogt_G300_S4	X	[mm10]chrX:101681416-101681476	181	CGATTAGTAGGAAGCTGCCGGATTGCCTTAAGTTTTAGGCAAGCCTAGACTATAGAATATTGAACCCTTGTCTCAACTAACGCAGATTTACCATTAGTCG
Ogt_G300_S4	X	[mm10]chrX:101681542-101681602	183	CGATTAGTAGGAAGCTGCCGTTTAAGAATTTCTAGACTGGGCATGGTGACCCATAATCTGGGTCTGGGCTCTATGTGCACCGCAGATTTACCATTAGTCG
Ogt_G300_S4	X	[mm10]chrX:101681605-101681665	184	CGATTAGTAGGAAGCTGCCGCAAACACATGCATACACGCCCAAGTACACAAATAGAGCTCATAGGGTCTTTTTTCTTTGACGCAGATTTACCATTAGTCG
Ogt_G300_S4	X	[mm10]chrX:101681990-101682050	185	CGATTAGTAGGAAGCTGCCGGAGGCTCCCTCTTCCCAGATGACTTTAGTTTGTGTTAAGTTGACAGGCTAATTGGAAAAAACGAGATTAGTTCTTTAGCG
Ogt_G300_S4	X	[mm10]chrX:101682053-101682113	186	CGATTAGTAGGAAGCTGCCGTAACTTTGGTCATATTTTGCCACAGAAGTGACTAAGTGTTTATTCGGTCTGGTGCTGAGTACGAGATTAGTTCTTTAGCG
Ogt_G300_S4	X	[mm10]chrX:101682116-101682176	187	CGATTAGTAGGAAGCTGCCGCTGATTTGTAAATTTGGTTCTCTTTGTTTTTACCACCTAGCCTGAAGAAAATTCGTGGCAACGAGATTAGTTCTTTAGCG
Ogt_G300_S4	X	[mm10]chrX:101682179-101682239	188	CGATTAGTAGGAAGCTGCCGTCTGGAAACAGAGAATATCTAGCCCTCTGTTCAACACCAAACAATACACAATGGAATTAGACGAGATTAGTTCTTTAGCG
Ogt_G300_S4	X	[mm10]chrX:101682512-101682572	189	CGATTAGTAGGAAGCTGCCGAGAAATGCTATTCCACAAGGAATCTCTTAGAGTTTTGCAGCAAACAGGTGGTGCACAGGTCGCAGATTTACCATTAGTCG
Ogt_G300_S4	X	[mm10]chrX:101682575-101682635	190	CGATTAGTAGGAAGCTGCCGGAAGGTCTGGTCTCCCTTGGTCTTCCATGGGATGCTTAATGTGGAGGGGAGATAGAGATTCGCAGATTTACCATTAGTCG
Ogt_G300_S4	X	[mm10]chrX:101682638-101682698	191	CGATTAGTAGGAAGCTGCCGCAGCCGTTTTGTGATGCCGTGGATTGATCAAGTCTTCTGATCCTTTTTTTTTTCTTTATACGCAGATTTACCATTAGTCG
Ogt_G300_S4	X	[mm10]chrX:101683001-101683061	193	CGATTAGTAGGAAGCTGCCGCTGCTAACAAACCCATGTCTGCTTTCAGACATCCCAGGGTGTTTCTCTCGAACATGCCATACGAGATTAGTTCTTTAGCG
Ogt_G300_S4	X	[mm10]chrX:101683064-101683124	194	CGATTAGTAGGAAGCTGCCGGTGCCAAATGAAAATTCTTAGGAGTGAATATTAATCATGAAGGTCACAGTTGTGGTACTGACGAGATTAGTTCTTTAGCG
Ogt_G300_S4	X	[mm10]chrX:101683129-101683189	195	CGATTAGTAGGAAGCTGCCGGATAATAATATAGGGTTTTTTTCTGCCTAAGTTTTACCTGTTTCACCAGTGTTTCAGCCCACGAGATTAGTTCTTTAGCG
Ogt_G300_S4	X	[mm10]chrX:101683192-101683252	196	CGATTAGTAGGAAGCTGCCGACTGCCCCTCCTATGCTGCTTCCAAAAGTAATAGTGTGATAAGATTTTTACCTTCCTTTCACGAGATTAGTTCTTTAGCG
Ogt_G300_S4	X	[mm10]chrX:101683531-101683591	197	CGATTAGTAGGAAGCTGCCGTTGGCCCTCGCGGAGCTTGAGTTCTTCATGGTAGAAAACAGTTGCATTTCCGTAAAGGGTCGCAGATTTACCATTAGTCG
Ogt_G300_S4	X	[mm10]chrX:101683594-101683654	198	CGATTAGTAGGAAGCTGCCGGGGCTTGAGGCTTAAATATATGAGTATGTTTATACTGCTCTACTGCACTTAGACTCTCCACGCAGATTTACCATTAGTCG
Ogt_G300_S4	X	[mm10]chrX:101683657-101683717	199	CGATTAGTAGGAAGCTGCCGACAGATAAGTCTTGTCTGTTAGTAGTGCTGTAGATTAAGTCTTTCCAAAGCACCTAGGCACGCAGATTTACCATTAGTCG
Ogt_G300_S4	X	[mm10]chrX:101683720-101683780	200	CGATTAGTAGGAAGCTGCCGCACCTATTCTGTAGTTGCAGCTATTGCCTGAATGTACCTTAGCTGACAAATTATTGATAACGCAGATTTACCATTAGTCG
Ogt_G300_S4	X	[mm10]chrX:101684040-101684100	201	CGATTAGTAGGAAGCTGCCGCGCTGAGGCTGAGATCTGTGGCCATTTACATAGCACATCATTCCTCCTATAGGGATGAACACGAGATTAGTTCTTTAGCG
Ogt_G300_S4	X	[mm10]chrX:101684103-101684163	202	CGATTAGTAGGAAGCTGCCGTTTTCCGACACAAAAAGTAGCCACTGCGGTTAAAGCTTTGCTTATTGTAACAGGCTTTTAACGAGATTAGTTCTTTAGCG
Ogt_G300_S4	X	[mm10]chrX:101684166-101684226	203	CGATTAGTAGGAAGCTGCCGCCAGGTAACCTATCTGTGGAAGACCTAATTCTGAATAGAGTAATAGATATTACTGGAAACACGAGATTAGTTCTTTAGCG
Ogt_G300_S4	X	[mm10]chrX:101684612-101684672	205	CGATTAGTAGGAAGCTGCCGTTAGGTATTTGCAGACAGAACTGTTTTCTATTGTGTACAAACTCAGCCACAACTTTGGCTCGCAGATTTACCATTAGTCG
Ogt_G300_S4	X	[mm10]chrX:101684675-101684735	206	CGATTAGTAGGAAGCTGCCGAGCTTTTTCAGAAACATAAAAGGGAAATATTTGGAACTGGAGAGATTGCATAGCAGTTGGCGCAGATTTACCATTAGTCG
Ogt_G300_S4	X	[mm10]chrX:101684742-101684802	207	CGATTAGTAGGAAGCTGCCGGGGTGCACTTCCGGAGGCCCCAGGTTCGGTTCCCAACATCTACTTGGCAAACTATTCCAGCGCAGATTTACCATTAGTCG
Ogt_G300_S4	X	[mm10]chrX:101684805-101684865	208	CGATTAGTAGGAAGCTGCCGCAGGGGATCTGACACCTCTTTTGGCCTCCTTGGGTATGCACATGGTGAACAGGTGTACATCGCAGATTTACCATTAGTCG
Ogt_G300_S4	X	[mm10]chrX:101685075-101685135	209	CGATTAGTAGGAAGCTGCCGCCAAGACTATACAAAGCCTGGCTTCAGAAAACCAACCCAACCCCTGCAGAGTGGCACTTGACGAGATTAGTTCTTTAGCG
Ogt_G300_S4	X	[mm10]chrX:101685138-101685198	210	CGATTAGTAGGAAGCTGCCGTTTATCCAAGTACTCCAGAGGCAGGAGCAGGCGAAACTTTGTGAGTTTGGGGCTAGCCTGACGAGATTAGTTCTTTAGCG
Ogt_G300_S4	X	[mm10]chrX:101685203-101685263	211	CGATTAGTAGGAAGCTGCCGCAAAACTCCAGGGCAGCTAGGACTGTTACATAGAGAAACTATCTTGAAAACAAGGGAAATACGAGATTAGTTCTTTAGCG
Ogt_G300_S4	X	[mm10]chrX:101690751-101690811	213	CGATTAGTAGGAAGCTGCCGTGAACACCTCATAAGAATTGTGGTGTTTCAAGCCTGTATAGACTCTCAATTTGTAAATGCCGCAGATTTACCATTAGTCG
Ogt_G300_S4	X	[mm10]chrX:101690877-101690937	215	CGATTAGTAGGAAGCTGCCGTTTGCAACTGAAACCTAATTTCAAAGCAAAGTGAGGGCACAATGATAGTGTGATATTCACCGCAGATTTACCATTAGTCG
Ogt_G300_S4	X	[mm10]chrX:101690940-101691000	216	CGATTAGTAGGAAGCTGCCGGCTGGCAGTCAGCCCAGTTGGCTGTCCTCAGTAACCCTACACCCTTTTGCATGAATAGTGCGCAGATTTACCATTAGTCG
Ogt_G300_S4	X	[mm10]chrX:101691388-101691448	217	CGATTAGTAGGAAGCTGCCGTGGGTGGGTCAAAATTTAGCCAAATGTGACTGACTCTTTAAGACTGATTTTAACATGTTCACGAGATTAGTTCTTTAGCG
Ogt_G300_S4	X	[mm10]chrX:101691514-101691574	219	CGATTAGTAGGAAGCTGCCGAATTTCATGCTATCAAAAGGTGATGTTCACTTTAATCCTGTTTGCCTTCACGCCACTGTCACGAGATTAGTTCTTTAGCG
Ogt_G300_S4	X	[mm10]chrX:101691577-101691637	220	CGATTAGTAGGAAGCTGCCGAGCCTTCATTCCAGGCCACATAGACAAACAGGGCCAGAACCACATGAACAGCAACAACAGACGAGATTAGTTCTTTAGCG
Ogt_G300_S4	X	[mm10]chrX:101691948-101692008	221	CGATTAGTAGGAAGCTGCCGTTTATTGTACCTCCAAAGCCCTAACATGGATTCGTTTGTTAGAATCTGGGTACTGTGAGTCGCAGATTTACCATTAGTCG
Ogt_G300_S4	X	[mm10]chrX:101692011-101692071	222	CGATTAGTAGGAAGCTGCCGAATGATTAGTAGTCTCGGGATCTGTATTCTGACTCACAACTATAAAATCCCAGCACTGGGCGCAGATTTACCATTAGTCG
Ogt_G300_S4	X	[mm10]chrX:101692078-101692138	223	CGATTAGTAGGAAGCTGCCGGACAGGAGAATTACCAGAGGTTCAAGGACATCCCAGGTTAAATAGTGAAAGCCTGTCTTACGCAGATTTACCATTAGTCG
Ogt_G300_S4	X	[mm10]chrX:101692141-101692201	224	CGATTAGTAGGAAGCTGCCGAAATAAGATGGTATGGGAGGAGTGGTTGGCTTCCTCGTTAGTTATACAGTGGTGGGATGACGCAGATTTACCATTAGTCG
Ogt_G300_S4	X	[mm10]chrX:101692499-101692559	225	CGATTAGTAGGAAGCTGCCGCTACATAACCCTGGCTGGTTTCAAACTTAACCTTTTGCTTCAACTTCTGAGTCCTGGAATACGAGATTAGTTCTTTAGCG
Ogt_G300_S4	X	[mm10]chrX:101692562-101692622	226	CGATTAGTAGGAAGCTGCCGAGGTATGTGCCACCATACCTGGCTGAGAGTTAAAAATTTGACTCCTAACTTATTTGAAATACGAGATTAGTTCTTTAGCG
Ogt_G300_S4	X	[mm10]chrX:101692688-101692748	228	CGATTAGTAGGAAGCTGCCGAAGTGCTGGGAAGTATAGGTATGTATTACCACAGGCAGCTTACGTTTTTCTTTATATATGACGAGATTAGTTCTTTAGCG
Ogt_G300_S4	X	[mm10]chrX:101692974-101693034	229	CGATTAGTAGGAAGCTGCCGGAGTCTTTTCTCATCACAACTCCTACCAGAAGCCCTCAATTGTGGAGCACTGCATACACTCGCAGATTTACCATTAGTCG
Ogt_G300_S4	X	[mm10]chrX:101693037-101693097	230	CGATTAGTAGGAAGCTGCCGGCATCCTTATCACAAGTTTTAAGTTTTCTTTGACAGCTTCCTGTGTAGACTGTTACTTTCCGCAGATTTACCATTAGTCG
Ogt_G300_S4	X	[mm10]chrX:101693100-101693160	231	CGATTAGTAGGAAGCTGCCGGAGTGTGGTGGGATAGAGTGGTTTCTTATACCTACCATTGACCAAGCCAGCTCAGTCAGTCGCAGATTTACCATTAGTCG
Ogt_G300_S4	X	[mm10]chrX:101693166-101693226	232	CGATTAGTAGGAAGCTGCCGGGCCTCGAGCGCAGGAATGAGGATTGAAAAGAAAAAGACAATTAGACAACATTATAAAATCGCAGATTTACCATTAGTCG
Ogt_G300_S4	X	[mm10]chrX:101693488-101693548	233	CGATTAGTAGGAAGCTGCCGATATTCTTATCTGAGACTACTTCTTCCTCCAGAGCCCAGTGATAAGTACTTGCCAAATTTACGAGATTAGTTCTTTAGCG
Ogt_G300_S4	X	[mm10]chrX:101693551-101693611	234	CGATTAGTAGGAAGCTGCCGTAAGCAGCAAATTGCTATAAGCGGCACCACATACCATTTAGATTCTTAGCTTATACTTCTACGAGATTAGTTCTTTAGCG
Ogt_G300_S4	X	[mm10]chrX:101693618-101693678	235	CGATTAGTAGGAAGCTGCCGATAGTCAAGGAATCTCCATTTTGATGGAGAAGGGAGAAAGTTACCCATTTATTAGTTCAGACGAGATTAGTTCTTTAGCG
Ogt_G300_S4	X	[mm10]chrX:101693681-101693741	236	CGATTAGTAGGAAGCTGCCGGCTATTCATTCGTTGGCAATTCAGTAAGGAATAGTACAGCTTGGAACTAGCGCTGTTAAAACGAGATTAGTTCTTTAGCG
Ogt_G300_S4	X	[mm10]chrX:101694039-101694099	237	CGATTAGTAGGAAGCTGCCGAGATATACGCATGGTGTATGTATCTGTGTGTGTGGAGGCCACAAATTACTCTCCATCTTTCGCAGATTTACCATTAGTCG
Ogt_G300_S4	X	[mm10]chrX:101694102-101694162	238	CGATTAGTAGGAAGCTGCCGGGTCACTGTTTTGATTTTCCCTCCTGCCCCACCCCCCATCTCCAAGCACTGAGATTAAAGCGCAGATTTACCATTAGTCG
Ogt_G300_S4	X	[mm10]chrX:101694165-101694225	239	CGATTAGTAGGAAGCTGCCGTCCCTGGACTTGGGGTCTGAATTTCTATGTTCATGCTTGTTCAATGAGCATTTTAATTGCCGCAGATTTACCATTAGTCG
Ogt_G300_S4	X	[mm10]chrX:101694228-101694288	240	CGATTAGTAGGAAGCTGCCGACCATCTTCCCTGACCCTAACATTGAATCTTTAATTCTTTAGAAACAAGACGACTTTTGCCGCAGATTTACCATTAGTCG
Ogt_G300_S4	X	[mm10]chrX:101694628-101694688	241	CGATTAGTAGGAAGCTGCCGATTAAACCCAGGTCCTCTGTAAGAACAAGTGCTCTCAACCACGGAAATAAACATCTCTCCACGAGATTAGTTCTTTAGCG
Ogt_G300_S4	X	[mm10]chrX:101694691-101694751	242	CGATTAGTAGGAAGCTGCCGCCCTCACCTACTTTTTTCTTTCCCGAGACAGGTTTCACTATGTGGCTGTTCTGGAACTCAACGAGATTAGTTCTTTAGCG
Ogt_G300_S4	X	[mm10]chrX:101694754-101694814	243	CGATTAGTAGGAAGCTGCCGTGCAGACTCAATAGAGTCTGCCTCCCTCTACTTCTCAAATCCTGGAATTAAGGCTTAAAGACGAGATTAGTTCTTTAGCG
Ogt_G300_S4	X	[mm10]chrX:101694817-101694877	244	CGATTAGTAGGAAGCTGCCGTGCACCACCATGCCTAGCCCCTCAATTTTAAGCCCACACAGAACACCTAGAACAATACGTACGAGATTAGTTCTTTAGCG
Ogt_G300_S4	X	[mm10]chrX:101695085-101695145	245	CGATTAGTAGGAAGCTGCCGCCATAGTTCTTTGTCGCTAGATGTTTTTCCGTTGCTCCTCCTTTCTCTCATCTAGGGGTCCGCAGATTTACCATTAGTCG
Ogt_G300_S4	X	[mm10]chrX:101695148-101695208	246	CGATTAGTAGGAAGCTGCCGATAGTCCTTTTCTGCAAGTGCTTACGGTAGACTAGGTAGACGAACTTTGTAAACATTTGGCGCAGATTTACCATTAGTCG
Ogt_G300_S4	X	[mm10]chrX:101695211-101695271	247	CGATTAGTAGGAAGCTGCCGTTCAAGCAAGGTAGGTCACAAGGCTTGGTGGTGCATGCCTTTAATCCCAGCACTTGGGAGCGCAGATTTACCATTAGTCG
Ogt_G300_S4	X	[mm10]chrX:101695632-101695692	249	CGATTAGTAGGAAGCTGCCGTTCAAATGGCGCACTTCAGTGCGGTGCAGTGATATCCAGTACCAGAAACACTGGAGTTGGACGAGATTAGTTCTTTAGCG
Ogt_G300_S4	X	[mm10]chrX:101695695-101695755	250	CGATTAGTAGGAAGCTGCCGCACAAATTCATAATTCTAGAATTCAAATTTGCCTTATGATCATGCGTGGTAGGTGGGGGCACGAGATTAGTTCTTTAGCG
Ogt_G300_S4	X	[mm10]chrX:101695758-101695818	251	CGATTAGTAGGAAGCTGCCGAAAGGCGGGAACACGTCAGTTCCCATGGTCCCTGGGGGCACTGCCCTATAAAAGGCGCGGACGAGATTAGTTCTTTAGCG
Ogt_G300_S4	X	[mm10]chrX:101695821-101695881	252	CGATTAGTAGGAAGCTGCCGGCGCGCGCCCATTTTAGACCGCTCGGGGAGCCGTTGGCGGTTGAGACCTTCTGCCAGGCCACGAGATTAGTTCTTTAGCG
Ogt_G300_S4	X	[mm10]chrX:101696122-101696182	253	CGATTAGTAGGAAGCTGCCGCAGAGAGTCTCGAGACGGTCGTGAGGATGCTGGGGCGGACAGGGCTGATGGCGGACTGGTCGCAGATTTACCATTAGTCG
Ogt_G300_S4	X	[mm10]chrX:101696185-101696245	254	CGATTAGTAGGAAGCTGCCGCGCCGGAGTGAGGTGGTTTTGAGACTTGAGACGACGGTCGTGAGGATGGGGGGCGGACAGCGCAGATTTACCATTAGTCG
Ogt_G300_S4	X	[mm10]chrX:101696248-101696308	255	CGATTAGTAGGAAGCTGCCGTGATGGCAGACTGGTAGACGCCCGAGTTGGGGTGGTTTTTGAGACTTGAGACGACGGTCGCGCAGATTTACCATTAGTCG
Ogt_G300_S4	X	[mm10]chrX:101696311-101696371	256	CGATTAGTAGGAAGCTGCCGGGATGGGGGGCGGACAGGGCTGATGGCGGACTGGTAGACGCCGGAGTGAGGTGGTTTTGACGCAGATTTACCATTAGTCG
Ogt_G300_S4	X	[mm10]chrX:101696721-101696781	257	CGATTAGTAGGAAGCTGCCGGGATGGGGGGCGGACAGGGCTGATGGCGGACTGGTAGACGCCGGAGTGAGGTGGTTTTGAACGAGATTAGTTCTTTAGCG
Ogt_G300_S4	X	[mm10]chrX:101696785-101696845	258	CGATTAGTAGGAAGCTGCCGTGAGACGACGGTCGTGAGGATGTGGGGGCGGACAGGGCCGATGGCGGCACTCGAGTGGGGACGAGATTAGTTCTTTAGCG
Ogt_G300_S4	X	[mm10]chrX:101696848-101696908	259	CGATTAGTAGGAAGCTGCCGTTTTGAGAAGGGCATGAGGAAGTGGGGGTGCGGCGGCAGGGCCCATAGACTCTTGAGTCTACGAGATTAGTTCTTTAGCG
Ogt_G300_S4	X	[mm10]chrX:101696911-101696971	260	CGATTAGTAGGAAGCTGCCGGATGGTCGTGGGGTTGCGGGGGCAGACATGGCCGATGGCCGTCGGTTACTCGGCGGAGGAACGAGATTAGTTCTTTAGCG
Ogt_G300_S4	X	[mm10]chrX:101697268-101697328	261	CGATTAGTAGGAAGCTGCCGGGGCGGGACACGGGCGCCGGAAAAAGCCGAGGGGGGGGCGGGACACGGGCGCGGGAAAAACGCAGATTTACCATTAGTCG
Ogt_G300_S4	X	[mm10]chrX:101697331-101697391	262	CGATTAGTAGGAAGCTGCCGAAGGGGGGTTGGGACACAGGCGCGGGAAAAAGCCGAGGAGGGGCGGGACACGGGCGCCGGCGCAGATTTACCATTAGTCG
Ogt_G300_S4	X	[mm10]chrX:101697394-101697454	263	CGATTAGTAGGAAGCTGCCGAAGCCGAGGGGGGGAGGCGCCGGAAAAAGCCGAGGGGTGTCGGGACACGAGTGGCAGAAACGCAGATTTACCATTAGTCG
Ogt_G300_S4	X	[mm10]chrX:101697459-101697519	264	CGATTAGTAGGAAGCTGCCGGAAGAGGGTGGGACACGCGACGGAAAAGCCTTGGGGTGGCGGGACGCGGGCGCGGGCGCGCGCAGATTTACCATTAGTCG
Ogt_G300_S4	X	[mm10]chrX:101697821-101697881	265	CGATTAGTAGGAAGCTGCCGAAAAGCCGAGGGGGGTGCTCGGGACACGAGCGCGGGAAAAAGCCGAGGGGGGGGCGCGGGACGAGATTAGTTCTTTAGCG
Ogt_G300_S4	X	[mm10]chrX:101697888-101697948	266	CGATTAGTAGGAAGCTGCCGGAAAGCCGAGGGGTGTCGGGACACAGGCGCCGGAAAAAGCCGAGGGGTTCCGCGGGACACACGAGATTAGTTCTTTAGCG
Ogt_G300_S4	X	[mm10]chrX:101697952-101698012	267	CGATTAGTAGGAAGCTGCCGGACGGAAAAAGCCGAGGCGGGTGGGACACGCGACGGAAAAGGCCGAGTCTGGGACAGGGAACGAGATTAGTTCTTTAGCG
Ogt_G300_S4	X	[mm10]chrX:101698015-101698075	268	CGATTAGTAGGAAGCTGCCGCGGTGGCTTGGAACCTAGTCTTGTGCCTAGTCTTAGCATGCCTTGGAAGAATGGTGCATCACGAGATTAGTTCTTTAGCG
Ogt_G300_S4	X	[mm10]chrX:101698373-101698433	269	CGATTAGTAGGAAGCTGCCGATGTTGGAGAAGCCCGAGGTCTGCGCAGCCAATGGGAAGCCGTGGAGACAGAGCGGGCCACGCAGATTTACCATTAGTCG
Ogt_G300_S4	X	[mm10]chrX:101698436-101698496	270	CGATTAGTAGGAAGCTGCCGCGCAGTAAGAGGGGCTGTCGCGAGGCCTCCTGTGGCTCCCTCTTGCGGCGGGTCCCGGAGCGCAGATTTACCATTAGTCG
Ogt_G300_S4	X	[mm10]chrX:101698499-101698559	271	CGATTAGTAGGAAGCTGCCGCTCGCTCGTTGAGGCTAGGCCAGACTAGAGTGAGCTCAGAAAGACTCCCCCCCTCCCCCGCGCAGATTTACCATTAGTCG
Ogt_G300_S4	X	[mm10]chrX:101698562-101698622	272	CGATTAGTAGGAAGCTGCCGCGGATCCAGCCAGTCTGAGCTGCAGCTAGATCGAGTTCGGCTGCAGGGGTGACTTCAGCTCGCAGATTTACCATTAGTCG
Ogt_G300_S4	X	[mm10]chrX:101698998-101699058	273	CGATTAGTAGGAAGCTGCCGCAAAAAGTAAATATTTGGGGGATTTTTTGGGGGAGAGTCTCTCTAACACAGCTGGACCAGACGAGATTAGTTCTTTAGCG
Ogt_G300_S4	X	[mm10]chrX:101699061-101699121	274	CGATTAGTAGGAAGCTGCCGTTCATTATAAAGTCTATGCTGGGCCCAAATTCTTAGGGATCCTCTTGCATCAGATTTCCAACGAGATTAGTTCTTTAGCG
Ogt_G300_S4	X	[mm10]chrX:101699124-101699184	275	CGATTAGTAGGAAGCTGCCGTCTGAGATGACAGCATGCAACACCACACTCACCTTTTTTAAAAGAGTAAATTATAGGGGTACGAGATTAGTTCTTTAGCG
Ogt_G300_S4	X	[mm10]chrX:101699191-101699251	276	CGATTAGTAGGAAGCTGCCGTAGCTCAGTTGATAAGAGTATCTGCCTACTCTGCATCAAACCCTGGGTTCAGTCACCAGCACGAGATTAGTTCTTTAGCG
Ogt_G300_S4	X	[mm10]chrX:101699496-101699556	277	CGATTAGTAGGAAGCTGCCGCCCGACATTGATACCTTATGGACTATGTTGTTGGTAGCCCTCATTTTAAAAATCTCTTTTCGCAGATTTACCATTAGTCG
Ogt_G300_S4	X	[mm10]chrX:101699559-101699619	278	CGATTAGTAGGAAGCTGCCGCTCTCTAGTTATTTTCTGAACATGGATTCAGGCAGCAGCAGCAGCAGCAGTAGCAGTGGCCGCAGATTTACCATTAGTCG
Ogt_G300_S4	X	[mm10]chrX:101699622-101699682	279	CGATTAGTAGGAAGCTGCCGAGCAGTGGCAGCTGCAGCACCAGTGGCAGTGGCAGCACCAGTGGCAGCAGCACCACCAGCCGCAGATTTACCATTAGTCG
Ogt_G300_S4	X	[mm10]chrX:101699685-101699745	280	CGATTAGTAGGAAGCTGCCGAGCAGCAGCAGCAGCAGCAGCAGCAGCAGCAGCAGCAGCAGCAGCAGTAAAGAATGTGAGCGCAGATTTACCATTAGTCG
Ogt_G300_S4	X	[mm10]chrX:101700591-101700651	281	CGATTAGTAGGAAGCTGCCGCAGCTTCGTTCCCTGCTTTAAAGAGCAGGGGAAGATCTTCATGTTTCCCTTTTGTGTTGTACGAGATTAGTTCTTTAGCG
Ogt_G300_S4	X	[mm10]chrX:101700654-101700714	282	CGATTAGTAGGAAGCTGCCGCCTCTTTTTGGTTCCTGGATCTTCTTTTATTTCCTCTCTGTCTTTCATGTCTTTCATTCTACGAGATTAGTTCTTTAGCG
Ogt_G300_S4	X	[mm10]chrX:101700717-101700777	283	CGATTAGTAGGAAGCTGCCGGTCTCTTCTATTTCCATCCCCCCTTTGTCTATTTATTGCTGGACATAGAGTCTAAGGTAAACGAGATTAGTTCTTTAGCG
Ogt_G300_S4	X	[mm10]chrX:101700780-101700840	284	CGATTAGTAGGAAGCTGCCGAGTACTCTACAACTGACCTATGTCCCCAGTCTTAGGGAAACTTAAATTTGACTAGCACTAACGAGATTAGTTCTTTAGCG
Ogt_G300_S4	X	[mm10]chrX:101701139-101701199	285	CGATTAGTAGGAAGCTGCCGGCTTGGCTAGTTTTTGGCTTTTTGAGTCTGGGTCTCACTATGTAGCTCAGATTGGAACTACGCAGATTTACCATTAGTCG
Ogt_G300_S4	X	[mm10]chrX:101701206-101701266	286	CGATTAGTAGGAAGCTGCCGAGATAAGGTTGCATTTGAACTTGTAGCATCTGCTTAAGTGCTAAGATTATAGGCATACACCGCAGATTTACCATTAGTCG
Ogt_G300_S4	X	[mm10]chrX:101701332-101701392	288	CGATTAGTAGGAAGCTGCCGAGTAGACATTTTTTCCTCTGATCTTGTCTTCTGTGATCCTGCCTCCAGGTGATCTCATGACGCAGATTTACCATTAGTCG
Ogt_G300_S4	X	[mm10]chrX:101701674-101701734	289	CGATTAGTAGGAAGCTGCCGGGATTAAAGGCATGTGCCACCATGCCAACCAAGAAGACTTAAAAAAATGGTTTCTTTATTACGAGATTAGTTCTTTAGCG
Ogt_G300_S4	X	[mm10]chrX:101701737-101701797	290	CGATTAGTAGGAAGCTGCCGTGTATATAAGCATTTACCTACTTTTATGTATGTGCGCTTAGTACCTGTGAAGGCTAGGAGACGAGATTAGTTCTTTAGCG
Ogt_G300_S4	X	[mm10]chrX:101701800-101701860	291	CGATTAGTAGGAAGCTGCCGTATTGGACACCCTGAAACCAGAGTTATAAACCAATTATAAGCTACCATGTGGGTTCTAAGACGAGATTAGTTCTTTAGCG
Ogt_G300_S4	X	[mm10]chrX:101701863-101701923	292	CGATTAGTAGGAAGCTGCCGCAAACTAGGGTCCTCTGCAAGAGGAGCAAGTGTGGGCTGGAGAGATGGCTTAGTGGTTAAACGAGATTAGTTCTTTAGCG
Ogt_G300_S4	X	[mm10]chrX:101702316-101702376	294	CGATTAGTAGGAAGCTGCCGAACTAAAAAAAAAGGAACAGCAAGTGTTCTTAATTGCTTAGCTATCTCTCCAGCCCATAGCGCAGATTTACCATTAGTCG
Ogt_G300_S4	X	[mm10]chrX:101702379-101702439	295	CGATTAGTAGGAAGCTGCCGACAGACTCTGTTTGTTTGTTTGTGTCTGAGACAGGGCCTTTCTAAGTAGCCTGGCTATCCCGCAGATTTACCATTAGTCG
Ogt_G300_S4	X	[mm10]chrX:101702445-101702505	296	CGATTAGTAGGAAGCTGCCGTTCCTTTGTAAACTAAACTGGCCTTGAACTTACAGAGATCTGCTTCCTGAATGCTGCAATCGCAGATTTACCATTAGTCG
Ogt_G300_S4	X	[mm10]chrX:101702895-101702955	297	CGATTAGTAGGAAGCTGCCGTCCCTCCAGCCCTTGAATGTTTATATTGTAGTGTTTATTAATATGTGATCTTGGTGATGCACGAGATTAGTTCTTTAGCG
Ogt_G300_S4	X	[mm10]chrX:101702961-101703021	298	CGATTAGTAGGAAGCTGCCGGAGGAAAGGTTGTGGCTTAACAGTGATATGTTTGTGTCAAGTTGACACAAGGGGTCAGAGACGAGATTAGTTCTTTAGCG
Ogt_G300_S4	X	[mm10]chrX:101703024-101703084	299	CGATTAGTAGGAAGCTGCCGGAACCTTTCCTTTGTGACTCTGCACTCTTATACAAATGTGTCTCAAAGTTGATGAAAATGACGAGATTAGTTCTTTAGCG
Ogt_G300_S4	X	[mm10]chrX:101703087-101703147	300	CGATTAGTAGGAAGCTGCCGATCCTCCTGATGAGTTTTTCACTTCCACCACAACTATTTGAGTACTGGCACTCTGACAAGACGAGATTAGTTCTTTAGCG
Ogt_G300_S4	X	[mm10]chrX:101703445-101703505	301	CGATTAGTAGGAAGCTGCCGGAAAAGAACACTACAGTCTGTGAAATAAGCAGTGGAGGCAAGTATCATCTCTGTTTAGAGCGCAGATTTACCATTAGTCG
Ogt_G300_S4	X	[mm10]chrX:101703508-101703568	302	CGATTAGTAGGAAGCTGCCGCAACTGAGCTCTGAAGCCTTATTACATGTGGTAGTTTTAGAATCAGATTCTGCAAACTTTCGCAGATTTACCATTAGTCG
Ogt_G300_S4	X	[mm10]chrX:101703571-101703631	303	CGATTAGTAGGAAGCTGCCGTTTCTTATGCTTTCATATCCAGTGCCACCATTTCTTTCTCCATCAAGTATTGGATGTTGACGCAGATTTACCATTAGTCG
Ogt_G300_S4	X	[mm10]chrX:101703634-101703694	304	CGATTAGTAGGAAGCTGCCGGGCTGGGTCCCTACACCTTGGTTTATTTCCTAACACAGTTGCCACTCTTTCTGCTGCCTTCGCAGATTTACCATTAGTCG
Ogt_G300_S4	X	[mm10]chrX:101704000-101704060	305	CGATTAGTAGGAAGCTGCCGGGACCACAAGGCAGCAGATTTGTCTTTAGGAACAACTGAGCTCATGCTGTTTAGACAGGTACGAGATTAGTTCTTTAGCG
Ogt_G300_S4	X	[mm10]chrX:101704130-101704190	307	CGATTAGTAGGAAGCTGCCGGGGGGGAAACAATCTACAACTGATTTTTAATTGTGATTTAGAATGTCCAAGTACTCAACCACGAGATTAGTTCTTTAGCG
Ogt_G300_S4	X	[mm10]chrX:101704193-101704253	308	CGATTAGTAGGAAGCTGCCGTTTAGTTTAATTTGTGCTCAATATCCTGCCGATGTCTGTATATAGAGTGAACAGGAGTGTACGAGATTAGTTCTTTAGCG
Ogt_G300_S4	X	[mm10]chrX:101704494-101704554	309	CGATTAGTAGGAAGCTGCCGAACCAGACATCAAGTGAGCTTGAGCCAGAGGGGGAGCCTGAATCAGAGGCCAAGGGGGAGCGCAGATTTACCATTAGTCG
Ogt_G300_S4	X	[mm10]chrX:101704557-101704617	310	CGATTAGTAGGAAGCTGCCGGAATCAGAGGCCAAGGGGGAGCCCGAATCTGAGGCCAAGGGGGAGCCCGAATCTGAGGCCCGCAGATTTACCATTAGTCG
Ogt_G300_S4	X	[mm10]chrX:101704624-101704684	311	CGATTAGTAGGAAGCTGCCGAGTCCGAATCTGAAGCCAAGGGGGAGATGGAGACTGAGGCCAAGGGGGAGTCCGAATCTGCGCAGATTTACCATTAGTCG
Ogt_G300_S4	X	[mm10]chrX:101704690-101704750	312	CGATTAGTAGGAAGCTGCCGAGGGGGAGATGGAGACTGAGGCCAAGGGGGAGTCCGAATCTGAAGCCAAGGGGGAGATGGCGCAGATTTACCATTAGTCG
Ogt_G300_S4	X	[mm10]chrX:101705045-101705105	313	CGATTAGTAGGAAGCTGCCGGGCTGCTAAGGGGGAGATGGAGACTGAGGCTGCTATGGGGGAGGTGGAGACTGAGGCTGCACGAGATTAGTTCTTTAGCG
Ogt_G300_S4	X	[mm10]chrX:101705108-101705168	314	CGATTAGTAGGAAGCTGCCGGGGGGAGCCCGAGCAAGAAATTACAGCTGAGGAAGCCAAAAAGAAAAGGGCTGCATATCTACGAGATTAGTTCTTTAGCG
Ogt_G300_S4	X	[mm10]chrX:101705171-101705231	315	CGATTAGTAGGAAGCTGCCGGGCACAACAAAGGAAAAGAAAGAGAAAGAACAGATTCATATGTATGTCATCAAGTAAGCCACGAGATTAGTTCTTTAGCG
Ogt_G300_S4	X	[mm10]chrX:101705234-101705294	316	CGATTAGTAGGAAGCTGCCGTAGGAAACGCCGTAGGGCTGACCCACAGGATGGGGCTGACCCACAGGATGGGGCTGACCCACGAGATTAGTTCTTTAGCG
Ogt_G300_S4	X	[mm10]chrX:101705529-101705589	317	CGATTAGTAGGAAGCTGCCGGGGCCTTTTTGCAAATTGCCACTGGTTAGGGAGCGCCACTGTCCATTTTCCTTATGTTCCCGCAGATTTACCATTAGTCG
Ogt_G300_S4	X	[mm10]chrX:101705592-101705652	318	CGATTAGTAGGAAGCTGCCGATATCAGCATTCCCCAATGTTCAATCCCCCTGCAGTGTTTGTTTCTTTTTCTTTTTCTTTCGCAGATTTACCATTAGTCG
Ogt_G300_S4	X	[mm10]chrX:101705718-101705778	320	CGATTAGTAGGAAGCTGCCGTGGAACTGGCTTATAAAGCAGGCTAGCCTCAAACTCATATTCACCTACCTTTTCTTCCCACGCAGATTTACCATTAGTCG
Ogt_G300_S4	X	[mm10]chrX:101706114-101706174	321	CGATTAGTAGGAAGCTGCCGGACTAAAGGTGTGTACCACCACCGCCTGGCATAACAAATGTTTGATAAACTTGTTAAATAACGAGATTAGTTCTTTAGCG
Ogt_G300_S4	X	[mm10]chrX:101706177-101706237	322	CGATTAGTAGGAAGCTGCCGGGCGCTTAACTGTTGGTTCCAAAGTCTCTGGTTGAAGTTATTGGTACTGTGGGTCTTGGAACGAGATTAGTTCTTTAGCG
Ogt_G300_S4	X	[mm10]chrX:101706240-101706300	323	CGATTAGTAGGAAGCTGCCGAGGCAAAAAAGACTAGGTTTGACTTAGAAATTGAGTGAAGGTGCTGCTGGGGATATGGACACGAGATTAGTTCTTTAGCG
Ogt_G300_S4	X	[mm10]chrX:101706303-101706363	324	CGATTAGTAGGAAGCTGCCGACTAGCCTCGTGGATAGTTAGTTGATCCATGAGGGCAAAGGGCCTGGGGGTGGGGTTCAGACGAGATTAGTTCTTTAGCG
Ogt_G300_S4	X	[mm10]chrX:101706681-101706741	325	CGATTAGTAGGAAGCTGCCGCCCTGCCAGTGAAGGGAGTCCTCCAGATTGCCCCGAGCTTGGAGGCTTATCTAGTCAAGGCGCAGATTTACCATTAGTCG
Ogt_G300_S4	X	[mm10]chrX:101706744-101706804	326	CGATTAGTAGGAAGCTGCCGACTTTGACCTTAGAGTTTCCCACCCTATACCAATCTTTAGACTGCACTTGTCTTAGATGCCGCAGATTTACCATTAGTCG
Ogt_G300_S4	X	[mm10]chrX:101706807-101706867	327	CGATTAGTAGGAAGCTGCCGGGCAACCTAGCCTCCAAGAACCCTTATGAAAATTCTCTGTACCTGTGACAGTCTTACTGGCGCAGATTTACCATTAGTCG
Ogt_G300_S4	X	[mm10]chrX:101706870-101706930	328	CGATTAGTAGGAAGCTGCCGCCCTAGATGGAGCCATTCAGAAGGTAGCAGTATGCAGCCTGCCCATGCAGTCTTGTTGATCGCAGATTTACCATTAGTCG
Ogt_G300_S4	X	[mm10]chrX:101707228-101707288	329	CGATTAGTAGGAAGCTGCCGCCAAAGTGGGGATGCACATGCAGAGTAATGAGGTCACCTCCTGGTTCCCCTCCTTTCTCTACGAGATTAGTTCTTTAGCG
Ogt_G300_S4	X	[mm10]chrX:101707291-101707351	330	CGATTAGTAGGAAGCTGCCGTCTAGCCATCCAGCCAAAGTGCCAAGCCTTTGTGCTCTCCTTAAATCCTAGTAGTTAACTACGAGATTAGTTCTTTAGCG
Ogt_G300_S4	X	[mm10]chrX:101707354-101707414	331	CGATTAGTAGGAAGCTGCCGAGAGTGCTCCTTCAAACTCAGAGCAGCTCTGGCTTCTGTCCTTAAACTCAGGTCAAAGATACGAGATTAGTTCTTTAGCG
Ogt_G300_S4	X	[mm10]chrX:101707417-101707477	332	CGATTAGTAGGAAGCTGCCGTATGTGGCCAAGATAACTTTAGGTTTGACATAGCCTAGTTTACACTGATGTAAGCCAACAACGAGATTAGTTCTTTAGCG
Ogt_G300_S4	X	[mm10]chrX:101707775-101707835	333	CGATTAGTAGGAAGCTGCCGAGAACCCTTGGCCTTGAACATGCTGGCAAGCATTCTGCCACTGGGCCACATCCATGCTATCGCAGATTTACCATTAGTCG
Ogt_G300_S4	X	[mm10]chrX:101707838-101707898	334	CGATTAGTAGGAAGCTGCCGGTGAATTTTCAAAGCATCACAGACTCAGGAAAAAAGTGTTAGGGTGAGGTAGATGGCTTGCGCAGATTTACCATTAGTCG
Ogt_G300_S4	X	[mm10]chrX:101707901-101707961	335	CGATTAGTAGGAAGCTGCCGTGCTTTCATTTTCATTAAGCTATAGGGAGCTATCGGAAACAAGTGATTGCATAGGCCAAACGCAGATTTACCATTAGTCG
Ogt_G300_S4	X	[mm10]chrX:101707968-101708028	336	CGATTAGTAGGAAGCTGCCGTATACTCCAGCTAGAGGTCAATTCATTTTCCCATTTAGGTTCTAAAATCTCATTTTCCCCCGCAGATTTACCATTAGTCG
Ogt_G300_S4	X	[mm10]chrX:101708989-101709049	337	CGATTAGTAGGAAGCTGCCGCCTGTCCCCATCCTTACTCATTCTGCTCAGCACTGGCAGGTGTGCAGTGGATGGCTCTGCACGAGATTAGTTCTTTAGCG
Ogt_G300_S4	X	[mm10]chrX:101709052-101709112	338	CGATTAGTAGGAAGCTGCCGCTGGGGCCCTGCCTCCTCTTCTGTGTCTCCTTCCTTGGAGGCAGCACTAGCCTTTGCCTCACGAGATTAGTTCTTTAGCG
Ogt_G300_S4	X	[mm10]chrX:101709115-101709175	339	CGATTAGTAGGAAGCTGCCGGGCCTGGGGCTCTTGGCTCTCAGGGGCAGCGGCCTTCCCTTCTTGGGCAGTGCCCTCATCACGAGATTAGTTCTTTAGCG
Ogt_G300_S4	X	[mm10]chrX:101709182-101709242	340	CGATTAGTAGGAAGCTGCCGGCGCTGAGATCCCCCTGCTCCTGCTCTTCCTCTGTTGGCGAGGAGGCTGAAGAATCATCCACGAGATTAGTTCTTTAGCG
Ogt_G300_S4	X	[mm10]chrX:101709494-101709554	341	CGATTAGTAGGAAGCTGCCGTTCGCTGGGGAAGGCTGCCCATGATGGAGGTCTGCTGGGGGCGCCTGGAGCCGACTGGCGCGCAGATTTACCATTAGTCG
Ogt_G300_S4	X	[mm10]chrX:101709557-101709617	342	CGATTAGTAGGAAGCTGCCGGCGCTGCAGGGGATAGTTCGGCTGGGACGGCCCAGCGAGCAGAGGGGTGGGGCTGTGTCCCGCAGATTTACCATTAGTCG
Ogt_G300_S4	X	[mm10]chrX:101709620-101709680	343	CGATTAGTAGGAAGCTGCCGAGGGAGAGGCACGGGGGACGGGGAGGGGGGGGGGCAAGCGCGCTGCAACCCCCCCAACCCCGCAGATTTACCATTAGTCG
Ogt_G300_S4	X	[mm10]chrX:101709683-101709743	344	CGATTAGTAGGAAGCTGCCGCCCCCCCCACAGCCGACCCACTGCTGCTGCGCTCCATGCCAGAATCACATCTGGAGGGTTCGCAGATTTACCATTAGTCG
Ogt_G300_S4	X	[mm10]chrX:101716290-101716350	346	CGATTAGTAGGAAGCTGCCGGCAAGGTACCTCGGGGCTCGACTCAAGGTTGTATTTTTAGAGAAAAAATATTTTCAGGGAACGAGATTAGTTCTTTAGCG
Ogt_G300_S4	X	[mm10]chrX:101716353-101716413	347	CGATTAGTAGGAAGCTGCCGAAAGGGAAAAAGTGATGTGTCAGTTGTGGGGTAGGGGAGATGAGCTTAGAGCTGAGAGAAACGAGATTAGTTCTTTAGCG
Ogt_G300_S4	X	[mm10]chrX:101716416-101716476	348	CGATTAGTAGGAAGCTGCCGCTCGGTGTCCCTGTGCTTTTTGCCCACTAAGAAGAAAGAAGCAGCTCATCATGTGCTCCCACGAGATTAGTTCTTTAGCG
Ogt_G300_S4	X	[mm10]chrX:101716775-101716835	349	CGATTAGTAGGAAGCTGCCGTTTAATGTGGGGTCCATAGGCTTTGAGGGAATGTTTGCTACACCCTGAGGCTAGCCTTTTCGCAGATTTACCATTAGTCG
Ogt_G300_S4	X	[mm10]chrX:101716838-101716898	350	CGATTAGTAGGAAGCTGCCGATTATACACTGAGGTCCCACTCTCTGCTGAAGTTGGCAGATAGTATAGGTTTTCATCTGCCGCAGATTTACCATTAGTCG
Ogt_G300_S4	X	[mm10]chrX:101716905-101716965	351	CGATTAGTAGGAAGCTGCCGGCTGATACATACTGCTTTCAATACTAGGAAACTAAAAGCAGAAGTGTTTTCTGTCACTTGCGCAGATTTACCATTAGTCG
Ogt_G300_S4	X	[mm10]chrX:101716968-101717028	352	CGATTAGTAGGAAGCTGCCGTGGGCTTTGACTCTTCTAAGAGAATAAATACTTGAGCTACTCACATACCCTTGCTGAAAACGCAGATTTACCATTAGTCG
Ogt_G300_S4	X	[mm10]chrX:101717277-101717337	353	CGATTAGTAGGAAGCTGCCGTTAATTTAACTCCTAACTCCTTGGGGCTGGTGAGAAAGAGAAGGAAAGAGGGGCGGGGGGACGAGATTAGTTCTTTAGCG
Ogt_G300_S4	X	[mm10]chrX:101717340-101717400	354	CGATTAGTAGGAAGCTGCCGGGGGGGAGTGTGCACGCACGGACACACACACACACACACACCCAATGAACGAAACAAAAGACGAGATTAGTTCTTTAGCG
Ogt_G300_S4	X	[mm10]chrX:101717403-101717463	355	CGATTAGTAGGAAGCTGCCGGAGTCCACCAACTTCATACACACAAATATGCATGTATGCATACATACATACACACATACAACGAGATTAGTTCTTTAGCG
Ogt_G300_S4	X	[mm10]chrX:101717467-101717527	356	CGATTAGTAGGAAGCTGCCGTGTATACAGACCTAAAGATAGACATATACATAGTCACACATAGAACAGCTAGAGCAAAGCACGAGATTAGTTCTTTAGCG
Ogt_G300_S4	X	[mm10]chrX:101718299-101718359	357	CGATTAGTAGGAAGCTGCCGAACAAACAAATAAACAAAAATGTGTATAAGAAACCAATCCTCACCAGCCTGGCCTCAATGCGCAGATTTACCATTAGTCG
Ogt_G300_S4	X	[mm10]chrX:101718362-101718422	358	CGATTAGTAGGAAGCTGCCGGTCACGTCAGCCAGTACTGCCATTGGCCATTGTTCCCTGACCATAAAAGGTCCCTGGTGTCGCAGATTTACCATTAGTCG
Ogt_G300_S4	X	[mm10]chrX:101718488-101718548	360	CGATTAGTAGGAAGCTGCCGTCTGAAGGTCCCTGGTGTAACTAATAAGAGTGTGCCTTTCTGGGCTGGAGAGATGGCTCACGCAGATTTACCATTAGTCG
Ogt_G300_S4	X	[mm10]chrX:101718966-101719026	362	CGATTAGTAGGAAGCTGCCGAAGCCCCCTTAAAGTTTCATATAATTCTTAGATTAAGAGGGATATGAGGGCAGCAAGCAGACGAGATTAGTTCTTTAGCG
Ogt_G300_S4	X	[mm10]chrX:101719029-101719089	363	CGATTAGTAGGAAGCTGCCGAGAACTCCATAACAGCATATAGTCCTAAGGGCTGTGCTGTACTGAGGTCCACCCATGTGGACGAGATTAGTTCTTTAGCG
Ogt_G300_S4	X	[mm10]chrX:101719094-101719154	364	CGATTAGTAGGAAGCTGCCGGTAACTCGTGGGCTGCATTCCATGACTTCTAAAGCCACTTAGTGTTCTGCTGGTCTGGGTACGAGATTAGTTCTTTAGCG
Ogt_G300_S4	X	[mm10]chrX:101719449-101719509	365	CGATTAGTAGGAAGCTGCCGAGCTCTTATGACAGATGCTCTCAGATGATGGAATAAATCCCACATGCTCGTTTATTCCTTCGCAGATTTACCATTAGTCG
Ogt_G300_S4	X	[mm10]chrX:101719512-101719572	366	CGATTAGTAGGAAGCTGCCGAATAGGATATTAGATACAGTTTTGGAATAGGTTGGGGTCTGAAAGCAGGTGCTTTCTATTCGCAGATTTACCATTAGTCG
Ogt_G300_S4	X	[mm10]chrX:101719579-101719639	367	CGATTAGTAGGAAGCTGCCGTCTGAGATGTTAGGGATGCCTCATGTACAAGTGGAAGGGCTTGGGGTGCTACCCCTATGTCGCAGATTTACCATTAGTCG
Ogt_G300_S4	X	[mm10]chrX:101719642-101719702	368	CGATTAGTAGGAAGCTGCCGTGATGGCCACAATTCTCTTATGGGGGGCTGTGGCTACGTTAGAGGGGTATAGTGCTGGGACGCAGATTTACCATTAGTCG
Ogt_G300_S4	X	[mm10]chrX:101719990-101720050	369	CGATTAGTAGGAAGCTGCCGGCATGGCCCTTGGCTTAAGTTTAGAATTTAAGATCCTTCTGTTAGCTTTCTTTGTTTTGTACGAGATTAGTTCTTTAGCG
Ogt_G300_S4	X	[mm10]chrX:101720116-101720176	371	CGATTAGTAGGAAGCTGCCGATTAACTGTTCTGGAAAATTCTCCATCTCAGGAACCTGAGAAGTCAGAAACTCACCATGTACGAGATTAGTTCTTTAGCG
Ogt_G300_S4	X	[mm10]chrX:101720179-101720239	372	CGATTAGTAGGAAGCTGCCGCATTTCTTTTTCTAGCTCTGTGGGCTTGTCTCTCTGACTATGAATTGCTCTAGCCATGGTACGAGATTAGTTCTTTAGCG
Ogt_G300_S4	X	[mm10]chrX:101720537-101720597	373	CGATTAGTAGGAAGCTGCCGCCAGACACCTCTAAGCCCCAGTGTCTTCATCTGCAAGATAGAGATGGGAACAAACAGTACCGCAGATTTACCATTAGTCG
Ogt_G300_S4	X	[mm10]chrX:101720600-101720660	374	CGATTAGTAGGAAGCTGCCGCTTCTTGGATGGGTGGCTGTGAGAATTAAATGTGATGCAAAAAGAGGTTCTTTGCAAATGCGCAGATTTACCATTAGTCG
Ogt_G300_S4	X	[mm10]chrX:101720663-101720723	375	CGATTAGTAGGAAGCTGCCGAAATACCATTGGTGTTCCTCAGTAAAGGTAAAGCTGGGGTCACTCTGTGTCCTGGGAAAGCGCAGATTTACCATTAGTCG
Ogt_G300_S4	X	[mm10]chrX:101720726-101720786	376	CGATTAGTAGGAAGCTGCCGTCAGGCTTAAGTACAACAGTGGGAAATCACAGTTCACTCCAGGGAATGTTTGAGTTGCACCGCAGATTTACCATTAGTCG
Ogt_G300_S4	X	[mm10]chrX:101721044-101721104	377	CGATTAGTAGGAAGCTGCCGAAGGGAAAAATATACTTCAAATGCCTCTGAGGGTTTTGGCCAGTTGTGATGAAATGTTGAACGAGATTAGTTCTTTAGCG
Ogt_G300_S4	X	[mm10]chrX:101721170-101721230	379	CGATTAGTAGGAAGCTGCCGAATGAGAACCATCAAAGGAGCGCTCTAGACAAGTGTGGTGATCGGTCTTGAGGGTGAAACACGAGATTAGTTCTTTAGCG
Ogt_G300_S4	X	[mm10]chrX:101721233-101721293	380	CGATTAGTAGGAAGCTGCCGGTCTCATACCTTTGAGACTATTCCAAGATTAAAGAGAAACATGAATGAAAGCTTGGGGAAACGAGATTAGTTCTTTAGCG
Ogt_G300_S4	X	[mm10]chrX:101721542-101721602	381	CGATTAGTAGGAAGCTGCCGCATTTATTGAATACCCCTTGTATGCCAGCACTCTCTGCTGCTGCGCATGTGTACCGGGACCGCAGATTTACCATTAGTCG
Ogt_G300_S4	X	[mm10]chrX:101721605-101721665	382	CGATTAGTAGGAAGCTGCCGTGTTAATTTAAGCAGAATTGGACCACTCCATCAGTAGTGGTTTATTGGGGATCAAACTGCCGCAGATTTACCATTAGTCG
Ogt_G300_S4	X	[mm10]chrX:101721668-101721728	383	CGATTAGTAGGAAGCTGCCGGCTATCTTTCAGAGGGGCAGAGAGAAGCAAATTTGTAGAAAAGGAGGCAGATTTTATATGCGCAGATTTACCATTAGTCG
Ogt_G300_S4	X	[mm10]chrX:101721731-101721791	384	CGATTAGTAGGAAGCTGCCGGTCAGCAGGGTGGAGATCTTTATGCTGATACAGGCTGTTTGGATCAATCAGGAACTAGATCGCAGATTTACCATTAGTCG
Ogt_G300_S4	X	[mm10]chrX:101722084-101722144	385	CGATTAGTAGGAAGCTGCCGGAGTCACATGTATTGAGGAAAAGAAGATGATAGGAAGGAGCTGGACAATTTATTTAACCTACGAGATTAGTTCTTTAGCG
Ogt_G300_S4	X	[mm10]chrX:101722147-101722207	386	CGATTAGTAGGAAGCTGCCGTTTACCCGTGTTTTCTGTAAAATGGGGCCAATAAAAGTCCAGTCATCCTTCTGTGCCTGCACGAGATTAGTTCTTTAGCG
Ogt_G300_S4	X	[mm10]chrX:101722210-101722270	387	CGATTAGTAGGAAGCTGCCGGAACTGGTTCTGGTACCCCTCAACAAATGACAAAACCTAAAATGCTCAAATACCTTATATACGAGATTAGTTCTTTAGCG
Ogt_G300_S4	X	[mm10]chrX:101722273-101722333	388	CGATTAGTAGGAAGCTGCCGATGTCCTCTACTCATCCTCCGCTACACTTCATCCCACCTGTATGCTACTTCCAATGCCCGACGAGATTAGTTCTTTAGCG
Ogt_G300_S4	X	[mm10]chrX:101722631-101722691	389	CGATTAGTAGGAAGCTGCCGGCCTTGGGGATTAGGTTAGGGGAAGTTAAGTTGAAATCAGTAGGCACAAGTGCACAGGAACGCAGATTTACCATTAGTCG
Ogt_G300_S4	X	[mm10]chrX:101722694-101722754	390	CGATTAGTAGGAAGCTGCCGGTGACAGGGAGCTACTGCTGAATAAAGTCCACCTGCTAGTAGCTTGGTGGTATGTACTGGCGCAGATTTACCATTAGTCG
Ogt_G300_S4	X	[mm10]chrX:101722757-101722817	391	CGATTAGTAGGAAGCTGCCGAGAAATCCAGAGGCAGAGGCCTGCTGGCCAGTCCCCTTGATTGTTCACTTTGGTTTTCTTCGCAGATTTACCATTAGTCG
Ogt_G300_S4	X	[mm10]chrX:101722820-101722880	392	CGATTAGTAGGAAGCTGCCGTGTTTGTTTGTTTGTTTGTCTTGCCATGCTTCCTGCATGCGAGGAAAGCACTCTGTCCCTCGCAGATTTACCATTAGTCG
Ogt_G300_S4	X	[mm10]chrX:101723178-101723238	393	CGATTAGTAGGAAGCTGCCGTCCTGATTAGTTAACGTAATTAAGTCCTTCCCAGGACTTCAACTAAGCGCCCATTCTTCCACGAGATTAGTTCTTTAGCG
Ogt_G300_S4	X	[mm10]chrX:101723307-101723367	395	CGATTAGTAGGAAGCTGCCGCGCCTAGGGAAGATAGTTCCTCTTGCCTTTTTTTAAAAAAGTGTTCTCTTATGTTTTGAGACGAGATTAGTTCTTTAGCG
Ogt_G300_S4	X	[mm10]chrX:101723370-101723430	396	CGATTAGTAGGAAGCTGCCGTTCATATGTGAGTACTATATTTATATCATTTCCACCACTCCCTGCTTCAACCCCTTCTCTACGAGATTAGTTCTTTAGCG
Ogt_G300_S4	X	[mm10]chrX:101723700-101723760	397	CGATTAGTAGGAAGCTGCCGTCACTCTTATTTTCCGATCTGCTAAGAGTTGTTTTCTAGGGAGATGCCTCAGCAGTTATGCGCAGATTTACCATTAGTCG
Ogt_G300_S4	X	[mm10]chrX:101723763-101723823	398	CGATTAGTAGGAAGCTGCCGTCATAACTTTTTTTTTTTTTTTTTGCTTTTGCAGTGGACCCAGGTGTGGTTCCCAGCATGCGCAGATTTACCATTAGTCG
Ogt_G300_S4	X	[mm10]chrX:101723826-101723886	399	CGATTAGTAGGAAGCTGCCGATGGCAACTCACAACTGCTTTATAGTTCCAAGCTCCAGGGAACCCAACACTATCTTCTGGCGCAGATTTACCATTAGTCG
Ogt_G300_S4	X	[mm10]chrX:101723889-101723949	400	CGATTAGTAGGAAGCTGCCGCTTCTGTTACACACACGGTACACATAAACTCAGGCTTACACCCATACATTTAAATAGAAACGCAGATTTACCATTAGTCG
Ogt_G300_S4	X	[mm10]chrX:101724247-101724307	401	CGATTAGTAGGAAGCTGCCGTAGAGAGGGCATCTTGACCCTTGGATACTGAGAGAATGGAGATGCTGGTTTTGGCAAGGGACGAGATTAGTTCTTTAGCG
Ogt_G300_S4	X	[mm10]chrX:101724310-101724370	402	CGATTAGTAGGAAGCTGCCGTGAGCAGGTGGGCCTGGAAAATCATCTCCTATGTTGAGTTCCTAGGGATTGGTGAAGCATACGAGATTAGTTCTTTAGCG
Ogt_G300_S4	X	[mm10]chrX:101724373-101724433	403	CGATTAGTAGGAAGCTGCCGATAATGATATCCTCTATGCAACACACAGAAGGCCTGTCCACCTAGAAATGACAGCTCAAAACGAGATTAGTTCTTTAGCG
Ogt_G300_S4	X	[mm10]chrX:101724436-101724496	404	CGATTAGTAGGAAGCTGCCGGTGACATAGTCTGCCAGGTAAGTGTAATTTAGCAGGTTTCTTCCATCTACCCCTACCATAACGAGATTAGTTCTTTAGCG
Ogt_G300_S4	X	[mm10]chrX:101724744-101724804	405	CGATTAGTAGGAAGCTGCCGGTTGAGAGTACAGGTTGACACAGGGTCTCATTGTGTAGCCAGGGCTGGTCTCACACTCACCGCAGATTTACCATTAGTCG
Ogt_G300_S4	X	[mm10]chrX:101724809-101724869	406	CGATTAGTAGGAAGCTGCCGAGCTCAGGCTGACCTAGAATTTGTGTAGTCCTCCTTCCTCAGCCTTCCAGTGCTAGGATTCGCAGATTTACCATTAGTCG
Ogt_G300_S4	X	[mm10]chrX:101724935-101724995	408	CGATTAGTAGGAAGCTGCCGTATTTTGATTATATTCTTTCCCCTTTCCCAGATCTGCCCTATCCACCCAACTTTCTGTGTCGCAGATTTACCATTAGTCG
Ogt_G300_S4	X	[mm10]chrX:101725362-101725422	409	CGATTAGTAGGAAGCTGCCGCTGGCCTCCACATGTATGCACATACACACATAATAAATCAATAAATGTATAATAGAGCCCACGAGATTAGTTCTTTAGCG
Ogt_G300_S4	X	[mm10]chrX:101725425-101725485	410	CGATTAGTAGGAAGCTGCCGTCAGATCTCTATCTCACTCCAAGCTTCTGCTGACCAAATCTCATGGTCCAGATAGTCCCTACGAGATTAGTTCTTTAGCG
Ogt_G300_S4	X	[mm10]chrX:101725488-101725548	411	CGATTAGTAGGAAGCTGCCGCCCACTTTTGTTTATAGAAGGAAGAAACCAATCCTTGTCCAGGTGCACTTGTAGCAATGCACGAGATTAGTTCTTTAGCG
Ogt_G300_S4	X	[mm10]chrX:101725551-101725611	412	CGATTAGTAGGAAGCTGCCGACAAGAAGATGAACATGTTAGAGCTGCTCCCAACCTGACTTCTTAAGGTTCAGCTGAAACACGAGATTAGTTCTTTAGCG
Ogt_G300_S4	X	[mm10]chrX:101726461-101726521	413	CGATTAGTAGGAAGCTGCCGATTGGTCACTGCAGGGCCTAGCTAGAGACAGAGTTGGAGGGACGGCACTGGGGCAGAGAGCGCAGATTTACCATTAGTCG
Ogt_G300_S4	X	[mm10]chrX:101726524-101726584	414	CGATTAGTAGGAAGCTGCCGTCAGCAGAAGTGCAGGAAGCCTGCTGGCATTTAAAAAAAAATATTTCCTGCAACAAATGTCGCAGATTTACCATTAGTCG
Ogt_G300_S4	X	[mm10]chrX:101726591-101726651	415	CGATTAGTAGGAAGCTGCCGGCAAATACAGGAAAGGTCTTTCTCATACTTTTTTCCAATTACTTTGTCATTTCAGGCTCCCGCAGATTTACCATTAGTCG
Ogt_G300_S4	X	[mm10]chrX:101726654-101726714	416	CGATTAGTAGGAAGCTGCCGAGCTCTTGGTTTGTTTTGGTTTGTTTTTCTGGTGCTGGGAATTGAACTGAGGGTTTCATGCGCAGATTTACCATTAGTCG
Ogt_G300_S4	X	[mm10]chrX:101727016-101727076	417	CGATTAGTAGGAAGCTGCCGCTGCTGATGCCTGGGGCTCCTCAGAACCCACAGAAAACAGTTTTGGGCACAAGGTTAAGGACGAGATTAGTTCTTTAGCG
Ogt_G300_S4	X	[mm10]chrX:101727083-101727143	418	CGATTAGTAGGAAGCTGCCGGCTGATGTTGAGGTATCATTATTTATTTATTTAGGTATTGAATCTCCTTCCTCAGCAGGGACGAGATTAGTTCTTTAGCG
Ogt_G300_S4	X	[mm10]chrX:101727146-101727206	419	CGATTAGTAGGAAGCTGCCGGCCACTATACCAGATATTTGAACACTGAGTGCTTCATCTGTGCCAGATGCAAAGGGCCTCACGAGATTAGTTCTTTAGCG
Ogt_G300_S4	X	[mm10]chrX:101727209-101727269	420	CGATTAGTAGGAAGCTGCCGTCTTGCTGTCATTATTTTGGAAGAATGGAACCCCCATTGTGCCCCATTTAAGGCCATTTGACGAGATTAGTTCTTTAGCG
Ogt_G300_S4	X	[mm10]chrX:101728122-101728182	421	CGATTAGTAGGAAGCTGCCGTTGGATCCAAGATTGTATTTGTATATTTCTGTGGAAACCAGAGAAAATGGCCACCAATTGCGCAGATTTACCATTAGTCG
Ogt_G300_S4	X	[mm10]chrX:101728185-101728245	422	CGATTAGTAGGAAGCTGCCGGGCTTAGATCTGCATGAATGTCTTATCTTAGAGTTCTGGCAGTCCTGAGCCTAGGATGAGCGCAGATTTACCATTAGTCG
Ogt_G300_S4	X	[mm10]chrX:101728248-101728308	423	CGATTAGTAGGAAGCTGCCGTCGAGATAACAATCTCAATCTTGACCTTCCTCTCTGGAGAATGAAGTTCTCTGTCTTTCCCGCAGATTTACCATTAGTCG
Ogt_G300_S4	X	[mm10]chrX:101728311-101728371	424	CGATTAGTAGGAAGCTGCCGCTCCTAGTTCCTCGCACAGCCCCTGCCTGCATGGCTTCTTCAAAGACAAAACATCTTTTGCGCAGATTTACCATTAGTCG
Ogt_G300_S4	X	[mm10]chrX:101728666-101728726	425	CGATTAGTAGGAAGCTGCCGTTGAGACAGAGTTTCTCATGTGGCTGTAGGTCGTTCCGACTAGGCTAGGTTGGCTAACCAACGAGATTAGTTCTTTAGCG
Ogt_G300_S4	X	[mm10]chrX:101728729-101728789	426	CGATTAGTAGGAAGCTGCCGCATTACTGTGCTCTTCCTGTTACCACCTCCCCAGGACTGGGGTTACAAGTACACACTACCACGAGATTAGTTCTTTAGCG
Ogt_G300_S4	X	[mm10]chrX:101728855-101728915	428	CGATTAGTAGGAAGCTGCCGTTTGCTAGGACTAAATTCAGGTCACTGTGCTTACATGGTTAAGTACTTTACAAATTGAGCACGAGATTAGTTCTTTAGCG
Ogt_G300_S4	X	[mm10]chrX:101729700-101729760	429	CGATTAGTAGGAAGCTGCCGACCTCACCCTTCTGCTTGCTTAAGACAGGACTTTCCTTATTTAACCCCAGGCTAGTCTAACGCAGATTTACCATTAGTCG
Ogt_G300_S4	X	[mm10]chrX:101729763-101729823	430	CGATTAGTAGGAAGCTGCCGCCATGGTGTCACCTAGGTTAGCCTCAAATCGTTGATCTTCCTGCCGTATCCTCCCAAGCACGCAGATTTACCATTAGTCG
Ogt_G300_S4	X	[mm10]chrX:101729826-101729886	431	CGATTAGTAGGAAGCTGCCGAGATTATAGGGATGTACCACTGTGCTTGGCGAGTGCCCTTTACCTGATCACAAGCTCTAGCGCAGATTTACCATTAGTCG
Ogt_G300_S4	X	[mm10]chrX:101729889-101729949	432	CGATTAGTAGGAAGCTGCCGTCAGAGTATAGGTGTCTTGATGGACCCAGTTTTTGGCCTGCTACAAATAATGCTTATCTTCGCAGATTTACCATTAGTCG
Ogt_G300_S4	X	[mm10]chrX:101730234-101730294	433	CGATTAGTAGGAAGCTGCCGAGCCCTGTCACCTACCCTTCTGGAAAGCACTGGTTATTTTTTCCACTCAGCTTTAGACATACGAGATTAGTTCTTTAGCG
Ogt_G300_S4	X	[mm10]chrX:101730297-101730357	434	CGATTAGTAGGAAGCTGCCGAACTGCTCCTTGTTGCCCACTTCTTGCTTTGGTGGCTTCATGCTAATGTCTGCTAGCAAAACGAGATTAGTTCTTTAGCG
Ogt_G300_S4	X	[mm10]chrX:101730360-101730420	435	CGATTAGTAGGAAGCTGCCGATCATCAGGCCCACCCAGTTGCTGGTGTGGGGTGTGTGTGTGTGTGTGTGTGTGTGTGTGACGAGATTAGTTCTTTAGCG
Ogt_G300_S4	X	[mm10]chrX:101730423-101730483	436	CGATTAGTAGGAAGCTGCCGGTGTGCATGTATGTGAAAGCCATAGGAGCATATTGAGTGTTCTCTATTACTTTCTACCTTACGAGATTAGTTCTTTAGCG
Ogt_G300_S4	X	[mm10]chrX:101730810-101730870	437	CGATTAGTAGGAAGCTGCCGGAGACCATTTTTTTTTGAGAGAGAGAGAGAGAGAGAGAGAGAGAGAGAGAGAGAGAGAGACGCAGATTTACCATTAGTCG
Ogt_G300_S4	X	[mm10]chrX:101730873-101730933	438	CGATTAGTAGGAAGCTGCCGAGAAAGAGAGAGAGAGAGAGAGAGTTTCTCACTGTGTAGCCCTGGTGGGCCTGGAACTCACGCAGATTTACCATTAGTCG
Ogt_G300_S4	X	[mm10]chrX:101730940-101731000	439	CGATTAGTAGGAAGCTGCCGGAACAGGCTGGCTTTGAACAGAGATCAGCCTGCCTCTGCCTCCCAAATACCGGTATGTACCGCAGATTTACCATTAGTCG
Ogt_G300_S4	X	[mm10]chrX:101731003-101731063	440	CGATTAGTAGGAAGCTGCCGCACCTCTAGCCCAGACCACTTATAGTGTCCCCAAAGCATTACTGTCTTCAGCCTCTCTGCCGCAGATTTACCATTAGTCG
Ogt_G300_S4	X	[mm10]chrX:101731371-101731431	441	CGATTAGTAGGAAGCTGCCGGACTGTATCTAGCAGTTCCACTAGGCCACAGTGGGTGCAGTAGAGGGCACAGTAGAACCCACGAGATTAGTTCTTTAGCG
Ogt_G300_S4	X	[mm10]chrX:101731434-101731494	442	CGATTAGTAGGAAGCTGCCGAGGGCAGAGAGACAAACTCTAAGCCAGACAGAATGTGGCAGGAAATACACGCCAGAGTCCACGAGATTAGTTCTTTAGCG
Ogt_G300_S4	X	[mm10]chrX:101731497-101731557	443	CGATTAGTAGGAAGCTGCCGCAGACCTGGTTCAAAGAATGACTGTGAATACGCCCTGGTCCTCATTACCTTGTTTATTGAACGAGATTAGTTCTTTAGCG
Ogt_G300_S4	X	[mm10]chrX:101731564-101731624	444	CGATTAGTAGGAAGCTGCCGAGTGAGGTTTCTAGAAATAAAATTGGGCAAATATTGAGATACTGAGATGGGCACATTCAGACGAGATTAGTTCTTTAGCG
Ogt_G300_S4	X	[mm10]chrX:101731922-101731982	445	CGATTAGTAGGAAGCTGCCGGCTGCGCAGGCTACAGTTCCAGTCCAGAATTACAAGCCCAGGTAGGAGGCCTCAGTTGTCCGCAGATTTACCATTAGTCG
Ogt_G300_S4	X	[mm10]chrX:101731985-101732045	446	CGATTAGTAGGAAGCTGCCGGACCAGGATGATTCTCTCCGTGAAGATGACGGCTGCCGCTGGGGCCCTCTCTGGTCAGAGCGCAGATTTACCATTAGTCG
Ogt_G300_S4	X	[mm10]chrX:101732048-101732108	447	CGATTAGTAGGAAGCTGCCGCCCAGGCGCGTGAACAACATCCACATTTGCTCTCTGAACTTCACTCCCACAAAGGCATAGCGCAGATTTACCATTAGTCG
Ogt_G300_S4	X	[mm10]chrX:101732111-101732171	448	CGATTAGTAGGAAGCTGCCGAGCGGATTGAGGCAGCAGTGCATGTACCCCATGCCCGAGGTGACTGACTTGGCCACATCCCGCAGATTTACCATTAGTCG
Ogt_G300_S4	X	[mm10]chrX:101732469-101732529	449	CGATTAGTAGGAAGCTGCCGGCTGATCGTAGTTGGCTGATAGGTAGATGAAATCTGGGAGGGCAAAGAGCAGACAGAGACACGAGATTAGTTCTTTAGCG
Ogt_G300_S4	X	[mm10]chrX:101732532-101732592	450	CGATTAGTAGGAAGCTGCCGATACAACTATGCAGGTGAGGGCTACACGTACCCGGGGGTCCCTGCGGTAGATCTGGGTGGACGAGATTAGTTCTTTAGCG
Ogt_G300_S4	X	[mm10]chrX:101732595-101732655	451	CGATTAGTAGGAAGCTGCCGGCACTATGCTCAGATATCTGTCGAAGCTTATACAAGCCAGCAGGAAGGCCCCTGCATAGAACGAGATTAGTTCTTTAGCG
Ogt_G300_S4	X	[mm10]chrX:101732658-101732718	452	CGATTAGTAGGAAGCTGCCGTGATGTTGAACAAGGCGCCTGCCACTTTGCAGAGGCCAGGGCCGAAAACCCACTGGACAGACGAGATTAGTTCTTTAGCG
Ogt_G300_S4	X	[mm10]chrX:101733016-101733076	453	CGATTAGTAGGAAGCTGCCGGGCATCTAGCACTTGACGTTCACTAACCTGCCCGAGGAAGGGGGAGAGAGGGAAGGGAGGCGCAGATTTACCATTAGTCG
Ogt_G300_S4	X	[mm10]chrX:101733079-101733139	454	CGATTAGTAGGAAGCTGCCGTTCTCTGTAAAGACCCAGCAACTGGCTTTGCCCCTTTGTGCCCTGTCATTTATTCTGGTGCGCAGATTTACCATTAGTCG
Ogt_G300_S4	X	[mm10]chrX:101733142-101733202	455	CGATTAGTAGGAAGCTGCCGGTTTGTTTCCCTTAGCAATAGCCAGACCCTGAGCTGACTCTTTCTCTCCGGGGACCACATCGCAGATTTACCATTAGTCG
Ogt_G300_S4	X	[mm10]chrX:101733205-101733265	456	CGATTAGTAGGAAGCTGCCGCTTAACTCCATCTACTCAGACTGGGAAGGTGACCCCCCCTTTTCAAAGGCTGGTAACCCCCGCAGATTTACCATTAGTCG
Ogt_G300_S4	X	[mm10]chrX:101733563-101733623	457	CGATTAGTAGGAAGCTGCCGCTACACACACCGTACATGCCTCTCTTCCCCTACCCAGAGGCAGTGGGTACCCACTGAGCTACGAGATTAGTTCTTTAGCG
Ogt_G300_S4	X	[mm10]chrX:101733626-101733686	458	CGATTAGTAGGAAGCTGCCGCACCCAAGCCCTAATTGGTCTTCCCAAGATGGCCAGGCTGATTTCAAACTCTTGGGCTCAACGAGATTAGTTCTTTAGCG
Ogt_G300_S4	X	[mm10]chrX:101733689-101733749	459	CGATTAGTAGGAAGCTGCCGGAGCTTTCTGCCTCTGCCTCCCAAGTAGCTCAGACAATGGGGGCATACCACTTCCACTTCACGAGATTAGTTCTTTAGCG
Ogt_G300_S4	X	[mm10]chrX:101733752-101733812	460	CGATTAGTAGGAAGCTGCCGTCTACACCTTATCCCAAACTATCTGAGAACTAGAGATCACCGAAGTTGAGTTTCTACAGCACGAGATTAGTTCTTTAGCG
Ogt_G300_S4	X	[mm10]chrX:101734111-101734171	461	CGATTAGTAGGAAGCTGCCGGCTTCTCTGCCTTTGGCACTTGTGGTTGGGAACTTGCAGTGAACAGAGGAAGTGAAGATTCGCAGATTTACCATTAGTCG
Ogt_G300_S4	X	[mm10]chrX:101734174-101734234	462	CGATTAGTAGGAAGCTGCCGCGGCTCAGCACAGCCTCTTCCAAAGGGTAATCTATACCAGCCCTCCGCAGAGGGCTTTTCCGCAGATTTACCATTAGTCG
Ogt_G300_S4	X	[mm10]chrX:101734237-101734297	463	CGATTAGTAGGAAGCTGCCGCTTTTCTGCCACGCCTGTGGTCAGGTGAATACACTTAGAAGGGGCTAGCCAGGAACTTGGCGCAGATTTACCATTAGTCG
Ogt_G300_S4	X	[mm10]chrX:101734304-101734364	464	CGATTAGTAGGAAGCTGCCGACAAAGCCTGCAGTTCTTGTCTTACTCAATATCATTCATAAACAACTAAGTGAGTCTAGGCGCAGATTTACCATTAGTCG
Ogt_G300_S4	X	[mm10]chrX:101734662-101734722	465	CGATTAGTAGGAAGCTGCCGAAAGTCATCTGGAATGTCCATTTAATGTCCAGATCAGATGGAACTATTCAGGAGCACGCTACGAGATTAGTTCTTTAGCG
Ogt_G300_S4	X	[mm10]chrX:101734725-101734785	466	CGATTAGTAGGAAGCTGCCGGGGCTGGGAAATGCTTGATACCTCAGTGATCGGCAGGTGGGCATGTGTGGCGCAGACAAGACGAGATTAGTTCTTTAGCG
Ogt_G300_S4	X	[mm10]chrX:101734788-101734848	467	CGATTAGTAGGAAGCTGCCGTGCAGCTGATAGGGCAACAGGCTATCAGGAATGTTGGAGTTCCATCTGGTGAGAAAGCAAACGAGATTAGTTCTTTAGCG
Ogt_G300_S4	X	[mm10]chrX:101734851-101734911	468	CGATTAGTAGGAAGCTGCCGACCTGGGACCCAGGGAAGGGTCTGGGGTGGCTGTCTGGGGGAAGGTTCTTTGAGGAAAGGACGAGATTAGTTCTTTAGCG
Ogt_G300_S4	X	[mm10]chrX:101735209-101735269	469	CGATTAGTAGGAAGCTGCCGGTGGCAGGAGGGTGGGGCAGTCCACTCTCTTGTAAATAGACAAACTGATGTATTCATCCACGCAGATTTACCATTAGTCG
Ogt_G300_S4	X	[mm10]chrX:101735272-101735332	470	CGATTAGTAGGAAGCTGCCGAAACACAAGTGGAGAGCCACATATTTTTCATGAGGCTGAATGCAGAGGAGCTTATGCCCACGCAGATTTACCATTAGTCG
Ogt_G300_S4	X	[mm10]chrX:101735335-101735395	471	CGATTAGTAGGAAGCTGCCGGGTAGAAGAGGCAAGTAACAGACTATTGTATGTACTTTGGTACTACCCATGCACATGTAGCGCAGATTTACCATTAGTCG
Ogt_G300_S4	X	[mm10]chrX:101735398-101735458	472	CGATTAGTAGGAAGCTGCCGGTGCCATACTAGGCTACAGTATGCATGCATCAGTGCTGGGTAGTGGAAGTCGGGACTGGACGCAGATTTACCATTAGTCG
Ogt_G300_S4	X	[mm10]chrX:101735756-101735816	473	CGATTAGTAGGAAGCTGCCGTTATTGAGATGGCATGCTCCTGCCCAAACTTAGCGCTCGTCTCTTCCTATGGACAGGTGGACGAGATTAGTTCTTTAGCG
Ogt_G300_S4	X	[mm10]chrX:101735819-101735879	474	CGATTAGTAGGAAGCTGCCGACTTCTCTGAAACAACCACCACCTGCAGGGCTCAGGTGAAAAGGACCCGAGGTCTTAGACACGAGATTAGTTCTTTAGCG
Ogt_G300_S4	X	[mm10]chrX:101735882-101735942	475	CGATTAGTAGGAAGCTGCCGGTCAGGAGCTGTGTGTATGGAGGGGACTAAGGATTCCTGAGGGCCCGCCAGTCAGGATGTACGAGATTAGTTCTTTAGCG
Ogt_G300_S4	X	[mm10]chrX:101735945-101736005	476	CGATTAGTAGGAAGCTGCCGTGACTTGGCACTTGACTGACTATAGAGACAGAGATGACAGAAGCCTGGAAAACACGACAAACGAGATTAGTTCTTTAGCG
Ogt_G300_S4	X	[mm10]chrX:101736303-101736363	477	CGATTAGTAGGAAGCTGCCGTAGGGTCCCCTAATCTCCTTCCTGGCCCTTAGTCTCCCCATTTGTCCTCATTGATCTTTACGCAGATTTACCATTAGTCG
Ogt_G300_S4	X	[mm10]chrX:101736366-101736426	478	CGATTAGTAGGAAGCTGCCGTCCCAGGTTGCAGGGAGGGATGCTGGACTGAAGGTCATGTGTAGAGAAGCCTTCCTTTCTCGCAGATTTACCATTAGTCG
Ogt_G300_S4	X	[mm10]chrX:101736429-101736489	479	CGATTAGTAGGAAGCTGCCGGCCTGGCAGCCAGATGTTAGCATTAGGCCCCGATAGACCAGGTGGCTCTCTTGGTTTGCTCGCAGATTTACCATTAGTCG
Ogt_G300_S4	X	[mm10]chrX:101736492-101736552	480	CGATTAGTAGGAAGCTGCCGGTGACTTGTATATCTGTCTTGGGGGTGGCAGAGCACCGACCTTGTCTGGACTCCAGGCCTCGCAGATTTACCATTAGTCG
Ogt_G50_S1	X	[mm10]chrX:101672460-101672520	1	CGACAACATAGTATCCTCGAGGAAAAGCAGCCGACCGCATCCACCAAGATGGAATTCACATCCTTGTGAATATGAATGGGACGAGATTAGTTCTTTAGCG
Ogt_G50_S1	X	[mm10]chrX:101672570-101672630	2	CGACAACATAGTATCCTCGATCAGGTAAAAGAACAATCACTTACAATGTCTATTGGTCTGAAAAGATAGTGGGTTTTGGGCGCAGATTTACCATTAGTCG
Ogt_G50_S1	X	[mm10]chrX:101672680-101672740	3	CGACAACATAGTATCCTCGATTTTAAAAGTGTGTTCTTGGAATGGACGAGGATAGATTTTTAGGTGTAGACATAGTGCCTACGAGATTAGTTCTTTAGCG
Ogt_G50_S1	X	[mm10]chrX:101672790-101672850	4	CGACAACATAGTATCCTCGACTCCTTTGCTTAACACATTTGAAGAACACCTTAACACAAAGTTATTTGGAAAGGCTGCTGCGCAGATTTACCATTAGTCG
Ogt_G50_S1	X	[mm10]chrX:101672900-101672960	5	CGACAACATAGTATCCTCGATTGAGAGCCTTTTGATGAAGATTCTCGTTTGAAAGAACTCCTTTGGGGAGATGGTTGCTAACGAGATTAGTTCTTTAGCG
Ogt_G50_S1	X	[mm10]chrX:101673010-101673070	6	CGACAACATAGTATCCTCGATGGTCTGATTGTTTTTGTTTGTATTTTTTTAAGGCCATGTGGCTGGGCTACCCTGGGACTCGCAGATTTACCATTAGTCG
Ogt_G50_S1	X	[mm10]chrX:101673120-101673180	7	CGACAACATAGTATCCTCGAAGCTGAAGTTGCAGAGCAGTATTCTGAGAAACTGGCTTATATGCCCCATACTTTCTTTATACGAGATTAGTTCTTTAGCG
Ogt_G50_S1	X	[mm10]chrX:101673230-101673290	8	CGACAACATAGTATCCTCGAGATATGAGGAAACCCCGAGAACTGTGTTTGATCCTCCCTTTGTTGTCCAGATTCACCTTTCGCAGATTTACCATTAGTCG
Ogt_G50_S1	X	[mm10]chrX:101673338-101673398	9	CGACAACATAGTATCCTCGAGATTTTAAATCCAATGGGCACATTTATGATAATCGGATAGTTCTGAATGGCATCGATCTCACGAGATTAGTTCTTTAGCG
Ogt_G50_S1	X	[mm10]chrX:101673558-101673618	10	CGACAACATAGTATCCTCGAGAGGTGACAATCCAGACAGCAGTAACACAGCTCTTAATATGCCCGTTATTCCCATGAATACGCAGATTTACCATTAGTCG
Ogt_G50_S1	X	[mm10]chrX:101673668-101673728	11	CGACAACATAGTATCCTCGAACAATTAACGGATTCAGTATTAGCAATGGACTGGCGACTACACAGGTAAAAGGACTGTAAACGAGATTAGTTCTTTAGCG
Ogt_G50_S1	X	[mm10]chrX:101673778-101673838	12	CGACAACATAGTATCCTCGACTCCATTTTACAGAGTAAGAGATAAGCTTATTGGGAACTGGCTCTTTTGAAGCTGTGTCTCGCAGATTTACCATTAGTCG
Ogt_G50_S1	X	[mm10]chrX:101673884-101673944	13	CGACAACATAGTATCCTCGACCTACTGTGCTAACATTTTGTATTTGCCTTTCTGTGCACCATATAGTTTTTGCTTCTGTAACGAGATTAGTTCTTTAGCG
Ogt_G50_S1	X	[mm10]chrX:101674548-101674608	14	CGACAACATAGTATCCTCGAACAAAGTCAGTTTAGATCTGCATTGGATCCCATTACAGATGGTTGTGAGCCACCATGTGGCGCAGATTTACCATTAGTCG
Ogt_G50_S1	X	[mm10]chrX:101674658-101674718	15	CGACAACATAGTATCCTCGACCACTGAGCCATCTCTCCAGCCTGTCAGTTTAGATCTTAAAGTCCCCAGTTTCTGTATTAACGAGATTAGTTCTTTAGCG
Ogt_G50_S1	X	[mm10]chrX:101674769-101674829	16	CGACAACATAGTATCCTCGATGTAGGTTTGGGTGTACATTATATTCAGCACAATGCAGTGTAGTTCCTTGTATTTGTATCCGCAGATTTACCATTAGTCG
Ogt_G50_S1	X	[mm10]chrX:101675003-101675063	17	CGACAACATAGTATCCTCGACACTCACGTGACAGTGTAAGACAAAAGTATGGGATTTTCTAATAAAGACTATAGTTGTCCACGAGATTAGTTCTTTAGCG
Ogt_G50_S1	X	[mm10]chrX:101675113-101675173	18	CGACAACATAGTATCCTCGATGACATTTACCTGGGAGAGTGTGTATAATTCGGAGAAGGCCACTTTATCAATGAACAGGGCGCAGATTTACCATTAGTCG
Ogt_G50_S1	X	[mm10]chrX:101675231-101675291	19	CGACAACATAGTATCCTCGAGAGACAAAGTTTATTTTGGGTAGCCCTGCCTGTCCTGGAACTCTCTGAACTGCCTCTGCCACGAGATTAGTTCTTTAGCG
Ogt_G50_S1	X	[mm10]chrX:101675356-101675416	20	CGACAACATAGTATCCTCGATGGTTTGGTTTTTGTGAGACAGGATCTGGCTATTTAGCCCAGACTATTCTAAAGCTTCACCGCAGATTTACCATTAGTCG
Ogt_G50_S1	X	[mm10]chrX:101675564-101675624	21	CGACAACATAGTATCCTCGAGGCCACTCTGGACTATATATATAGCAAGTTCCAGGCAACCCAAAGCTACTTGAGACCCTGACGAGATTAGTTCTTTAGCG
Ogt_G50_S1	X	[mm10]chrX:101675674-101675734	22	CGACAACATAGTATCCTCGACTGTAAGCCTAGCACTTGGGAAGCATGACTATTGAAACCATTTATATTGGGGGTGGGGAGCGCAGATTTACCATTAGTCG
Ogt_G50_S1	X	[mm10]chrX:101675784-101675844	23	CGACAACATAGTATCCTCGATGGGTCAGAAGAAAGAAGAGTATGTGTGTCAAGCACAGGACCTTATGCATTCTAGATAAGACGAGATTAGTTCTTTAGCG
Ogt_G50_S1	X	[mm10]chrX:101675894-101675954	24	CGACAACATAGTATCCTCGAAAAGGCTTTTGTCAGTGGGGTTCTCATATAGCCCTGGCTAGCTTCAAACACTGATTTTTGCGCAGATTTACCATTAGTCG
[truncated: 3,516 more rows]
